# Supplementary material
Source: Research Square preprint supplement (doi:10.21203/rs.3.rs-10317902/v1)
Supplement: Supplementary file 3 [file da5b3d87d91bf355835eb78b.xlsx]

## Sheet: S. Table 1
Accession	Population	Population Code (dating)	Population Code	Sample ID	Broad Population Group	Broad Population Group (full)	Species	Modern or Ancient
1_Lagune	Lagune	LAGU	LAGU	LAGU05	AFT	African taurine	Bos taurus	Modern
10_Lagune	Lagune	LAGU	LAGU	LAGU14	AFT	African taurine	Bos taurus	Modern
10015	Tuli	TULI	TULI	TULI20	SAC	South African Composite	Bos taurus/Bos indicus hybrid	Modern
10070	Bonsmara	BONS	BONS	BONS08	SAC	South African Composite	Bos taurus/Bos indicus hybrid	Modern
10084	Tuli	TULI	TULI	TULI21	SAC	South African Composite	Bos taurus/Bos indicus hybrid	Modern
11_Lagune	Lagune	LAGU	LAGU	LAGU15	AFT	African taurine	Bos taurus	Modern
11125	Tuli	TULI	TULI	TULI22	SAC	South African Composite	Bos taurus/Bos indicus hybrid	Modern
1119	Tuli	TULI	TULI	TULI12	SAC	South African Composite	Bos taurus/Bos indicus hybrid	Modern
11299	Drakensberger	DRAK	DRAK	DRAK04	SAC	South African Composite	Bos taurus/Bos indicus hybrid	Modern
12_Lagune	Lagune	LAGU	LAGU	LAGU16	AFT	African taurine	Bos taurus	Modern
1211	Nguni	NGUN	NGUN	NGUN16	AFS	African Sanga	Bos taurus/Bos indicus hybrid	Modern
1227	Tuli	TULI	TULI	TULI13	SAC	South African Composite	Bos taurus/Bos indicus hybrid	Modern
12280	Bonsmara	BONS	BONS	BONS09	SAC	South African Composite	Bos taurus/Bos indicus hybrid	Modern
12657	Nguni	NGUN	NGUN	NGUN19	AFS	African Sanga	Bos taurus/Bos indicus hybrid	Modern
1291	Tuli	TULI	TULI	TULI14	SAC	South African Composite	Bos taurus/Bos indicus hybrid	Modern
13_Lagune	Lagune	LAGU	LAGU	LAGU17	AFT	African taurine	Bos taurus	Modern
1311	Tuli	TULI	TULI	TULI15	SAC	South African Composite	Bos taurus/Bos indicus hybrid	Modern
13259	Bonsmara	BONS	BONS	BONS10	SAC	South African Composite	Bos taurus/Bos indicus hybrid	Modern
1356	Tuli	TULI	TULI	TULI16	SAC	South African Composite	Bos taurus/Bos indicus hybrid	Modern
13624	Nguni	NGUN	NGUN	NGUN20	AFS	African Sanga	Bos taurus/Bos indicus hybrid	Modern
14_Lagune	Lagune	LAGU	LAGU	LAGU18	AFT	African taurine	Bos taurus	Modern
15_Lagune	Lagune	LAGU	LAGU	LAGU19	AFT	African taurine	Bos taurus	Modern
16_Lagune	Lagune	LAGU	LAGU	LAGU20	AFT	African taurine	Bos taurus	Modern
17_Lagune	Lagune	LAGU	LAGU	LAGU21	AFT	African taurine	Bos taurus	Modern
18_Lagune	Lagune	LAGU	LAGU	LAGU22	AFT	African taurine	Bos taurus	Modern
19_Lagune	Lagune	LAGU	LAGU	LAGU23	AFT	African taurine	Bos taurus	Modern
2_Lagune	Lagune	LAGU	LAGU	LAGU06	AFT	African taurine	Bos taurus	Modern
20_Lagune	Lagune	LAGU	LAGU	LAGU24	AFT	African taurine	Bos taurus	Modern
21_Lagune	Lagune	LAGU	LAGU	LAGU25	AFT	African taurine	Bos taurus	Modern
2134	Bonsmara	BONS	BONS	BONS01	SAC	South African Composite	Bos taurus/Bos indicus hybrid	Modern
2135	Tuli	TULI	TULI	TULI17	SAC	South African Composite	Bos taurus/Bos indicus hybrid	Modern
2188	Drakensberger	DRAK	DRAK	DRAK02	SAC	South African Composite	Bos taurus/Bos indicus hybrid	Modern
22_Lagune	Lagune	LAGU	LAGU	LAGU26	AFT	African taurine	Bos taurus	Modern
2213	Bonsmara	BONS	BONS	BONS02	SAC	South African Composite	Bos taurus/Bos indicus hybrid	Modern
23_Lagune	Lagune	LAGU	LAGU	LAGU27	AFT	African taurine	Bos taurus	Modern
25_Lagune	Lagune	LAGU	LAGU	LAGU28	AFT	African taurine	Bos taurus	Modern
26_Lagune	Lagune	LAGU	LAGU	LAGU29	AFT	African taurine	Bos taurus	Modern
27_Lagune	Lagune	LAGU	LAGU	LAGU30	AFT	African taurine	Bos taurus	Modern
28_Lagune	Lagune	LAGU	LAGU	LAGU31	AFT	African taurine	Bos taurus	Modern
29_Lagune	Lagune	LAGU	LAGU	LAGU32	AFT	African taurine	Bos taurus	Modern
2X11244	Drakensberger	DRAK	DRAK	DRAK01	SAC	South African Composite	Bos taurus/Bos indicus hybrid	Modern
3_Lagune	Lagune	LAGU	LAGU	LAGU07	AFT	African taurine	Bos taurus	Modern
30_Lagune	Lagune	LAGU	LAGU	LAGU33	AFT	African taurine	Bos taurus	Modern
3004	Somba	SOMB	SOMB	SOMB05	AFT	African taurine	Bos taurus	Modern
31_Lagune	Lagune	LAGU	LAGU	LAGU34	AFT	African taurine	Bos taurus	Modern
3109	Somba	SOMB	SOMB	SOMB06	AFT	African taurine	Bos taurus	Modern
3136	Somba	SOMB	SOMB	SOMB07	AFT	African taurine	Bos taurus	Modern
3146	Somba	SOMB	SOMB	SOMB08	AFT	African taurine	Bos taurus	Modern
3168	Somba	SOMB	SOMB	SOMB09	AFT	African taurine	Bos taurus	Modern
3188	Somba	SOMB	SOMB	SOMB10	AFT	African taurine	Bos taurus	Modern
3195	Somba	SOMB	SOMB	SOMB11	AFT	African taurine	Bos taurus	Modern
32_Lagune	Lagune	LAGU	LAGU	LAGU35	AFT	African taurine	Bos taurus	Modern
3226	Somba	SOMB	SOMB	SOMB12	AFT	African taurine	Bos taurus	Modern
3232	Somba	SOMB	SOMB	SOMB13	AFT	African taurine	Bos taurus	Modern
3252	Somba	SOMB	SOMB	SOMB14	AFT	African taurine	Bos taurus	Modern
3261	Somba	SOMB	SOMB	SOMB15	AFT	African taurine	Bos taurus	Modern
3269	Somba	SOMB	SOMB	SOMB16	AFT	African taurine	Bos taurus	Modern
3284	Somba	SOMB	SOMB	SOMB17	AFT	African taurine	Bos taurus	Modern
3300	Somba	SOMB	SOMB	SOMB18	AFT	African taurine	Bos taurus	Modern
3320	Somba	SOMB	SOMB	SOMB19	AFT	African taurine	Bos taurus	Modern
3322	Somba	SOMB	SOMB	SOMB20	AFT	African taurine	Bos taurus	Modern
3324	Somba	SOMB	SOMB	SOMB21	AFT	African taurine	Bos taurus	Modern
3330	Somba	SOMB	SOMB	SOMB22	AFT	African taurine	Bos taurus	Modern
3346	Somba	SOMB	SOMB	SOMB23	AFT	African taurine	Bos taurus	Modern
3352	Somba	SOMB	SOMB	SOMB24	AFT	African taurine	Bos taurus	Modern
3356	Somba	SOMB	SOMB	SOMB25	AFT	African taurine	Bos taurus	Modern
3362	Somba	SOMB	SOMB	SOMB26	AFT	African taurine	Bos taurus	Modern
3364	Somba	SOMB	SOMB	SOMB27	AFT	African taurine	Bos taurus	Modern
3368	Somba	SOMB	SOMB	SOMB28	AFT	African taurine	Bos taurus	Modern
3372	Somba	SOMB	SOMB	SOMB29	AFT	African taurine	Bos taurus	Modern
3378	Somba	SOMB	SOMB	SOMB30	AFT	African taurine	Bos taurus	Modern
3386	Somba	SOMB	SOMB	SOMB31	AFT	African taurine	Bos taurus	Modern
34_Lagune	Lagune	LAGU	LAGU	LAGU36	AFT	African taurine	Bos taurus	Modern
3425	Somba	SOMB	SOMB	SOMB32	AFT	African taurine	Bos taurus	Modern
3437	Somba	SOMB	SOMB	SOMB33	AFT	African taurine	Bos taurus	Modern
3439	Somba	SOMB	SOMB	SOMB34	AFT	African taurine	Bos taurus	Modern
3449	Somba	SOMB	SOMB	SOMB35	AFT	African taurine	Bos taurus	Modern
3488	Somba	SOMB	SOMB	SOMB36	AFT	African taurine	Bos taurus	Modern
35_Lagune	Lagune	LAGU	LAGU	LAGU37	AFT	African taurine	Bos taurus	Modern
3500	Somba	SOMB	SOMB	SOMB37	AFT	African taurine	Bos taurus	Modern
3508	Somba	SOMB	SOMB	SOMB38	AFT	African taurine	Bos taurus	Modern
3596	Somba	SOMB	SOMB	SOMB39	AFT	African taurine	Bos taurus	Modern
36_Lagune	Lagune	LAGU	LAGU	LAGU38	AFT	African taurine	Bos taurus	Modern
3600	Somba	SOMB	SOMB	SOMB40	AFT	African taurine	Bos taurus	Modern
3610	Somba	SOMB	SOMB	SOMB61	AFT	African taurine	Bos taurus	Modern
3616	Somba	SOMB	SOMB	SOMB41	AFT	African taurine	Bos taurus	Modern
362	Nguni	NGUN	NGUN	NGUN14	AFS	African Sanga	Bos taurus/Bos indicus hybrid	Modern
3630	Somba	SOMB	SOMB	SOMB42	AFT	African taurine	Bos taurus	Modern
3639	Somba	SOMB	SOMB	SOMB43	AFT	African taurine	Bos taurus	Modern
3643	Somba	SOMB	SOMB	SOMB44	AFT	African taurine	Bos taurus	Modern
3649	Somba	SOMB	SOMB	SOMB45	AFT	African taurine	Bos taurus	Modern
3653	Somba	SOMB	SOMB	SOMB46	AFT	African taurine	Bos taurus	Modern
3657	Somba	SOMB	SOMB	SOMB47	AFT	African taurine	Bos taurus	Modern
3665	Somba	SOMB	SOMB	SOMB48	AFT	African taurine	Bos taurus	Modern
3675	Somba	SOMB	SOMB	SOMB49	AFT	African taurine	Bos taurus	Modern
3683	Somba	SOMB	SOMB	SOMB50	AFT	African taurine	Bos taurus	Modern
37_Lagune	Lagune	LAGU	LAGU	LAGU39	AFT	African taurine	Bos taurus	Modern
3705	Somba	SOMB	SOMB	SOMB51	AFT	African taurine	Bos taurus	Modern
3717	Somba	SOMB	SOMB	SOMB52	AFT	African taurine	Bos taurus	Modern
3725	Somba	SOMB	SOMB	SOMB53	AFT	African taurine	Bos taurus	Modern
3729	Somba	SOMB	SOMB	SOMB54	AFT	African taurine	Bos taurus	Modern
3739	Somba	SOMB	SOMB	SOMB55	AFT	African taurine	Bos taurus	Modern
38_Lagune	Lagune	LAGU	LAGU	LAGU40	AFT	African taurine	Bos taurus	Modern
39_Lagune	Lagune	LAGU	LAGU	LAGU41	AFT	African taurine	Bos taurus	Modern
4_Lagune	Lagune	LAGU	LAGU	LAGU08	AFT	African taurine	Bos taurus	Modern
40_Lagune	Lagune	LAGU	LAGU	LAGU42	AFT	African taurine	Bos taurus	Modern
4021	Afrikaner	AFRI	AFRI	AFRI08	AFS	African Sanga	Bos taurus/Bos indicus hybrid	Modern
41_Lagune	Lagune	LAGU	LAGU	LAGU43	AFT	African taurine	Bos taurus	Modern
42_Lagune	Lagune	LAGU	LAGU	LAGU44	AFT	African taurine	Bos taurus	Modern
43_Lagune	Lagune	LAGU	LAGU	LAGU45	AFT	African taurine	Bos taurus	Modern
44_Lagune	Lagune	LAGU	LAGU	LAGU46	AFT	African taurine	Bos taurus	Modern
45_Lagune	Lagune	LAGU	LAGU	LAGU47	AFT	African taurine	Bos taurus	Modern
46_Lagune	Lagune	LAGU	LAGU	LAGU48	AFT	African taurine	Bos taurus	Modern
47_Lagune	Lagune	LAGU	LAGU	LAGU49	AFT	African taurine	Bos taurus	Modern
48_Lagune	Lagune	LAGU	LAGU	LAGU50	AFT	African taurine	Bos taurus	Modern
49_Lagune	Lagune	LAGU	LAGU	LAGU51	AFT	African taurine	Bos taurus	Modern
5_Lagune	Lagune	LAGU	LAGU	LAGU09	AFT	African taurine	Bos taurus	Modern
50_Lagune	Lagune	LAGU	LAGU	LAGU52	AFT	African taurine	Bos taurus	Modern
5015	Afrikaner	AFRI	AFRI	AFRI09	AFS	African Sanga	Bos taurus/Bos indicus hybrid	Modern
5042	Tuli	TULI	TULI	TULI18	SAC	South African Composite	Bos taurus/Bos indicus hybrid	Modern
5049	Afrikaner	AFRI	AFRI	AFRI10	AFS	African Sanga	Bos taurus/Bos indicus hybrid	Modern
5058	Drakensberger	DRAK	DRAK	DRAK03	SAC	South African Composite	Bos taurus/Bos indicus hybrid	Modern
51_Kapsiki	Kapsiki	KAPS	KAPS	KAPS04	AFT	African taurine	Bos taurus	Modern
52_Kapsiki	Kapsiki	KAPS	KAPS	KAPS05	AFT	African taurine	Bos taurus	Modern
53_Kapsiki	Kapsiki	KAPS	KAPS	KAPS06	AFT	African taurine	Bos taurus	Modern
54_Kapsiki	Kapsiki	KAPS	KAPS	KAPS07	AFT	African taurine	Bos taurus	Modern
55_Kapsiki	Kapsiki	KAPS	KAPS	KAPS08	AFT	African taurine	Bos taurus	Modern
56_Kapsiki	Kapsiki	KAPS	KAPS	KAPS09	AFT	African taurine	Bos taurus	Modern
57_Kapsiki	Kapsiki	KAPS	KAPS	KAPS10	AFT	African taurine	Bos taurus	Modern
58_Kapsiki	Kapsiki	KAPS	KAPS	KAPS11	AFT	African taurine	Bos taurus	Modern
59_Kapsiki	Kapsiki	KAPS	KAPS	KAPS12	AFT	African taurine	Bos taurus	Modern
6_Lagune	Lagune	LAGU	LAGU	LAGU10	AFT	African taurine	Bos taurus	Modern
60_Kapsiki	Kapsiki	KAPS	KAPS	KAPS13	AFT	African taurine	Bos taurus	Modern
6052	Afrikaner	AFRI	AFRI	AFRI11	AFS	African Sanga	Bos taurus/Bos indicus hybrid	Modern
6066	Afrikaner	AFRI	AFRI	AFRI12	AFS	African Sanga	Bos taurus/Bos indicus hybrid	Modern
61_Kapsiki	Kapsiki	KAPS	KAPS	KAPS14	AFT	African taurine	Bos taurus	Modern
62_Kapsiki	Kapsiki	KAPS	KAPS	KAPS15	AFT	African taurine	Bos taurus	Modern
63_Kapsiki	Kapsiki	KAPS	KAPS	KAPS16	AFT	African taurine	Bos taurus	Modern
65_Kapsiki	Kapsiki	KAPS	KAPS	KAPS17	AFT	African taurine	Bos taurus	Modern
66_Kapsiki	Kapsiki	KAPS	KAPS	KAPS18	AFT	African taurine	Bos taurus	Modern
668	Nguni	NGUN	NGUN	NGUN15	AFS	African Sanga	Bos taurus/Bos indicus hybrid	Modern
67_Kapsiki	Kapsiki	KAPS	KAPS	KAPS19	AFT	African taurine	Bos taurus	Modern
68_Kapsiki	Kapsiki	KAPS	KAPS	KAPS20	AFT	African taurine	Bos taurus	Modern
69_Kapsiki	Kapsiki	KAPS	KAPS	KAPS21	AFT	African taurine	Bos taurus	Modern
7_Lagune	Lagune	LAGU	LAGU	LAGU11	AFT	African taurine	Bos taurus	Modern
70_Kapsiki	Kapsiki	KAPS	KAPS	KAPS22	AFT	African taurine	Bos taurus	Modern
71_Kapsiki	Kapsiki	KAPS	KAPS	KAPS23	AFT	African taurine	Bos taurus	Modern
7153	Nguni	NGUN	NGUN	NGUN17	AFS	African Sanga	Bos taurus/Bos indicus hybrid	Modern
72_Kapsiki	Kapsiki	KAPS	KAPS	KAPS24	AFT	African taurine	Bos taurus	Modern
7226	Nguni	NGUN	NGUN	NGUN18	AFS	African Sanga	Bos taurus/Bos indicus hybrid	Modern
73_Kapsiki	Kapsiki	KAPS	KAPS	KAPS25	AFT	African taurine	Bos taurus	Modern
74_Kapsiki	Kapsiki	KAPS	KAPS	KAPS26	AFT	African taurine	Bos taurus	Modern
75_Kapsiki	Kapsiki	KAPS	KAPS	KAPS27	AFT	African taurine	Bos taurus	Modern
76_Kapsiki	Kapsiki	KAPS	KAPS	KAPS28	AFT	African taurine	Bos taurus	Modern
77_Kapsiki	Kapsiki	KAPS	KAPS	KAPS29	AFT	African taurine	Bos taurus	Modern
78_Kapsiki	Kapsiki	KAPS	KAPS	KAPS30	AFT	African taurine	Bos taurus	Modern
79_Kapsiki	Kapsiki	KAPS	KAPS	KAPS31	AFT	African taurine	Bos taurus	Modern
8_Lagune	Lagune	LAGU	LAGU	LAGU12	AFT	African taurine	Bos taurus	Modern
80_Kapsiki	Kapsiki	KAPS	KAPS	KAPS32	AFT	African taurine	Bos taurus	Modern
8051	Bonsmara	BONS	BONS	BONS03	SAC	South African Composite	Bos taurus/Bos indicus hybrid	Modern
8070	Bonsmara	BONS	BONS	BONS04	SAC	South African Composite	Bos taurus/Bos indicus hybrid	Modern
81_Kapsiki	Kapsiki	KAPS	KAPS	KAPS33	AFT	African taurine	Bos taurus	Modern
8103	Bonsmara	BONS	BONS	BONS05	SAC	South African Composite	Bos taurus/Bos indicus hybrid	Modern
8137	Bonsmara	BONS	BONS	BONS06	SAC	South African Composite	Bos taurus/Bos indicus hybrid	Modern
82_Kapsiki	Kapsiki	KAPS	KAPS	KAPS34	AFT	African taurine	Bos taurus	Modern
83_Kapsiki	Kapsiki	KAPS	KAPS	KAPS35	AFT	African taurine	Bos taurus	Modern
84_Kapsiki	Kapsiki	KAPS	KAPS	KAPS36	AFT	African taurine	Bos taurus	Modern
85_Kapsiki	Kapsiki	KAPS	KAPS	KAPS37	AFT	African taurine	Bos taurus	Modern
86_Kapsiki	Kapsiki	KAPS	KAPS	KAPS38	AFT	African taurine	Bos taurus	Modern
87_Kapsiki	Kapsiki	KAPS	KAPS	KAPS39	AFT	African taurine	Bos taurus	Modern
876	Tuli	TULI	TULI	TULI10	SAC	South African Composite	Bos taurus/Bos indicus hybrid	Modern
879	Tuli	TULI	TULI	TULI11	SAC	South African Composite	Bos taurus/Bos indicus hybrid	Modern
88_Kapsiki	Kapsiki	KAPS	KAPS	KAPS40	AFT	African taurine	Bos taurus	Modern
89_Kapsiki	Kapsiki	KAPS	KAPS	KAPS41	AFT	African taurine	Bos taurus	Modern
9_Lagune	Lagune	LAGU	LAGU	LAGU13	AFT	African taurine	Bos taurus	Modern
90_Kapsiki	Kapsiki	KAPS	KAPS	KAPS42	AFT	African taurine	Bos taurus	Modern
91_Kapsiki	Kapsiki	KAPS	KAPS	KAPS43	AFT	African taurine	Bos taurus	Modern
9130	Bonsmara	BONS	BONS	BONS07	SAC	South African Composite	Bos taurus/Bos indicus hybrid	Modern
9181	Tuli	TULI	TULI	TULI19	SAC	South African Composite	Bos taurus/Bos indicus hybrid	Modern
92_Kapsiki	Kapsiki	KAPS	KAPS	KAPS44	AFT	African taurine	Bos taurus	Modern
93_Kapsiki	Kapsiki	KAPS	KAPS	KAPS45	AFT	African taurine	Bos taurus	Modern
94_Kapsiki	Kapsiki	KAPS	KAPS	KAPS46	AFT	African taurine	Bos taurus	Modern
95_Kapsiki	Kapsiki	KAPS	KAPS	KAPS47	AFT	African taurine	Bos taurus	Modern
96_Kapsiki	Kapsiki	KAPS	KAPS	KAPS48	AFT	African taurine	Bos taurus	Modern
AAD10033	Drakensberger	DRAK	DRAK	DRAK05	SAC	South African Composite	Bos taurus/Bos indicus hybrid	Modern
AAD11035	Drakensberger	DRAK	DRAK	DRAK06	SAC	South African Composite	Bos taurus/Bos indicus hybrid	Modern
AAD11055	Drakensberger	DRAK	DRAK	DRAK07	SAC	South African Composite	Bos taurus/Bos indicus hybrid	Modern
AAD11059	Drakensberger	DRAK	DRAK	DRAK08	SAC	South African Composite	Bos taurus/Bos indicus hybrid	Modern
ADM0651	Tuli	TULI	TULI	TULI23	SAC	South African Composite	Bos taurus/Bos indicus hybrid	Modern
Afrikaner10	Afrikaner	AFRI	AFRI	AFRI06	AFS	African Sanga	Bos taurus/Bos indicus hybrid	Modern
Afrikaner11	Afrikaner	AFRI	AFRI	AFRI07	AFS	African Sanga	Bos taurus/Bos indicus hybrid	Modern
Afrikaner5	Afrikaner	AFRI	AFRI	AFRI04	AFS	African Sanga	Bos taurus/Bos indicus hybrid	Modern
Afrikaner7	Afrikaner	AFRI	AFRI	AFRI05	AFS	African Sanga	Bos taurus/Bos indicus hybrid	Modern
ALQ061182	East_African_Short_Zebu	EASZ	EASZ	EASZ001	AZE	African Indicine Composite	Bos indicus	Modern
AM10057	Tuli	TULI	TULI	TULI24	SAC	South African Composite	Bos taurus/Bos indicus hybrid	Modern
AM11121	Tuli	TULI	TULI	TULI25	SAC	South African Composite	Bos taurus/Bos indicus hybrid	Modern
AM13017	Tuli	TULI	TULI	TULI26	SAC	South African Composite	Bos taurus/Bos indicus hybrid	Modern
AM15071	Tuli	TULI	TULI	TULI27	SAC	South African Composite	Bos taurus/Bos indicus hybrid	Modern
AM18066	Tuli	TULI	TULI	TULI28	SAC	South African Composite	Bos taurus/Bos indicus hybrid	Modern
AR13007	Tuli	TULI	TULI	TULI29	SAC	South African Composite	Bos taurus/Bos indicus hybrid	Modern
AR14004	Tuli	TULI	TULI	TULI30	SAC	South African Composite	Bos taurus/Bos indicus hybrid	Modern
B10	Namchi	NAMC	NAMC	NAMC11	AFT	African taurine	Bos taurus	Modern
B11	Namchi	NAMC	NAMC	NAMC12	AFT	African taurine	Bos taurus	Modern
B12	Namchi	NAMC	NAMC	NAMC13	AFT	African taurine	Bos taurus	Modern
B13	Namchi	NAMC	NAMC	NAMC14	AFT	African taurine	Bos taurus	Modern
B14	Namchi	NAMC	NAMC	NAMC15	AFT	African taurine	Bos taurus	Modern
B15	Namchi	NAMC	NAMC	NAMC16	AFT	African taurine	Bos taurus	Modern
B16	Namchi	NAMC	NAMC	NAMC17	AFT	African taurine	Bos taurus	Modern
B17	Namchi	NAMC	NAMC	NAMC18	AFT	African taurine	Bos taurus	Modern
B18	Namchi	NAMC	NAMC	NAMC19	AFT	African taurine	Bos taurus	Modern
B19	Namchi	NAMC	NAMC	NAMC20	AFT	African taurine	Bos taurus	Modern
B2	Namchi	NAMC	NAMC	NAMC04	AFT	African taurine	Bos taurus	Modern
B22	Namchi	NAMC	NAMC	NAMC21	AFT	African taurine	Bos taurus	Modern
B23	Namchi	NAMC	NAMC	NAMC22	AFT	African taurine	Bos taurus	Modern
B24	Namchi	NAMC	NAMC	NAMC23	AFT	African taurine	Bos taurus	Modern
B25	Namchi	NAMC	NAMC	NAMC24	AFT	African taurine	Bos taurus	Modern
B27	Namchi	NAMC	NAMC	NAMC25	AFT	African taurine	Bos taurus	Modern
B28	Namchi	NAMC	NAMC	NAMC26	AFT	African taurine	Bos taurus	Modern
B3	Namchi	NAMC	NAMC	NAMC05	AFT	African taurine	Bos taurus	Modern
B30	Namchi	NAMC	NAMC	NAMC27	AFT	African taurine	Bos taurus	Modern
B31	Namchi	NAMC	NAMC	NAMC28	AFT	African taurine	Bos taurus	Modern
B32	Namchi	NAMC	NAMC	NAMC29	AFT	African taurine	Bos taurus	Modern
B33	Namchi	NAMC	NAMC	NAMC30	AFT	African taurine	Bos taurus	Modern
B34	Namchi	NAMC	NAMC	NAMC31	AFT	African taurine	Bos taurus	Modern
B35	Namchi	NAMC	NAMC	NAMC32	AFT	African taurine	Bos taurus	Modern
B36	Namchi	NAMC	NAMC	NAMC33	AFT	African taurine	Bos taurus	Modern
B37	Namchi	NAMC	NAMC	NAMC34	AFT	African taurine	Bos taurus	Modern
B38	Namchi	NAMC	NAMC	NAMC35	AFT	African taurine	Bos taurus	Modern
B39	Namchi	NAMC	NAMC	NAMC36	AFT	African taurine	Bos taurus	Modern
B4	Namchi	NAMC	NAMC	NAMC06	AFT	African taurine	Bos taurus	Modern
B40	Namchi	NAMC	NAMC	NAMC37	AFT	African taurine	Bos taurus	Modern
B41	Namchi	NAMC	NAMC	NAMC38	AFT	African taurine	Bos taurus	Modern
B42	Namchi	NAMC	NAMC	NAMC39	AFT	African taurine	Bos taurus	Modern
B43	Namchi	NAMC	NAMC	NAMC40	AFT	African taurine	Bos taurus	Modern
B45	Namchi	NAMC	NAMC	NAMC41	AFT	African taurine	Bos taurus	Modern
B47	Namchi	NAMC	NAMC	NAMC42	AFT	African taurine	Bos taurus	Modern
B49	Namchi	NAMC	NAMC	NAMC43	AFT	African taurine	Bos taurus	Modern
B5	Namchi	NAMC	NAMC	NAMC07	AFT	African taurine	Bos taurus	Modern
B50	Namchi	NAMC	NAMC	NAMC44	AFT	African taurine	Bos taurus	Modern
B51	Namchi	NAMC	NAMC	NAMC45	AFT	African taurine	Bos taurus	Modern
B52	Namchi	NAMC	NAMC	NAMC46	AFT	African taurine	Bos taurus	Modern
B53	Namchi	NAMC	NAMC	NAMC47	AFT	African taurine	Bos taurus	Modern
B55	Namchi	NAMC	NAMC	NAMC48	AFT	African taurine	Bos taurus	Modern
B56	Namchi	NAMC	NAMC	NAMC49	AFT	African taurine	Bos taurus	Modern
B57	Namchi	NAMC	NAMC	NAMC50	AFT	African taurine	Bos taurus	Modern
B58	Namchi	NAMC	NAMC	NAMC51	AFT	African taurine	Bos taurus	Modern
B59	Namchi	NAMC	NAMC	NAMC52	AFT	African taurine	Bos taurus	Modern
B6	Namchi	NAMC	NAMC	NAMC08	AFT	African taurine	Bos taurus	Modern
B60	White_Fulani	WHIT	WHIT	WHIT04	AFS	African Sanga	Bos indicus	Modern
B7	Namchi	NAMC	NAMC	NAMC09	AFT	African taurine	Bos taurus	Modern
B9	Namchi	NAMC	NAMC	NAMC10	AFT	African taurine	Bos taurus	Modern
Barotse31	Barotse	BARO	BARO	BARO04	AFS	African Sanga	Bos taurus/Bos indicus hybrid	Modern
BBN100110	Bonsmara	BONS	BONS	BONS11	SAC	South African Composite	Bos taurus/Bos indicus hybrid	Modern
BC03	Baoule_IvoryCoast_1990s	BICT	BICT	BICT01	AFT	African taurine	Bos taurus	Modern
BC05	Baoule_IvoryCoast_1990s	BICT	BICT	BICT02	AFT	African taurine	Bos taurus	Modern
BC07	Baoule_IvoryCoast_1990s	BICT	BICT	BICT03	AFT	African taurine	Bos taurus	Modern
BC11	Baoule_IvoryCoast_1990s	BICT	BICT	BICT04	AFT	African taurine	Bos taurus	Modern
BC13	Baoule_IvoryCoast_1990s	BICT	BICT	BICT05	AFT	African taurine	Bos taurus	Modern
BC14	Baoule_IvoryCoast_1990s	BICT	BICT	BICT06	AFT	African taurine	Bos taurus	Modern
BC16	Baoule_IvoryCoast_1990s	BICT	BICT	BICT07	AFT	African taurine	Bos taurus	Modern
BC17	Baoule_IvoryCoast_1990s	BICT	BICT	BICT08	AFT	African taurine	Bos taurus	Modern
BC19	Baoule_IvoryCoast_1990s	BICT	BICT	BICT09	AFT	African taurine	Bos taurus	Modern
BC21	Baoule_IvoryCoast_1990s	BICT	BICT	BICT10	AFT	African taurine	Bos taurus	Modern
BC23	Baoule_IvoryCoast_1990s	BICT	BICT	BICT11	AFT	African taurine	Bos taurus	Modern
BC25	Baoule_IvoryCoast_1990s	BICT	BICT	BICT12	AFT	African taurine	Bos taurus	Modern
BC27	Baoule_IvoryCoast_1990s	BICT	BICT	BICT13	AFT	African taurine	Bos taurus	Modern
BC29	Baoule_IvoryCoast_1990s	BICT	BICT	BICT14	AFT	African taurine	Bos taurus	Modern
BC33	Baoule_IvoryCoast_1990s	BICT	BICT	BICT15	AFT	African taurine	Bos taurus	Modern
BC34	Baoule_IvoryCoast_1990s	BICT	BICT	BICT16	AFT	African taurine	Bos taurus	Modern
BC36	Baoule_IvoryCoast_1990s	BICT	BICT	BICT17	AFT	African taurine	Bos taurus	Modern
BC37	Baoule_IvoryCoast_1990s	BICT	BICT	BICT18	AFT	African taurine	Bos taurus	Modern
BC39	Baoule_IvoryCoast_1990s	BICT	BICT	BICT19	AFT	African taurine	Bos taurus	Modern
BC41	Baoule_IvoryCoast_1990s	BICT	BICT	BICT20	AFT	African taurine	Bos taurus	Modern
BC43	Baoule_IvoryCoast_1990s	BICT	BICT	BICT21	AFT	African taurine	Bos taurus	Modern
BC45	Baoule_IvoryCoast_1990s	BICT	BICT	BICT22	AFT	African taurine	Bos taurus	Modern
BC47	Baoule_IvoryCoast_1990s	BICT	BICT	BICT23	AFT	African taurine	Bos taurus	Modern
BG02	Baoule_BurkinaFaso_1990s	BBFT	BBFT	BBFT25	AFT	African taurine	Bos taurus	Modern
BG04	Baoule_BurkinaFaso_1990s	BBFT	BBFT	BBFT01	AFT	African taurine	Bos taurus	Modern
BG06	Baoule_BurkinaFaso_1990s	BBFT	BBFT	BBFT02	AFT	African taurine	Bos taurus	Modern
BG08	Baoule_BurkinaFaso_1990s	BBFT	BBFT	BBFT03	AFT	African taurine	Bos taurus	Modern
BG10	Baoule_BurkinaFaso_1990s	BBFT	BBFT	BBFT04	AFT	African taurine	Bos taurus	Modern
BG12	Baoule_BurkinaFaso_1990s	BBFT	BBFT	BBFT05	AFT	African taurine	Bos taurus	Modern
BG12062	Bonsmara	BONS	BONS	BONS12	SAC	South African Composite	Bos taurus/Bos indicus hybrid	Modern
BG12106	Bonsmara	BONS	BONS	BONS13	SAC	South African Composite	Bos taurus/Bos indicus hybrid	Modern
BG13116	Bonsmara	BONS	BONS	BONS14	SAC	South African Composite	Bos taurus/Bos indicus hybrid	Modern
BG14	Baoule_BurkinaFaso_1990s	BBFT	BBFT	BBFT06	AFT	African taurine	Bos taurus	Modern
BG16	Baoule_BurkinaFaso_1990s	BBFT	BBFT	BBFT07	AFT	African taurine	Bos taurus	Modern
BG18	Baoule_BurkinaFaso_1990s	BBFT	BBFT	BBFT08	AFT	African taurine	Bos taurus	Modern
BG20	Baoule_BurkinaFaso_1990s	BBFT	BBFT	BBFT09	AFT	African taurine	Bos taurus	Modern
BG22	Baoule_BurkinaFaso_1990s	BBFT	BBFT	BBFT10	AFT	African taurine	Bos taurus	Modern
BG24	Baoule_BurkinaFaso_1990s	BBFT	BBFT	BBFT11	AFT	African taurine	Bos taurus	Modern
BG26	Baoule_BurkinaFaso_1990s	BBFT	BBFT	BBFT12	AFT	African taurine	Bos taurus	Modern
BG28	Baoule_BurkinaFaso_1990s	BBFT	BBFT	BBFT13	AFT	African taurine	Bos taurus	Modern
BG30	Baoule_BurkinaFaso_1990s	BBFT	BBFT	BBFT14	AFT	African taurine	Bos taurus	Modern
BG32	Baoule_BurkinaFaso_1990s	BBFT	BBFT	BBFT15	AFT	African taurine	Bos taurus	Modern
BG34	Baoule_BurkinaFaso_1990s	BBFT	BBFT	BBFT16	AFT	African taurine	Bos taurus	Modern
BG36	Baoule_BurkinaFaso_1990s	BBFT	BBFT	BBFT17	AFT	African taurine	Bos taurus	Modern
BG38	Baoule_BurkinaFaso_1990s	BBFT	BBFT	BBFT18	AFT	African taurine	Bos taurus	Modern
BG40	Baoule_BurkinaFaso_1990s	BBFT	BBFT	BBFT19	AFT	African taurine	Bos taurus	Modern
BG42	Baoule_BurkinaFaso_1990s	BBFT	BBFT	BBFT20	AFT	African taurine	Bos taurus	Modern
BG44	Baoule_BurkinaFaso_1990s	BBFT	BBFT	BBFT21	AFT	African taurine	Bos taurus	Modern
BG46	Baoule_BurkinaFaso_1990s	BBFT	BBFT	BBFT22	AFT	African taurine	Bos taurus	Modern
BG48	Baoule_BurkinaFaso_1990s	BBFT	BBFT	BBFT23	AFT	African taurine	Bos taurus	Modern
BG50	Baoule_BurkinaFaso_1990s	BBFT	BBFT	BBFT24	AFT	African taurine	Bos taurus	Modern
BH11104	Drakensberger	DRAK	DRAK	DRAK09	SAC	South African Composite	Bos taurus/Bos indicus hybrid	Modern
BH11120	Drakensberger	DRAK	DRAK	DRAK10	SAC	South African Composite	Bos taurus/Bos indicus hybrid	Modern
BH14142	Bonsmara	BONS	BONS	BONS15	SAC	South African Composite	Bos taurus/Bos indicus hybrid	Modern
BJ11020	Drakensberger	DRAK	DRAK	DRAK11	SAC	South African Composite	Bos taurus/Bos indicus hybrid	Modern
BJ14068	Drakensberger	DRAK	DRAK	DRAK12	SAC	South African Composite	Bos taurus/Bos indicus hybrid	Modern
BJ18086	Drakensberger	DRAK	DRAK	DRAK13	SAC	South African Composite	Bos taurus/Bos indicus hybrid	Modern
BJ19064	Drakensberger	DRAK	DRAK	DRAK14	SAC	South African Composite	Bos taurus/Bos indicus hybrid	Modern
BJ19092	Drakensberger	DRAK	DRAK	DRAK15	SAC	South African Composite	Bos taurus/Bos indicus hybrid	Modern
Blonde12	Blonde	BLON	BLON	BLON06	NAT	North African taurine	Bos taurus	Modern
Blonde3	Blonde	BLON	BLON	BLON04	NAT	North African taurine	Bos taurus	Modern
Blonde6	Blonde	BLON	BLON	BLON05	NAT	North African taurine	Bos taurus	Modern
BN06635	Nguni	NGUN	NGUN	NGUN22	AFS	African Sanga	Bos taurus/Bos indicus hybrid	Modern
BN0958	Nguni	NGUN	NGUN	NGUN21	AFS	African Sanga	Bos taurus/Bos indicus hybrid	Modern
Bootse2	Bootse	BOOT	BOOT	BOOT04	AFS	African Sanga	Bos taurus/Bos indicus hybrid	Modern
BR10	Holstein	HOLS	HOLS	HOLS009	EUT	European taurine	Bos taurus	Modern
BR12	Boran	BORA	BORA	BORA01	AFI	African Indicine	Bos indicus	Modern
BR13	Boran	BORA	BORA	BORA02	AFI	African Indicine	Bos indicus	Modern
BR14	Boran	BORA	BORA	BORA03	AFI	African Indicine	Bos indicus	Modern
BR15	Boran	BORA	BORA	BORA04	AFI	African Indicine	Bos indicus	Modern
BR16	Boran	BORA	BORA	BORA05	AFI	African Indicine	Bos indicus	Modern
BR2	Holstein	HOLS	HOLS	HOLS001	EUT	European taurine	Bos taurus	Modern
BR3	Holstein	HOLS	HOLS	HOLS002	EUT	European taurine	Bos taurus	Modern
BR4	Holstein	HOLS	HOLS	HOLS003	EUT	European taurine	Bos taurus	Modern
BR5	Holstein	HOLS	HOLS	HOLS004	EUT	European taurine	Bos taurus	Modern
BR6	Holstein	HOLS	HOLS	HOLS005	EUT	European taurine	Bos taurus	Modern
BR7	Holstein	HOLS	HOLS	HOLS006	EUT	European taurine	Bos taurus	Modern
BR8	Holstein	HOLS	HOLS	HOLS007	EUT	European taurine	Bos taurus	Modern
BR9	Holstein	HOLS	HOLS	HOLS008	EUT	European taurine	Bos taurus	Modern
BSR057622	East_African_Short_Zebu	EASZ	EASZ	EASZ002	AZE	African Indicine Composite	Bos indicus	Modern
BSR058572	East_African_Short_Zebu	EASZ	EASZ	EASZ003	AZE	African Indicine Composite	Bos indicus	Modern
BSR058612	East_African_Short_Zebu	EASZ	EASZ	EASZ004	AZE	African Indicine Composite	Bos indicus	Modern
BUT10c	Butana	BUTA	BUTA	BUTA28	AFI	African Indicine	Bos indicus	Modern
BUT11b	Butana	BUTA	BUTA	BUTA29	AFI	African Indicine	Bos indicus	Modern
BUT13	Butana	BUTA	BUTA	BUTA30	AFI	African Indicine	Bos indicus	Modern
BUT14	Butana	BUTA	BUTA	BUTA31	AFI	African Indicine	Bos indicus	Modern
BUT15	Butana	BUTA	BUTA	BUTA32	AFI	African Indicine	Bos indicus	Modern
BUT16	Butana	BUTA	BUTA	BUTA33	AFI	African Indicine	Bos indicus	Modern
BUT17	Butana	BUTA	BUTA	BUTA34	AFI	African Indicine	Bos indicus	Modern
BUT18	Butana	BUTA	BUTA	BUTA35	AFI	African Indicine	Bos indicus	Modern
BUT1c	Butana	BUTA	BUTA	BUTA21	AFI	African Indicine	Bos indicus	Modern
BUT21	Butana	BUTA	BUTA	BUTA36	AFI	African Indicine	Bos indicus	Modern
BUT22	Butana	BUTA	BUTA	BUTA37	AFI	African Indicine	Bos indicus	Modern
BUT23	Butana	BUTA	BUTA	BUTA38	AFI	African Indicine	Bos indicus	Modern
BUT24	Butana	BUTA	BUTA	BUTA39	AFI	African Indicine	Bos indicus	Modern
BUT25	Butana	BUTA	BUTA	BUTA40	AFI	African Indicine	Bos indicus	Modern
BUT26	Butana	BUTA	BUTA	BUTA41	AFI	African Indicine	Bos indicus	Modern
BUT2c	Butana	BUTA	BUTA	BUTA22	AFI	African Indicine	Bos indicus	Modern
BUT34	Butana	BUTA	BUTA	BUTA42	AFI	African Indicine	Bos indicus	Modern
BUT4d	Butana	BUTA	BUTA	BUTA23	AFI	African Indicine	Bos indicus	Modern
BUT5c	Butana	BUTA	BUTA	BUTA24	AFI	African Indicine	Bos indicus	Modern
BUT6c	Butana	BUTA	BUTA	BUTA25	AFI	African Indicine	Bos indicus	Modern
BUT8b	Butana	BUTA	BUTA	BUTA26	AFI	African Indicine	Bos indicus	Modern
BUT9c	Butana	BUTA	BUTA	BUTA27	AFI	African Indicine	Bos indicus	Modern
BV090502	Drakensberger	DRAK	DRAK	DRAK16	SAC	South African Composite	Bos taurus/Bos indicus hybrid	Modern
BV110571	Drakensberger	DRAK	DRAK	DRAK17	SAC	South African Composite	Bos taurus/Bos indicus hybrid	Modern
BV110614	Drakensberger	DRAK	DRAK	DRAK18	SAC	South African Composite	Bos taurus/Bos indicus hybrid	Modern
BV140244	Drakensberger	DRAK	DRAK	DRAK19	SAC	South African Composite	Bos taurus/Bos indicus hybrid	Modern
CB10168	Drakensberger	DRAK	DRAK	DRAK20	SAC	South African Composite	Bos taurus/Bos indicus hybrid	Modern
CHK10025	Tuli	TULI	TULI	TULI31	SAC	South African Composite	Bos taurus/Bos indicus hybrid	Modern
CHK11064	Tuli	TULI	TULI	TULI32	SAC	South African Composite	Bos taurus/Bos indicus hybrid	Modern
CHK11095	Tuli	TULI	TULI	TULI33	SAC	South African Composite	Bos taurus/Bos indicus hybrid	Modern
CHK11179	Tuli	TULI	TULI	TULI34	SAC	South African Composite	Bos taurus/Bos indicus hybrid	Modern
CL07014	Drakensberger	DRAK	DRAK	DRAK21	SAC	South African Composite	Bos taurus/Bos indicus hybrid	Modern
CL10013	Drakensberger	DRAK	DRAK	DRAK22	SAC	South African Composite	Bos taurus/Bos indicus hybrid	Modern
CL12009	Drakensberger	DRAK	DRAK	DRAK23	SAC	South African Composite	Bos taurus/Bos indicus hybrid	Modern
CL13013	Drakensberger	DRAK	DRAK	DRAK24	SAC	South African Composite	Bos taurus/Bos indicus hybrid	Modern
CL16006	Drakensberger	DRAK	DRAK	DRAK25	SAC	South African Composite	Bos taurus/Bos indicus hybrid	Modern
CM10837R	Afrikaner	AFRI	AFRI	AFRI13	AFS	African Sanga	Bos taurus/Bos indicus hybrid	Modern
CNS0014601	Gabrali	GABR	GABR	GABR01	ASI	Indicine	Bos indicus	Modern
CNS0014603	Bhagnari	BHAG	BHAG	BHAG01	ASI	Indicine	Bos indicus	Modern
CNS0014604	Cholistani	CHOL	CHOL	CHOL01	ASI	Indicine	Bos indicus	Modern
CNS0014605	Bhagnari	BHAG	BHAG	BHAG02	ASI	Indicine	Bos indicus	Modern
CNS0014606	Bhagnari	BHAG	BHAG	BHAG03	ASI	Indicine	Bos indicus	Modern
CNS0014607	Dhanni	DHAN	DHAN	DHAN01	ASI	Indicine	Bos indicus	Modern
CNS0014609	Gabrali	GABR	GABR	GABR02	ASI	Indicine	Bos indicus	Modern
CNS0014610	Achai	ACHA	ACHA	ACHA01	ASI	Indicine	Bos indicus	Modern
CNS0014611	Dajal	DAJA	DAJA	DAJA01	ASI	Indicine	Bos indicus	Modern
CNS0014612	Hariana	HARI	HARI	HARI01	ASI	Indicine	Bos indicus	Modern
CNS0014614	Hariana	HARI	HARI	HARI02	ASI	Indicine	Bos indicus	Modern
CNS0014615	Achai	ACHA	ACHA	ACHA02	ASI	Indicine	Bos indicus	Modern
CNS0014618	Dhanni	DHAN	DHAN	DHAN02	ASI	Indicine	Bos indicus	Modern
CNS0014619	Red_Sindhi	REDS	REDS	REDS01	ASI	Indicine	Bos indicus	Modern
Corriente_900	Corriente	CORR	CORR	CORR01	EUT	European taurine	Bos taurus	Modern
CR07041	Tuli	TULI	TULI	TULI35	SAC	South African Composite	Bos taurus/Bos indicus hybrid	Modern
CR07111	Tuli	TULI	TULI	TULI36	SAC	South African Composite	Bos taurus/Bos indicus hybrid	Modern
CR08096	Tuli	TULI	TULI	TULI37	SAC	South African Composite	Bos taurus/Bos indicus hybrid	Modern
CR09029	Tuli	TULI	TULI	TULI38	SAC	South African Composite	Bos taurus/Bos indicus hybrid	Modern
CR18048	Tuli	TULI	TULI	TULI39	SAC	South African Composite	Bos taurus/Bos indicus hybrid	Modern
CRR193989	Tibetan_bos_indicus	TIBI	TIBI	TIBI01	ASI	Indicine	Bos indicus	Modern
CRR193990	Tibetan_bos_indicus	TIBI	TIBI	TIBI02	ASI	Indicine	Bos indicus	Modern
CRR193991	Tibetan_bos_indicus	TIBI	TIBI	TIBI03	ASI	Indicine	Bos indicus	Modern
CRR193992	Tibetan_bos_indicus	TIBI	TIBI	TIBI04	ASI	Indicine	Bos indicus	Modern
DC09930	Afrikaner	AFRI	AFRI	AFRI14	AFS	African Sanga	Bos taurus/Bos indicus hybrid	Modern
DC09988	Afrikaner	AFRI	AFRI	AFRI15	AFS	African Sanga	Bos taurus/Bos indicus hybrid	Modern
DC11129	Afrikaner	AFRI	AFRI	AFRI16	AFS	African Sanga	Bos taurus/Bos indicus hybrid	Modern
DC14427	Afrikaner	AFRI	AFRI	AFRI17	AFS	African Sanga	Bos taurus/Bos indicus hybrid	Modern
DC14447	Afrikaner	AFRI	AFRI	AFRI18	AFS	African Sanga	Bos taurus/Bos indicus hybrid	Modern
DC170726	Afrikaner	AFRI	AFRI	AFRI19	AFS	African Sanga	Bos taurus/Bos indicus hybrid	Modern
Dj01	Djakkore_SouthSenegal_1990s	DJSS	DJSS	DJSS01	AFT	African taurine	Bos taurus/Bos indicus hybrid	Modern
Dj03	Djakkore_SouthSenegal_1990s	DJSS	DJSS	DJSS02	AFT	African taurine	Bos taurus/Bos indicus hybrid	Modern
Dj05	Djakkore_SouthSenegal_1990s	DJSS	DJSS	DJSS03	AFT	African taurine	Bos taurus/Bos indicus hybrid	Modern
Dj07	Djakkore_SouthSenegal_1990s	DJSS	DJSS	DJSS04	AFT	African taurine	Bos taurus/Bos indicus hybrid	Modern
Dj09	Djakkore_SouthSenegal_1990s	DJSS	DJSS	DJSS05	AFT	African taurine	Bos taurus/Bos indicus hybrid	Modern
Dj11	Djakkore_SouthSenegal_1990s	DJSS	DJSS	DJSS06	AFT	African taurine	Bos taurus/Bos indicus hybrid	Modern
Dj12	Djakkore_SouthSenegal_1990s	DJSS	DJSS	DJSS07	AFT	African taurine	Bos taurus/Bos indicus hybrid	Modern
Dj14	Djakkore_SouthSenegal_1990s	DJSS	DJSS	DJSS08	AFT	African taurine	Bos taurus/Bos indicus hybrid	Modern
Dj16	Djakkore_SouthSenegal_1990s	DJSS	DJSS	DJSS09	AFT	African taurine	Bos taurus/Bos indicus hybrid	Modern
Dj20	Djakkore_SouthSenegal_1990s	DJSS	DJSS	DJSS10	AFT	African taurine	Bos taurus/Bos indicus hybrid	Modern
Dj21	Djakkore_SouthSenegal_1990s	DJSS	DJSS	DJSS11	AFT	African taurine	Bos taurus/Bos indicus hybrid	Modern
Dj28	Djakkore_SouthSenegal_1990s	DJSS	DJSS	DJSS12	AFT	African taurine	Bos taurus/Bos indicus hybrid	Modern
Dj32	Djakkore_SouthSenegal_1990s	DJSS	DJSS	DJSS13	AFT	African taurine	Bos taurus/Bos indicus hybrid	Modern
Dj34	Djakkore_SouthSenegal_1990s	DJSS	DJSS	DJSS14	AFT	African taurine	Bos taurus/Bos indicus hybrid	Modern
Dj46	Djakkore_SouthSenegal_1990s	DJSS	DJSS	DJSS15	AFT	African taurine	Bos taurus/Bos indicus hybrid	Modern
Dj47	Djakkore_SouthSenegal_1990s	DJSS	DJSS	DJSS16	AFT	African taurine	Bos taurus/Bos indicus hybrid	Modern
Dj48	Djakkore_SouthSenegal_1990s	DJSS	DJSS	DJSS17	AFT	African taurine	Bos taurus/Bos indicus hybrid	Modern
Dj49	Djakkore_SouthSenegal_1990s	DJSS	DJSS	DJSS18	AFT	African taurine	Bos taurus/Bos indicus hybrid	Modern
Dj50	Djakkore_SouthSenegal_1990s	DJSS	DJSS	DJSS19	AFT	African taurine	Bos taurus/Bos indicus hybrid	Modern
Dj51	Djakkore_SouthSenegal_1990s	DJSS	DJSS	DJSS20	AFT	African taurine	Bos taurus/Bos indicus hybrid	Modern
Dj52	Djakkore_SouthSenegal_1990s	DJSS	DJSS	DJSS21	AFT	African taurine	Bos taurus/Bos indicus hybrid	Modern
Dj53	Djakkore_SouthSenegal_1990s	DJSS	DJSS	DJSS22	AFT	African taurine	Bos taurus/Bos indicus hybrid	Modern
Dj58	Djakkore_SouthSenegal_1990s	DJSS	DJSS	DJSS23	AFT	African taurine	Bos taurus/Bos indicus hybrid	Modern
Dj60	Djakkore_SouthSenegal_1990s	DJSS	DJSS	DJSS24	AFT	African taurine	Bos taurus/Bos indicus hybrid	Modern
Dk06	Djakkore_Kolda_1990s	DJKT	DJKT	DJKT01	AFT	African taurine	Bos taurus/Bos indicus hybrid	Modern
Dk08	Djakkore_Kolda_1990s	DJKT	DJKT	DJKT02	AFT	African taurine	Bos taurus/Bos indicus hybrid	Modern
Dk09	Djakkore_Kolda_1990s	DJKT	DJKT	DJKT03	AFT	African taurine	Bos taurus/Bos indicus hybrid	Modern
Dk10	Djakkore_Kolda_1990s	DJKT	DJKT	DJKT04	AFT	African taurine	Bos taurus/Bos indicus hybrid	Modern
Dk11	Djakkore_Kolda_1990s	DJKT	DJKT	DJKT05	AFT	African taurine	Bos taurus/Bos indicus hybrid	Modern
Dk12	Djakkore_Kolda_1990s	DJKT	DJKT	DJKT06	AFT	African taurine	Bos taurus/Bos indicus hybrid	Modern
Dk13	Djakkore_Kolda_1990s	DJKT	DJKT	DJKT07	AFT	African taurine	Bos taurus/Bos indicus hybrid	Modern
Dk14	Djakkore_Kolda_1990s	DJKT	DJKT	DJKT08	AFT	African taurine	Bos taurus/Bos indicus hybrid	Modern
Dk15	Djakkore_Kolda_1990s	DJKT	DJKT	DJKT09	AFT	African taurine	Bos taurus/Bos indicus hybrid	Modern
Dk16	Djakkore_Kolda_1990s	DJKT	DJKT	DJKT10	AFT	African taurine	Bos taurus/Bos indicus hybrid	Modern
Dk17	Djakkore_Kolda_1990s	DJKT	DJKT	DJKT11	AFT	African taurine	Bos taurus/Bos indicus hybrid	Modern
Dk18	Djakkore_Kolda_1990s	DJKT	DJKT	DJKT12	AFT	African taurine	Bos taurus/Bos indicus hybrid	Modern
Dk19	Djakkore_Kolda_1990s	DJKT	DJKT	DJKT13	AFT	African taurine	Bos taurus/Bos indicus hybrid	Modern
Dk20	Djakkore_Kolda_1990s	DJKT	DJKT	DJKT14	AFT	African taurine	Bos taurus/Bos indicus hybrid	Modern
Dk21	Djakkore_Kolda_1990s	DJKT	DJKT	DJKT15	AFT	African taurine	Bos taurus/Bos indicus hybrid	Modern
Dk22	Djakkore_Kolda_1990s	DJKT	DJKT	DJKT16	AFT	African taurine	Bos taurus/Bos indicus hybrid	Modern
Dk24	Djakkore_Kolda_1990s	DJKT	DJKT	DJKT17	AFT	African taurine	Bos taurus/Bos indicus hybrid	Modern
Dk25	Djakkore_Kolda_1990s	DJKT	DJKT	DJKT18	AFT	African taurine	Bos taurus/Bos indicus hybrid	Modern
Dk26	Djakkore_Kolda_1990s	DJKT	DJKT	DJKT19	AFT	African taurine	Bos taurus/Bos indicus hybrid	Modern
Dk27	Djakkore_Kolda_1990s	DJKT	DJKT	DJKT20	AFT	African taurine	Bos taurus/Bos indicus hybrid	Modern
Dk28	Djakkore_Kolda_1990s	DJKT	DJKT	DJKT21	AFT	African taurine	Bos taurus/Bos indicus hybrid	Modern
Dk29	Djakkore_Kolda_1990s	DJKT	DJKT	DJKT22	AFT	African taurine	Bos taurus/Bos indicus hybrid	Modern
DKH16348	Tuli	TULI	TULI	TULI40	SAC	South African Composite	Bos taurus/Bos indicus hybrid	Modern
DN12	Danakil	DANA	DANA	DANA06	AFI	African Indicine	Bos taurus/Bos indicus hybrid	Modern
DN15	Danakil	DANA	DANA	DANA07	AFI	African Indicine	Bos taurus/Bos indicus hybrid	Modern
DN16	Danakil	DANA	DANA	DANA08	AFI	African Indicine	Bos taurus/Bos indicus hybrid	Modern
DN18	Danakil	DANA	DANA	DANA09	AFI	African Indicine	Bos taurus/Bos indicus hybrid	Modern
DN2	Danakil	DANA	DANA	DANA04	AFI	African Indicine	Bos taurus/Bos indicus hybrid	Modern
DN22	Danakil	DANA	DANA	DANA10	AFI	African Indicine	Bos taurus/Bos indicus hybrid	Modern
DN26	Danakil	DANA	DANA	DANA11	AFI	African Indicine	Bos taurus/Bos indicus hybrid	Modern
DN27	Danakil	DANA	DANA	DANA12	AFI	African Indicine	Bos taurus/Bos indicus hybrid	Modern
DN32	Danakil	DANA	DANA	DANA13	AFI	African Indicine	Bos taurus/Bos indicus hybrid	Modern
DN33	Danakil	DANA	DANA	DANA14	AFI	African Indicine	Bos taurus/Bos indicus hybrid	Modern
DN34	Danakil	DANA	DANA	DANA15	AFI	African Indicine	Bos taurus/Bos indicus hybrid	Modern
DN35	Danakil	DANA	DANA	DANA16	AFI	African Indicine	Bos taurus/Bos indicus hybrid	Modern
DN6	Danakil	DANA	DANA	DANA05	AFI	African Indicine	Bos taurus/Bos indicus hybrid	Modern
DPN13115	Nguni	NGUN	NGUN	NGUN23	AFS	African Sanga	Bos taurus/Bos indicus hybrid	Modern
DPN14016	Nguni	NGUN	NGUN	NGUN24	AFS	African Sanga	Bos taurus/Bos indicus hybrid	Modern
DPN14034	Nguni	NGUN	NGUN	NGUN25	AFS	African Sanga	Bos taurus/Bos indicus hybrid	Modern
DPN14059	Nguni	NGUN	NGUN	NGUN26	AFS	African Sanga	Bos taurus/Bos indicus hybrid	Modern
DubLowPass10_4	Arado	ARDT	ARAD	ARAD03	AFI	African Indicine	Bos taurus/Bos indicus hybrid	Modern
DubLowPass10_5	Arado	ARDT	ARAD	ARAD04	AFI	African Indicine	Bos taurus/Bos indicus hybrid	Modern
DubLowPass10_6	Arado	ARDT	ARAD	ARAD05	AFI	African Indicine	Bos taurus/Bos indicus hybrid	Modern
DubLowPass10_7	Arado	ARDT	ARAD	ARAD06	AFI	African Indicine	Bos taurus/Bos indicus hybrid	Modern
DubLowPass10_8	Arado	ARDT	ARAD	ARAD07	AFI	African Indicine	Bos taurus/Bos indicus hybrid	Modern
DubLowPass10_9	Arado	ARDT	ARAD	ARAD08	AFI	African Indicine	Bos taurus/Bos indicus hybrid	Modern
ELSB	Elsenburg	ELSB	ELSB	ELSB	ELSB	Ancient cattle	ancient Bos taurus	Ancient
ERR12035105	Blanco_Orejinegro	BLAN	BLAN	BLAN01	EUT	European taurine	Bos taurus	Modern
ERR12035106	Blanco_Orejinegro	BLAN	BLAN	BLAN02	EUT	European taurine	Bos taurus	Modern
ERR12035107	Blanco_Orejinegro	BLAN	BLAN	BLAN03	EUT	European taurine	Bos taurus	Modern
ERR12035108	Blanco_Orejinegro	BLAN	BLAN	BLAN04	EUT	European taurine	Bos taurus	Modern
ERR12035109	Blanco_Orejinegro	BLAN	BLAN	BLAN05	EUT	European taurine	Bos taurus	Modern
ERR12035110	Blanco_Orejinegro	BLAN	BLAN	BLAN06	EUT	European taurine	Bos taurus	Modern
ERR12035111	Blanco_Orejinegro	BLAN	BLAN	BLAN07	EUT	European taurine	Bos taurus	Modern
ERR12035112	Blanco_Orejinegro	BLAN	BLAN	BLAN08	EUT	European taurine	Bos taurus	Modern
ERR12035113	Blanco_Orejinegro	BLAN	BLAN	BLAN09	EUT	European taurine	Bos taurus	Modern
ERR12035114	Blanco_Orejinegro	BLAN	BLAN	BLAN10	EUT	European taurine	Bos taurus	Modern
ERR12035115	Purebred_Limonero	LIMN	LIMN	LIMN14	EUT	European taurine	Bos taurus	Modern
ERR12035117	Purebred_Limonero	LIMN	LIMN	LIMN15	EUT	European taurine	Bos taurus	Modern
ERR12035119	Purebred_Limonero	LIMN	LIMN	LIMN16	EUT	European taurine	Bos taurus	Modern
ERR12035121	Purebred_Limonero	LIMN	LIMN	LIMN17	EUT	European taurine	Bos taurus	Modern
ERR12035123	Harton	HART	HART	HART01	EUT	European taurine	Bos taurus	Modern
ERR12035125	Purebred_Limonero	LIMN	LIMN	LIMN18	EUT	European taurine	Bos taurus	Modern
ERR12035127	Harton	HART	HART	HART02	EUT	European taurine	Bos taurus	Modern
ERR12035129	Harton	HART	HART	HART03	EUT	European taurine	Bos taurus	Modern
ERR12035131	Harton_x_Carora	HART	HART	HART06	EUT	European taurine	Bos taurus	Modern
ERR12035134	Purebred_Limonero	LIMN	LIMN	LIMN20	EUT	European taurine	Bos taurus	Modern
ERR12035135	Purebred_Limonero	LIMN	LIMN	LIMN21	EUT	European taurine	Bos taurus	Modern
ERR12035137	Harton	HART	HART	HART04	EUT	European taurine	Bos taurus	Modern
ERR12035139	Purebred_Limonero	LIMN	LIMN	LIMN22	EUT	European taurine	Bos taurus	Modern
ERR12035141	Purebred_Limonero	LIMN	LIMN	LIMN23	EUT	European taurine	Bos taurus	Modern
ERR12035143	Limonero	LIMN	LIMN	LIMN01	EUT	European taurine	Bos taurus	Modern
ERR12035145	Limonero_x_Senepol	LIMN	LIMN	LIMN12	EUT	European taurine	Bos taurus	Modern
ERR12035147	Limonero	LIMN	LIMN	LIMN02	EUT	European taurine	Bos taurus	Modern
ERR12035149	Purebred_Limonero	LIMN	LIMN	LIMN24	EUT	European taurine	Bos taurus	Modern
ERR12035151	Limonero_x_Senepol	LIMN	LIMN	LIMN13	EUT	European taurine	Bos taurus	Modern
ERR12035153	Purebred_Limonero	LIMN	LIMN	LIMN25	EUT	European taurine	Bos taurus	Modern
ERR12035155	Purebred_Limonero	LIMN	LIMN	LIMN26	EUT	European taurine	Bos taurus	Modern
ERR12035157	Purebred_Limonero	LIMN	LIMN	LIMN27	EUT	European taurine	Bos taurus	Modern
ERR12035159	Purebred_Limonero	LIMN	LIMN	LIMN28	EUT	European taurine	Bos taurus	Modern
ERR12035161	Harton	HART	HART	HART05	EUT	European taurine	Bos taurus	Modern
ERR2734942	Eastern_Finncattle	EAST	EAST	EAST01	EUT	European taurine	Bos taurus	Modern
ERR2734943	Eastern_Finncattle	EAST	EAST	EAST02	EUT	European taurine	Bos taurus	Modern
ERR2734944	Eastern_Finncattle	EAST	EAST	EAST03	EUT	European taurine	Bos taurus	Modern
ERR2734945	Eastern_Finncattle	EAST	EAST	EAST04	EUT	European taurine	Bos taurus	Modern
ERR2734946	Eastern_Finncattle	EAST	EAST	EAST05	EUT	European taurine	Bos taurus	Modern
ERR2734947	Western_Fincattle	WEST	WEST	WEST01	EUT	European taurine	Bos taurus	Modern
ERR2734948	Western_Fincattle	WEST	WEST	WEST02	EUT	European taurine	Bos taurus	Modern
ERR2734949	Western_Fincattle	WEST	WEST	WEST03	EUT	European taurine	Bos taurus	Modern
ERR2734950	Western_Fincattle	WEST	WEST	WEST04	EUT	European taurine	Bos taurus	Modern
ERR2734951	Western_Fincattle	WEST	WEST	WEST05	EUT	European taurine	Bos taurus	Modern
ERR2734952	Yakutian_cattle	YAKU	YAKU	YAKU01	EUT	European taurine	Bos taurus	Modern
ERR2734953	Yakutian_cattle	YAKU	YAKU	YAKU02	EUT	European taurine	Bos taurus	Modern
ERR2734954	Yakutian_cattle	YAKU	YAKU	YAKU03	EUT	European taurine	Bos taurus	Modern
ERR2734955	Yakutian_cattle	YAKU	YAKU	YAKU04	EUT	European taurine	Bos taurus	Modern
ERR2734956	Yakutian_cattle	YAKU	YAKU	YAKU05	EUT	European taurine	Bos taurus	Modern
ERR4336349	Sahiwal	SAHI	SAHI	SAHI01	ASI	Indicine	Bos indicus	Modern
ERR4336437	Sahiwal	SAHI	SAHI	SAHI02	ASI	Indicine	Bos indicus	Modern
ERR4350687	Sahiwal	SAHI	SAHI	SAHI03	ASI	Indicine	Bos indicus	Modern
ERR4352199	NDama_Senegal_Contemporary	NDSC	NDSC	NDSC01	AFT	African taurine	Bos taurus	Modern
ERR4352234	NDama_Senegal_Contemporary	NDSC	NDSC	NDSC02	AFT	African taurine	Bos taurus	Modern
ERR4352264	NDama_Senegal_Contemporary	NDSC	NDSC	NDSC03	AFT	African taurine	Bos taurus	Modern
ERR4472501	Baoule_BurkinaFaso_Contemporary	BBFC	BBFC	BBFC12	AFT	African taurine	Bos taurus	Modern
ERR4472506	Baoule_BurkinaFaso_Contemporary	BBFC	BBFC	BBFC13	AFT	African taurine	Bos taurus	Modern
ERR4472507	Baoule_BurkinaFaso_Contemporary	BBFC	BBFC	BBFC14	AFT	African taurine	Bos taurus	Modern
ERR4472508	Baoule_BurkinaFaso_Contemporary	BBFC	BBFC	BBFC15	AFT	African taurine	Bos taurus	Modern
ERR4472510	Baoule_BurkinaFaso_Contemporary	BBFC	BBFC	BBFC16	AFT	African taurine	Bos taurus	Modern
ERR4472512	Djakkore_Senegal_Contemporary	DJAK	DJAK	DJAK06	AFT	African taurine	Bos taurus/Bos indicus hybrid	Modern
ERR4472513	Djakkore_Senegal_Contemporary	DJAK	DJAK	DJAK07	AFT	African taurine	Bos taurus/Bos indicus hybrid	Modern
ERR4472514	Djakkore_Senegal_Contemporary	DJAK	DJAK	DJAK08	AFT	African taurine	Bos taurus/Bos indicus hybrid	Modern
ERR4472515	Baoule_BurkinaFaso_Contemporary	BBFC	BBFC	BBFC01	AFT	African taurine	Bos taurus	Modern
ERR4472516	Baoule_BurkinaFaso_Contemporary	BBFC	BBFC	BBFC02	AFT	African taurine	Bos taurus	Modern
ERR4494253	Djakkore_Senegal_Contemporary	DJAK	DJAK	DJAK09	AFT	African taurine	Bos taurus/Bos indicus hybrid	Modern
ERR4494254	Gourounsi	GOUR	GOUR	GOUR01	AFT	African taurine	Bos taurus	Modern
ERR4494255	Gourounsi	GOUR	GOUR	GOUR02	AFT	African taurine	Bos taurus	Modern
ERR4494296	Djakkore_Senegal_Contemporary	DJAK	DJAK	DJAK01	AFT	African taurine	Bos taurus/Bos indicus hybrid	Modern
ERR4494320	NDama_Senegal_Contemporary	NDSC	NDSC	NDSC04	AFT	African taurine	Bos taurus	Modern
ERR4494322	Zebu_Gobra	ZEBG	ZEBG	ZEBG01	AFS	African Sanga	Bos indicus	Modern
ERR4494323	Gourounsi	GOUR	GOUR	GOUR10	AFT	African taurine	Bos taurus	Modern
ERR4494324	NDama_Senegal_Contemporary	NDSC	NDSC	NDSC05	AFT	African taurine	Bos taurus	Modern
ERR4494325	Djakkore_Senegal_Contemporary	DJAK	DJAK	DJAK10	AFT	African taurine	Bos taurus/Bos indicus hybrid	Modern
ERR4494328	Zebu_Maure	ZBMA	ZBMA	ZBMA09	AFS	African Sanga	Bos indicus	Modern
ERR4494329	Zebu_Maure	ZBMA	ZBMA	ZBMA10	AFS	African Sanga	Bos indicus	Modern
ERR4494542	Zebu_Maure	ZBMA	ZBMA	ZBMA11	AFS	African Sanga	Bos indicus	Modern
ERR4494543	Zebu_Gobra	ZEBG	ZEBG	ZEBG50	AFS	African Sanga	Bos indicus	Modern
ERR4494929	Zebu_Gobra	ZEBG	ZEBG	ZEBG51	AFS	African Sanga	Bos indicus	Modern
ERR4494963	Zebu_Gobra	ZEBG	ZEBG	ZEBG52	AFS	African Sanga	Bos indicus	Modern
ERR4494964	Zebu_Gobra	ZEBG	ZEBG	ZEBG53	AFS	African Sanga	Bos indicus	Modern
ERR4494965	Zebu_Maure	ZBMA	ZBMA	ZBMA12	AFS	African Sanga	Bos indicus	Modern
ERR4494966	Zebu_Gobra	ZEBG	ZEBG	ZEBG54	AFS	African Sanga	Bos indicus	Modern
ERR4495107	Djakkore_Senegal_Contemporary	DJAK	DJAK	DJAK11	AFT	African taurine	Bos taurus/Bos indicus hybrid	Modern
ERR883660	Holstein	HOLS	HOLS	HOLS229	EUT	European taurine	Bos taurus	Modern
ERR883661	Holstein	HOLS	HOLS	HOLS230	EUT	European taurine	Bos taurus	Modern
ERR883662	Holstein	HOLS	HOLS	HOLS231	EUT	European taurine	Bos taurus	Modern
ERR883663	Holstein	HOLS	HOLS	HOLS232	EUT	European taurine	Bos taurus	Modern
ERR883664	Holstein	HOLS	HOLS	HOLS233	EUT	European taurine	Bos taurus	Modern
ERR883665	Holstein	HOLS	HOLS	HOLS234	EUT	European taurine	Bos taurus	Modern
ERR883666	Holstein	HOLS	HOLS	HOLS235	EUT	European taurine	Bos taurus	Modern
ERR883667	Holstein	HOLS	HOLS	HOLS236	EUT	European taurine	Bos taurus	Modern
ERR883668	Holstein	HOLS	HOLS	HOLS237	EUT	European taurine	Bos taurus	Modern
ERR883669	Holstein	HOLS	HOLS	HOLS238	EUT	European taurine	Bos taurus	Modern
ERR883670	Holstein	HOLS	HOLS	HOLS239	EUT	European taurine	Bos taurus	Modern
ERR883671	Holstein	HOLS	HOLS	HOLS255	EUT	European taurine	Bos taurus	Modern
ERR883672	Holstein	HOLS	HOLS	HOLS240	EUT	European taurine	Bos taurus	Modern
ERR883673	Holstein	HOLS	HOLS	HOLS241	EUT	European taurine	Bos taurus	Modern
ERR883674	Holstein	HOLS	HOLS	HOLS242	EUT	European taurine	Bos taurus	Modern
ERR883675	Holstein	HOLS	HOLS	HOLS243	EUT	European taurine	Bos taurus	Modern
ERR883676	Holstein	HOLS	HOLS	HOLS244	EUT	European taurine	Bos taurus	Modern
ERR883677	Holstein	HOLS	HOLS	HOLS245	EUT	European taurine	Bos taurus	Modern
ERR883678	Holstein	HOLS	HOLS	HOLS246	EUT	European taurine	Bos taurus	Modern
ERR883679	Holstein	HOLS	HOLS	HOLS247	EUT	European taurine	Bos taurus	Modern
ERR883680	Holstein	HOLS	HOLS	HOLS248	EUT	European taurine	Bos taurus	Modern
ERR883681	Holstein	HOLS	HOLS	HOLS249	EUT	European taurine	Bos taurus	Modern
ERR883682	Holstein	HOLS	HOLS	HOLS250	EUT	European taurine	Bos taurus	Modern
ERR883683	Holstein	HOLS	HOLS	HOLS251	EUT	European taurine	Bos taurus	Modern
ERR883684	Holstein	HOLS	HOLS	HOLS252	EUT	European taurine	Bos taurus	Modern
ERR883685	Holstein	HOLS	HOLS	HOLS253	EUT	European taurine	Bos taurus	Modern
ERR883686	Holstein	HOLS	HOLS	HOLS254	EUT	European taurine	Bos taurus	Modern
ERR883687	Montbeliarde	MONT	MONT	MONT01	EUT	European taurine	Bos taurus	Modern
ERR883688	Montbeliarde	MONT	MONT	MONT02	EUT	European taurine	Bos taurus	Modern
ERR883689	Montbeliarde	MONT	MONT	MONT03	EUT	European taurine	Bos taurus	Modern
ERR883690	Montbeliarde	MONT	MONT	MONT16	EUT	European taurine	Bos taurus	Modern
ERR883691	Montbeliarde	MONT	MONT	MONT04	EUT	European taurine	Bos taurus	Modern
ERR883692	Montbeliarde	MONT	MONT	MONT05	EUT	European taurine	Bos taurus	Modern
ERR883693	Montbeliarde	MONT	MONT	MONT06	EUT	European taurine	Bos taurus	Modern
ERR883694	Montbeliarde	MONT	MONT	MONT07	EUT	European taurine	Bos taurus	Modern
ERR883695	Montbeliarde	MONT	MONT	MONT08	EUT	European taurine	Bos taurus	Modern
ERR883696	Montbeliarde	MONT	MONT	MONT09	EUT	European taurine	Bos taurus	Modern
ERR883697	Montbeliarde	MONT	MONT	MONT17	EUT	European taurine	Bos taurus	Modern
ERR883698	Montbeliarde	MONT	MONT	MONT10	EUT	European taurine	Bos taurus	Modern
ERR883699	Montbeliarde	MONT	MONT	MONT11	EUT	European taurine	Bos taurus	Modern
ERR883700	Montbeliarde	MONT	MONT	MONT12	EUT	European taurine	Bos taurus	Modern
ERR883701	Montbeliarde	MONT	MONT	MONT13	EUT	European taurine	Bos taurus	Modern
ERR883702	Montbeliarde	MONT	MONT	MONT14	EUT	European taurine	Bos taurus	Modern
ERR883703	Montbeliarde	MONT	MONT	MONT15	EUT	European taurine	Bos taurus	Modern
ERR883704	Normande	NORM	NORM	NORM01	EUT	European taurine	Bos taurus	Modern
ERR883705	Normande	NORM	NORM	NORM02	EUT	European taurine	Bos taurus	Modern
ERR883706	Normande	NORM	NORM	NORM03	EUT	European taurine	Bos taurus	Modern
ERR883707	Normande	NORM	NORM	NORM04	EUT	European taurine	Bos taurus	Modern
ERR883708	Normande	NORM	NORM	NORM05	EUT	European taurine	Bos taurus	Modern
ERR883709	Normande	NORM	NORM	NORM06	EUT	European taurine	Bos taurus	Modern
ERR883710	Normande	NORM	NORM	NORM07	EUT	European taurine	Bos taurus	Modern
ERR883711	Normande	NORM	NORM	NORM08	EUT	European taurine	Bos taurus	Modern
ERR883712	Normande	NORM	NORM	NORM09	EUT	European taurine	Bos taurus	Modern
ERR883713	Normande	NORM	NORM	NORM10	EUT	European taurine	Bos taurus	Modern
ERR883714	Normande	NORM	NORM	NORM11	EUT	European taurine	Bos taurus	Modern
ERR883715	Normande	NORM	NORM	NORM12	EUT	European taurine	Bos taurus	Modern
ERR883716	Normande	NORM	NORM	NORM13	EUT	European taurine	Bos taurus	Modern
ERR883717	Normande	NORM	NORM	NORM14	EUT	European taurine	Bos taurus	Modern
ERR883718	Normande	NORM	NORM	NORM15	EUT	European taurine	Bos taurus	Modern
ERR883719	Normande	NORM	NORM	NORM16	EUT	European taurine	Bos taurus	Modern
ERR883720	Normande	NORM	NORM	NORM17	EUT	European taurine	Bos taurus	Modern
ERR883721	Normande	NORM	NORM	NORM18	EUT	European taurine	Bos taurus	Modern
EX05101	Nguni	NGUN	NGUN	NGUN27	AFS	African Sanga	Bos taurus/Bos indicus hybrid	Modern
EX06032	Nguni	NGUN	NGUN	NGUN28	AFS	African Sanga	Bos taurus/Bos indicus hybrid	Modern
EX07508	Nguni	NGUN	NGUN	NGUN29	AFS	African Sanga	Bos taurus/Bos indicus hybrid	Modern
EX10159	Nguni	NGUN	NGUN	NGUN30	AFS	African Sanga	Bos taurus/Bos indicus hybrid	Modern
EX17210	Nguni	NGUN	NGUN	NGUN31	AFS	African Sanga	Bos taurus/Bos indicus hybrid	Modern
F10	NDama_Guinea_1990s	NDAG	NDAG	NDAG39	AFT	African taurine	Bos taurus	Modern
F11	NDama_Guinea_1990s	NDAG	NDAG	NDAG40	AFT	African taurine	Bos taurus	Modern
F12	NDama_Guinea_1990s	NDAG	NDAG	NDAG41	AFT	African taurine	Bos taurus	Modern
F13	NDama_Guinea_1990s	NDAG	NDAG	NDAG48	AFT	African taurine	Bos taurus	Modern
F14	NDama_Guinea_1990s	NDAG	NDAG	NDAG42	AFT	African taurine	Bos taurus	Modern
F15	NDama_Guinea_1990s	NDAG	NDAG	NDAG43	AFT	African taurine	Bos taurus	Modern
F16	NDama_Guinea_1990s	NDAG	NDAG	NDAG44	AFT	African taurine	Bos taurus	Modern
F18	NDama_Guinea_1990s	NDAG	NDAG	NDAG45	AFT	African taurine	Bos taurus	Modern
F19	NDama_Guinea_1990s	NDAG	NDAG	NDAG46	AFT	African taurine	Bos taurus	Modern
F2	NDama_Guinea_1990s	NDAG	NDAG	NDAG32	AFT	African taurine	Bos taurus	Modern
F20	NDama_Guinea_1990s	NDAG	NDAG	NDAG47	AFT	African taurine	Bos taurus	Modern
F22	NDama_Guinea_1990s	NDAG	NDAG	NDAG49	AFT	African taurine	Bos taurus	Modern
F23	NDama_Guinea_1990s	NDAG	NDAG	NDAG50	AFT	African taurine	Bos taurus	Modern
F24	NDama_Guinea_1990s	NDAG	NDAG	NDAG51	AFT	African taurine	Bos taurus	Modern
F25	NDama_Guinea_1990s	NDAG	NDAG	NDAG52	AFT	African taurine	Bos taurus	Modern
F26	NDama_Guinea_1990s	NDAG	NDAG	NDAG53	AFT	African taurine	Bos taurus	Modern
F27	NDama_Guinea_1990s	NDAG	NDAG	NDAG54	AFT	African taurine	Bos taurus	Modern
F28	NDama_Guinea_1990s	NDAG	NDAG	NDAG55	AFT	African taurine	Bos taurus	Modern
F29	NDama_Guinea_1990s	NDAG	NDAG	NDAG56	AFT	African taurine	Bos taurus	Modern
F3	NDama_Guinea_1990s	NDAG	NDAG	NDAG33	AFT	African taurine	Bos taurus	Modern
F30	NDama_Guinea_1990s	NDAG	NDAG	NDAG57	AFT	African taurine	Bos taurus	Modern
F4	NDama_Guinea_1990s	NDAG	NDAG	NDAG34	AFT	African taurine	Bos taurus	Modern
F5	NDama_Guinea_1990s	NDAG	NDAG	NDAG35	AFT	African taurine	Bos taurus	Modern
F6	NDama_Guinea_1990s	NDAG	NDAG	NDAG36	AFT	African taurine	Bos taurus	Modern
F7	NDama_Guinea_1990s	NDAG	NDAG	NDAG37	AFT	African taurine	Bos taurus	Modern
F9	NDama_Guinea_1990s	NDAG	NDAG	NDAG38	AFT	African taurine	Bos taurus	Modern
FD10007	Drakensberger	DRAK	DRAK	DRAK26	SAC	South African Composite	Bos taurus/Bos indicus hybrid	Modern
FD12060	Drakensberger	DRAK	DRAK	DRAK27	SAC	South African Composite	Bos taurus/Bos indicus hybrid	Modern
FD14049	Drakensberger	DRAK	DRAK	DRAK28	SAC	South African Composite	Bos taurus/Bos indicus hybrid	Modern
FO13	Fogera	FOGE	FOGE	FOGE10	AFI	African Indicine	Bos taurus/Bos indicus hybrid	Modern
FO14	Fogera	FOGE	FOGE	FOGE11	AFI	African Indicine	Bos taurus/Bos indicus hybrid	Modern
FO15	Fogera	FOGE	FOGE	FOGE12	AFI	African Indicine	Bos taurus/Bos indicus hybrid	Modern
FO16	Fogera	FOGE	FOGE	FOGE13	AFI	African Indicine	Bos taurus/Bos indicus hybrid	Modern
FO17	Fogera	FOGE	FOGE	FOGE14	AFI	African Indicine	Bos taurus/Bos indicus hybrid	Modern
FO18	Fogera	FOGE	FOGE	FOGE15	AFI	African Indicine	Bos taurus/Bos indicus hybrid	Modern
FO19	Fogera	FOGE	FOGE	FOGE16	AFI	African Indicine	Bos taurus/Bos indicus hybrid	Modern
FO20	Fogera	FOGE	FOGE	FOGE17	AFI	African Indicine	Bos taurus/Bos indicus hybrid	Modern
FO22	Fogera	FOGE	FOGE	FOGE18	AFI	African Indicine	Bos taurus/Bos indicus hybrid	Modern
FO24	Fogera	FOGE	FOGE	FOGE19	AFI	African Indicine	Bos taurus/Bos indicus hybrid	Modern
FO25	Fogera	FOGE	FOGE	FOGE20	AFI	African Indicine	Bos taurus/Bos indicus hybrid	Modern
FO30	Fogera	FOGE	FOGE	FOGE21	AFI	African Indicine	Bos taurus/Bos indicus hybrid	Modern
FO32	Fogera	FOGE	FOGE	FOGE22	AFI	African Indicine	Bos taurus/Bos indicus hybrid	Modern
FO34	Fogera	FOGE	FOGE	FOGE23	AFI	African Indicine	Bos taurus/Bos indicus hybrid	Modern
FO9	Fogera	FOGE	FOGE	FOGE09	AFI	African Indicine	Bos taurus/Bos indicus hybrid	Modern
FP11727	Afrikaner	AFRI	AFRI	AFRI20	AFS	African Sanga	Bos taurus/Bos indicus hybrid	Modern
FR11059	Afrikaner	AFRI	AFRI	AFRI21	AFS	African Sanga	Bos taurus/Bos indicus hybrid	Modern
G09024	Tuli	TULI	TULI	TULI41	SAC	South African Composite	Bos taurus/Bos indicus hybrid	Modern
G10129	Tuli	TULI	TULI	TULI42	SAC	South African Composite	Bos taurus/Bos indicus hybrid	Modern
G12133	Tuli	TULI	TULI	TULI43	SAC	South African Composite	Bos taurus/Bos indicus hybrid	Modern
G12159	Tuli	TULI	TULI	TULI44	SAC	South African Composite	Bos taurus/Bos indicus hybrid	Modern
G15	Purebred_Limonero	LIMN	LIMN	LIMN19	EUT	European taurine	Bos taurus	Modern
GA130092	Nguni	NGUN	NGUN	NGUN32	AFS	African Sanga	Bos taurus/Bos indicus hybrid	Modern
GJN1404	Bonsmara	BONS	BONS	BONS16	SAC	South African Composite	Bos taurus/Bos indicus hybrid	Modern
GJN1407	Bonsmara	BONS	BONS	BONS17	SAC	South African Composite	Bos taurus/Bos indicus hybrid	Modern
GJN14103	Bonsmara	BONS	BONS	BONS18	SAC	South African Composite	Bos taurus/Bos indicus hybrid	Modern
GJN15191	Bonsmara	BONS	BONS	BONS19	SAC	South African Composite	Bos taurus/Bos indicus hybrid	Modern
GRZW	Great_Zimbabwe	GRZW	GRZW	GRZW	GRZW	Ancient cattle	ancient Bos taurus	Ancient
H12018	Nguni	NGUN	NGUN	NGUN33	AFS	African Sanga	Bos taurus/Bos indicus hybrid	Modern
H12964	Nguni	NGUN	NGUN	NGUN34	AFS	African Sanga	Bos taurus/Bos indicus hybrid	Modern
H12986	Nguni	NGUN	NGUN	NGUN35	AFS	African Sanga	Bos taurus/Bos indicus hybrid	Modern
H13157	Nguni	NGUN	NGUN	NGUN36	AFS	African Sanga	Bos taurus/Bos indicus hybrid	Modern
H14258	Nguni	NGUN	NGUN	NGUN37	AFS	African Sanga	Bos taurus/Bos indicus hybrid	Modern
HN09017	Drakensberger	DRAK	DRAK	DRAK29	SAC	South African Composite	Bos taurus/Bos indicus hybrid	Modern
HN12047	Drakensberger	DRAK	DRAK	DRAK30	SAC	South African Composite	Bos taurus/Bos indicus hybrid	Modern
HN13030	Drakensberger	DRAK	DRAK	DRAK31	SAC	South African Composite	Bos taurus/Bos indicus hybrid	Modern
HN13059	Drakensberger	DRAK	DRAK	DRAK32	SAC	South African Composite	Bos taurus/Bos indicus hybrid	Modern
HN13186	Drakensberger	DRAK	DRAK	DRAK33	SAC	South African Composite	Bos taurus/Bos indicus hybrid	Modern
HP07012	Afrikaner	AFRI	AFRI	AFRI22	AFS	African Sanga	Bos taurus/Bos indicus hybrid	Modern
HP08008	Afrikaner	AFRI	AFRI	AFRI23	AFS	African Sanga	Bos taurus/Bos indicus hybrid	Modern
HP09019	Afrikaner	AFRI	AFRI	AFRI24	AFS	African Sanga	Bos taurus/Bos indicus hybrid	Modern
HP12020	Afrikaner	AFRI	AFRI	AFRI25	AFS	African Sanga	Bos taurus/Bos indicus hybrid	Modern
IR160117	Drakensberger	DRAK	DRAK	DRAK34	SAC	South African Composite	Bos taurus/Bos indicus hybrid	Modern
IR9	Iringa_Red	IRIN	IRIN	IRIN04	AFI	African Indicine	Bos indicus	Modern
JA060069	Drakensberger	DRAK	DRAK	DRAK35	SAC	South African Composite	Bos taurus/Bos indicus hybrid	Modern
JA080057	Drakensberger	DRAK	DRAK	DRAK36	SAC	South African Composite	Bos taurus/Bos indicus hybrid	Modern
JA140071	Drakensberger	DRAK	DRAK	DRAK37	SAC	South African Composite	Bos taurus/Bos indicus hybrid	Modern
JA150060	Drakensberger	DRAK	DRAK	DRAK38	SAC	South African Composite	Bos taurus/Bos indicus hybrid	Modern
JLS1274	Mashona	MASH	MASH	MASH14	AFS	African Sanga	Bos taurus/Bos indicus hybrid	Modern
JLS1507	Mashona	MASH	MASH	MASH15	AFS	African Sanga	Bos taurus/Bos indicus hybrid	Modern
JLS1509	Mashona	MASH	MASH	MASH16	AFS	African Sanga	Bos taurus/Bos indicus hybrid	Modern
JLS1592	Mashona	MASH	MASH	MASH17	AFS	African Sanga	Bos taurus/Bos indicus hybrid	Modern
JLS1830	Mashona	MASH	MASH	MASH18	AFS	African Sanga	Bos taurus/Bos indicus hybrid	Modern
JLS1840	Mashona	MASH	MASH	MASH19	AFS	African Sanga	Bos taurus/Bos indicus hybrid	Modern
JLS1850	Mashona	MASH	MASH	MASH20	AFS	African Sanga	Bos taurus/Bos indicus hybrid	Modern
JLS1870	Mashona	MASH	MASH	MASH21	AFS	African Sanga	Bos taurus/Bos indicus hybrid	Modern
JLS19114	Mashona	MASH	MASH	MASH22	AFS	African Sanga	Bos taurus/Bos indicus hybrid	Modern
JRB100077	Bonsmara	BONS	BONS	BONS20	SAC	South African Composite	Bos taurus/Bos indicus hybrid	Modern
JRB100139	Bonsmara	BONS	BONS	BONS21	SAC	South African Composite	Bos taurus/Bos indicus hybrid	Modern
JRB120051	Bonsmara	BONS	BONS	BONS22	SAC	South African Composite	Bos taurus/Bos indicus hybrid	Modern
JRB130064	Bonsmara	BONS	BONS	BONS23	SAC	South African Composite	Bos taurus/Bos indicus hybrid	Modern
JRB130104	Bonsmara	BONS	BONS	BONS24	SAC	South African Composite	Bos taurus/Bos indicus hybrid	Modern
JRB170093	Bonsmara	BONS	BONS	BONS25	SAC	South African Composite	Bos taurus/Bos indicus hybrid	Modern
JSD11009	Drakensberger	DRAK	DRAK	DRAK39	SAC	South African Composite	Bos taurus/Bos indicus hybrid	Modern
KEN1	Kenana	KNAT	KENA	KENA05	AFI	African Indicine	Bos indicus	Modern
KEN10	Kenana	KNAT	KENA	KENA13	AFI	African Indicine	Bos indicus	Modern
KEN11	Kenana	KNAT	KENA	KENA14	AFI	African Indicine	Bos indicus	Modern
KEN12	Kenana	KNAT	KENA	KENA15	AFI	African Indicine	Bos indicus	Modern
KEN13	Kenana	KNAT	KENA	KENA16	AFI	African Indicine	Bos indicus	Modern
KEN14	Kenana	KNAT	KENA	KENA17	AFI	African Indicine	Bos indicus	Modern
KEN15	Kenana	KNAT	KENA	KENA18	AFI	African Indicine	Bos indicus	Modern
KEN16	Kenana	KNAT	KENA	KENA19	AFI	African Indicine	Bos indicus	Modern
KEN17	Kenana	KNAT	KENA	KENA20	AFI	African Indicine	Bos indicus	Modern
KEN18	Kenana	KNAT	KENA	KENA21	AFI	African Indicine	Bos indicus	Modern
KEN19a	Kenana	KNAT	KENA	KENA22	AFI	African Indicine	Bos indicus	Modern
KEN20	Kenana	KNAT	KENA	KENA23	AFI	African Indicine	Bos indicus	Modern
KEN21	Kenana	KNAT	KENA	KENA24	AFI	African Indicine	Bos indicus	Modern
KEN22a	Kenana	KNAT	KENA	KENA25	AFI	African Indicine	Bos indicus	Modern
KEN23	Kenana	KNAT	KENA	KENA26	AFI	African Indicine	Bos indicus	Modern
KEN24a	Kenana	KNAT	KENA	KENA27	AFI	African Indicine	Bos indicus	Modern
KEN25	Kenana	KNAT	KENA	KENA28	AFI	African Indicine	Bos indicus	Modern
KEN26a	Kenana	KNAT	KENA	KENA29	AFI	African Indicine	Bos indicus	Modern
KEN27a	Kenana	KNAT	KENA	KENA30	AFI	African Indicine	Bos indicus	Modern
KEN28a	Kenana	KNAT	KENA	KENA31	AFI	African Indicine	Bos indicus	Modern
KEN29	Kenana	KNAT	KENA	KENA32	AFI	African Indicine	Bos indicus	Modern
KEN2a	Kenana	KNAT	KENA	KENA06	AFI	African Indicine	Bos indicus	Modern
KEN31	Kenana	KNAT	KENA	KENA33	AFI	African Indicine	Bos indicus	Modern
KEN32	Kenana	KNAT	KENA	KENA34	AFI	African Indicine	Bos indicus	Modern
KEN33	Kenana	KNAT	KENA	KENA35	AFI	African Indicine	Bos indicus	Modern
KEN34	Kenana	KNAT	KENA	KENA36	AFI	African Indicine	Bos indicus	Modern
KEN35	Kenana	KNAT	KENA	KENA37	AFI	African Indicine	Bos indicus	Modern
KEN36	Kenana	KNAT	KENA	KENA38	AFI	African Indicine	Bos indicus	Modern
KEN37	Kenana	KNAT	KENA	KENA39	AFI	African Indicine	Bos indicus	Modern
KEN4a	Kenana	KNAT	KENA	KENA07	AFI	African Indicine	Bos indicus	Modern
KEN5	Kenana	KNAT	KENA	KENA08	AFI	African Indicine	Bos indicus	Modern
KEN6	Kenana	KNAT	KENA	KENA09	AFI	African Indicine	Bos indicus	Modern
KEN7	Kenana	KNAT	KENA	KENA10	AFI	African Indicine	Bos indicus	Modern
KEN8	Kenana	KNAT	KENA	KENA11	AFI	African Indicine	Bos indicus	Modern
KEN9	Kenana	KNAT	KENA	KENA12	AFI	African Indicine	Bos indicus	Modern
KilimangZebu5	Kilimanjaro_Zebu	KILI	KILI	KILI04	AFI	African Indicine	Bos indicus	Modern
KP50	Sokoto_Gudali	SOKO	SOKO	SOKO42	AFS	African Sanga	Bos indicus	Modern
KP51	Sokoto_Gudali	SOKO	SOKO	SOKO41	AFS	African Sanga	Bos indicus	Modern
KP52	Sokoto_Gudali	SOKO	SOKO	SOKO40	AFS	African Sanga	Bos indicus	Modern
KP57	Sokoto_Gudali	SOKO	SOKO	SOKO39	AFS	African Sanga	Bos indicus	Modern
Ku02	White_Fulani	WHIT	WHIT	WHIT05	AFS	African Sanga	Bos indicus	Modern
Ku03	White_Fulani	WHIT	WHIT	WHIT06	AFS	African Sanga	Bos indicus	Modern
Ku04	White_Fulani	WHIT	WHIT	WHIT07	AFS	African Sanga	Bos indicus	Modern
Ku05	White_Fulani	WHIT	WHIT	WHIT08	AFS	African Sanga	Bos indicus	Modern
Ku06	White_Fulani	WHIT	WHIT	WHIT09	AFS	African Sanga	Bos indicus	Modern
Ku07	White_Fulani	WHIT	WHIT	WHIT10	AFS	African Sanga	Bos indicus	Modern
Ku09	White_Fulani	WHIT	WHIT	WHIT11	AFS	African Sanga	Bos indicus	Modern
Ku11	White_Fulani	WHIT	WHIT	WHIT12	AFS	African Sanga	Bos indicus	Modern
Ku12	White_Fulani	WHIT	WHIT	WHIT13	AFS	African Sanga	Bos indicus	Modern
Ku13	White_Fulani	WHIT	WHIT	WHIT14	AFS	African Sanga	Bos indicus	Modern
Ku15	White_Fulani	WHIT	WHIT	WHIT15	AFS	African Sanga	Bos indicus	Modern
Ku16	White_Fulani	WHIT	WHIT	WHIT16	AFS	African Sanga	Bos indicus	Modern
Ku18	White_Fulani	WHIT	WHIT	WHIT17	AFS	African Sanga	Bos indicus	Modern
Ku20	White_Fulani	WHIT	WHIT	WHIT18	AFS	African Sanga	Bos indicus	Modern
Ku21	White_Fulani	WHIT	WHIT	WHIT19	AFS	African Sanga	Bos indicus	Modern
Ku22	White_Fulani	WHIT	WHIT	WHIT20	AFS	African Sanga	Bos indicus	Modern
Ku23	White_Fulani	WHIT	WHIT	WHIT21	AFS	African Sanga	Bos indicus	Modern
Ku24	White_Fulani	WHIT	WHIT	WHIT22	AFS	African Sanga	Bos indicus	Modern
Ku25	White_Fulani	WHIT	WHIT	WHIT23	AFS	African Sanga	Bos indicus	Modern
Ku26	White_Fulani	WHIT	WHIT	WHIT24	AFS	African Sanga	Bos indicus	Modern
Ku27	White_Fulani	WHIT	WHIT	WHIT25	AFS	African Sanga	Bos indicus	Modern
Ku28	White_Fulani	WHIT	WHIT	WHIT26	AFS	African Sanga	Bos indicus	Modern
Ku29	White_Fulani	WHIT	WHIT	WHIT27	AFS	African Sanga	Bos indicus	Modern
Ku31	White_Fulani	WHIT	WHIT	WHIT28	AFS	African Sanga	Bos indicus	Modern
Ku32	White_Fulani	WHIT	WHIT	WHIT29	AFS	African Sanga	Bos indicus	Modern
Ku33	Sokoto_Gudali	SOKO	SOKO	SOKO22	AFS	African Sanga	Bos indicus	Modern
Ku34	Sokoto_Gudali	SOKO	SOKO	SOKO23	AFS	African Sanga	Bos indicus	Modern
Ku36	Sokoto_Gudali	SOKO	SOKO	SOKO24	AFS	African Sanga	Bos indicus	Modern
Ku37	Sokoto_Gudali	SOKO	SOKO	SOKO25	AFS	African Sanga	Bos indicus	Modern
Ku38	Sokoto_Gudali	SOKO	SOKO	SOKO26	AFS	African Sanga	Bos indicus	Modern
Ku39	Sokoto_Gudali	SOKO	SOKO	SOKO27	AFS	African Sanga	Bos indicus	Modern
Ku41	Sokoto_Gudali	SOKO	SOKO	SOKO28	AFS	African Sanga	Bos indicus	Modern
Ku42	Sokoto_Gudali	SOKO	SOKO	SOKO29	AFS	African Sanga	Bos indicus	Modern
Ku43	Sokoto_Gudali	SOKO	SOKO	SOKO30	AFS	African Sanga	Bos indicus	Modern
Ku44	Sokoto_Gudali	SOKO	SOKO	SOKO31	AFS	African Sanga	Bos indicus	Modern
Ku45	Sokoto_Gudali	SOKO	SOKO	SOKO32	AFS	African Sanga	Bos indicus	Modern
Ku46	Sokoto_Gudali	SOKO	SOKO	SOKO33	AFS	African Sanga	Bos indicus	Modern
Ku47	Sokoto_Gudali	SOKO	SOKO	SOKO34	AFS	African Sanga	Bos indicus	Modern
Ku49	Sokoto_Gudali	SOKO	SOKO	SOKO35	AFS	African Sanga	Bos indicus	Modern
Ku50	Sokoto_Gudali	SOKO	SOKO	SOKO36	AFS	African Sanga	Bos indicus	Modern
Ku52	Sokoto_Gudali	SOKO	SOKO	SOKO37	AFS	African Sanga	Bos indicus	Modern
Ku53	Sokoto_Gudali	SOKO	SOKO	SOKO38	AFS	African Sanga	Bos indicus	Modern
KVR31	Kavirondo	KAVI	KAVI	KAVI04	AFI	African Indicine	Bos indicus	Modern
KVR41	Kavirondo	KAVI	KAVI	KAVI05	AFI	African Indicine	Bos indicus	Modern
KVR46	Kavirondo	KAVI	KAVI	KAVI06	AFI	African Indicine	Bos indicus	Modern
LEB14434	Nguni	NGUN	NGUN	NGUN38	AFS	African Sanga	Bos taurus/Bos indicus hybrid	Modern
LES11021	Bonsmara	BONS	BONS	BONS26	SAC	South African Composite	Bos taurus/Bos indicus hybrid	Modern
LES12021	Bonsmara	BONS	BONS	BONS27	SAC	South African Composite	Bos taurus/Bos indicus hybrid	Modern
LES12026	Bonsmara	BONS	BONS	BONS28	SAC	South African Composite	Bos taurus/Bos indicus hybrid	Modern
LES12031	Bonsmara	BONS	BONS	BONS29	SAC	South African Composite	Bos taurus/Bos indicus hybrid	Modern
LES15051	Bonsmara	BONS	BONS	BONS30	SAC	South African Composite	Bos taurus/Bos indicus hybrid	Modern
lim000311	East_African_Short_Zebu	EASZ	EASZ	EASZ144	AZE	African Indicine Composite	Bos indicus	Modern
lim000799	East_African_Short_Zebu	EASZ	EASZ	EASZ145	AZE	African Indicine Composite	Bos indicus	Modern
MB1	Mbororo	MBOR	MBOR	MBOR04	AFS	African Sanga	Bos taurus/Bos indicus hybrid	Modern
MB10	Mbororo	MBOR	MBOR	MBOR10	AFS	African Sanga	Bos taurus/Bos indicus hybrid	Modern
MB11	Mbororo	MBOR	MBOR	MBOR11	AFS	African Sanga	Bos taurus/Bos indicus hybrid	Modern
MB12	Mbororo	MBOR	MBOR	MBOR12	AFS	African Sanga	Bos taurus/Bos indicus hybrid	Modern
MB13	Mbororo	MBOR	MBOR	MBOR13	AFS	African Sanga	Bos taurus/Bos indicus hybrid	Modern
MB14	Mbororo	MBOR	MBOR	MBOR14	AFS	African Sanga	Bos taurus/Bos indicus hybrid	Modern
MB15	Mbororo	MBOR	MBOR	MBOR15	AFS	African Sanga	Bos taurus/Bos indicus hybrid	Modern
MB16	Mbororo	MBOR	MBOR	MBOR16	AFS	African Sanga	Bos taurus/Bos indicus hybrid	Modern
MB17	Mbororo	MBOR	MBOR	MBOR17	AFS	African Sanga	Bos taurus/Bos indicus hybrid	Modern
MB18	Mbororo	MBOR	MBOR	MBOR18	AFS	African Sanga	Bos taurus/Bos indicus hybrid	Modern
MB19	Mbororo	MBOR	MBOR	MBOR19	AFS	African Sanga	Bos taurus/Bos indicus hybrid	Modern
MB20	Mbororo	MBOR	MBOR	MBOR20	AFS	African Sanga	Bos taurus/Bos indicus hybrid	Modern
MB21	Mbororo	MBOR	MBOR	MBOR21	AFS	African Sanga	Bos taurus/Bos indicus hybrid	Modern
MB23	Mbororo	MBOR	MBOR	MBOR22	AFS	African Sanga	Bos taurus/Bos indicus hybrid	Modern
MB24	Mbororo	MBOR	MBOR	MBOR23	AFS	African Sanga	Bos taurus/Bos indicus hybrid	Modern
MB25	Mbororo	MBOR	MBOR	MBOR24	AFS	African Sanga	Bos taurus/Bos indicus hybrid	Modern
MB26	Mbororo	MBOR	MBOR	MBOR25	AFS	African Sanga	Bos taurus/Bos indicus hybrid	Modern
MB27	Mbororo	MBOR	MBOR	MBOR26	AFS	African Sanga	Bos taurus/Bos indicus hybrid	Modern
MB28	Mbororo	MBOR	MBOR	MBOR27	AFS	African Sanga	Bos taurus/Bos indicus hybrid	Modern
MB29	Mbororo	MBOR	MBOR	MBOR28	AFS	African Sanga	Bos taurus/Bos indicus hybrid	Modern
MB3	Mbororo	MBOR	MBOR	MBOR05	AFS	African Sanga	Bos taurus/Bos indicus hybrid	Modern
MB30	Mbororo	MBOR	MBOR	MBOR29	AFS	African Sanga	Bos taurus/Bos indicus hybrid	Modern
MB31	Mbororo	MBOR	MBOR	MBOR30	AFS	African Sanga	Bos taurus/Bos indicus hybrid	Modern
MB32	Mbororo	MBOR	MBOR	MBOR31	AFS	African Sanga	Bos taurus/Bos indicus hybrid	Modern
MB33	Mbororo	MBOR	MBOR	MBOR32	AFS	African Sanga	Bos taurus/Bos indicus hybrid	Modern
MB34	Mbororo	MBOR	MBOR	MBOR33	AFS	African Sanga	Bos taurus/Bos indicus hybrid	Modern
MB35	Mbororo	MBOR	MBOR	MBOR34	AFS	African Sanga	Bos taurus/Bos indicus hybrid	Modern
MB36	Mbororo	MBOR	MBOR	MBOR35	AFS	African Sanga	Bos taurus/Bos indicus hybrid	Modern
MB37	Mbororo	MBOR	MBOR	MBOR36	AFS	African Sanga	Bos taurus/Bos indicus hybrid	Modern
MB38	Mbororo	MBOR	MBOR	MBOR37	AFS	African Sanga	Bos taurus/Bos indicus hybrid	Modern
MB39	Mbororo	MBOR	MBOR	MBOR38	AFS	African Sanga	Bos taurus/Bos indicus hybrid	Modern
MB4	Mbororo	MBOR	MBOR	MBOR06	AFS	African Sanga	Bos taurus/Bos indicus hybrid	Modern
MB40	Mbororo	MBOR	MBOR	MBOR39	AFS	African Sanga	Bos taurus/Bos indicus hybrid	Modern
MB41	Mbororo	MBOR	MBOR	MBOR40	AFS	African Sanga	Bos taurus/Bos indicus hybrid	Modern
MB42	Mbororo	MBOR	MBOR	MBOR41	AFS	African Sanga	Bos taurus/Bos indicus hybrid	Modern
MB43	Mbororo	MBOR	MBOR	MBOR42	AFS	African Sanga	Bos taurus/Bos indicus hybrid	Modern
MB45	Mbororo	MBOR	MBOR	MBOR43	AFS	African Sanga	Bos taurus/Bos indicus hybrid	Modern
MB46	Mbororo	MBOR	MBOR	MBOR44	AFS	African Sanga	Bos taurus/Bos indicus hybrid	Modern
MB47	Mbororo	MBOR	MBOR	MBOR45	AFS	African Sanga	Bos taurus/Bos indicus hybrid	Modern
MB6	Mbororo	MBOR	MBOR	MBOR07	AFS	African Sanga	Bos taurus/Bos indicus hybrid	Modern
MB7	Mbororo	MBOR	MBOR	MBOR08	AFS	African Sanga	Bos taurus/Bos indicus hybrid	Modern
MB8	Mbororo	MBOR	MBOR	MBOR09	AFS	African Sanga	Bos taurus/Bos indicus hybrid	Modern
MC09715R	Afrikaner	AFRI	AFRI	AFRI27	AFS	African Sanga	Bos taurus/Bos indicus hybrid	Modern
MC110025	Afrikaner	AFRI	AFRI	AFRI29	AFS	African Sanga	Bos taurus/Bos indicus hybrid	Modern
MC1177	Afrikaner	AFRI	AFRI	AFRI26	AFS	African Sanga	Bos taurus/Bos indicus hybrid	Modern
MC12273R	Afrikaner	AFRI	AFRI	AFRI28	AFS	African Sanga	Bos taurus/Bos indicus hybrid	Modern
MC160776	Afrikaner	AFRI	AFRI	AFRI30	AFS	African Sanga	Bos taurus/Bos indicus hybrid	Modern
MC190366	Afrikaner	AFRI	AFRI	AFRI31	AFS	African Sanga	Bos taurus/Bos indicus hybrid	Modern
MCU17110	Bonsmara	BONS	BONS	BONS31	SAC	South African Composite	Bos taurus/Bos indicus hybrid	Modern
MCU17210	Bonsmara	BONS	BONS	BONS32	SAC	South African Composite	Bos taurus/Bos indicus hybrid	Modern
MCU18200	Bonsmara	BONS	BONS	BONS33	SAC	South African Composite	Bos taurus/Bos indicus hybrid	Modern
MCU18300	Bonsmara	BONS	BONS	BONS34	SAC	South African Composite	Bos taurus/Bos indicus hybrid	Modern
MCU19176	Bonsmara	BONS	BONS	BONS35	SAC	South African Composite	Bos taurus/Bos indicus hybrid	Modern
MG07025	Tuli	TULI	TULI	TULI45	SAC	South African Composite	Bos taurus/Bos indicus hybrid	Modern
MG17083	Tuli	TULI	TULI	TULI46	SAC	South African Composite	Bos taurus/Bos indicus hybrid	Modern
MG18032	Tuli	TULI	TULI	TULI47	SAC	South African Composite	Bos taurus/Bos indicus hybrid	Modern
mixcattle10	Boran	BORA	BORA	BORA07	AFI	African Indicine	Bos indicus	Modern
mixcattle11	Boran	BORA	BORA	BORA08	AFI	African Indicine	Bos indicus	Modern
mixcattle12	Boran	BORA	BORA	BORA09	AFI	African Indicine	Bos indicus	Modern
mixcattle13	Boran	BORA	BORA	BORA10	AFI	African Indicine	Bos indicus	Modern
mixcattle14	Boran	BORA	BORA	BORA11	AFI	African Indicine	Bos indicus	Modern
mixcattle15	Boran	BORA	BORA	BORA12	AFI	African Indicine	Bos indicus	Modern
mixcattle16	Boran	BORA	BORA	BORA13	AFI	African Indicine	Bos indicus	Modern
mixcattle17	NDama_Gambia_ILRI	NDGM	NDGM	NDGM23	AFT	African taurine	Bos taurus	Modern
mixcattle18	NDama_Gambia_ILRI	NDGM	NDGM	NDGM24	AFT	African taurine	Bos taurus	Modern
mixcattle19	NDama_Gambia_ILRI	NDGM	NDGM	NDGM25	AFT	African taurine	Bos taurus	Modern
mixcattle20	NDama_Gambia_ILRI	NDGM	NDGM	NDGM26	AFT	African taurine	Bos taurus	Modern
mixcattle21	NDama_Gambia_ILRI	NDGM	NDGM	NDGM27	AFT	African taurine	Bos taurus	Modern
mixcattle22	NDama_Gambia_ILRI	NDGM	NDGM	NDGM28	AFT	African taurine	Bos taurus	Modern
mixcattle23	NDama_Gambia_ILRI	NDGM	NDGM	NDGM29	AFT	African taurine	Bos taurus	Modern
mixcattle24	NDama_Gambia_ILRI	NDGM	NDGM	NDGM30	AFT	African taurine	Bos taurus	Modern
mixcattle9	Boran	BORA	BORA	BORA06	AFI	African Indicine	Bos indicus	Modern
MT1	Borgou	BORG	BORG	BORG04	AFS	African Sanga	Bos taurus/Bos indicus hybrid	Modern
MT10	Borgou	BORG	BORG	BORG13	AFS	African Sanga	Bos taurus/Bos indicus hybrid	Modern
MT11	Borgou	BORG	BORG	BORG14	AFS	African Sanga	Bos taurus/Bos indicus hybrid	Modern
MT12	Borgou	BORG	BORG	BORG15	AFS	African Sanga	Bos taurus/Bos indicus hybrid	Modern
MT13	Borgou	BORG	BORG	BORG16	AFS	African Sanga	Bos taurus/Bos indicus hybrid	Modern
MT14	Borgou	BORG	BORG	BORG17	AFS	African Sanga	Bos taurus/Bos indicus hybrid	Modern
MT15	Borgou	BORG	BORG	BORG18	AFS	African Sanga	Bos taurus/Bos indicus hybrid	Modern
MT17	Borgou	BORG	BORG	BORG19	AFS	African Sanga	Bos taurus/Bos indicus hybrid	Modern
MT18	Borgou	BORG	BORG	BORG20	AFS	African Sanga	Bos taurus/Bos indicus hybrid	Modern
MT19	Borgou	BORG	BORG	BORG21	AFS	African Sanga	Bos taurus/Bos indicus hybrid	Modern
MT2	Borgou	BORG	BORG	BORG05	AFS	African Sanga	Bos taurus/Bos indicus hybrid	Modern
MT20	Borgou	BORG	BORG	BORG22	AFS	African Sanga	Bos taurus/Bos indicus hybrid	Modern
MT21	Borgou	BORG	BORG	BORG23	AFS	African Sanga	Bos taurus/Bos indicus hybrid	Modern
MT22	Borgou	BORG	BORG	BORG24	AFS	African Sanga	Bos taurus/Bos indicus hybrid	Modern
MT23	Borgou	BORG	BORG	BORG25	AFS	African Sanga	Bos taurus/Bos indicus hybrid	Modern
MT24	Borgou	BORG	BORG	BORG26	AFS	African Sanga	Bos taurus/Bos indicus hybrid	Modern
MT25	Borgou	BORG	BORG	BORG27	AFS	African Sanga	Bos taurus/Bos indicus hybrid	Modern
MT26	Borgou	BORG	BORG	BORG28	AFS	African Sanga	Bos taurus/Bos indicus hybrid	Modern
MT27	Borgou	BORG	BORG	BORG29	AFS	African Sanga	Bos taurus/Bos indicus hybrid	Modern
MT28	Borgou	BORG	BORG	BORG30	AFS	African Sanga	Bos taurus/Bos indicus hybrid	Modern
MT3	Borgou	BORG	BORG	BORG06	AFS	African Sanga	Bos taurus/Bos indicus hybrid	Modern
MT4	Borgou	BORG	BORG	BORG07	AFS	African Sanga	Bos taurus/Bos indicus hybrid	Modern
MT5	Borgou	BORG	BORG	BORG08	AFS	African Sanga	Bos taurus/Bos indicus hybrid	Modern
MT6	Borgou	BORG	BORG	BORG09	AFS	African Sanga	Bos taurus/Bos indicus hybrid	Modern
MT7	Borgou	BORG	BORG	BORG10	AFS	African Sanga	Bos taurus/Bos indicus hybrid	Modern
MT8	Borgou	BORG	BORG	BORG11	AFS	African Sanga	Bos taurus/Bos indicus hybrid	Modern
MT9	Borgou	BORG	BORG	BORG12	AFS	African Sanga	Bos taurus/Bos indicus hybrid	Modern
MUTNGRF000000000001	Muturu_Nigeria_Savannah	MUTS	MUTS	MUTS01	AFT	African taurine	Bos taurus	Modern
MUTNGRM000000000021	Muturu_Nigeria_Forest	MUTF	MUTF	MUTF01	AFT	African taurine	Bos taurus	Modern
MUTNGRM000000000022	Muturu_Nigeria_Forest	MUTF	MUTF	MUTF02	AFT	African taurine	Bos taurus	Modern
MUTNGRM000000000023	Muturu_Nigeria_Forest	MUTF	MUTF	MUTF03	AFT	African taurine	Bos taurus	Modern
MUTNGRM000000000024	Muturu_Nigeria_Forest	MUTF	MUTF	MUTF04	AFT	African taurine	Bos taurus	Modern
MUTNGRX000000000002	Muturu_Nigeria_Savannah	MUTS	MUTS	MUTS02	AFT	African taurine	Bos taurus	Modern
MUTNGRX000000000003	Muturu_Nigeria_Savannah	MUTS	MUTS	MUTS03	AFT	African taurine	Bos taurus	Modern
MUTNGRX000000000004	Muturu_Nigeria_Savannah	MUTS	MUTS	MUTS04	AFT	African taurine	Bos taurus	Modern
MUTNGRX000000000005	Muturu_Nigeria_Savannah	MUTS	MUTS	MUTS05	AFT	African taurine	Bos taurus	Modern
MUTNGRX000000000006	Muturu_Nigeria_Savannah	MUTS	MUTS	MUTS06	AFT	African taurine	Bos taurus	Modern
MUTNGRX000000000007	Muturu_Nigeria_Savannah	MUTS	MUTS	MUTS07	AFT	African taurine	Bos taurus	Modern
MUTNGRX000000000008	Muturu_Nigeria_Savannah	MUTS	MUTS	MUTS08	AFT	African taurine	Bos taurus	Modern
MUTNGRX000000000009	Muturu_Nigeria_Savannah	MUTS	MUTS	MUTS09	AFT	African taurine	Bos taurus	Modern
MUTNGRX000000000010	Muturu_Nigeria_Savannah	MUTS	MUTS	MUTS10	AFT	African taurine	Bos taurus	Modern
N09137	Nguni	NGUN	NGUN	NGUN40	AFS	African Sanga	Bos taurus/Bos indicus hybrid	Modern
N1005	Nguni	NGUN	NGUN	NGUN39	AFS	African Sanga	Bos taurus/Bos indicus hybrid	Modern
Na01	Muturu_Nigeria_1990s	MUTT	MUTT	MUTT01	AFT	African taurine	Bos taurus	Modern
Na04	Muturu_Nigeria_1990s	MUTT	MUTT	MUTT02	AFT	African taurine	Bos taurus	Modern
Na06	Muturu_Nigeria_1990s	MUTT	MUTT	MUTT03	AFT	African taurine	Bos taurus	Modern
Na07	Muturu_Nigeria_1990s	MUTT	MUTT	MUTT04	AFT	African taurine	Bos taurus	Modern
Na08	Muturu_Nigeria_1990s	MUTT	MUTT	MUTT05	AFT	African taurine	Bos taurus	Modern
Na09	Muturu_Nigeria_1990s	MUTT	MUTT	MUTT06	AFT	African taurine	Bos taurus	Modern
Na10	Muturu_Nigeria_1990s	MUTT	MUTT	MUTT07	AFT	African taurine	Bos taurus	Modern
Na11	Muturu_Nigeria_1990s	MUTT	MUTT	MUTT08	AFT	African taurine	Bos taurus	Modern
Na12	Muturu_Nigeria_1990s	MUTT	MUTT	MUTT09	AFT	African taurine	Bos taurus	Modern
Na13	Muturu_Nigeria_1990s	MUTT	MUTT	MUTT10	AFT	African taurine	Bos taurus	Modern
Na14	Muturu_Nigeria_1990s	MUTT	MUTT	MUTT11	AFT	African taurine	Bos taurus	Modern
Na15	Muturu_Nigeria_1990s	MUTT	MUTT	MUTT12	AFT	African taurine	Bos taurus	Modern
Na16	Muturu_Nigeria_1990s	MUTT	MUTT	MUTT13	AFT	African taurine	Bos taurus	Modern
Na17	Muturu_Nigeria_1990s	MUTT	MUTT	MUTT14	AFT	African taurine	Bos taurus	Modern
Na18	Muturu_Nigeria_1990s	MUTT	MUTT	MUTT15	AFT	African taurine	Bos taurus	Modern
Na19	Muturu_Nigeria_1990s	MUTT	MUTT	MUTT16	AFT	African taurine	Bos taurus	Modern
Na21	Muturu_Nigeria_1990s	MUTT	MUTT	MUTT17	AFT	African taurine	Bos taurus	Modern
Na22	Muturu_Nigeria_1990s	MUTT	MUTT	MUTT18	AFT	African taurine	Bos taurus	Modern
Na23	Muturu_Nigeria_1990s	MUTT	MUTT	MUTT19	AFT	African taurine	Bos taurus	Modern
Na24	Muturu_Nigeria_1990s	MUTT	MUTT	MUTT20	AFT	African taurine	Bos taurus	Modern
Na25	Muturu_Nigeria_1990s	MUTT	MUTT	MUTT21	AFT	African taurine	Bos taurus	Modern
Na26	Muturu_Nigeria_1990s	MUTT	MUTT	MUTT22	AFT	African taurine	Bos taurus	Modern
Na27	Muturu_Nigeria_1990s	MUTT	MUTT	MUTT23	AFT	African taurine	Bos taurus	Modern
Na28	Muturu_Nigeria_1990s	MUTT	MUTT	MUTT24	AFT	African taurine	Bos taurus	Modern
Na29	Muturu_Nigeria_1990s	MUTT	MUTT	MUTT25	AFT	African taurine	Bos taurus	Modern
Na30	Muturu_Nigeria_1990s	MUTT	MUTT	MUTT26	AFT	African taurine	Bos taurus	Modern
Na31	Muturu_Nigeria_1990s	MUTT	MUTT	MUTT27	AFT	African taurine	Bos taurus	Modern
Na32	Muturu_Nigeria_1990s	MUTT	MUTT	MUTT28	AFT	African taurine	Bos taurus	Modern
Na33	NDama_Guinea_1990s	NDAG	NDAG	NDAG11	AFT	African taurine	Bos taurus	Modern
Na34	NDama_Guinea_1990s	NDAG	NDAG	NDAG12	AFT	African taurine	Bos taurus	Modern
Na35	NDama_Guinea_1990s	NDAG	NDAG	NDAG13	AFT	African taurine	Bos taurus	Modern
Na36	NDama_Guinea_1990s	NDAG	NDAG	NDAG14	AFT	African taurine	Bos taurus	Modern
Na37	NDama_Guinea_1990s	NDAG	NDAG	NDAG15	AFT	African taurine	Bos taurus	Modern
Na38	NDama_Guinea_1990s	NDAG	NDAG	NDAG16	AFT	African taurine	Bos taurus	Modern
Na39	NDama_Guinea_1990s	NDAG	NDAG	NDAG17	AFT	African taurine	Bos taurus	Modern
Na41	NDama_Guinea_1990s	NDAG	NDAG	NDAG18	AFT	African taurine	Bos taurus	Modern
Na42	NDama_Guinea_1990s	NDAG	NDAG	NDAG19	AFT	African taurine	Bos taurus	Modern
Na43	NDama_Guinea_1990s	NDAG	NDAG	NDAG20	AFT	African taurine	Bos taurus	Modern
Na45	NDama_Guinea_1990s	NDAG	NDAG	NDAG21	AFT	African taurine	Bos taurus	Modern
Na46	NDama_Guinea_1990s	NDAG	NDAG	NDAG22	AFT	African taurine	Bos taurus	Modern
Na47	NDama_Guinea_1990s	NDAG	NDAG	NDAG23	AFT	African taurine	Bos taurus	Modern
Na48	NDama_Guinea_1990s	NDAG	NDAG	NDAG24	AFT	African taurine	Bos taurus	Modern
Na49	NDama_Guinea_1990s	NDAG	NDAG	NDAG25	AFT	African taurine	Bos taurus	Modern
Na50	NDama_Guinea_1990s	NDAG	NDAG	NDAG26	AFT	African taurine	Bos taurus	Modern
Na51	NDama_Guinea_1990s	NDAG	NDAG	NDAG27	AFT	African taurine	Bos taurus	Modern
Na52	NDama_Guinea_1990s	NDAG	NDAG	NDAG28	AFT	African taurine	Bos taurus	Modern
Na53	NDama_Guinea_1990s	NDAG	NDAG	NDAG29	AFT	African taurine	Bos taurus	Modern
Na54	NDama_Guinea_1990s	NDAG	NDAG	NDAG30	AFT	African taurine	Bos taurus	Modern
Na55	NDama_Guinea_1990s	NDAG	NDAG	NDAG31	AFT	African taurine	Bos taurus	Modern
NdaN11	NDama_Nigeria_1990s	NDNT	NDNT	NDNT09	AFT	African taurine	Bos taurus	Modern
NdaN12	NDama_Nigeria_1990s	NDNT	NDNT	NDNT10	AFT	African taurine	Bos taurus	Modern
NdaN13	NDama_Nigeria_1990s	NDNT	NDNT	NDNT11	AFT	African taurine	Bos taurus	Modern
NdaN14	NDama_Nigeria_1990s	NDNT	NDNT	NDNT12	AFT	African taurine	Bos taurus	Modern
NdaN2	NDama_Nigeria_1990s	NDNT	NDNT	NDNT02	AFT	African taurine	Bos taurus	Modern
NdaN3	NDama_Nigeria_1990s	NDNT	NDNT	NDNT03	AFT	African taurine	Bos taurus	Modern
NdaN34	NDama_Nigeria_1990s	NDNT	NDNT	NDNT13	AFT	African taurine	Bos taurus	Modern
NdaN4	NDama_Nigeria_1990s	NDNT	NDNT	NDNT04	AFT	African taurine	Bos taurus	Modern
NdaN5	NDama_Nigeria_1990s	NDNT	NDNT	NDNT05	AFT	African taurine	Bos taurus	Modern
NdaN58	NDama_Nigeria_1990s	NDNT	NDNT	NDNT14	AFT	African taurine	Bos taurus	Modern
NdaN6	NDama_Nigeria_1990s	NDNT	NDNT	NDNT06	AFT	African taurine	Bos taurus	Modern
NdaN61	NDama_Nigeria_1990s	NDNT	NDNT	NDNT15	AFT	African taurine	Bos taurus	Modern
NdaN7	NDama_Nigeria_1990s	NDNT	NDNT	NDNT07	AFT	African taurine	Bos taurus	Modern
NdaN9	NDama_Nigeria_1990s	NDNT	NDNT	NDNT08	AFT	African taurine	Bos taurus	Modern
NG01	Borgou	BORG	BORG	BORG31	AFS	African Sanga	Bos taurus/Bos indicus hybrid	Modern
NG02	Borgou	BORG	BORG	BORG32	AFS	African Sanga	Bos taurus/Bos indicus hybrid	Modern
NG05	Borgou	BORG	BORG	BORG33	AFS	African Sanga	Bos taurus/Bos indicus hybrid	Modern
NG06	Borgou	BORG	BORG	BORG34	AFS	African Sanga	Bos taurus/Bos indicus hybrid	Modern
NG07	Borgou	BORG	BORG	BORG35	AFS	African Sanga	Bos taurus/Bos indicus hybrid	Modern
NG09	Borgou	BORG	BORG	BORG36	AFS	African Sanga	Bos taurus/Bos indicus hybrid	Modern
NG11	Borgou	BORG	BORG	BORG37	AFS	African Sanga	Bos taurus/Bos indicus hybrid	Modern
NG13	Borgou	BORG	BORG	BORG38	AFS	African Sanga	Bos taurus/Bos indicus hybrid	Modern
NG14	Borgou	BORG	BORG	BORG39	AFS	African Sanga	Bos taurus/Bos indicus hybrid	Modern
NG15	Borgou	BORG	BORG	BORG40	AFS	African Sanga	Bos taurus/Bos indicus hybrid	Modern
NG18	Borgou	BORG	BORG	BORG41	AFS	African Sanga	Bos taurus/Bos indicus hybrid	Modern
NG19	Borgou	BORG	BORG	BORG42	AFS	African Sanga	Bos taurus/Bos indicus hybrid	Modern
NG20	Borgou	BORG	BORG	BORG43	AFS	African Sanga	Bos taurus/Bos indicus hybrid	Modern
NG21	Borgou	BORG	BORG	BORG44	AFS	African Sanga	Bos taurus/Bos indicus hybrid	Modern
NG22	Borgou	BORG	BORG	BORG45	AFS	African Sanga	Bos taurus/Bos indicus hybrid	Modern
NG24	Borgou	BORG	BORG	BORG46	AFS	African Sanga	Bos taurus/Bos indicus hybrid	Modern
NG25	Borgou	BORG	BORG	BORG47	AFS	African Sanga	Bos taurus/Bos indicus hybrid	Modern
NG26	Borgou	BORG	BORG	BORG48	AFS	African Sanga	Bos taurus/Bos indicus hybrid	Modern
NG28	Borgou	BORG	BORG	BORG49	AFS	African Sanga	Bos taurus/Bos indicus hybrid	Modern
NG29	Borgou	BORG	BORG	BORG50	AFS	African Sanga	Bos taurus/Bos indicus hybrid	Modern
NG30	Borgou	BORG	BORG	BORG51	AFS	African Sanga	Bos taurus/Bos indicus hybrid	Modern
NG31	Kuri	KRIT	KURI	KURI10	AFT	African taurine	Bos taurus	Modern
Ng32	Nguni	NGNT	NGUN	NGUN11	AFS	African Sanga	Bos taurus/Bos indicus hybrid	Modern
NG33	Kuri	KRIT	KURI	KURI11	AFT	African taurine	Bos taurus	Modern
NG34	Kuri	KRIT	KURI	KURI12	AFT	African taurine	Bos taurus	Modern
NG35	Kuri	KRIT	KURI	KURI13	AFT	African taurine	Bos taurus	Modern
NG36	Kuri	KRIT	KURI	KURI14	AFT	African taurine	Bos taurus	Modern
NG37	Kuri	KRIT	KURI	KURI15	AFT	African taurine	Bos taurus	Modern
NG39	Kuri	KRIT	KURI	KURI16	AFT	African taurine	Bos taurus	Modern
NG40	Kuri	KRIT	KURI	KURI17	AFT	African taurine	Bos taurus	Modern
NG41	Kuri	KRIT	KURI	KURI18	AFT	African taurine	Bos taurus	Modern
NG43	Kuri	KRIT	KURI	KURI19	AFT	African taurine	Bos taurus	Modern
NG44	Kuri	KRIT	KURI	KURI20	AFT	African taurine	Bos taurus	Modern
NG45	Kuri	KRIT	KURI	KURI21	AFT	African taurine	Bos taurus	Modern
NG46	Kuri	KRIT	KURI	KURI22	AFT	African taurine	Bos taurus	Modern
NG47	Kuri	KRIT	KURI	KURI23	AFT	African taurine	Bos taurus	Modern
NG48	Kuri	KRIT	KURI	KURI24	AFT	African taurine	Bos taurus	Modern
NG49	Kuri	KRIT	KURI	KURI37	AFT	African taurine	Bos taurus	Modern
NG51	Kuri	KRIT	KURI	KURI25	AFT	African taurine	Bos taurus	Modern
NG52	Kuri	KRIT	KURI	KURI26	AFT	African taurine	Bos taurus	Modern
NG53	Kuri	KRIT	KURI	KURI27	AFT	African taurine	Bos taurus	Modern
NG54	Kuri	KRIT	KURI	KURI28	AFT	African taurine	Bos taurus	Modern
NG55	Kuri	KRIT	KURI	KURI29	AFT	African taurine	Bos taurus	Modern
NG56	Kuri	KRIT	KURI	KURI30	AFT	African taurine	Bos taurus	Modern
NG57	Kuri	KRIT	KURI	KURI31	AFT	African taurine	Bos taurus	Modern
NG58	Kuri	KRIT	KURI	KURI32	AFT	African taurine	Bos taurus	Modern
NG60	Kuri	KRIT	KURI	KURI33	AFT	African taurine	Bos taurus	Modern
NG61	Kuri	KRIT	KURI	KURI34	AFT	African taurine	Bos taurus	Modern
NG62	Kuri	KRIT	KURI	KURI35	AFT	African taurine	Bos taurus	Modern
NG63	Kuri	KRIT	KURI	KURI36	AFT	African taurine	Bos taurus	Modern
Ng9	Nguni	NGNT	NGUN	NGUN10	AFS	African Sanga	Bos taurus/Bos indicus hybrid	Modern
Ngumi10	Nguni	NGNT	NGUN	NGUN12	AFS	African Sanga	Bos taurus/Bos indicus hybrid	Modern
Ngumi11	Nguni	NGNT	NGUN	NGUN13	AFS	African Sanga	Bos taurus/Bos indicus hybrid	Modern
NM10	NDama_Gambia_1990s	NDGT	NDGM	NDGM14	AFT	African taurine	Bos taurus	Modern
NM2	NDama_Gambia_1990s	NDGT	NDGM	NDGM07	AFT	African taurine	Bos taurus	Modern
NM4	NDama_Gambia_1990s	NDGT	NDGM	NDGM08	AFT	African taurine	Bos taurus	Modern
NM5	NDama_Gambia_1990s	NDGT	NDGM	NDGM09	AFT	African taurine	Bos taurus	Modern
NM53	NDama_Gambia_1990s	NDGT	NDGM	NDGM15	AFT	African taurine	Bos taurus	Modern
NM54	NDama_Gambia_1990s	NDGT	NDGM	NDGM16	AFT	African taurine	Bos taurus	Modern
NM55	NDama_Gambia_1990s	NDGT	NDGM	NDGM17	AFT	African taurine	Bos taurus	Modern
NM56	NDama_Gambia_1990s	NDGT	NDGM	NDGM18	AFT	African taurine	Bos taurus	Modern
NM57	NDama_Gambia_1990s	NDGT	NDGM	NDGM19	AFT	African taurine	Bos taurus	Modern
NM58	NDama_Gambia_1990s	NDGT	NDGM	NDGM20	AFT	African taurine	Bos taurus	Modern
NM59	NDama_Gambia_1990s	NDGT	NDGM	NDGM21	AFT	African taurine	Bos taurus	Modern
NM6	NDama_Gambia_1990s	NDGT	NDGM	NDGM10	AFT	African taurine	Bos taurus	Modern
NM60	NDama_Gambia_1990s	NDGT	NDGM	NDGM22	AFT	African taurine	Bos taurus	Modern
NM7	NDama_Gambia_1990s	NDGT	NDGM	NDGM11	AFT	African taurine	Bos taurus	Modern
NM8	NDama_Gambia_1990s	NDGT	NDGM	NDGM12	AFT	African taurine	Bos taurus	Modern
NM9	NDama_Gambia_1990s	NDGT	NDGM	NDGM13	AFT	African taurine	Bos taurus	Modern
NS10	NDama_Senegal_1990s	NDST	NDST	NDST31	AFT	African taurine	Bos taurus	Modern
NS15	NDama_Senegal_1990s	NDST	NDST	NDST32	AFT	African taurine	Bos taurus	Modern
NS16	NDama_Senegal_1990s	NDST	NDST	NDST33	AFT	African taurine	Bos taurus	Modern
NS17	NDama_Senegal_1990s	NDST	NDST	NDST34	AFT	African taurine	Bos taurus	Modern
NS18	NDama_Senegal_1990s	NDST	NDST	NDST35	AFT	African taurine	Bos taurus	Modern
NS19	NDama_Senegal_1990s	NDST	NDST	NDST36	AFT	African taurine	Bos taurus	Modern
NS2	NDama_Senegal_1990s	NDST	NDST	NDST23	AFT	African taurine	Bos taurus	Modern
NS20	NDama_Senegal_1990s	NDST	NDST	NDST37	AFT	African taurine	Bos taurus	Modern
NS21	NDama_Senegal_1990s	NDST	NDST	NDST38	AFT	African taurine	Bos taurus	Modern
NS22	NDama_Senegal_1990s	NDST	NDST	NDST39	AFT	African taurine	Bos taurus	Modern
NS23	NDama_Senegal_1990s	NDST	NDST	NDST40	AFT	African taurine	Bos taurus	Modern
NS24	NDama_Senegal_1990s	NDST	NDST	NDST41	AFT	African taurine	Bos taurus	Modern
NS25	NDama_Senegal_1990s	NDST	NDST	NDST42	AFT	African taurine	Bos taurus	Modern
NS26	NDama_Senegal_1990s	NDST	NDST	NDST43	AFT	African taurine	Bos taurus	Modern
NS27	NDama_Senegal_1990s	NDST	NDST	NDST44	AFT	African taurine	Bos taurus	Modern
NS28	NDama_Senegal_1990s	NDST	NDST	NDST45	AFT	African taurine	Bos taurus	Modern
NS29	NDama_Senegal_1990s	NDST	NDST	NDST46	AFT	African taurine	Bos taurus	Modern
NS3	NDama_Senegal_1990s	NDST	NDST	NDST24	AFT	African taurine	Bos taurus	Modern
NS30	NDama_Senegal_1990s	NDST	NDST	NDST47	AFT	African taurine	Bos taurus	Modern
NS31	NDama_Senegal_1990s	NDST	NDST	NDST48	AFT	African taurine	Bos taurus	Modern
NS32	NDama_Senegal_1990s	NDST	NDST	NDST49	AFT	African taurine	Bos taurus	Modern
NS33	NDama_Senegal_1990s	NDST	NDST	NDST50	AFT	African taurine	Bos taurus	Modern
NS34	NDama_Senegal_1990s	NDST	NDST	NDST51	AFT	African taurine	Bos taurus	Modern
NS36	NDama_Senegal_1990s	NDST	NDST	NDST52	AFT	African taurine	Bos taurus	Modern
NS37	NDama_Senegal_1990s	NDST	NDST	NDST53	AFT	African taurine	Bos taurus	Modern
NS38	NDama_Senegal_1990s	NDST	NDST	NDST54	AFT	African taurine	Bos taurus	Modern
NS39	NDama_Senegal_1990s	NDST	NDST	NDST55	AFT	African taurine	Bos taurus	Modern
NS4	NDama_Senegal_1990s	NDST	NDST	NDST25	AFT	African taurine	Bos taurus	Modern
NS40	NDama_Senegal_1990s	NDST	NDST	NDST56	AFT	African taurine	Bos taurus	Modern
NS41	NDama_Senegal_1990s	NDST	NDST	NDST57	AFT	African taurine	Bos taurus	Modern
NS42	NDama_Senegal_1990s	NDST	NDST	NDST58	AFT	African taurine	Bos taurus	Modern
NS44	NDama_Senegal_1990s	NDST	NDST	NDST59	AFT	African taurine	Bos taurus	Modern
NS45	NDama_Senegal_1990s	NDST	NDST	NDST60	AFT	African taurine	Bos taurus	Modern
NS46	NDama_Senegal_1990s	NDST	NDST	NDST02	AFT	African taurine	Bos taurus	Modern
NS47	NDama_Senegal_1990s	NDST	NDST	NDST03	AFT	African taurine	Bos taurus	Modern
NS48	NDama_Senegal_1990s	NDST	NDST	NDST04	AFT	African taurine	Bos taurus	Modern
NS49	NDama_Senegal_1990s	NDST	NDST	NDST05	AFT	African taurine	Bos taurus	Modern
NS5	NDama_Senegal_1990s	NDST	NDST	NDST26	AFT	African taurine	Bos taurus	Modern
NS50	NDama_Senegal_1990s	NDST	NDST	NDST06	AFT	African taurine	Bos taurus	Modern
NS52	NDama_Senegal_1990s	NDST	NDST	NDST07	AFT	African taurine	Bos taurus	Modern
NS53	NDama_Senegal_1990s	NDST	NDST	NDST08	AFT	African taurine	Bos taurus	Modern
NS54	NDama_Senegal_1990s	NDST	NDST	NDST09	AFT	African taurine	Bos taurus	Modern
NS55	NDama_Senegal_1990s	NDST	NDST	NDST10	AFT	African taurine	Bos taurus	Modern
NS56	NDama_Senegal_1990s	NDST	NDST	NDST11	AFT	African taurine	Bos taurus	Modern
NS57	NDama_Senegal_1990s	NDST	NDST	NDST12	AFT	African taurine	Bos taurus	Modern
NS58	NDama_Senegal_1990s	NDST	NDST	NDST13	AFT	African taurine	Bos taurus	Modern
NS59	NDama_Senegal_1990s	NDST	NDST	NDST14	AFT	African taurine	Bos taurus	Modern
NS6	NDama_Senegal_1990s	NDST	NDST	NDST27	AFT	African taurine	Bos taurus	Modern
NS60	NDama_Senegal_1990s	NDST	NDST	NDST15	AFT	African taurine	Bos taurus	Modern
NS61	NDama_Senegal_1990s	NDST	NDST	NDST16	AFT	African taurine	Bos taurus	Modern
NS63	NDama_Senegal_1990s	NDST	NDST	NDST17	AFT	African taurine	Bos taurus	Modern
NS64	NDama_Senegal_1990s	NDST	NDST	NDST18	AFT	African taurine	Bos taurus	Modern
NS65	NDama_Senegal_1990s	NDST	NDST	NDST19	AFT	African taurine	Bos taurus	Modern
NS66	NDama_Senegal_1990s	NDST	NDST	NDST20	AFT	African taurine	Bos taurus	Modern
NS67	NDama_Senegal_1990s	NDST	NDST	NDST21	AFT	African taurine	Bos taurus	Modern
NS7	NDama_Senegal_1990s	NDST	NDST	NDST28	AFT	African taurine	Bos taurus	Modern
NS74	NDama_Senegal_1990s	NDST	NDST	NDST22	AFT	African taurine	Bos taurus	Modern
NS8	NDama_Senegal_1990s	NDST	NDST	NDST29	AFT	African taurine	Bos taurus	Modern
NS9	NDama_Senegal_1990s	NDST	NDST	NDST30	AFT	African taurine	Bos taurus	Modern
p113418	Bonsmara	BONS	BONS	BONS43	SAC	South African Composite	Bos taurus/Bos indicus hybrid	Modern
p129	Bonsmara	BONS	BONS	BONS42	SAC	South African Composite	Bos taurus/Bos indicus hybrid	Modern
p16997	Tuli	TULI	TULI	TULI51	SAC	South African Composite	Bos taurus/Bos indicus hybrid	Modern
p1AAD11062	Drakensberger	DRAK	DRAK	DRAK40	SAC	South African Composite	Bos taurus/Bos indicus hybrid	Modern
p1BN07638	Nguni	NGUN	NGUN	NGUN53	AFS	African Sanga	Bos taurus/Bos indicus hybrid	Modern
p1DC12236	Afrikaner	AFRI	AFRI	AFRI47	AFS	African Sanga	Bos taurus/Bos indicus hybrid	Modern
p1DPN13085	Nguni	NGUN	NGUN	NGUN54	AFS	African Sanga	Bos taurus/Bos indicus hybrid	Modern
p1FD09022	Drakensberger	DRAK	DRAK	DRAK41	SAC	South African Composite	Bos taurus/Bos indicus hybrid	Modern
p1G10007	Tuli	TULI	TULI	TULI49	SAC	South African Composite	Bos taurus/Bos indicus hybrid	Modern
p1G13054	Tuli	TULI	TULI	TULI50	SAC	South African Composite	Bos taurus/Bos indicus hybrid	Modern
p1GJN15145	Bonsmara	BONS	BONS	BONS41	SAC	South African Composite	Bos taurus/Bos indicus hybrid	Modern
p1JA150049	Drakensberger	DRAK	DRAK	DRAK42	SAC	South African Composite	Bos taurus/Bos indicus hybrid	Modern
p1JLS1180	Mashona	MASH	MASH	MASH23	AFS	African Sanga	Bos taurus/Bos indicus hybrid	Modern
p1MC120266	Afrikaner	AFRI	AFRI	AFRI48	AFS	African Sanga	Bos taurus/Bos indicus hybrid	Modern
p1N1011	Nguni	NGUN	NGUN	NGUN55	AFS	African Sanga	Bos taurus/Bos indicus hybrid	Modern
p1WH13514	Afrikaner	AFRI	AFRI	AFRI49	AFS	African Sanga	Bos taurus/Bos indicus hybrid	Modern
PP1017	Afrikaner	AFRI	AFRI	AFRI32	AFS	African Sanga	Bos taurus/Bos indicus hybrid	Modern
PP1202	Afrikaner	AFRI	AFRI	AFRI33	AFS	African Sanga	Bos taurus/Bos indicus hybrid	Modern
PP1210	Afrikaner	AFRI	AFRI	AFRI34	AFS	African Sanga	Bos taurus/Bos indicus hybrid	Modern
PP1220	Afrikaner	AFRI	AFRI	AFRI35	AFS	African Sanga	Bos taurus/Bos indicus hybrid	Modern
PP1310	Afrikaner	AFRI	AFRI	AFRI36	AFS	African Sanga	Bos taurus/Bos indicus hybrid	Modern
R10045	Tuli	TULI	TULI	TULI48	SAC	South African Composite	Bos taurus/Bos indicus hybrid	Modern
RV0843	Nguni	NGUN	NGUN	NGUN41	AFS	African Sanga	Bos taurus/Bos indicus hybrid	Modern
RV1039	Nguni	NGUN	NGUN	NGUN42	AFS	African Sanga	Bos taurus/Bos indicus hybrid	Modern
RV1119	Nguni	NGUN	NGUN	NGUN43	AFS	African Sanga	Bos taurus/Bos indicus hybrid	Modern
RV1382	Nguni	NGUN	NGUN	NGUN44	AFS	African Sanga	Bos taurus/Bos indicus hybrid	Modern
RZ19	Raya_Zebu	RYAT	RAYA	RAYA07	AFI	African Indicine	Bos taurus/Bos indicus hybrid	Modern
RZ2	Raya_Zebu	RYAT	RAYA	RAYA04	AFI	African Indicine	Bos taurus/Bos indicus hybrid	Modern
RZ20	Raya_Zebu	RYAT	RAYA	RAYA08	AFI	African Indicine	Bos taurus/Bos indicus hybrid	Modern
RZ3	Raya_Zebu	RYAT	RAYA	RAYA05	AFI	African Indicine	Bos taurus/Bos indicus hybrid	Modern
RZ30	Raya_Zebu	RYAT	RAYA	RAYA09	AFI	African Indicine	Bos taurus/Bos indicus hybrid	Modern
RZ5	Raya_Zebu	RYAT	RAYA	RAYA06	AFI	African Indicine	Bos taurus/Bos indicus hybrid	Modern
S1	Somba	SOMB	SOMB	SOMB56	AFT	African taurine	Bos taurus	Modern
S1_L004	Tuli	TULI	TULI	TULI06	SAC	South African Composite	Bos taurus/Bos indicus hybrid	Modern
S100_L001	Tuli	TULI	TULI	TULI04	SAC	South African Composite	Bos taurus/Bos indicus hybrid	Modern
S101_L001	Tuli	TULI	TULI	TULI05	SAC	South African Composite	Bos taurus/Bos indicus hybrid	Modern
S2	Somba	SOMB	SOMB	SOMB57	AFT	African taurine	Bos taurus	Modern
S28	Somba	SOMB	SOMB	SOMB60	AFT	African taurine	Bos taurus	Modern
S29	Somba_Benin	SMBB	SMBB	SMBB01	AFT	African taurine	Bos taurus	Modern
S3	Somba	SOMB	SOMB	SOMB58	AFT	African taurine	Bos taurus	Modern
S30	Somba_Benin	SMBB	SMBB	SMBB02	AFT	African taurine	Bos taurus	Modern
S31	Somba_Benin	SMBB	SMBB	SMBB03	AFT	African taurine	Bos taurus	Modern
S32	Somba_Benin	SMBB	SMBB	SMBB04	AFT	African taurine	Bos taurus	Modern
S4	Somba	SOMB	SOMB	SOMB59	AFT	African taurine	Bos taurus	Modern
S56_L002	Mashona	MASH	MASH	MASH07	AFS	African Sanga	Bos taurus/Bos indicus hybrid	Modern
S57_L002	Mashona	MASH	MASH	MASH08	AFS	African Sanga	Bos taurus/Bos indicus hybrid	Modern
S58	Somba_Benin	SMBB	SMBB	SMBB05	AFT	African taurine	Bos taurus	Modern
S58_L002	Mashona	MASH	MASH	MASH09	AFS	African Sanga	Bos taurus/Bos indicus hybrid	Modern
S59_L002	Mashona	MASH	MASH	MASH10	AFS	African Sanga	Bos taurus/Bos indicus hybrid	Modern
S60	Somba_Benin	SMBB	SMBB	SMBB06	AFT	African taurine	Bos taurus	Modern
S60_L002	Mashona	MASH	MASH	MASH11	AFS	African Sanga	Bos taurus/Bos indicus hybrid	Modern
S62	Somba_Benin	SMBB	SMBB	SMBB07	AFT	African taurine	Bos taurus	Modern
S96_L001	Tuli	TULI	TULI	TULI07	SAC	South African Composite	Bos taurus/Bos indicus hybrid	Modern
S97_L001	Tuli	TULI	TULI	TULI08	SAC	South African Composite	Bos taurus/Bos indicus hybrid	Modern
S99_L001	Tuli	TULI	TULI	TULI09	SAC	South African Composite	Bos taurus/Bos indicus hybrid	Modern
SAcattle03_13	Nguni	NGUN	NGUN	NGUN45	AFS	African Sanga	Bos taurus/Bos indicus hybrid	Modern
SG03	Kuri	KRIT	KURI	KURI38	AFT	African taurine	Bos taurus	Modern
SG04	Kuri	KRIT	KURI	KURI39	AFT	African taurine	Bos taurus	Modern
SG05	Kuri	KRIT	KURI	KURI40	AFT	African taurine	Bos taurus	Modern
SG06	Kuri	KRIT	KURI	KURI41	AFT	African taurine	Bos taurus	Modern
SG07	Kuri	KRIT	KURI	KURI42	AFT	African taurine	Bos taurus	Modern
SG08	Kuri	KRIT	KURI	KURI43	AFT	African taurine	Bos taurus	Modern
SG09	Kuri	KRIT	KURI	KURI44	AFT	African taurine	Bos taurus	Modern
SG10	Kuri	KRIT	KURI	KURI45	AFT	African taurine	Bos taurus	Modern
SG11	Kuri	KRIT	KURI	KURI46	AFT	African taurine	Bos taurus	Modern
SG12	Kuri	KRIT	KURI	KURI47	AFT	African taurine	Bos taurus	Modern
SG13	Kuri	KRIT	KURI	KURI48	AFT	African taurine	Bos taurus	Modern
SG14	Kuri	KRIT	KURI	KURI49	AFT	African taurine	Bos taurus	Modern
SG15	Kuri	KRIT	KURI	KURI50	AFT	African taurine	Bos taurus	Modern
SG16	Kuri	KRIT	KURI	KURI51	AFT	African taurine	Bos taurus	Modern
SG17	Kapsiki	KAPS	KAPS	KAPS52	AFT	African taurine	Bos taurus	Modern
SG18	Kapsiki	KAPS	KAPS	KAPS51	AFT	African taurine	Bos taurus	Modern
SG19	Kapsiki	KAPS	KAPS	KAPS50	AFT	African taurine	Bos taurus	Modern
SG20	Kapsiki	KAPS	KAPS	KAPS49	AFT	African taurine	Bos taurus	Modern
SG21	NDama_Guinea_1990s	NDAG	NDAG	NDAG58	AFT	African taurine	Bos taurus	Modern
SG22	NDama_Guinea_1990s	NDAG	NDAG	NDAG59	AFT	African taurine	Bos taurus	Modern
SG23	NDama_Guinea_1990s	NDAG	NDAG	NDAG60	AFT	African taurine	Bos taurus	Modern
SG24	Sokoto_Gudali	SOKO	SOKO	SOKO04	AFS	African Sanga	Bos indicus	Modern
SG25	Sokoto_Gudali	SOKO	SOKO	SOKO05	AFS	African Sanga	Bos indicus	Modern
SG26	Sokoto_Gudali	SOKO	SOKO	SOKO06	AFS	African Sanga	Bos indicus	Modern
SG27	Sokoto_Gudali	SOKO	SOKO	SOKO07	AFS	African Sanga	Bos indicus	Modern
SG28	Sokoto_Gudali	SOKO	SOKO	SOKO09	AFS	African Sanga	Bos indicus	Modern
SG29	Sokoto_Gudali	SOKO	SOKO	SOKO08	AFS	African Sanga	Bos indicus	Modern
SG31	Sokoto_Gudali	SOKO	SOKO	SOKO10	AFS	African Sanga	Bos indicus	Modern
SG32	Sokoto_Gudali	SOKO	SOKO	SOKO11	AFS	African Sanga	Bos indicus	Modern
SG33	Sokoto_Gudali	SOKO	SOKO	SOKO12	AFS	African Sanga	Bos indicus	Modern
SG34	Sokoto_Gudali	SOKO	SOKO	SOKO13	AFS	African Sanga	Bos indicus	Modern
SG35	Sokoto_Gudali	SOKO	SOKO	SOKO14	AFS	African Sanga	Bos indicus	Modern
SG36	Sokoto_Gudali	SOKO	SOKO	SOKO15	AFS	African Sanga	Bos indicus	Modern
SG37	Sokoto_Gudali	SOKO	SOKO	SOKO16	AFS	African Sanga	Bos indicus	Modern
SG38	Sokoto_Gudali	SOKO	SOKO	SOKO17	AFS	African Sanga	Bos indicus	Modern
SG39	Sokoto_Gudali	SOKO	SOKO	SOKO18	AFS	African Sanga	Bos indicus	Modern
SG40	Sokoto_Gudali	SOKO	SOKO	SOKO19	AFS	African Sanga	Bos indicus	Modern
SG41	Sokoto_Gudali	SOKO	SOKO	SOKO20	AFS	African Sanga	Bos indicus	Modern
SG42	Sokoto_Gudali	SOKO	SOKO	SOKO21	AFS	African Sanga	Bos indicus	Modern
SG43	Sokoto_Gudali	SOKO	SOKO	SOKO43	AFS	African Sanga	Bos indicus	Modern
SG44	Sokoto_Gudali	SOKO	SOKO	SOKO44	AFS	African Sanga	Bos indicus	Modern
Sheko1	Sheko	SHKT	SHEK	SHEK10	AFS	African Sanga	Bos taurus/Bos indicus hybrid	Modern
Sheko3	Sheko	SHKT	SHEK	SHEK11	AFS	African Sanga	Bos taurus/Bos indicus hybrid	Modern
Sheko8	Sheko	SHKT	SHEK	SHEK12	AFS	African Sanga	Bos taurus/Bos indicus hybrid	Modern
SRR10532784	Belgian_Blue	BELG	BELG	BELG01	EUT	European taurine	Bos taurus	Modern
SRR10752668	Shorthorn	SHOR	SHOR	SHOR01	EUT	European taurine	Bos taurus	Modern
SRR10752669	Shorthorn	SHOR	SHOR	SHOR02	EUT	European taurine	Bos taurus	Modern
SRR10752670	Shorthorn	SHOR	SHOR	SHOR03	EUT	European taurine	Bos taurus	Modern
SRR10752671	Shorthorn	SHOR	SHOR	SHOR04	EUT	European taurine	Bos taurus	Modern
SRR10752672	Shorthorn	SHOR	SHOR	SHOR05	EUT	European taurine	Bos taurus	Modern
SRR10752673	Shorthorn	SHOR	SHOR	SHOR06	EUT	European taurine	Bos taurus	Modern
SRR10752674	Shorthorn	SHOR	SHOR	SHOR07	EUT	European taurine	Bos taurus	Modern
SRR10752675	Shorthorn	SHOR	SHOR	SHOR08	EUT	European taurine	Bos taurus	Modern
SRR10752676	Shorthorn	SHOR	SHOR	SHOR09	EUT	European taurine	Bos taurus	Modern
SRR10752677	Simmental	SIMM	SIMM	SIMM001	EUT	European taurine	Bos taurus	Modern
SRR10752678	Shorthorn	SHOR	SHOR	SHOR10	EUT	European taurine	Bos taurus	Modern
SRR10752679	Shorthorn	SHOR	SHOR	SHOR11	EUT	European taurine	Bos taurus	Modern
SRR10752680	Shorthorn	SHOR	SHOR	SHOR12	EUT	European taurine	Bos taurus	Modern
SRR10752681	Shorthorn	SHOR	SHOR	SHOR13	EUT	European taurine	Bos taurus	Modern
SRR10752682	Shorthorn	SHOR	SHOR	SHOR14	EUT	European taurine	Bos taurus	Modern
SRR10752683	Shorthorn	SHOR	SHOR	SHOR15	EUT	European taurine	Bos taurus	Modern
SRR10752684	Shorthorn	SHOR	SHOR	SHOR16	EUT	European taurine	Bos taurus	Modern
SRR10752685	Shorthorn	SHOR	SHOR	SHOR17	EUT	European taurine	Bos taurus	Modern
SRR10752686	Salers	SALE	SALE	SALE01	EUT	European taurine	Bos taurus	Modern
SRR10752687	Salers	SALE	SALE	SALE02	EUT	European taurine	Bos taurus	Modern
SRR10752688	Salers	SALE	SALE	SALE03	EUT	European taurine	Bos taurus	Modern
SRR10752689	Salers	SALE	SALE	SALE04	EUT	European taurine	Bos taurus	Modern
SRR10752690	Salers	SALE	SALE	SALE05	EUT	European taurine	Bos taurus	Modern
SRR10752691	Salers	SALE	SALE	SALE06	EUT	European taurine	Bos taurus	Modern
SRR10752692	Salers	SALE	SALE	SALE07	EUT	European taurine	Bos taurus	Modern
SRR10752693	Salers	SALE	SALE	SALE08	EUT	European taurine	Bos taurus	Modern
SRR10752696	Shorthorn	SHOR	SHOR	SHOR18	EUT	European taurine	Bos taurus	Modern
SRR10752697	Shorthorn	SHOR	SHOR	SHOR19	EUT	European taurine	Bos taurus	Modern
SRR10752698	Salers	SALE	SALE	SALE09	EUT	European taurine	Bos taurus	Modern
SRR10752699	Shorthorn	SHOR	SHOR	SHOR20	EUT	European taurine	Bos taurus	Modern
SRR10752700	Simmental	SIMM	SIMM	SIMM002	EUT	European taurine	Bos taurus	Modern
SRR10752701	Simmental	SIMM	SIMM	SIMM003	EUT	European taurine	Bos taurus	Modern
SRR12452185	Fogera	FOGE	FOGE	FOGE01	AFI	African Indicine	Bos taurus/Bos indicus hybrid	Modern
SRR12452186	Fogera	FOGE	FOGE	FOGE02	AFI	African Indicine	Bos taurus/Bos indicus hybrid	Modern
SRR12452187	Fogera	FOGE	FOGE	FOGE03	AFI	African Indicine	Bos taurus/Bos indicus hybrid	Modern
SRR12452188	Fogera	FOGE	FOGE	FOGE04	AFI	African Indicine	Bos taurus/Bos indicus hybrid	Modern
SRR12452189	Sheko	SHEK	SHEK	SHEK01	AFS	African Sanga	Bos taurus/Bos indicus hybrid	Modern
SRR12452190	Sheko	SHEK	SHEK	SHEK02	AFS	African Sanga	Bos taurus/Bos indicus hybrid	Modern
SRR12452191	Sheko	SHEK	SHEK	SHEK03	AFS	African Sanga	Bos taurus/Bos indicus hybrid	Modern
SRR12452192	Sheko	SHEK	SHEK	SHEK04	AFS	African Sanga	Bos taurus/Bos indicus hybrid	Modern
SRR12452193	Sheko	SHEK	SHEK	SHEK05	AFS	African Sanga	Bos taurus/Bos indicus hybrid	Modern
SRR12452194	Sheko	SHEK	SHEK	SHEK06	AFS	African Sanga	Bos taurus/Bos indicus hybrid	Modern
SRR12452195	Arsi	ARSI	ARSI	ARSI01	AFI	African Indicine	Bos indicus	Modern
SRR12452196	Sheko	SHEK	SHEK	SHEK07	AFS	African Sanga	Bos taurus/Bos indicus hybrid	Modern
SRR12452197	Sheko	SHEK	SHEK	SHEK08	AFS	African Sanga	Bos taurus/Bos indicus hybrid	Modern
SRR12452198	Sheko	SHEK	SHEK	SHEK09	AFS	African Sanga	Bos taurus/Bos indicus hybrid	Modern
SRR12452199	NDama_Gambia_Contemporary	NDGM	NDGM	NDGM01	AFT	African taurine	Bos taurus	Modern
SRR12452200	NDama_Gambia_Contemporary	NDGM	NDGM	NDGM02	AFT	African taurine	Bos taurus	Modern
SRR12452201	NDama_Gambia_Contemporary	NDGM	NDGM	NDGM03	AFT	African taurine	Bos taurus	Modern
SRR12452202	Afar	AFAR	AFAR	AFAR01	AFI	African Indicine	Bos taurus/Bos indicus hybrid	Modern
SRR12452203	Afar	AFAR	AFAR	AFAR02	AFI	African Indicine	Bos taurus/Bos indicus hybrid	Modern
SRR12452204	Afar	AFAR	AFAR	AFAR03	AFI	African Indicine	Bos taurus/Bos indicus hybrid	Modern
SRR12452205	Afar	AFAR	AFAR	AFAR04	AFI	African Indicine	Bos taurus/Bos indicus hybrid	Modern
SRR12452206	Afar	AFAR	AFAR	AFAR05	AFI	African Indicine	Bos taurus/Bos indicus hybrid	Modern
SRR12452207	Afar	AFAR	AFAR	AFAR06	AFI	African Indicine	Bos taurus/Bos indicus hybrid	Modern
SRR12452208	Afar	AFAR	AFAR	AFAR07	AFI	African Indicine	Bos taurus/Bos indicus hybrid	Modern
SRR12452209	Afar	AFAR	AFAR	AFAR08	AFI	African Indicine	Bos taurus/Bos indicus hybrid	Modern
SRR12452210	Afar	AFAR	AFAR	AFAR09	AFI	African Indicine	Bos taurus/Bos indicus hybrid	Modern
SRR12452211	Afar	AFAR	AFAR	AFAR10	AFI	African Indicine	Bos taurus/Bos indicus hybrid	Modern
SRR12452212	Mursi	MURS	MURS	MURS01	AFI	African Indicine	Bos indicus	Modern
SRR12452213	Mursi	MURS	MURS	MURS02	AFI	African Indicine	Bos indicus	Modern
SRR12452214	Mursi	MURS	MURS	MURS03	AFI	African Indicine	Bos indicus	Modern
SRR12452215	Mursi	MURS	MURS	MURS04	AFI	African Indicine	Bos indicus	Modern
SRR12452216	Mursi	MURS	MURS	MURS05	AFI	African Indicine	Bos indicus	Modern
SRR12452217	Arsi	ARSI	ARSI	ARSI02	AFI	African Indicine	Bos indicus	Modern
SRR12452218	Mursi	MURS	MURS	MURS06	AFI	African Indicine	Bos indicus	Modern
SRR12452219	Mursi	MURS	MURS	MURS07	AFI	African Indicine	Bos indicus	Modern
SRR12452220	Mursi	MURS	MURS	MURS08	AFI	African Indicine	Bos indicus	Modern
SRR12452221	Mursi	MURS	MURS	MURS09	AFI	African Indicine	Bos indicus	Modern
SRR12452222	Mursi	MURS	MURS	MURS10	AFI	African Indicine	Bos indicus	Modern
SRR12452223	Kenana	KENA	KENA	KENA01	AFI	African Indicine	Bos indicus	Modern
SRR12452224	Kenana	KENA	KENA	KENA02	AFI	African Indicine	Bos indicus	Modern
SRR12452225	Kenana	KENA	KENA	KENA03	AFI	African Indicine	Bos indicus	Modern
SRR12452226	Kenana	KENA	KENA	KENA04	AFI	African Indicine	Bos indicus	Modern
SRR12452227	Goffa	GOFF	GOFF	GOFF01	AFI	African Indicine	Bos indicus	Modern
SRR12452228	Arsi	ARSI	ARSI	ARSI03	AFI	African Indicine	Bos indicus	Modern
SRR12452229	Goffa	GOFF	GOFF	GOFF02	AFI	African Indicine	Bos indicus	Modern
SRR12452230	Goffa	GOFF	GOFF	GOFF03	AFI	African Indicine	Bos indicus	Modern
SRR12452231	Goffa	GOFF	GOFF	GOFF04	AFI	African Indicine	Bos indicus	Modern
SRR12452232	Goffa	GOFF	GOFF	GOFF05	AFI	African Indicine	Bos indicus	Modern
SRR12452233	Butana	BUTA	BUTA	BUTA01	AFI	African Indicine	Bos indicus	Modern
SRR12452234	Butana	BUTA	BUTA	BUTA02	AFI	African Indicine	Bos indicus	Modern
SRR12452235	Butana	BUTA	BUTA	BUTA03	AFI	African Indicine	Bos indicus	Modern
SRR12452236	Butana	BUTA	BUTA	BUTA04	AFI	African Indicine	Bos indicus	Modern
SRR12452237	Butana	BUTA	BUTA	BUTA05	AFI	African Indicine	Bos indicus	Modern
SRR12452238	Butana	BUTA	BUTA	BUTA06	AFI	African Indicine	Bos indicus	Modern
SRR12452239	Barka	BARK	BARK	BARK01	AFI	African Indicine	Bos indicus	Modern
SRR12452240	Arsi	ARSI	ARSI	ARSI04	AFI	African Indicine	Bos indicus	Modern
SRR12452241	Barka	BARK	BARK	BARK02	AFI	African Indicine	Bos indicus	Modern
SRR12452242	Barka	BARK	BARK	BARK03	AFI	African Indicine	Bos indicus	Modern
SRR12452243	Barka	BARK	BARK	BARK04	AFI	African Indicine	Bos indicus	Modern
SRR12452244	Barka	BARK	BARK	BARK05	AFI	African Indicine	Bos indicus	Modern
SRR12452245	Barka	BARK	BARK	BARK06	AFI	African Indicine	Bos indicus	Modern
SRR12452246	Barka	BARK	BARK	BARK07	AFI	African Indicine	Bos indicus	Modern
SRR12452247	Barka	BARK	BARK	BARK08	AFI	African Indicine	Bos indicus	Modern
SRR12452248	Barka	BARK	BARK	BARK09	AFI	African Indicine	Bos indicus	Modern
SRR12452249	Horro	HORR	HORR	HORR01	AFI	African Indicine	Bos taurus/Bos indicus hybrid	Modern
SRR12452250	Horro	HORR	HORR	HORR02	AFI	African Indicine	Bos taurus/Bos indicus hybrid	Modern
SRR12452251	Horro	HORR	HORR	HORR03	AFI	African Indicine	Bos taurus/Bos indicus hybrid	Modern
SRR12452252	Horro	HORR	HORR	HORR04	AFI	African Indicine	Bos taurus/Bos indicus hybrid	Modern
SRR12452253	Horro	HORR	HORR	HORR05	AFI	African Indicine	Bos taurus/Bos indicus hybrid	Modern
SRR12452254	Horro	HORR	HORR	HORR06	AFI	African Indicine	Bos taurus/Bos indicus hybrid	Modern
SRR12452255	Arsi	ARSI	ARSI	ARSI05	AFI	African Indicine	Bos indicus	Modern
SRR12452256	Horro	HORR	HORR	HORR07	AFI	African Indicine	Bos taurus/Bos indicus hybrid	Modern
SRR12452257	Horro	HORR	HORR	HORR08	AFI	African Indicine	Bos taurus/Bos indicus hybrid	Modern
SRR12452258	Horro	HORR	HORR	HORR09	AFI	African Indicine	Bos taurus/Bos indicus hybrid	Modern
SRR12452259	Horro	HORR	HORR	HORR10	AFI	African Indicine	Bos taurus/Bos indicus hybrid	Modern
SRR12452260	Horro	HORR	HORR	HORR11	AFI	African Indicine	Bos taurus/Bos indicus hybrid	Modern
SRR12452261	Fogera	FOGE	FOGE	FOGE05	AFI	African Indicine	Bos taurus/Bos indicus hybrid	Modern
SRR12452262	Fogera	FOGE	FOGE	FOGE06	AFI	African Indicine	Bos taurus/Bos indicus hybrid	Modern
SRR12452263	Fogera	FOGE	FOGE	FOGE24	AFI	African Indicine	Bos taurus/Bos indicus hybrid	Modern
SRR12452264	Fogera	FOGE	FOGE	FOGE07	AFI	African Indicine	Bos taurus/Bos indicus hybrid	Modern
SRR12452265	Goffa	GOFF	GOFF	GOFF06	AFI	African Indicine	Bos indicus	Modern
SRR12452266	Goffa	GOFF	GOFF	GOFF07	AFI	African Indicine	Bos indicus	Modern
SRR12452267	Goffa	GOFF	GOFF	GOFF08	AFI	African Indicine	Bos indicus	Modern
SRR12452268	Goffa	GOFF	GOFF	GOFF09	AFI	African Indicine	Bos indicus	Modern
SRR12452269	Goffa	GOFF	GOFF	GOFF10	AFI	African Indicine	Bos indicus	Modern
SRR12452270	Ethiopian_Boran	ETHI	ETHI	ETHI01	AFI	African Indicine	Bos indicus	Modern
SRR12452271	Arsi	ARSI	ARSI	ARSI06	AFI	African Indicine	Bos indicus	Modern
SRR12452272	Ethiopian_Boran	ETHI	ETHI	ETHI02	AFI	African Indicine	Bos indicus	Modern
SRR12452273	Ethiopian_Boran	ETHI	ETHI	ETHI03	AFI	African Indicine	Bos indicus	Modern
SRR12452274	Ethiopian_Boran	ETHI	ETHI	ETHI04	AFI	African Indicine	Bos indicus	Modern
SRR12452275	Ethiopian_Boran	ETHI	ETHI	ETHI05	AFI	African Indicine	Bos indicus	Modern
SRR12452276	Ethiopian_Boran	ETHI	ETHI	ETHI06	AFI	African Indicine	Bos indicus	Modern
SRR12452277	Ethiopian_Boran	ETHI	ETHI	ETHI07	AFI	African Indicine	Bos indicus	Modern
SRR12452278	Ethiopian_Boran	ETHI	ETHI	ETHI08	AFI	African Indicine	Bos indicus	Modern
SRR12452279	Ethiopian_Boran	ETHI	ETHI	ETHI09	AFI	African Indicine	Bos indicus	Modern
SRR12452280	Ethiopian_Boran	ETHI	ETHI	ETHI10	AFI	African Indicine	Bos indicus	Modern
SRR12452281	Butana	BUTA	BUTA	BUTA07	AFI	African Indicine	Bos indicus	Modern
SRR12452282	Arsi	ARSI	ARSI	ARSI07	AFI	African Indicine	Bos indicus	Modern
SRR12452283	Butana	BUTA	BUTA	BUTA08	AFI	African Indicine	Bos indicus	Modern
SRR12452284	Butana	BUTA	BUTA	BUTA09	AFI	African Indicine	Bos indicus	Modern
SRR12452285	Butana	BUTA	BUTA	BUTA10	AFI	African Indicine	Bos indicus	Modern
SRR12452286	Butana	BUTA	BUTA	BUTA11	AFI	African Indicine	Bos indicus	Modern
SRR12452287	Butana	BUTA	BUTA	BUTA12	AFI	African Indicine	Bos indicus	Modern
SRR12452288	Butana	BUTA	BUTA	BUTA13	AFI	African Indicine	Bos indicus	Modern
SRR12452289	Butana	BUTA	BUTA	BUTA14	AFI	African Indicine	Bos indicus	Modern
SRR12452290	Butana	BUTA	BUTA	BUTA15	AFI	African Indicine	Bos indicus	Modern
SRR12452291	Butana	BUTA	BUTA	BUTA16	AFI	African Indicine	Bos indicus	Modern
SRR12452292	Butana	BUTA	BUTA	BUTA17	AFI	African Indicine	Bos indicus	Modern
SRR12452293	Arsi	ARSI	ARSI	ARSI08	AFI	African Indicine	Bos indicus	Modern
SRR12452294	Butana	BUTA	BUTA	BUTA18	AFI	African Indicine	Bos indicus	Modern
SRR12452295	Butana	BUTA	BUTA	BUTA19	AFI	African Indicine	Bos indicus	Modern
SRR12452296	Butana	BUTA	BUTA	BUTA20	AFI	African Indicine	Bos indicus	Modern
SRR12452297	Fogera	FOGE	FOGE	FOGE08	AFI	African Indicine	Bos taurus/Bos indicus hybrid	Modern
SRR12452298	Arsi	ARSI	ARSI	ARSI09	AFI	African Indicine	Bos indicus	Modern
SRR12496220	Abergelle	ABER	ABER	ABER01	AFI	African Indicine	Bos indicus	Modern
SRR12496221	Abergelle	ABER	ABER	ABER02	AFI	African Indicine	Bos indicus	Modern
SRR12496222	Abergelle	ABER	ABER	ABER03	AFI	African Indicine	Bos indicus	Modern
SRR12496223	Abergelle	ABER	ABER	ABER04	AFI	African Indicine	Bos indicus	Modern
SRR12496224	Raya_Zebu	RAYA	RAYA	RAYA10	AFI	African Indicine	Bos indicus	Modern
SRR12496225	Raya_Zebu	RAYA	RAYA	RAYA11	AFI	African Indicine	Bos indicus	Modern
SRR12496226	Raya_Zebu	RAYA	RAYA	RAYA12	AFI	African Indicine	Bos indicus	Modern
SRR12496228	Raya_Zebu	RAYA	RAYA	RAYA13	AFI	African Indicine	Bos indicus	Modern
SRR12496229	Abergelle	ABER	ABER	ABER05	AFI	African Indicine	Bos indicus	Modern
SRR12496230	Raya_Zebu	RAYA	RAYA	RAYA14	AFI	African Indicine	Bos indicus	Modern
SRR12496231	Raya_Zebu	RAYA	RAYA	RAYA15	AFI	African Indicine	Bos indicus	Modern
SRR12496232	Raya_Zebu	RAYA	RAYA	RAYA16	AFI	African Indicine	Bos indicus	Modern
SRR12496233	Raya_Zebu	RAYA	RAYA	RAYA17	AFI	African Indicine	Bos indicus	Modern
SRR12496234	Raya_Zebu	RAYA	RAYA	RAYA18	AFI	African Indicine	Bos indicus	Modern
SRR12496235	Raya_Zebu	RAYA	RAYA	RAYA19	AFI	African Indicine	Bos indicus	Modern
SRR12496236	Erob	EROB	EROB	EROB01	AFI	African Indicine	Bos indicus	Modern
SRR12496238	Erob	EROB	EROB	EROB02	AFI	African Indicine	Bos indicus	Modern
SRR12496239	Erob	EROB	EROB	EROB03	AFI	African Indicine	Bos indicus	Modern
SRR12496240	Abergelle	ABER	ABER	ABER06	AFI	African Indicine	Bos indicus	Modern
SRR12496241	Erob	EROB	EROB	EROB04	AFI	African Indicine	Bos indicus	Modern
SRR12496242	Erob	EROB	EROB	EROB05	AFI	African Indicine	Bos indicus	Modern
SRR12496243	Erob	EROB	EROB	EROB06	AFI	African Indicine	Bos indicus	Modern
SRR12496244	Erob	EROB	EROB	EROB07	AFI	African Indicine	Bos indicus	Modern
SRR12496246	Erob	EROB	EROB	EROB08	AFI	African Indicine	Bos indicus	Modern
SRR12496247	Erob	EROB	EROB	EROB09	AFI	African Indicine	Bos indicus	Modern
SRR12496248	Begait	BEGA	BEGA	BEGA01	AFI	African Indicine	Bos indicus	Modern
SRR12496249	Begait	BEGA	BEGA	BEGA02	AFI	African Indicine	Bos indicus	Modern
SRR12496250	Begait	BEGA	BEGA	BEGA03	AFI	African Indicine	Bos indicus	Modern
SRR12496251	Abergelle	ABER	ABER	ABER07	AFI	African Indicine	Bos indicus	Modern
SRR12496252	Begait	BEGA	BEGA	BEGA04	AFI	African Indicine	Bos indicus	Modern
SRR12496253	Begait	BEGA	BEGA	BEGA05	AFI	African Indicine	Bos indicus	Modern
SRR12496254	Begait	BEGA	BEGA	BEGA06	AFI	African Indicine	Bos indicus	Modern
SRR12496255	Begait	BEGA	BEGA	BEGA07	AFI	African Indicine	Bos indicus	Modern
SRR12496256	Begait	BEGA	BEGA	BEGA08	AFI	African Indicine	Bos indicus	Modern
SRR12496257	Begait	BEGA	BEGA	BEGA09	AFI	African Indicine	Bos indicus	Modern
SRR12496258	Begait	BEGA	BEGA	BEGA10	AFI	African Indicine	Bos indicus	Modern
SRR12496259	Begait	BEGA	BEGA	BEGA11	AFI	African Indicine	Bos indicus	Modern
SRR12496260	Arado	ARAD	ARAD	ARAD10	AFI	African Indicine	Bos indicus	Modern
SRR12496261	Arado	ARAD	ARAD	ARAD11	AFI	African Indicine	Bos indicus	Modern
SRR12496262	Abergelle	ABER	ABER	ABER08	AFI	African Indicine	Bos indicus	Modern
SRR12496263	Arado	ARAD	ARAD	ARAD12	AFI	African Indicine	Bos indicus	Modern
SRR12496264	Arado	ARAD	ARAD	ARAD13	AFI	African Indicine	Bos indicus	Modern
SRR12496265	Arado	ARAD	ARAD	ARAD14	AFI	African Indicine	Bos indicus	Modern
SRR12496266	Arado	ARAD	ARAD	ARAD15	AFI	African Indicine	Bos indicus	Modern
SRR12496269	Arado	ARAD	ARAD	ARAD16	AFI	African Indicine	Bos indicus	Modern
SRR12496270	Arado	ARAD	ARAD	ARAD17	AFI	African Indicine	Bos indicus	Modern
SRR12496271	Arado	ARAD	ARAD	ARAD18	AFI	African Indicine	Bos indicus	Modern
SRR12496272	Abergelle	ABER	ABER	ABER09	AFI	African Indicine	Bos indicus	Modern
SRR12496273	Abergelle	ABER	ABER	ABER10	AFI	African Indicine	Bos indicus	Modern
SRR12496274	Abergelle	ABER	ABER	ABER11	AFI	African Indicine	Bos indicus	Modern
SRR12538828	Fogera	FOGE	FOGE	FOGE25	AFI	African Indicine	Bos indicus	Modern
SRR12538829	Ethiopian_Boran	ETHI	ETHI	ETHI31	AFI	African Indicine	Bos indicus	Modern
SRR12538830	Ethiopian_Boran	ETHI	ETHI	ETHI32	AFI	African Indicine	Bos indicus	Modern
SRR12538831	Ethiopian_Boran	ETHI	ETHI	ETHI33	AFI	African Indicine	Bos indicus	Modern
SRR12538832	Arsi	ARSI	ARSI	ARSI10	AFI	African Indicine	Bos indicus	Modern
SRR12538833	Arsi	ARSI	ARSI	ARSI11	AFI	African Indicine	Bos indicus	Modern
SRR12538834	Afar	AFAR	AFAR	AFAR16	AFI	African Indicine	Bos indicus	Modern
SRR12538835	Afar	AFAR	AFAR	AFAR17	AFI	African Indicine	Bos indicus	Modern
SRR12538836	Afar	AFAR	AFAR	AFAR18	AFI	African Indicine	Bos indicus	Modern
SRR12538837	Afar	AFAR	AFAR	AFAR19	AFI	African Indicine	Bos indicus	Modern
SRR12538838	Afar	AFAR	AFAR	AFAR20	AFI	African Indicine	Bos indicus	Modern
SRR12538840	Arsi	ARSI	ARSI	ARSI12	AFI	African Indicine	Bos indicus	Modern
SRR12538841	Choke	CHOK	CHOK	CHOK03	AFI	African Indicine	Bos indicus	Modern
SRR12538842	Choke	CHOK	CHOK	CHOK01	AFI	African Indicine	Bos indicus	Modern
SRR12538843	Choke	CHOK	CHOK	CHOK02	AFI	African Indicine	Bos indicus	Modern
SRR12538844	Semien	SEMI	SEMI	SEMI11	AFI	African Indicine	Bos indicus	Modern
SRR12538845	Semien	SEMI	SEMI	SEMI12	AFI	African Indicine	Bos indicus	Modern
SRR12538846	Semien	SEMI	SEMI	SEMI13	AFI	African Indicine	Bos indicus	Modern
SRR12538847	Semien	SEMI	SEMI	SEMI14	AFI	African Indicine	Bos indicus	Modern
SRR12538848	Semien	SEMI	SEMI	SEMI15	AFI	African Indicine	Bos indicus	Modern
SRR12538849	Semien	SEMI	SEMI	SEMI16	AFI	African Indicine	Bos indicus	Modern
SRR12538850	Bagaria	BAGA	BAGA	BAGA11	AFI	African Indicine	Bos indicus	Modern
SRR12538851	Arsi	ARSI	ARSI	ARSI13	AFI	African Indicine	Bos indicus	Modern
SRR12538852	Bale	BALE	BALE	BALE11	AFI	African Indicine	Bos indicus	Modern
SRR12538853	Mursi	MURS	MURS	MURS11	AFI	African Indicine	Bos indicus	Modern
SRR12538854	Horro	HORR	HORR	HORR12	AFI	African Indicine	Bos indicus	Modern
SRR12538855	Horro	HORR	HORR	HORR13	AFI	African Indicine	Bos indicus	Modern
SRR12538856	Horro	HORR	HORR	HORR14	AFI	African Indicine	Bos indicus	Modern
SRR12538857	Goffa	GOFF	GOFF	GOFF11	AFI	African Indicine	Bos indicus	Modern
SRR12538858	Goffa	GOFF	GOFF	GOFF12	AFI	African Indicine	Bos indicus	Modern
SRR12538859	Goffa	GOFF	GOFF	GOFF13	AFI	African Indicine	Bos indicus	Modern
SRR12538860	Goffa	GOFF	GOFF	GOFF14	AFI	African Indicine	Bos indicus	Modern
SRR12538861	Goffa	GOFF	GOFF	GOFF15	AFI	African Indicine	Bos indicus	Modern
SRR12538862	Afar	AFAR	AFAR	AFAR21	AFI	African Indicine	Bos indicus	Modern
SRR12538863	Afar	AFAR	AFAR	AFAR22	AFI	African Indicine	Bos indicus	Modern
SRR12560200	Bangladesh	BANG	BANG	BANG01	ASI	Indicine	Bos indicus	Modern
SRR12560212	Bangladesh	BANG	BANG	BANG02	ASI	Indicine	Bos indicus	Modern
SRR12560232	Burma	BURM	BURM	BURM05	ASI	Indicine	Bos indicus	Modern
SRR12560233	Burma	BURM	BURM	BURM06	ASI	Indicine	Bos indicus	Modern
SRR12560234	Bangladesh	BANG	BANG	BANG03	ASI	Indicine	Bos indicus	Modern
SRR12560235	Burma	BURM	BURM	BURM07	ASI	Indicine	Bos indicus	Modern
SRR12560236	Burma	BURM	BURM	BURM08	ASI	Indicine	Bos indicus	Modern
SRR12560237	Burma	BURM	BURM	BURM09	ASI	Indicine	Bos indicus	Modern
SRR12560238	Burma	BURM	BURM	BURM10	ASI	Indicine	Bos indicus	Modern
SRR12560246	Bangladesh	BANG	BANG	BANG04	ASI	Indicine	Bos indicus	Modern
SRR12578330	Thawalam	THAW	THAW	THAW01	ASI	Indicine	Bos indicus	Modern
SRR12578331	Thawalam	THAW	THAW	THAW02	ASI	Indicine	Bos indicus	Modern
SRR12578332	Thawalam	THAW	THAW	THAW03	ASI	Indicine	Bos indicus	Modern
SRR12578333	Thawalam	THAW	THAW	THAW04	ASI	Indicine	Bos indicus	Modern
SRR12578342	Thawalam	THAW	THAW	THAW05	ASI	Indicine	Bos indicus	Modern
SRR12578343	Thawalam	THAW	THAW	THAW06	ASI	Indicine	Bos indicus	Modern
SRR12578344	Thawalam	THAW	THAW	THAW07	ASI	Indicine	Bos indicus	Modern
SRR12578345	Thawalam	THAW	THAW	THAW08	ASI	Indicine	Bos indicus	Modern
SRR12578346	Thawalam	THAW	THAW	THAW09	ASI	Indicine	Bos indicus	Modern
SRR12578347	Thawalam	THAW	THAW	THAW10	ASI	Indicine	Bos indicus	Modern
SRR12578348	Thawalam	THAW	THAW	THAW11	ASI	Indicine	Bos indicus	Modern
SRR12578350	Thawalam	THAW	THAW	THAW12	ASI	Indicine	Bos indicus	Modern
SRR12578351	Thawalam	THAW	THAW	THAW13	ASI	Indicine	Bos indicus	Modern
SRR12578352	Thawalam	THAW	THAW	THAW14	ASI	Indicine	Bos indicus	Modern
SRR12578353	Thawalam	THAW	THAW	THAW15	ASI	Indicine	Bos indicus	Modern
SRR12578354	Thawalam	THAW	THAW	THAW16	ASI	Indicine	Bos indicus	Modern
SRR12578355	Thawalam	THAW	THAW	THAW17	ASI	Indicine	Bos indicus	Modern
SRR12578356	Thawalam	THAW	THAW	THAW18	ASI	Indicine	Bos indicus	Modern
SRR12578357	Thawalam	THAW	THAW	THAW19	ASI	Indicine	Bos indicus	Modern
SRR12578358	Thawalam	THAW	THAW	THAW20	ASI	Indicine	Bos indicus	Modern
SRR12578359	Thawalam	THAW	THAW	THAW21	ASI	Indicine	Bos indicus	Modern
SRR12578360	Thawalam	THAW	THAW	THAW22	ASI	Indicine	Bos indicus	Modern
SRR1262742	Holstein	HOLS	HOLS	HOLS092	EUT	European taurine	Bos taurus	Modern
SRR12632066	Bhagnari	BHAG	BHAG	BHAG08	ASI	Indicine	Bos indicus	Modern
SRR12632067	Bhagnari	BHAG	BHAG	BHAG09	ASI	Indicine	Bos indicus	Modern
SRR12632068	NariMaster	NARI	NARI	NARI01	ASI	Indicine	Bos indicus	Modern
SRR12632069	Bhagnari	BHAG	BHAG	BHAG10	ASI	Indicine	Bos indicus	Modern
SRR12632071	Bhagnari	BHAG	BHAG	BHAG11	ASI	Indicine	Bos indicus	Modern
SRR12632073	Dhanni	DHAN	DHAN	DHAN08	ASI	Indicine	Bos indicus	Modern
SRR12632074	Dhanni	DHAN	DHAN	DHAN09	ASI	Indicine	Bos indicus	Modern
SRR12632075	Dhanni	DHAN	DHAN	DHAN10	ASI	Indicine	Bos indicus	Modern
SRR12632076	Achai	ACHA	ACHA	ACHA07	ASI	Indicine	Bos indicus	Modern
SRR12632077	Tharparkar	THAR	THAR	THAR04	ASI	Indicine	Bos indicus	Modern
SRR12632078	Dajal	DAJA	DAJA	DAJA07	ASI	Indicine	Bos indicus	Modern
SRR12632079	Cholistani	CHOL	CHOL	CHOL07	ASI	Indicine	Bos indicus	Modern
SRR12632080	Bhagnari	BHAG	BHAG	BHAG12	ASI	Indicine	Bos indicus	Modern
SRR12632081	Cholistani	CHOL	CHOL	CHOL08	ASI	Indicine	Bos indicus	Modern
SRR12632082	Red_Sindhi	REDS	REDS	REDS06	ASI	Indicine	Bos indicus	Modern
SRR12632083	Sahiwal	SAHI	SAHI	SAHI07	ASI	Indicine	Bos indicus	Modern
SRR12632084	Gabrialli	GABR	GABR	GABR03	ASI	Indicine	Bos indicus	Modern
SRR12632085	Sahiwal	SAHI	SAHI	SAHI08	ASI	Indicine	Bos indicus	Modern
SRR12632086	Red_Sindhi	REDS	REDS	REDS07	ASI	Indicine	Bos indicus	Modern
SRR12632087	Lohani	LOHA	LOHA	LOHA02	ASI	Indicine	Bos indicus	Modern
SRR12632089	Achai	ACHA	ACHA	ACHA08	ASI	Indicine	Bos indicus	Modern
SRR12632091	Dhanni	DHAN	DHAN	DHAN11	ASI	Indicine	Bos indicus	Modern
SRR12632092	Dhanni	DHAN	DHAN	DHAN12	ASI	Indicine	Bos indicus	Modern
SRR12632093	Red_Sindhi	REDS	REDS	REDS08	ASI	Indicine	Bos indicus	Modern
SRR12632095	Achai	ACHA	ACHA	ACHA09	ASI	Indicine	Bos indicus	Modern
SRR12632096	Tharparkar	THAR	THAR	THAR05	ASI	Indicine	Bos indicus	Modern
SRR12632097	Tharparkar	THAR	THAR	THAR06	ASI	Indicine	Bos indicus	Modern
SRR12632098	Tharparkar	THAR	THAR	THAR07	ASI	Indicine	Bos indicus	Modern
SRR12632100	Gabrialli	GABR	GABR	GABR04	ASI	Indicine	Bos indicus	Modern
SRR12632101	Dajal	DAJA	DAJA	DAJA08	ASI	Indicine	Bos indicus	Modern
SRR12632102	Dajal	DAJA	DAJA	DAJA09	ASI	Indicine	Bos indicus	Modern
SRR12632103	Dajal	DAJA	DAJA	DAJA10	ASI	Indicine	Bos indicus	Modern
SRR12632104	Red_Sindhi	REDS	REDS	REDS09	ASI	Indicine	Bos indicus	Modern
SRR12632105	Dajal	DAJA	DAJA	DAJA11	ASI	Indicine	Bos indicus	Modern
SRR12632106	Cholistani	CHOL	CHOL	CHOL09	ASI	Indicine	Bos indicus	Modern
SRR12632107	Cholistani	CHOL	CHOL	CHOL10	ASI	Indicine	Bos indicus	Modern
SRR12632108	Sahiwal	SAHI	SAHI	SAHI09	ASI	Indicine	Bos indicus	Modern
SRR12632109	Sahiwal	SAHI	SAHI	SAHI10	ASI	Indicine	Bos indicus	Modern
SRR12632110	Sahiwal	SAHI	SAHI	SAHI11	ASI	Indicine	Bos indicus	Modern
SRR12632111	Sahiwal	SAHI	SAHI	SAHI12	ASI	Indicine	Bos indicus	Modern
SRR12632115	Red_Sindhi	REDS	REDS	REDS10	ASI	Indicine	Bos indicus	Modern
SRR13114472	Leiqiong	LEIQ	LEIQ	LEIQ04	ASI	Indicine	Bos indicus	Modern
SRR13114473	Leiqiong	LEIQ	LEIQ	LEIQ05	ASI	Indicine	Bos indicus	Modern
SRR13114474	Leiqiong	LEIQ	LEIQ	LEIQ06	ASI	Indicine	Bos indicus	Modern
SRR13114475	Leiqiong	LEIQ	LEIQ	LEIQ07	ASI	Indicine	Bos indicus	Modern
SRR13114476	Leiqiong	LEIQ	LEIQ	LEIQ08	ASI	Indicine	Bos indicus	Modern
SRR13114477	Leiqiong	LEIQ	LEIQ	LEIQ09	ASI	Indicine	Bos indicus	Modern
SRR13114482	Yiling	YILI	YILI	YILI01	ASI	Indicine	Bos taurus/Bos indicus hybrid	Modern
SRR13114483	Leiqiong	LEIQ	LEIQ	LEIQ10	ASI	Indicine	Bos indicus	Modern
SRR13114485	Yiling	YILI	YILI	YILI02	ASI	Indicine	Bos taurus/Bos indicus hybrid	Modern
SRR13114488	Yiling	YILI	YILI	YILI03	ASI	Indicine	Bos taurus/Bos indicus hybrid	Modern
SRR13114489	Yiling	YILI	YILI	YILI04	ASI	Indicine	Bos taurus/Bos indicus hybrid	Modern
SRR13114490	Yiling	YILI	YILI	YILI05	ASI	Indicine	Bos taurus/Bos indicus hybrid	Modern
SRR13114491	Yiling	YILI	YILI	YILI06	ASI	Indicine	Bos taurus/Bos indicus hybrid	Modern
SRR13114492	Leiqiong	LEIQ	LEIQ	LEIQ11	ASI	Indicine	Bos indicus	Modern
SRR13114494	Leiqiong	LEIQ	LEIQ	LEIQ12	ASI	Indicine	Bos indicus	Modern
SRR13114495	Leiqiong	LEIQ	LEIQ	LEIQ13	ASI	Indicine	Bos indicus	Modern
SRR13114508	Dhanni	DHAN	DHAN	DHAN03	ASI	Indicine	Bos indicus	Modern
SRR13114509	Cholistani	CHOL	CHOL	CHOL02	ASI	Indicine	Bos indicus	Modern
SRR13114510	Cholistani	CHOL	CHOL	CHOL03	ASI	Indicine	Bos indicus	Modern
SRR13114511	Cholistani	CHOL	CHOL	CHOL04	ASI	Indicine	Bos indicus	Modern
SRR13114512	Cholistani	CHOL	CHOL	CHOL05	ASI	Indicine	Bos indicus	Modern
SRR13114513	Cholistani	CHOL	CHOL	CHOL06	ASI	Indicine	Bos indicus	Modern
SRR13114514	Bhagnari	BHAG	BHAG	BHAG04	ASI	Indicine	Bos indicus	Modern
SRR13114515	Bhagnari	BHAG	BHAG	BHAG05	ASI	Indicine	Bos indicus	Modern
SRR13114516	Bhagnari	BHAG	BHAG	BHAG06	ASI	Indicine	Bos indicus	Modern
SRR13114518	Bhagnari	BHAG	BHAG	BHAG07	ASI	Indicine	Bos indicus	Modern
SRR13114519	Achai	ACHA	ACHA	ACHA03	ASI	Indicine	Bos indicus	Modern
SRR13114520	Achai	ACHA	ACHA	ACHA04	ASI	Indicine	Bos indicus	Modern
SRR13114521	Achai	ACHA	ACHA	ACHA05	ASI	Indicine	Bos indicus	Modern
SRR13114523	Achai	ACHA	ACHA	ACHA06	ASI	Indicine	Bos indicus	Modern
SRR13114524	Sahiwal	SAHI	SAHI	SAHI04	ASI	Indicine	Bos indicus	Modern
SRR13114527	Lohani	LOHA	LOHA	LOHA01	ASI	Indicine	Bos indicus	Modern
SRR13114529	Tharparkar	THAR	THAR	THAR02	ASI	Indicine	Bos indicus	Modern
SRR13114530	Tharparkar	THAR	THAR	THAR03	ASI	Indicine	Bos indicus	Modern
SRR13114531	Red_Sindhi	REDS	REDS	REDS02	ASI	Indicine	Bos indicus	Modern
SRR13114532	Red_Sindhi	REDS	REDS	REDS03	ASI	Indicine	Bos indicus	Modern
SRR13114533	Red_Sindhi	REDS	REDS	REDS04	ASI	Indicine	Bos indicus	Modern
SRR13114534	Red_Sindhi	REDS	REDS	REDS05	ASI	Indicine	Bos indicus	Modern
SRR13114535	Sahiwal	SAHI	SAHI	SAHI05	ASI	Indicine	Bos indicus	Modern
SRR13114537	Dajal	DAJA	DAJA	DAJA02	ASI	Indicine	Bos indicus	Modern
SRR13114538	Dajal	DAJA	DAJA	DAJA03	ASI	Indicine	Bos indicus	Modern
SRR13114539	Dajal	DAJA	DAJA	DAJA04	ASI	Indicine	Bos indicus	Modern
SRR13114540	Dajal	DAJA	DAJA	DAJA05	ASI	Indicine	Bos indicus	Modern
SRR13114541	Dajal	DAJA	DAJA	DAJA06	ASI	Indicine	Bos indicus	Modern
SRR13114542	Dhanni	DHAN	DHAN	DHAN04	ASI	Indicine	Bos indicus	Modern
SRR13114543	Dhanni	DHAN	DHAN	DHAN05	ASI	Indicine	Bos indicus	Modern
SRR13114544	Dhanni	DHAN	DHAN	DHAN06	ASI	Indicine	Bos indicus	Modern
SRR13114545	Dhanni	DHAN	DHAN	DHAN07	ASI	Indicine	Bos indicus	Modern
SRR13114546	Sahiwal	SAHI	SAHI	SAHI06	ASI	Indicine	Bos indicus	Modern
SRR1343160	Hereford	HERE	HERE	HERE001	EUT	European taurine	Bos taurus	Modern
SRR1343161	Gelbvieh	GELB	GELB	GELB001	EUT	European taurine	Bos taurus	Modern
SRR1343162	Gelbvieh	GELB	GELB	GELB002	EUT	European taurine	Bos taurus	Modern
SRR1343163	Hereford	HERE	HERE	HERE002	EUT	European taurine	Bos taurus	Modern
SRR1343164	Gelbvieh	GELB	GELB	GELB003	EUT	European taurine	Bos taurus	Modern
SRR1343165	Gelbvieh	GELB	GELB	GELB113	EUT	European taurine	Bos taurus	Modern
SRR1343166	Gelbvieh	GELB	GELB	GELB004	EUT	European taurine	Bos taurus	Modern
SRR1343167	Charolais	CHAR	CHAR	CHAR002	EUT	European taurine	Bos taurus	Modern
SRR1343168	Charolais	CHAR	CHAR	CHAR003	EUT	European taurine	Bos taurus	Modern
SRR1343170	Red_Angus	REDA	REDA	REDA01	EUT	European taurine	Bos taurus	Modern
SRR1343171	Charolais	CHAR	CHAR	CHAR004	EUT	European taurine	Bos taurus	Modern
SRR1343172	Red_Angus	REDA	REDA	REDA02	EUT	European taurine	Bos taurus	Modern
SRR1343173	Charolais	CHAR	CHAR	CHAR005	EUT	European taurine	Bos taurus	Modern
SRR1343174	Angus	ANGU	ANGU	ANGU001	EUT	European taurine	Bos taurus	Modern
SRR1346376	Angus	ANGU	ANGU	ANGU002	EUT	European taurine	Bos taurus	Modern
SRR1346377	Composite	COMP	COMP	COMP01	EUT	European taurine	Bos taurus/Bos indicus hybrid	Modern
SRR1346378	Devon	DEVO	DEVO	DEVO01	EUT	European taurine	Bos taurus	Modern
SRR1346380	Hereford	HERE	HERE	HERE164	EUT	European taurine	Bos taurus	Modern
SRR1346381	Hereford	HERE	HERE	HERE003	EUT	European taurine	Bos taurus	Modern
SRR1346382	Hereford	HERE	HERE	HERE004	EUT	European taurine	Bos taurus	Modern
SRR1346383	Hereford	HERE	HERE	HERE005	EUT	European taurine	Bos taurus	Modern
SRR1346385	Hereford	HERE	HERE	HERE006	EUT	European taurine	Bos taurus	Modern
SRR1346386	Holstein	HOLS	HOLS	HOLS114	EUT	European taurine	Bos taurus	Modern
SRR1346387	Hereford	HERE	HERE	HERE007	EUT	European taurine	Bos taurus	Modern
SRR1346388	Gelbvieh	GELB	GELB	GELB005	EUT	European taurine	Bos taurus	Modern
SRR1346389	Holstein	HOLS	HOLS	HOLS010	EUT	European taurine	Bos taurus	Modern
SRR1346390	Holstein	HOLS	HOLS	HOLS011	EUT	European taurine	Bos taurus	Modern
SRR1346391	Angus	ANGU	ANGU	ANGU003	EUT	European taurine	Bos taurus	Modern
SRR1346392	Holstein	HOLS	HOLS	HOLS115	EUT	European taurine	Bos taurus	Modern
SRR1348569	Composite	COMP	COMP	COMP02	EUT	European taurine	Bos taurus/Bos indicus hybrid	Modern
SRR1348570	Composite	COMP	COMP	COMP03	EUT	European taurine	Bos taurus/Bos indicus hybrid	Modern
SRR1348571	Charolais	CHAR	CHAR	CHAR006	EUT	European taurine	Bos taurus	Modern
SRR1348573	Angus	ANGU	ANGU	ANGU004	EUT	European taurine	Bos taurus	Modern
SRR1348574	Charolais	CHAR	CHAR	CHAR007	EUT	European taurine	Bos taurus	Modern
SRR1348575	Gelbvieh	GELB	GELB	GELB006	EUT	European taurine	Bos taurus	Modern
SRR1348577	Charolais	CHAR	CHAR	CHAR001	EUT	European taurine	Bos taurus	Modern
SRR1348578	Charolais	CHAR	CHAR	CHAR008	EUT	European taurine	Bos taurus	Modern
SRR1348579	Composite	COMP	COMP	COMP04	EUT	European taurine	Bos taurus/Bos indicus hybrid	Modern
SRR1348580	Angus	ANGU	ANGU	ANGU005	EUT	European taurine	Bos taurus	Modern
SRR1348581	Angus	ANGU	ANGU	ANGU006	EUT	European taurine	Bos taurus	Modern
SRR1348582	Composite	COMP	COMP	COMP05	EUT	European taurine	Bos taurus/Bos indicus hybrid	Modern
SRR1348583	Holstein	HOLS	HOLS	HOLS116	EUT	European taurine	Bos taurus	Modern
SRR1348584	Charolais	CHAR	CHAR	CHAR009	EUT	European taurine	Bos taurus	Modern
SRR1348585	Composite	COMP	COMP	COMP20	EUT	European taurine	Bos taurus/Bos indicus hybrid	Modern
SRR1348586	Composite	COMP	COMP	COMP06	EUT	European taurine	Bos taurus/Bos indicus hybrid	Modern
SRR1348587	Composite	COMP	COMP	COMP07	EUT	European taurine	Bos taurus/Bos indicus hybrid	Modern
SRR1348588	Red_Angus	REDA	REDA	REDA03	EUT	European taurine	Bos taurus	Modern
SRR1348589	Hereford	HERE	HERE	HERE008	EUT	European taurine	Bos taurus	Modern
SRR1348590	Hereford	HERE	HERE	HERE009	EUT	European taurine	Bos taurus	Modern
SRR1348592	Holstein	HOLS	HOLS	HOLS012	EUT	European taurine	Bos taurus	Modern
SRR1355236	Gelbvieh	GELB	GELB	GELB007	EUT	European taurine	Bos taurus	Modern
SRR1355238	Maine_Anjou	MAIN	MAIN	MAIN01	EUT	European taurine	Bos taurus	Modern
SRR1355241	Gelbvieh	GELB	GELB	GELB008	EUT	European taurine	Bos taurus	Modern
SRR1355242	Gelbvieh	GELB	GELB	GELB009	EUT	European taurine	Bos taurus	Modern
SRR1355244	Angus	ANGU	ANGU	ANGU007	EUT	European taurine	Bos taurus	Modern
SRR1355245	Maine_Anjou	MAIN	MAIN	MAIN02	EUT	European taurine	Bos taurus	Modern
SRR1355246	Gelbvieh	GELB	GELB	GELB010	EUT	European taurine	Bos taurus	Modern
SRR1355248	Gelbvieh	GELB	GELB	GELB114	EUT	European taurine	Bos taurus	Modern
SRR1355249	Gelbvieh	GELB	GELB	GELB011	EUT	European taurine	Bos taurus	Modern
SRR1355250	Gelbvieh	GELB	GELB	GELB012	EUT	European taurine	Bos taurus	Modern
SRR1355252	Gelbvieh	GELB	GELB	GELB013	EUT	European taurine	Bos taurus	Modern
SRR1355253	Charolais	CHAR	CHAR	CHAR010	EUT	European taurine	Bos taurus	Modern
SRR1355254	Charolais	CHAR	CHAR	CHAR011	EUT	European taurine	Bos taurus	Modern
SRR1355255	Angus	ANGU	ANGU	ANGU008	EUT	European taurine	Bos taurus	Modern
SRR1355256	Composite	COMP	COMP	COMP08	EUT	European taurine	Bos taurus/Bos indicus hybrid	Modern
SRR1355257	Angus	ANGU	ANGU	ANGU009	EUT	European taurine	Bos taurus	Modern
SRR1355258	Charolais	CHAR	CHAR	CHAR012	EUT	European taurine	Bos taurus	Modern
SRR1355259	Maine_Anjou	MAIN	MAIN	MAIN03	EUT	European taurine	Bos taurus	Modern
SRR1355261	Hereford	HERE	HERE	HERE010	EUT	European taurine	Bos taurus	Modern
SRR13626465	Bagaria	BAGA	BAGA	BAGA01	AFI	African Indicine	Bos taurus/Bos indicus hybrid	Modern
SRR13626466	Bagaria	BAGA	BAGA	BAGA02	AFI	African Indicine	Bos taurus/Bos indicus hybrid	Modern
SRR13626467	Bagaria	BAGA	BAGA	BAGA03	AFI	African Indicine	Bos taurus/Bos indicus hybrid	Modern
SRR13626468	Bagaria	BAGA	BAGA	BAGA04	AFI	African Indicine	Bos taurus/Bos indicus hybrid	Modern
SRR13626469	Bagaria	BAGA	BAGA	BAGA05	AFI	African Indicine	Bos taurus/Bos indicus hybrid	Modern
SRR13626470	Afar	AFAR	AFAR	AFAR11	AFI	African Indicine	Bos taurus/Bos indicus hybrid	Modern
SRR13626471	Semien	SEMI	SEMI	SEMI01	AFI	African Indicine	Bos indicus	Modern
SRR13626472	Semien	SEMI	SEMI	SEMI02	AFI	African Indicine	Bos indicus	Modern
SRR13626473	Semien	SEMI	SEMI	SEMI03	AFI	African Indicine	Bos indicus	Modern
SRR13626474	Semien	SEMI	SEMI	SEMI04	AFI	African Indicine	Bos indicus	Modern
SRR13626475	Semien	SEMI	SEMI	SEMI05	AFI	African Indicine	Bos indicus	Modern
SRR13626476	Afar	AFAR	AFAR	AFAR12	AFI	African Indicine	Bos taurus/Bos indicus hybrid	Modern
SRR13626477	Semien	SEMI	SEMI	SEMI06	AFI	African Indicine	Bos indicus	Modern
SRR13626478	Semien	SEMI	SEMI	SEMI07	AFI	African Indicine	Bos indicus	Modern
SRR13626479	Semien	SEMI	SEMI	SEMI08	AFI	African Indicine	Bos indicus	Modern
SRR13626480	Semien	SEMI	SEMI	SEMI09	AFI	African Indicine	Bos indicus	Modern
SRR13626481	Semien	SEMI	SEMI	SEMI10	AFI	African Indicine	Bos indicus	Modern
SRR13626482	Bale	BALE	BALE	BALE01	AFI	African Indicine	Bos indicus	Modern
SRR13626483	Bale	BALE	BALE	BALE02	AFI	African Indicine	Bos indicus	Modern
SRR13626484	Bale	BALE	BALE	BALE03	AFI	African Indicine	Bos indicus	Modern
SRR13626485	Bale	BALE	BALE	BALE04	AFI	African Indicine	Bos indicus	Modern
SRR13626486	Bale	BALE	BALE	BALE05	AFI	African Indicine	Bos indicus	Modern
SRR13626487	Afar	AFAR	AFAR	AFAR13	AFI	African Indicine	Bos taurus/Bos indicus hybrid	Modern
SRR13626488	Bale	BALE	BALE	BALE06	AFI	African Indicine	Bos indicus	Modern
SRR13626489	Bale	BALE	BALE	BALE07	AFI	African Indicine	Bos indicus	Modern
SRR13626490	Bale	BALE	BALE	BALE08	AFI	African Indicine	Bos indicus	Modern
SRR13626491	Bale	BALE	BALE	BALE09	AFI	African Indicine	Bos indicus	Modern
SRR13626492	Bale	BALE	BALE	BALE10	AFI	African Indicine	Bos indicus	Modern
SRR13626493	Bagaria	BAGA	BAGA	BAGA06	AFI	African Indicine	Bos taurus/Bos indicus hybrid	Modern
SRR13626494	Bagaria	BAGA	BAGA	BAGA07	AFI	African Indicine	Bos taurus/Bos indicus hybrid	Modern
SRR13626495	Bagaria	BAGA	BAGA	BAGA08	AFI	African Indicine	Bos taurus/Bos indicus hybrid	Modern
SRR13626496	Bagaria	BAGA	BAGA	BAGA09	AFI	African Indicine	Bos taurus/Bos indicus hybrid	Modern
SRR13626497	Bagaria	BAGA	BAGA	BAGA10	AFI	African Indicine	Bos taurus/Bos indicus hybrid	Modern
SRR13626498	Afar	AFAR	AFAR	AFAR14	AFI	African Indicine	Bos taurus/Bos indicus hybrid	Modern
SRR13626499	Afar	AFAR	AFAR	AFAR15	AFI	African Indicine	Bos taurus/Bos indicus hybrid	Modern
SRR1365096	Composite	COMP	COMP	COMP09	EUT	European taurine	Bos taurus/Bos indicus hybrid	Modern
SRR1365097	Composite	COMP	COMP	COMP10	EUT	European taurine	Bos taurus/Bos indicus hybrid	Modern
SRR1365098	Composite	COMP	COMP	COMP11	EUT	European taurine	Bos taurus/Bos indicus hybrid	Modern
SRR1365099	Composite	COMP	COMP	COMP12	EUT	European taurine	Bos taurus/Bos indicus hybrid	Modern
SRR1365100	Composite	COMP	COMP	COMP13	EUT	European taurine	Bos taurus/Bos indicus hybrid	Modern
SRR1365101	Holstein	HOLS	HOLS	HOLS228	EUT	European taurine	Bos taurus	Modern
SRR1365104	Holstein	HOLS	HOLS	HOLS117	EUT	European taurine	Bos taurus	Modern
SRR1365105	Hereford	HERE	HERE	HERE011	EUT	European taurine	Bos taurus	Modern
SRR1365106	Hereford	HERE	HERE	HERE165	EUT	European taurine	Bos taurus	Modern
SRR1365107	Hereford	HERE	HERE	HERE012	EUT	European taurine	Bos taurus	Modern
SRR1365108	Maine_Anjou	MAIN	MAIN	MAIN04	EUT	European taurine	Bos taurus	Modern
SRR1365109	Hereford	HERE	HERE	HERE166	EUT	European taurine	Bos taurus	Modern
SRR1365110	Hereford	HERE	HERE	HERE013	EUT	European taurine	Bos taurus	Modern
SRR1365111	Hereford	HERE	HERE	HERE014	EUT	European taurine	Bos taurus	Modern
SRR1365114	Holstein	HOLS	HOLS	HOLS017	EUT	European taurine	Bos taurus	Modern
SRR1365115	Holstein	HOLS	HOLS	HOLS018	EUT	European taurine	Bos taurus	Modern
SRR1365116	Holstein	HOLS	HOLS	HOLS019	EUT	European taurine	Bos taurus	Modern
SRR1365117	Holstein	HOLS	HOLS	HOLS020	EUT	European taurine	Bos taurus	Modern
SRR1365118	Holstein	HOLS	HOLS	HOLS021	EUT	European taurine	Bos taurus	Modern
SRR1365119	Holstein	HOLS	HOLS	HOLS022	EUT	European taurine	Bos taurus	Modern
SRR1365120	Holstein	HOLS	HOLS	HOLS118	EUT	European taurine	Bos taurus	Modern
SRR1365121	Holstein	HOLS	HOLS	HOLS119	EUT	European taurine	Bos taurus	Modern
SRR1365122	Charolais	CHAR	CHAR	CHAR013	EUT	European taurine	Bos taurus	Modern
SRR1365123	Holstein	HOLS	HOLS	HOLS023	EUT	European taurine	Bos taurus	Modern
SRR1365124	Hereford	HERE	HERE	HERE015	EUT	European taurine	Bos taurus	Modern
SRR1365125	Maine_Anjou	MAIN	MAIN	MAIN05	EUT	European taurine	Bos taurus	Modern
SRR1365126	Hereford	HERE	HERE	HERE016	EUT	European taurine	Bos taurus	Modern
SRR1365127	Maine_Anjou	MAIN	MAIN	MAIN06	EUT	European taurine	Bos taurus	Modern
SRR1365128	Hereford	HERE	HERE	HERE163	EUT	European taurine	Bos taurus	Modern
SRR1365129	Angus	ANGU	ANGU	ANGU010	EUT	European taurine	Bos taurus	Modern
SRR1365130	Maine_Anjou	MAIN	MAIN	MAIN07	EUT	European taurine	Bos taurus	Modern
SRR1365131	Hereford	HERE	HERE	HERE017	EUT	European taurine	Bos taurus	Modern
SRR1365132	Angus	ANGU	ANGU	ANGU011	EUT	European taurine	Bos taurus	Modern
SRR1365133	Hereford	HERE	HERE	HERE018	EUT	European taurine	Bos taurus	Modern
SRR1365134	Limousin	LIMO	LIMO	LIMO001	EUT	European taurine	Bos taurus	Modern
SRR1365135	Gelbvieh	GELB	GELB	GELB014	EUT	European taurine	Bos taurus	Modern
SRR1365137	Hereford	HERE	HERE	HERE019	EUT	European taurine	Bos taurus	Modern
SRR1365138	Gelbvieh	GELB	GELB	GELB015	EUT	European taurine	Bos taurus	Modern
SRR1365139	Hereford	HERE	HERE	HERE020	EUT	European taurine	Bos taurus	Modern
SRR1365140	Hereford	HERE	HERE	HERE021	EUT	European taurine	Bos taurus	Modern
SRR1365141	Composite	COMP	COMP	COMP14	EUT	European taurine	Bos taurus/Bos indicus hybrid	Modern
SRR1365142	Hereford	HERE	HERE	HERE022	EUT	European taurine	Bos taurus	Modern
SRR1365143	Composite	COMP	COMP	COMP15	EUT	European taurine	Bos taurus/Bos indicus hybrid	Modern
SRR1365145	Charolais	CHAR	CHAR	CHAR178	EUT	European taurine	Bos taurus	Modern
SRR1365146	Composite	COMP	COMP	COMP16	EUT	European taurine	Bos taurus/Bos indicus hybrid	Modern
SRR1365147	Holstein	HOLS	HOLS	HOLS024	EUT	European taurine	Bos taurus	Modern
SRR1365148	Composite	COMP	COMP	COMP17	EUT	European taurine	Bos taurus/Bos indicus hybrid	Modern
SRR1425122	Angus	ANGU	ANGU	ANGU012	EUT	European taurine	Bos taurus	Modern
SRR1425123	Gelbvieh	GELB	GELB	GELB016	EUT	European taurine	Bos taurus	Modern
SRR1425124	Angus	ANGU	ANGU	ANGU013	EUT	European taurine	Bos taurus	Modern
SRR1425125	Holstein	HOLS	HOLS	HOLS013	EUT	European taurine	Bos taurus	Modern
SRR1425126	Holstein	HOLS	HOLS	HOLS014	EUT	European taurine	Bos taurus	Modern
SRR1425127	Holstein	HOLS	HOLS	HOLS015	EUT	European taurine	Bos taurus	Modern
SRR1425128	Holstein	HOLS	HOLS	HOLS025	EUT	European taurine	Bos taurus	Modern
SRR1425129	Holstein	HOLS	HOLS	HOLS026	EUT	European taurine	Bos taurus	Modern
SRR1425130	Holstein	HOLS	HOLS	HOLS027	EUT	European taurine	Bos taurus	Modern
SRR1425131	Holstein	HOLS	HOLS	HOLS225	EUT	European taurine	Bos taurus	Modern
SRR1425132	Holstein	HOLS	HOLS	HOLS028	EUT	European taurine	Bos taurus	Modern
SRR1425133	Holstein	HOLS	HOLS	HOLS029	EUT	European taurine	Bos taurus	Modern
SRR1425134	Holstein	HOLS	HOLS	HOLS030	EUT	European taurine	Bos taurus	Modern
SRR1425136	Holstein	HOLS	HOLS	HOLS031	EUT	European taurine	Bos taurus	Modern
SRR1425137	Holstein	HOLS	HOLS	HOLS032	EUT	European taurine	Bos taurus	Modern
SRR1425139	Holstein	HOLS	HOLS	HOLS226	EUT	European taurine	Bos taurus	Modern
SRR1425140	Holstein	HOLS	HOLS	HOLS033	EUT	European taurine	Bos taurus	Modern
SRR1425141	Angus	ANGU	ANGU	ANGU179	EUT	European taurine	Bos taurus	Modern
SRR1425142	Composite	COMP	COMP	COMP19	EUT	European taurine	Bos taurus/Bos indicus hybrid	Modern
SRR1425143	Red_Angus	REDA	REDA	REDA49	EUT	European taurine	Bos taurus	Modern
SRR1425144	Holstein	HOLS	HOLS	HOLS034	EUT	European taurine	Bos taurus	Modern
SRR1425145	Red_Angus	REDA	REDA	REDA04	EUT	European taurine	Bos taurus	Modern
SRR1425146	Red_Angus	REDA	REDA	REDA05	EUT	European taurine	Bos taurus	Modern
SRR1425147	Angus	ANGU	ANGU	ANGU014	EUT	European taurine	Bos taurus	Modern
SRR1425148	Angus	ANGU	ANGU	ANGU015	EUT	European taurine	Bos taurus	Modern
SRR1425149	Angus	ANGU	ANGU	ANGU016	EUT	European taurine	Bos taurus	Modern
SRR1425150	Angus	ANGU	ANGU	ANGU017	EUT	European taurine	Bos taurus	Modern
SRR1425151	Composite	COMP	COMP	COMP18	EUT	European taurine	Bos taurus/Bos indicus hybrid	Modern
SRR1425152	Red_Angus	REDA	REDA	REDA06	EUT	European taurine	Bos taurus	Modern
SRR1425154	Gelbvieh	GELB	GELB	GELB017	EUT	European taurine	Bos taurus	Modern
SRR1425155	Holstein	HOLS	HOLS	HOLS227	EUT	European taurine	Bos taurus	Modern
SRR1425156	Holstein	HOLS	HOLS	HOLS035	EUT	European taurine	Bos taurus	Modern
SRR1425157	Holstein	HOLS	HOLS	HOLS036	EUT	European taurine	Bos taurus	Modern
SRR1425158	Holstein	HOLS	HOLS	HOLS037	EUT	European taurine	Bos taurus	Modern
SRR1425159	Holstein	HOLS	HOLS	HOLS120	EUT	European taurine	Bos taurus	Modern
SRR1425160	Holstein	HOLS	HOLS	HOLS038	EUT	European taurine	Bos taurus	Modern
SRR1425161	Holstein	HOLS	HOLS	HOLS121	EUT	European taurine	Bos taurus	Modern
SRR1425162	Holstein	HOLS	HOLS	HOLS122	EUT	European taurine	Bos taurus	Modern
SRR1425163	Holstein	HOLS	HOLS	HOLS123	EUT	European taurine	Bos taurus	Modern
SRR1425164	Holstein	HOLS	HOLS	HOLS124	EUT	European taurine	Bos taurus	Modern
SRR1425165	Holstein	HOLS	HOLS	HOLS125	EUT	European taurine	Bos taurus	Modern
SRR1425166	Holstein	HOLS	HOLS	HOLS126	EUT	European taurine	Bos taurus	Modern
SRR1462188	Hereford	HERE	HERE	HERE023	EUT	European taurine	Bos taurus	Modern
SRR1462189	Hereford	HERE	HERE	HERE024	EUT	European taurine	Bos taurus	Modern
SRR1525581	Red_Angus	REDA	REDA	REDA07	EUT	European taurine	Bos taurus	Modern
SRR1525582	Angus	ANGU	ANGU	ANGU018	EUT	European taurine	Bos taurus	Modern
SRR1525584	Crossbreed	CROS	CROS	CROS01	EUT	European taurine	Bos taurus	Modern
SRR1525596	Piedmontese	PIED	PIED	PIED01	EUT	European taurine	Bos taurus	Modern
SRR1525597	Crossbreed	CROS	CROS	CROS20	EUT	European taurine	Bos taurus	Modern
SRR1525598	Crossbreed	CROS	CROS	CROS02	EUT	European taurine	Bos taurus	Modern
SRR1525599	Piedmontese	PIED	PIED	PIED02	EUT	European taurine	Bos taurus	Modern
SRR1525600	Red_Angus	REDA	REDA	REDA08	EUT	European taurine	Bos taurus	Modern
SRR1525601	Crossbreed	CROS	CROS	CROS03	EUT	European taurine	Bos taurus	Modern
SRR1525602	Charolais	CHAR	CHAR	CHAR014	EUT	European taurine	Bos taurus	Modern
SRR1525603	Piedmontese	PIED	PIED	PIED03	EUT	European taurine	Bos taurus	Modern
SRR1525604	Piedmontese	PIED	PIED	PIED04	EUT	European taurine	Bos taurus	Modern
SRR1525605	Crossbreed	CROS	CROS	CROS04	EUT	European taurine	Bos taurus/Bos indicus hybrid	Modern
SRR1525606	Piedmontese	PIED	PIED	PIED05	EUT	European taurine	Bos taurus	Modern
SRR1525607	Charolais	CHAR	CHAR	CHAR015	EUT	European taurine	Bos taurus	Modern
SRR1525608	Salers	SALE	SALE	SALE10	EUT	European taurine	Bos taurus	Modern
SRR1525609	Crossbreed	CROS	CROS	CROS05	EUT	European taurine	Bos taurus/Bos indicus hybrid	Modern
SRR1525610	Crossbreed	CROS	CROS	CROS21	EUT	European taurine	Bos taurus/Bos indicus hybrid	Modern
SRR1525611	Crossbreed	CROS	CROS	CROS06	EUT	European taurine	Bos taurus/Bos indicus hybrid	Modern
SRR1525612	Charolais	CHAR	CHAR	CHAR016	EUT	European taurine	Bos taurus	Modern
SRR1525617	Simmental	SIMM	SIMM	SIMM004	EUT	European taurine	Bos taurus	Modern
SRR1525618	Simmental	SIMM	SIMM	SIMM005	EUT	European taurine	Bos taurus	Modern
SRR1525619	Simmental	SIMM	SIMM	SIMM006	EUT	European taurine	Bos taurus	Modern
SRR1525620	Simmental	SIMM	SIMM	SIMM141	EUT	European taurine	Bos taurus	Modern
SRR1525621	Simmental	SIMM	SIMM	SIMM007	EUT	European taurine	Bos taurus	Modern
SRR1525622	Simmental	SIMM	SIMM	SIMM008	EUT	European taurine	Bos taurus	Modern
SRR1525623	Simmental	SIMM	SIMM	SIMM009	EUT	European taurine	Bos taurus	Modern
SRR1525624	Simmental	SIMM	SIMM	SIMM010	EUT	European taurine	Bos taurus	Modern
SRR1525625	Simmental	SIMM	SIMM	SIMM011	EUT	European taurine	Bos taurus	Modern
SRR1525626	Simmental	SIMM	SIMM	SIMM012	EUT	European taurine	Bos taurus	Modern
SRR1525627	Simmental	SIMM	SIMM	SIMM013	EUT	European taurine	Bos taurus	Modern
SRR1525691	Angus	ANGU	ANGU	ANGU019	EUT	European taurine	Bos taurus	Modern
SRR1525693	Angus	ANGU	ANGU	ANGU020	EUT	European taurine	Bos taurus	Modern
SRR1525700	Simmental	SIMM	SIMM	SIMM014	EUT	European taurine	Bos taurus	Modern
SRR1525701	Simmental	SIMM	SIMM	SIMM015	EUT	European taurine	Bos taurus	Modern
SRR1525702	Simmental	SIMM	SIMM	SIMM016	EUT	European taurine	Bos taurus	Modern
SRR1525703	Simmental	SIMM	SIMM	SIMM017	EUT	European taurine	Bos taurus	Modern
SRR1525704	Simmental	SIMM	SIMM	SIMM018	EUT	European taurine	Bos taurus	Modern
SRR1525705	Simmental	SIMM	SIMM	SIMM019	EUT	European taurine	Bos taurus	Modern
SRR1525706	Simmental	SIMM	SIMM	SIMM020	EUT	European taurine	Bos taurus	Modern
SRR1525707	Simmental	SIMM	SIMM	SIMM021	EUT	European taurine	Bos taurus	Modern
SRR1525708	Simmental	SIMM	SIMM	SIMM022	EUT	European taurine	Bos taurus	Modern
SRR1525709	Simmental	SIMM	SIMM	SIMM023	EUT	European taurine	Bos taurus	Modern
SRR1525710	Simmental	SIMM	SIMM	SIMM024	EUT	European taurine	Bos taurus	Modern
SRR1525711	Simmental	SIMM	SIMM	SIMM025	EUT	European taurine	Bos taurus	Modern
SRR1525712	Simmental	SIMM	SIMM	SIMM026	EUT	European taurine	Bos taurus	Modern
SRR1525714	Simmental	SIMM	SIMM	SIMM027	EUT	European taurine	Bos taurus	Modern
SRR1525715	Simmental	SIMM	SIMM	SIMM028	EUT	European taurine	Bos taurus	Modern
SRR1525716	Simmental	SIMM	SIMM	SIMM029	EUT	European taurine	Bos taurus	Modern
SRR1525717	Simmental	SIMM	SIMM	SIMM030	EUT	European taurine	Bos taurus	Modern
SRR1525718	Simmental	SIMM	SIMM	SIMM031	EUT	European taurine	Bos taurus	Modern
SRR1525719	Simmental	SIMM	SIMM	SIMM032	EUT	European taurine	Bos taurus	Modern
SRR1528437	Crossbreed	CROS	CROS	CROS07	EUT	European taurine	Bos taurus	Modern
SRR17331394	Weizhou	WEIZ	WEIZ	WEIZ01	ASI	Indicine	Bos indicus	Modern
SRR17331395	Weizhou	WEIZ	WEIZ	WEIZ02	ASI	Indicine	Bos indicus	Modern
SRR17331396	Weizhou	WEIZ	WEIZ	WEIZ03	ASI	Indicine	Bos indicus	Modern
SRR17331397	Weizhou	WEIZ	WEIZ	WEIZ04	ASI	Indicine	Bos indicus	Modern
SRR17331398	Weizhou	WEIZ	WEIZ	WEIZ05	ASI	Indicine	Bos indicus	Modern
SRR17331399	Weizhou	WEIZ	WEIZ	WEIZ06	ASI	Indicine	Bos indicus	Modern
SRR17331400	Weizhou	WEIZ	WEIZ	WEIZ07	ASI	Indicine	Bos indicus	Modern
SRR17331401	Weizhou	WEIZ	WEIZ	WEIZ08	ASI	Indicine	Bos indicus	Modern
SRR17331402	Weizhou	WEIZ	WEIZ	WEIZ09	ASI	Indicine	Bos indicus	Modern
SRR17331403	Weizhou	WEIZ	WEIZ	WEIZ10	ASI	Indicine	Bos indicus	Modern
SRR17331404	Weizhou	WEIZ	WEIZ	WEIZ11	ASI	Indicine	Bos indicus	Modern
SRR17331405	Weizhou	WEIZ	WEIZ	WEIZ12	ASI	Indicine	Bos indicus	Modern
SRR17331406	Weizhou	WEIZ	WEIZ	WEIZ13	ASI	Indicine	Bos indicus	Modern
SRR17331407	Weizhou	WEIZ	WEIZ	WEIZ14	ASI	Indicine	Bos indicus	Modern
SRR17331408	Weizhou	WEIZ	WEIZ	WEIZ15	ASI	Indicine	Bos indicus	Modern
SRR17331409	Weizhou	WEIZ	WEIZ	WEIZ16	ASI	Indicine	Bos indicus	Modern
SRR17331410	Weizhou	WEIZ	WEIZ	WEIZ17	ASI	Indicine	Bos indicus	Modern
SRR17333524	Longlin	LONG	LONG	LONG01	ASI	Indicine	Bos indicus	Modern
SRR17333525	Longlin	LONG	LONG	LONG02	ASI	Indicine	Bos indicus	Modern
SRR17333526	Longlin	LONG	LONG	LONG03	ASI	Indicine	Bos indicus	Modern
SRR17333527	Longlin	LONG	LONG	LONG04	ASI	Indicine	Bos indicus	Modern
SRR17333528	Longlin	LONG	LONG	LONG05	ASI	Indicine	Bos indicus	Modern
SRR17333529	Longlin	LONG	LONG	LONG06	ASI	Indicine	Bos indicus	Modern
SRR17333530	Longlin	LONG	LONG	LONG07	ASI	Indicine	Bos indicus	Modern
SRR17333531	Longlin	LONG	LONG	LONG08	ASI	Indicine	Bos indicus	Modern
SRR17333532	Longlin	LONG	LONG	LONG09	ASI	Indicine	Bos indicus	Modern
SRR17333533	Longlin	LONG	LONG	LONG10	ASI	Indicine	Bos indicus	Modern
SRR17333534	Longlin	LONG	LONG	LONG11	ASI	Indicine	Bos indicus	Modern
SRR17333535	Longlin	LONG	LONG	LONG12	ASI	Indicine	Bos indicus	Modern
SRR17333808	Chaidamu	CHAI	CHAI	CHAI01	EUT	European taurine	Bos taurus	Modern
SRR17333809	Chaidamu	CHAI	CHAI	CHAI02	EUT	European taurine	Bos taurus	Modern
SRR17333810	Chaidamu	CHAI	CHAI	CHAI03	EUT	European taurine	Bos taurus	Modern
SRR17333811	Chaidamu	CHAI	CHAI	CHAI04	EUT	European taurine	Bos taurus	Modern
SRR17333812	Chaidamu	CHAI	CHAI	CHAI05	EUT	European taurine	Bos taurus	Modern
SRR17333813	Chaidamu	CHAI	CHAI	CHAI06	EUT	European taurine	Bos taurus	Modern
SRR17344640	Kailali	KAIL	KAIL	KAIL01	ASI	Indicine	Bos indicus	Modern
SRR17344641	Siraha	SIRA	SIRA	SIRA01	ASI	Indicine	Bos indicus	Modern
SRR17344642	Siraha	SIRA	SIRA	SIRA02	ASI	Indicine	Bos indicus	Modern
SRR17344643	Siraha	SIRA	SIRA	SIRA03	ASI	Indicine	Bos indicus	Modern
SRR17344644	Siraha	SIRA	SIRA	SIRA04	ASI	Indicine	Bos indicus	Modern
SRR17344645	Siraha	SIRA	SIRA	SIRA05	ASI	Indicine	Bos indicus	Modern
SRR17344646	Siraha	SIRA	SIRA	SIRA06	ASI	Indicine	Bos indicus	Modern
SRR17344647	Siraha	SIRA	SIRA	SIRA07	ASI	Indicine	Bos indicus	Modern
SRR17344648	Kapilvastu	KAPI	KAPI	KAPI01	ASI	Indicine	Bos indicus	Modern
SRR17344649	Kapilvastu	KAPI	KAPI	KAPI02	ASI	Indicine	Bos indicus	Modern
SRR17344650	Kapilvastu	KAPI	KAPI	KAPI03	ASI	Indicine	Bos indicus	Modern
SRR17344651	Saptari	SAPT	SAPT	SAPT01	ASI	Indicine	Bos indicus	Modern
SRR17344652	Kailali	KAIL	KAIL	KAIL02	ASI	Indicine	Bos indicus	Modern
SRR17344653	Saptari	SAPT	SAPT	SAPT02	ASI	Indicine	Bos indicus	Modern
SRR17344654	Saptari	SAPT	SAPT	SAPT03	ASI	Indicine	Bos indicus	Modern
SRR17381668	Burma	BURM	BURM	BURM01	ASI	Indicine	Bos indicus	Modern
SRR17381669	Burma	BURM	BURM	BURM02	ASI	Indicine	Bos indicus	Modern
SRR17381671	Burma	BURM	BURM	BURM03	ASI	Indicine	Bos indicus	Modern
SRR17381672	Burma	BURM	BURM	BURM04	ASI	Indicine	Bos indicus	Modern
SRR17381673	Shigatse	SHIG	SHIG	SHIG01	ASI	Indicine	Bos indicus	Modern
SRR17381674	Shigatse	SHIG	SHIG	SHIG02	ASI	Indicine	Bos indicus	Modern
SRR17381675	Shigatse	SHIG	SHIG	SHIG03	ASI	Indicine	Bos indicus	Modern
SRR17381676	Shigatse	SHIG	SHIG	SHIG04	ASI	Indicine	Bos indicus	Modern
SRR17381677	Shigatse	SHIG	SHIG	SHIG05	ASI	Indicine	Bos indicus	Modern
SRR17381678	Shigatse	SHIG	SHIG	SHIG06	ASI	Indicine	Bos indicus	Modern
SRR17381679	Shigatse	SHIG	SHIG	SHIG07	ASI	Indicine	Bos indicus	Modern
SRR17458592	Jiangcheng	JICG	JICG	JICG01	ASI	Indicine	Bos indicus	Modern
SRR17458593	Jiangcheng	JICG	JICG	JICG02	ASI	Indicine	Bos indicus	Modern
SRR17458594	Dehong	DEHO	DEHO	DEHO01	ASI	Indicine	Bos indicus	Modern
SRR17458595	Dehong	DEHO	DEHO	DEHO02	ASI	Indicine	Bos indicus	Modern
SRR17458596	Dehong	DEHO	DEHO	DEHO03	ASI	Indicine	Bos indicus	Modern
SRR17458600	Mengsong	MENG	MENG	MENG01	ASI	Indicine	Bos indicus	Modern
SRR17548928	NDama_Nigeria_Contemporary	NDAN	NDAN	NDAN01	AFT	African taurine	Bos taurus	Modern
SRR17548929	Muturu_Nigeria_Contemporary	MUTC	MUTC	MUTC01	AFT	African taurine	Bos taurus	Modern
SRR17548930	Muturu_Nigeria_Contemporary	MUTC	MUTC	MUTC02	AFT	African taurine	Bos taurus	Modern
SRR17548931	Muturu_Nigeria_Contemporary	MUTC	MUTC	MUTC03	AFT	African taurine	Bos taurus	Modern
SRR1931156	Turano_mongolian	TURA	TURA	TURA01	EUT	European taurine	Bos taurus	Modern
SRR1972977	Hereford	HERE	HERE	HERE025	EUT	European taurine	Bos taurus	Modern
SRR19879555	Butana	BUTA	BUTA	BUTA44	AFI	African Indicine	Bos indicus	Modern
SRR19879556	Butana	BUTA	BUTA	BUTA45	AFI	African Indicine	Bos indicus	Modern
SRR19879557	Butana	BUTA	BUTA	BUTA46	AFI	African Indicine	Bos indicus	Modern
SRR19879558	Butana	BUTA	BUTA	BUTA47	AFI	African Indicine	Bos indicus	Modern
SRR19879559	Butana	BUTA	BUTA	BUTA48	AFI	African Indicine	Bos indicus	Modern
SRR19879560	Butana	BUTA	BUTA	BUTA49	AFI	African Indicine	Bos indicus	Modern
SRR19879561	Butana	BUTA	BUTA	BUTA50	AFI	African Indicine	Bos indicus	Modern
SRR19879562	Baggara	BAGG	BAGG	BAGG01	AFI	African Indicine	Bos indicus	Modern
SRR19879563	Baggara	BAGG	BAGG	BAGG02	AFI	African Indicine	Bos indicus	Modern
SRR19879564	Baggara	BAGG	BAGG	BAGG03	AFI	African Indicine	Bos indicus	Modern
SRR19879565	Baggara	BAGG	BAGG	BAGG04	AFI	African Indicine	Bos indicus	Modern
SRR19879566	Baggara	BAGG	BAGG	BAGG05	AFI	African Indicine	Bos indicus	Modern
SRR19879567	Baggara	BAGG	BAGG	BAGG06	AFI	African Indicine	Bos indicus	Modern
SRR19879568	Baggara	BAGG	BAGG	BAGG07	AFI	African Indicine	Bos indicus	Modern
SRR19879569	Baggara	BAGG	BAGG	BAGG08	AFI	African Indicine	Bos indicus	Modern
SRR19879570	Baggara	BAGG	BAGG	BAGG09	AFI	African Indicine	Bos indicus	Modern
SRR19879571	Baggara	BAGG	BAGG	BAGG10	AFI	African Indicine	Bos indicus	Modern
SRR19879572	Butana	BUTA	BUTA	BUTA51	AFI	African Indicine	Bos indicus	Modern
SRR19879573	Kenana	KENA	KENA	KENA40	AFI	African Indicine	Bos indicus	Modern
SRR19879574	Kenana	KENA	KENA	KENA41	AFI	African Indicine	Bos indicus	Modern
SRR19879575	Kenana	KENA	KENA	KENA42	AFI	African Indicine	Bos indicus	Modern
SRR19879576	Kenana	KENA	KENA	KENA43	AFI	African Indicine	Bos indicus	Modern
SRR19879577	Kenana	KENA	KENA	KENA44	AFI	African Indicine	Bos indicus	Modern
SRR19879578	Kenana	KENA	KENA	KENA45	AFI	African Indicine	Bos indicus	Modern
SRR19879579	Kenana	KENA	KENA	KENA46	AFI	African Indicine	Bos indicus	Modern
SRR19879580	Kenana	KENA	KENA	KENA47	AFI	African Indicine	Bos indicus	Modern
SRR19879581	Kenana	KENA	KENA	KENA48	AFI	African Indicine	Bos indicus	Modern
SRR19879582	Butana	BUTA	BUTA	BUTA43	AFI	African Indicine	Bos indicus	Modern
SRR19879583	Butana	BUTA	BUTA	BUTA52	AFI	African Indicine	Bos indicus	Modern
SRR19879584	Butana	BUTA	BUTA	BUTA53	AFI	African Indicine	Bos indicus	Modern
SRR19880023	Ghana_Shorthorn	GHAN	GHAN	GHAN01	AFT	African taurine	Bos taurus	Modern
SRR19880023	Muturu_Nigeria_Forest	MUTF	MUTF	MUTF14	AFT	African taurine	Bos taurus	Modern
SRR19880024	Ghana_Shorthorn	GHAN	GHAN	GHAN02	AFT	African taurine	Bos taurus	Modern
SRR19880024	Muturu_Nigeria_Forest	MUTF	MUTF	MUTF13	AFT	African taurine	Bos taurus	Modern
SRR19880025	Ghana_Shorthorn	GHAN	GHAN	GHAN03	AFT	African taurine	Bos taurus	Modern
SRR19880025	Muturu_Nigeria_Forest	MUTF	MUTF	MUTF12	AFT	African taurine	Bos taurus	Modern
SRR19880026	Ghana_Shorthorn	GHAN	GHAN	GHAN04	AFT	African taurine	Bos taurus	Modern
SRR19880026	Muturu_Nigeria_Forest	MUTF	MUTF	MUTF11	AFT	African taurine	Bos taurus	Modern
SRR19880027	Ghana_Shorthorn	GHAN	GHAN	GHAN05	AFT	African taurine	Bos taurus	Modern
SRR19880027	Muturu_Nigeria_Forest	MUTF	MUTF	MUTF10	AFT	African taurine	Bos taurus	Modern
SRR19880028	Ghana_Shorthorn	GHAN	GHAN	GHAN06	AFT	African taurine	Bos taurus	Modern
SRR19880028	Muturu_Nigeria_Forest	MUTF	MUTF	MUTF09	AFT	African taurine	Bos taurus	Modern
SRR19880029	Ghana_Shorthorn	GHAN	GHAN	GHAN07	AFT	African taurine	Bos taurus	Modern
SRR19880029	Muturu_Nigeria_Forest	MUTF	MUTF	MUTF08	AFT	African taurine	Bos taurus	Modern
SRR19880030	Ghana_Shorthorn	GHAN	GHAN	GHAN08	AFT	African taurine	Bos taurus	Modern
SRR19880030	Muturu_Nigeria_Forest	MUTF	MUTF	MUTF07	AFT	African taurine	Bos taurus	Modern
SRR19880031	Ghana_Shorthorn	GHAN	GHAN	GHAN09	AFT	African taurine	Bos taurus	Modern
SRR19880031	Muturu_Nigeria_Forest	MUTF	MUTF	MUTF06	AFT	African taurine	Bos taurus	Modern
SRR19880032	Ghana_Shorthorn	GHAN	GHAN	GHAN10	AFT	African taurine	Bos taurus	Modern
SRR19880032	Muturu_Nigeria_Forest	MUTF	MUTF	MUTF05	AFT	African taurine	Bos taurus	Modern
SRR19880624	Ethiopian_Boran	ETHI	ETHI	ETHI21	AFI	African Indicine	Bos indicus	Modern
SRR19880625	Ethiopian_Boran	ETHI	ETHI	ETHI22	AFI	African Indicine	Bos indicus	Modern
SRR19880626	Ethiopian_Boran	ETHI	ETHI	ETHI23	AFI	African Indicine	Bos indicus	Modern
SRR19880627	Ethiopian_Boran	ETHI	ETHI	ETHI24	AFI	African Indicine	Bos indicus	Modern
SRR19880628	Ethiopian_Boran	ETHI	ETHI	ETHI25	AFI	African Indicine	Bos indicus	Modern
SRR19880629	Ethiopian_Boran	ETHI	ETHI	ETHI26	AFI	African Indicine	Bos indicus	Modern
SRR19880630	Ethiopian_Boran	ETHI	ETHI	ETHI27	AFI	African Indicine	Bos indicus	Modern
SRR19880631	Ethiopian_Boran	ETHI	ETHI	ETHI28	AFI	African Indicine	Bos indicus	Modern
SRR19880632	Ethiopian_Boran	ETHI	ETHI	ETHI11	AFI	African Indicine	Bos indicus	Modern
SRR19880633	Ethiopian_Boran	ETHI	ETHI	ETHI12	AFI	African Indicine	Bos indicus	Modern
SRR19880634	Ethiopian_Boran	ETHI	ETHI	ETHI13	AFI	African Indicine	Bos indicus	Modern
SRR19880635	Ethiopian_Boran	ETHI	ETHI	ETHI14	AFI	African Indicine	Bos indicus	Modern
SRR19880636	Ethiopian_Boran	ETHI	ETHI	ETHI15	AFI	African Indicine	Bos indicus	Modern
SRR19880637	Ethiopian_Boran	ETHI	ETHI	ETHI16	AFI	African Indicine	Bos indicus	Modern
SRR19880638	Ethiopian_Boran	ETHI	ETHI	ETHI17	AFI	African Indicine	Bos indicus	Modern
SRR19880639	Ethiopian_Boran	ETHI	ETHI	ETHI18	AFI	African Indicine	Bos indicus	Modern
SRR19880640	Ethiopian_Boran	ETHI	ETHI	ETHI19	AFI	African Indicine	Bos indicus	Modern
SRR19880641	Ethiopian_Boran	ETHI	ETHI	ETHI20	AFI	African Indicine	Bos indicus	Modern
SRR19880642	Ethiopian_Boran	ETHI	ETHI	ETHI29	AFI	African Indicine	Bos indicus	Modern
SRR19880643	Ethiopian_Boran	ETHI	ETHI	ETHI30	AFI	African Indicine	Bos indicus	Modern
SRR19880916	NDama_Senegal_Contemporary	NDSC	NDSC	NDSC10	AFT	African taurine	Bos taurus	Modern
SRR19880918	NDama_Senegal_Contemporary	NDSC	NDSC	NDSC11	AFT	African taurine	Bos taurus	Modern
SRR19880919	NDama_Senegal_Contemporary	NDSC	NDSC	NDSC12	AFT	African taurine	Bos taurus	Modern
SRR19880920	NDama_Senegal_Contemporary	NDSC	NDSC	NDSC13	AFT	African taurine	Bos taurus	Modern
SRR19880921	NDama_Senegal_Contemporary	NDSC	NDSC	NDSC14	AFT	African taurine	Bos taurus	Modern
SRR19880922	Djakkore_Senegal_Contemporary	DJAK	DJAK	DJAK02	AFT	African taurine	Bos taurus/Bos indicus hybrid	Modern
SRR19880923	Zebu_Maure	ZBMA	ZBMA	ZBMA01	AFS	African Sanga	Bos indicus	Modern
SRR19880924	Zebu_Maure	ZBMA	ZBMA	ZBMA02	AFS	African Sanga	Bos indicus	Modern
SRR19880925	Djakkore_Senegal_Contemporary	DJAK	DJAK	DJAK03	AFT	African taurine	Bos taurus/Bos indicus hybrid	Modern
SRR19880926	Zebu_Maure	ZBMA	ZBMA	ZBMA03	AFS	African Sanga	Bos indicus	Modern
SRR19880927	Zebu_Maure	ZBMA	ZBMA	ZBMA04	AFS	African Sanga	Bos indicus	Modern
SRR19880928	Zebu_Maure	ZBMA	ZBMA	ZBMA05	AFS	African Sanga	Bos indicus	Modern
SRR19880929	Zebu_Maure	ZBMA	ZBMA	ZBMA06	AFS	African Sanga	Bos indicus	Modern
SRR19880930	Zebu_Maure	ZBMA	ZBMA	ZBMA07	AFS	African Sanga	Bos indicus	Modern
SRR19880931	Zebu_Maure	ZBMA	ZBMA	ZBMA08	AFS	African Sanga	Bos indicus	Modern
SRR19880932	NDama_Senegal_Contemporary	NDSC	NDSC	NDSC06	AFT	African taurine	Bos taurus	Modern
SRR19880933	NDama_Senegal_Contemporary	NDSC	NDSC	NDSC07	AFT	African taurine	Bos taurus	Modern
SRR19880934	NDama_Senegal_Contemporary	NDSC	NDSC	NDSC08	AFT	African taurine	Bos taurus	Modern
SRR19880935	NDama_Senegal_Contemporary	NDSC	NDSC	NDSC09	AFT	African taurine	Bos taurus	Modern
SRR19880936	Djakkore_Senegal_Contemporary	DJAK	DJAK	DJAK04	AFT	African taurine	Bos taurus/Bos indicus hybrid	Modern
SRR19880937	Djakkore_Senegal_Contemporary	DJAK	DJAK	DJAK05	AFT	African taurine	Bos taurus/Bos indicus hybrid	Modern
SRR19960435	Gourounsi	GOUR	GOUR	GOUR09	AFT	African taurine	Bos taurus	Modern
SRR19960436	Baoule_BurkinaFaso_Contemporary	BBFC	BBFC	BBFC03	AFT	African taurine	Bos taurus	Modern
SRR19960437	Baoule_BurkinaFaso_Contemporary	BBFC	BBFC	BBFC04	AFT	African taurine	Bos taurus	Modern
SRR19960438	Baoule_BurkinaFaso_Contemporary	BBFC	BBFC	BBFC05	AFT	African taurine	Bos taurus	Modern
SRR19960439	Baoule_BurkinaFaso_Contemporary	BBFC	BBFC	BBFC06	AFT	African taurine	Bos taurus	Modern
SRR19960440	Baoule_BurkinaFaso_Contemporary	BBFC	BBFC	BBFC07	AFT	African taurine	Bos taurus	Modern
SRR19960441	Baoule_BurkinaFaso_Contemporary	BBFC	BBFC	BBFC08	AFT	African taurine	Bos taurus	Modern
SRR19960442	Baoule_BurkinaFaso_Contemporary	BBFC	BBFC	BBFC09	AFT	African taurine	Bos taurus	Modern
SRR19960443	Gourounsi	GOUR	GOUR	GOUR03	AFT	African taurine	Bos taurus	Modern
SRR19960444	Gourounsi	GOUR	GOUR	GOUR04	AFT	African taurine	Bos taurus	Modern
SRR19960445	Gourounsi	GOUR	GOUR	GOUR05	AFT	African taurine	Bos taurus	Modern
SRR19960446	Gourounsi	GOUR	GOUR	GOUR06	AFT	African taurine	Bos taurus	Modern
SRR19960447	Gourounsi	GOUR	GOUR	GOUR07	AFT	African taurine	Bos taurus	Modern
SRR19960448	Gourounsi	GOUR	GOUR	GOUR08	AFT	African taurine	Bos taurus	Modern
SRR19960449	Baoule_BurkinaFaso_Contemporary	BBFC	BBFC	BBFC10	AFT	African taurine	Bos taurus	Modern
SRR19960450	Baoule_BurkinaFaso_Contemporary	BBFC	BBFC	BBFC11	AFT	African taurine	Bos taurus	Modern
[truncated: 2,894 more rows]

## Sheet: S. Table 2
Population	Population Code (dating)	Population Code	Sample ID	Broad Population Group	Broad Population Group (full)	Species	Country	Sampling Period	Source	Modern or Ancient	Coverage	QC_total_reads	QC_mapped_reads	QC_mapped_paired_reads	QC_mapped_bases	QC_sequenced_bases	QC_duplicated_reads_flagged	QC_mean_insert_size	QC_median_insert_size	QC_mean_mapping_quality	QC_ns	QC_gc_percentage	QC_general_error_rate	QC_homopolymer_indels	QC_mean_coverage	QC_percentage_aligned
Tuli	TULI	TULI	TULI07	SAC	South African Composite	Bos taurus/Bos indicus hybrid	Zimbabwe	Recent	Acceligen	Modern	46.7257
Tuli	TULI	TULI	TULI09	SAC	South African Composite	Bos taurus/Bos indicus hybrid	Zimbabwe	Recent	Acceligen	Modern	43.5848
Mashona	MASH	MASH	MASH11	AFS	African Sanga	Bos taurus/Bos indicus hybrid	Zimbabwe	Recent	Acceligen	Modern	43.2213
Mashona	MASH	MASH	MASH10	AFS	African Sanga	Bos taurus/Bos indicus hybrid	Zimbabwe	Recent	Acceligen	Modern	42.6371
Mashona	MASH	MASH	MASH09	AFS	African Sanga	Bos taurus/Bos indicus hybrid	Zimbabwe	Recent	Acceligen	Modern	39.6586
Tuli	TULI	TULI	TULI08	SAC	South African Composite	Bos taurus/Bos indicus hybrid	Zimbabwe	Recent	Acceligen	Modern	36.5755
Mashona	MASH	MASH	MASH08	AFS	African Sanga	Bos taurus/Bos indicus hybrid	Zimbabwe	Recent	Acceligen	Modern	28.6969
Mashona	MASH	MASH	MASH07	AFS	African Sanga	Bos taurus/Bos indicus hybrid	Zimbabwe	Recent	Acceligen	Modern	27.286
Tuli	TULI	TULI	TULI06	SAC	South African Composite	Bos taurus/Bos indicus hybrid	Zimbabwe	Recent	Acceligen	Modern	26.6939
Tuli	TULI	TULI	TULI05	SAC	South African Composite	Bos taurus/Bos indicus hybrid	Zimbabwe	Recent	Acceligen	Modern	25.7048
Tuli	TULI	TULI	TULI04	SAC	South African Composite	Bos taurus/Bos indicus hybrid	Zimbabwe	Recent	Acceligen	Modern	16.3805
Nguni	NGUN	NGUN	NGUN54	AFS	African Sanga	Bos taurus/Bos indicus hybrid	South Africa	2022	University of Pretoria	Modern	13.79	341007186	340516658	340360532	38059398533	38043233915	35834840	28109.4	124	14.2583	645822	47.2	0.69	40.69	13.7939	99.8562
Afrikaner	AFRI	AFRI	AFRI48	AFS	African Sanga	Bos taurus/Bos indicus hybrid	South Africa	2022	University of Pretoria	Modern	12.59	302008080	301608233	301490892	34729041860	34713276786	27478403	15339.1	130	14.4657	597074	46.02	0.67	42.12	12.5868	99.8676
Drakensberger	DRAK	DRAK	DRAK42	SAC	South African Composite	Bos taurus/Bos indicus hybrid	South Africa	2022	University of Pretoria	Modern	12.58	309106150	308659144	308527596	34703472785	34690731487	28877428	19885.5	126	14.5965	602950	46.05	0.56	42.96	12.5776	99.8554
Bonsmara	BONS	BONS	BONS43	SAC	South African Composite	Bos taurus/Bos indicus hybrid	South Africa	2022	University of Pretoria	Modern	12.52	300489786	300048998	299911140	34544165037	34531053123	26831052	17034.9	130	14.5219	585336	45.89	0.62	42.72	12.5198	99.8533
Mashona	MASH	MASH	MASH23	AFS	African Sanga	Bos taurus/Bos indicus hybrid	South Africa	2022	University of Pretoria	Modern	12.11	292171820	290569887	290406822	33424405647	33409612337	28294195	17197.3	128	15.9647	563979	47.28	0.71	41.03	12.114	99.4517
Nguni	NGUN	NGUN	NGUN53	AFS	African Sanga	Bos taurus/Bos indicus hybrid	South Africa	2022	University of Pretoria	Modern	12.02	293206438	292184974	292044612	33154769874	33140185243	28972017	29658.1	130	14.7889	563330	47.08	0.71	41.09	12.0163	99.6516
Tuli	TULI	TULI	TULI50	SAC	South African Composite	Bos taurus/Bos indicus hybrid	South Africa	2022	University of Pretoria	Modern	11.95	292160534	291010100	290898628	32974913937	32960588505	28229607	21265.6	128	15.2687	545582	46.82	0.71	41.47	11.9511	99.6062
Tuli	TULI	TULI	TULI49	SAC	South African Composite	Bos taurus/Bos indicus hybrid	South Africa	2022	University of Pretoria	Modern	11.72	286287022	285876877	285769854	32334349848	32320351345	27062492	18704	127	14.5042	574522	46.49	0.64	41.66	11.7189	99.8567
Drakensberger	DRAK	DRAK	DRAK41	SAC	South African Composite	Bos taurus/Bos indicus hybrid	South Africa	2022	University of Pretoria	Modern	11.68	284470052	283617486	283477450	32229333936	32216231345	27836394	28929.1	127	15.4152	507924	46.75	0.62	41.24	11.6809	99.7003
Nguni	NGUN	NGUN	NGUN55	AFS	African Sanga	Bos taurus/Bos indicus hybrid	South Africa	2022	University of Pretoria	Modern	11.66	278860722	277806496	277673282	32180052409	32165810486	26180103	20207.1	132	15.191	544460	46.69	0.68	41.79	11.663	99.622
Bonsmara	BONS	BONS	BONS42	SAC	South African Composite	Bos taurus/Bos indicus hybrid	South Africa	2022	University of Pretoria	Modern	11.15	268128628	267699315	267582352	30760558139	30748970094	22501416	31017.2	132	14.583	516376	46.46	0.61	42.24	11.1485	99.8399
Drakensberger	DRAK	DRAK	DRAK40	SAC	South African Composite	Bos taurus/Bos indicus hybrid	South Africa	2022	University of Pretoria	Modern	11.15	265415508	265092884	264996638	30775697113	30764242054	23527080	19729.7	134	14.4143	530777	46.47	0.6	42.63	11.154	99.8784
Tuli	TULI	TULI	TULI51	SAC	South African Composite	Bos taurus/Bos indicus hybrid	South Africa	2022	University of Pretoria	Modern	11.11	252813064	252478725	252376482	30660912694	30647614708	20859028	22826	143	14.7533	520784	46.47	0.73	41.26	11.1124	99.8678
Afrikaner	AFRI	AFRI	AFRI49	AFS	African Sanga	Bos taurus/Bos indicus hybrid	South Africa	2022	University of Pretoria	Modern	10.38	244714574	244402140	244291204	28643887489	28630582730	21241414	19299.4	136	14.5172	491463	46.36	0.71	41.58	10.3814	99.8723
NDama_Senegal_1990s	NDST	NDST	NDST08	AFT	African taurine	Bos taurus	Senegal	1992	Previously part of microsatellite study	Modern	7.58	180238758	179929936	179744492	20919902308	20911872778	20481603	19030.1	137	14.4709	88190	45.79	0.64	42.8	7.582	99.8287
Afrikaner	AFRI	AFRI	AFRI47	AFS	African Sanga	Bos taurus/Bos indicus hybrid	South Africa	2022	University of Pretoria	Modern	7.17	178075084	177763313	177685058	19787192139	19778563817	13697587	19233.8	123	14.3691	374941	45.92	0.64	43.05	7.1715	99.8249
NDama_Senegal_1990s	NDST	NDST	NDST15	AFT	African taurine	Bos taurus	Senegal	1992	Previously part of microsatellite study	Modern	6.79	167565708	167131600	166925068	18736247451	18729242800	20618466	23854	129	14.863	80426	46.49	0.64	42.32	6.7906	99.7409
Zebu_Maure	ZBMT	ZBMA	ZBMA24	AFS	African Sanga	Bos indicus	Mauritania	1992	Previously part of microsatellite study	Modern	6.47	157767876	157444177	157301972	17861428407	17852541777	18348565	17671.7	128	14.7175	73629	45.96	0.76	42.4	6.4735	99.7948
NDama_Senegal_1990s	NDST	NDST	NDST02	AFT	African taurine	Bos taurus	Senegal	1992	Previously part of microsatellite study	Modern	6.46	152413058	152214706	152098282	17829180860	17822338682	16352833	17037.8	141	14.3761	69629	46.2	0.68	42.53	6.4618	99.8699
NDama_Senegal_1990s	NDST	NDST	NDST13	AFT	African taurine	Bos taurus	Senegal	1992	Previously part of microsatellite study	Modern	6.44	155891284	155564688	155401446	17762401139	17755359082	17152144	21934.1	134	14.667	73671	46.23	0.65	42.22	6.4376	99.7905
Zebu_Maure	ZBMT	ZBMA	ZBMA23	AFS	African Sanga	Bos indicus	Mauritania	1992	Previously part of microsatellite study	Modern	6.32	146126686	145913208	145795996	17435522269	17426275583	14237681	13298.2	138	14.5813	70761	44.98	0.76	42.91	6.3192	99.8539
Zebu_Maure	ZBMT	ZBMA	ZBMA25	AFS	African Sanga	Bos indicus	Mauritania	1992	Previously part of microsatellite study	Modern	6.29	156692404	156387467	156193812	17354164911	17345363709	18912106	20286.1	124	14.269	71810	45.85	0.8	42.41	6.2897	99.8054
NDama_Senegal_1990s	NDST	NDST	NDST14	AFT	African taurine	Bos taurus	Senegal	1992	Previously part of microsatellite study	Modern	5.8	137882878	137655452	137558650	15989564441	15983410162	13731125	18713.9	135	14.6352	67429	45	0.59	42.83	5.7951	99.8351
White_Fulani	WHIT	WHIT	WHIT19	AFS	African Sanga	Bos indicus	Nigeria	1992	Previously part of microsatellite study	Modern	5.54	123710750	123474665	123312788	15288553842	15279780702	16544497	13574.1	161	14.5777	96339	45.14	0.87	42.13	5.541	99.8092
Sokoto_Gudali	SOKO	SOKO	SOKO35	AFS	African Sanga	Bos indicus	Nigeria	1992	Previously part of microsatellite study	Modern	5.44	122141038	121946776	121837106	14999125287	14990112406	14988774	16849.8	162	14.5525	95054	45.07	0.86	41.94	5.4361	99.841
White_Fulani	WHIT	WHIT	WHIT28	AFS	African Sanga	Bos indicus	Nigeria	1992	Previously part of microsatellite study	Modern	5.42	119220362	118985778	118814526	14945202575	14936442184	16321371	12012.7	160	14.6488	94345	44.93	0.9	42.23	5.4166	99.8032
Mbororo	MBOR	MBOR	MBOR20	AFS	African Sanga	Bos taurus/Bos indicus hybrid	Nigeria	1992	Previously part of microsatellite study	Modern	5.3	119402030	119255205	119155906	14613346877	14604710450	14102946	14761.7	156	14.2292	60332	48.85	0.99	38.38	5.2963	99.877
Sokoto_Gudali	SOKO	SOKO	SOKO43	AFS	African Sanga	Bos indicus	Nigeria	1992	Previously part of microsatellite study	Modern	5.18	120520230	120361437	120276476	14302227823	14293950369	10966617	16483.6	145	14.3764	60922	45.61	0.8	42.05	5.1836	99.8682
Kenana	KNAT	KENA	KENA27	AFI	African Indicine	Bos indicus	South Sudan	1990	Previously part of microsatellite study	Modern	5.17	122483300	122284107	122161672	14276377114	14268143471	17505968	19380	147	14.2959	65970	46.91	0.88	41.45	5.1742	99.8374
White_Fulani	WHIT	WHIT	WHIT12	AFS	African Sanga	Bos indicus	Nigeria	1992	Previously part of microsatellite study	Modern	5.16	116800308	116555410	116371126	14240622460	14232421138	15496972	14805.3	157	14.499	90466	45.15	0.93	41.98	5.1612	99.7903
Kenana	KNAT	KENA	KENA07	AFI	African Indicine	Bos indicus	South Sudan	1990	Previously part of microsatellite study	Modern	5.14	121130386	120912336	120793592	14180541070	14172017241	15072442	18766.5	143	14.5127	63967	46.02	0.88	41.86	5.1395	99.82
Lagune	LAGU	LAGU	LAGU46	AFT	African taurine	Bos taurus	Benin	1992	Previously part of microsatellite study	Modern	5.01	103755380	103603928	103530162	13830125279	13824353271	14164962	9434.22	204	15.092	27752	45.06	0.68	42.13	5.0125	99.854
Sokoto_Gudali	SOKO	SOKO	SOKO44	AFS	African Sanga	Bos indicus	Nigeria	1992	Previously part of microsatellite study	Modern	4.96	114777188	114620792	114525852	13680904873	13673264246	9892292	16461	147	14.3134	56181	45.53	0.81	42.16	4.9584	99.8637
White_Fulani	WHIT	WHIT	WHIT24	AFS	African Sanga	Bos indicus	Nigeria	1992	Previously part of microsatellite study	Modern	4.95	108865238	108616661	108441078	13651666621	13643551591	13070906	13337.4	171	14.5782	86140	45.42	0.94	41.78	4.9478	99.7717
Sokoto_Gudali	SOKO	SOKO	SOKO34	AFS	African Sanga	Bos indicus	Nigeria	1992	Previously part of microsatellite study	Modern	4.9	106309018	106097762	105947108	13526148110	13518157692	14079482	12487.1	184	14.6856	86042	45.18	0.92	41.97	4.9023	99.8013
Borgou	BORG	BORG	BORG21	AFS	African Sanga	Bos taurus/Bos indicus hybrid	Benin	1992	Previously part of microsatellite study	Modern	4.87	102205476	102076633	102011814	13440741607	13433243204	16361176	10970.7	192	14.9955	343065	45.13	0.83	41.28	4.8713	99.8739
Kenana	KNAT	KENA	KENA15	AFI	African Indicine	Bos indicus	South Sudan	1990	Previously part of microsatellite study	Modern	4.87	113297734	113124894	113047698	13442175276	13434207559	14965729	17613.6	149	14.4929	59720	46.34	0.85	41.63	4.8718	99.8474
Lagune	LAGU	LAGU	LAGU48	AFT	African taurine	Bos taurus	Benin	1992	Previously part of microsatellite study	Modern	4.86	101659124	101504007	101431678	13420139486	13414657735	13885375	11073.2	205	14.996	27131	44.82	0.65	42.5	4.8639	99.8474
Kuri	KRIT	KURI	KURI33	AFT	African taurine	Bos taurus	Chad	1992	Previously part of microsatellite study	Modern	4.83	105283828	105091369	104961252	13324985712	13318044040	17106473	15950	175	14.5984	340998	46.39	0.85	40.48	4.8294	99.8172
White_Fulani	WHIT	WHIT	WHIT25	AFS	African Sanga	Bos indicus	Nigeria	1992	Previously part of microsatellite study	Modern	4.83	106256394	106042351	105900920	13334176109	13326155512	13572664	13765.3	169	14.516	83701	45.26	0.9	41.65	4.8327	99.7986
Kenana	KNAT	KENA	KENA20	AFI	African Indicine	Bos indicus	South Sudan	1990	Previously part of microsatellite study	Modern	4.73	111629330	111442173	111338048	13060238067	13052634632	14918366	18706.8	147	14.3367	59392	46.64	0.86	41.55	4.7334	99.8323
Mbororo	MBOR	MBOR	MBOR25	AFS	African Sanga	Bos taurus/Bos indicus hybrid	Nigeria	1992	Previously part of microsatellite study	Modern	4.67	105892352	105709735	105575364	12889660509	12882337381	13629391	17914.6	159	14.1793	54397	49	1.02	38.48	4.6716	99.8275
East_African_Short_Zebu	EASZ	EASZ	EASZ227	AZE	African Indicine Composite	Bos indicus	Kenya	Recent	Olivier Hanotte / Abdulfatai Tijjani	Modern	4.66	91000612	90443085	90370870	12856654764	12848378683	27923114	9709.86	227	15.4935	444689	47.05	0.9	42	4.6596	99.3873
White_Fulani	WHIT	WHIT	WHIT22	AFS	African Sanga	Bos indicus	Nigeria	1992	Previously part of microsatellite study	Modern	4.63	104701996	104520347	104404822	12777025716	12769501179	12735834	13705.3	158	14.4816	81800	45.65	0.9	41.51	4.6308	99.8265
Kuri	KRIT	KURI	KURI36	AFT	African taurine	Bos taurus	Chad	1992	Previously part of microsatellite study	Modern	4.62	100131790	100004599	99935318	12757055064	12750022216	14955359	16716.9	182	14.6963	312681	46.64	0.94	39.95	4.6235	99.873
Kuri	KRIT	KURI	KURI44	AFT	African taurine	Bos taurus	Chad	1992	Previously part of microsatellite study	Modern	4.51	99633762	99460239	99335920	12456164448	12449316553	14842630	19018.5	171	14.428	324338	46.86	0.89	38.86	4.5145	99.8258
Kapsiki	KAPS	KAPS	KAPS44	AFT	African taurine	Bos taurus	Cameroon	1992	Previously part of microsatellite study	Modern	4.49	99219528	99080629	99004572	12395434037	12388540045	14918163	13001.8	172	14.5584	27089	45.08	0.78	39.91	4.4925	99.86
NDama_Nigeria_1990s	NDNT	NDNT	NDNT09	AFT	African taurine	Bos taurus	Nigeria	1992	Previously part of microsatellite study	Modern	4.48	104835386	104675735	104584626	12354786563	12350177518	12050148	15820	145	14.4705	54336	46.21	0.57	42.96	4.4777	99.8477
Kuri	KRIT	KURI	KURI27	AFT	African taurine	Bos taurus	Chad	1992	Previously part of microsatellite study	Modern	4.46	101182126	101048154	100977672	12294963803	12288372371	14901011	12449.3	152	14.5831	312759	45.73	0.76	41.18	4.4561	99.8676
White_Fulani	WHIT	WHIT	WHIT23	AFS	African Sanga	Bos indicus	Nigeria	1992	Previously part of microsatellite study	Modern	4.46	95079396	94905106	94787812	12317356166	12309981805	11021740	10640.1	181	14.7158	77197	45.2	0.93	41.8	4.4642	99.8167
Kenana	KNAT	KENA	KENA30	AFI	African Indicine	Bos indicus	South Sudan	1990	Previously part of microsatellite study	Modern	4.45	104857738	104711082	104639372	12283641540	12276356275	11747918	18673.6	142	14.4174	57446	46.08	0.79	41.85	4.452	99.8601
Kuri	KRIT	KURI	KURI26	AFT	African taurine	Bos taurus	Chad	1992	Previously part of microsatellite study	Modern	4.44	97276316	97152309	97071552	12243900631	12237499547	12956391	11290.5	168	14.6927	294069	45.24	0.94	41.18	4.4376	99.8725
Sokoto_Gudali	SOKO	SOKO	SOKO33	AFS	African Sanga	Bos indicus	Nigeria	1992	Previously part of microsatellite study	Modern	4.44	96917188	96724945	96603680	12238281831	12231303584	11636191	14009.4	173	14.56	75592	45.21	0.94	41	4.4355	99.8016
Kuri	KRIT	KURI	KURI51	AFT	African taurine	Bos taurus	Chad	1992	Previously part of microsatellite study	Modern	4.41	97220066	97075844	97012272	12154008382	12147890571	14467037	11666.1	161	14.6527	313278	46.32	0.76	41.23	4.405	99.8517
Kuri	KRIT	KURI	KURI16	AFT	African taurine	Bos taurus	Chad	1992	Previously part of microsatellite study	Modern	4.4	96231404	95806059	95689944	12134464347	12127702818	14246182	10337.2	175	14.8787	312285	45.05	0.85	40.61	4.3979	99.558
Lagune	LAGU	LAGU	LAGU51	AFT	African taurine	Bos taurus	Benin	1992	Previously part of microsatellite study	Modern	4.39	92135660	91987394	91905020	12116889586	12111734079	13351987	11782.7	209	14.9577	26722	44.98	0.66	42.04	4.3915	99.8391
White_Fulani	WHIT	WHIT	WHIT17	AFS	African Sanga	Bos indicus	Nigeria	1992	Previously part of microsatellite study	Modern	4.38	91793324	91554764	91366060	12072352686	12064718098	10243127	9747.4	189	14.7387	77554	44.9	1.01	41.4	4.3754	99.7401
Sokoto_Gudali	SOKO	SOKO	SOKO22	AFS	African Sanga	Bos indicus	Nigeria	1992	Previously part of microsatellite study	Modern	4.36	94019412	93769858	93598160	12023717396	12016739676	12741511	11149.7	177	14.9155	77104	44.9	0.93	42.32	4.3578	99.7346
White_Fulani	WHIT	WHIT	WHIT20	AFS	African Sanga	Bos indicus	Nigeria	1992	Previously part of microsatellite study	Modern	4.35	95937110	95779308	95687284	11997490532	11990228332	10935934	14800.5	161	14.4977	75530	45.28	0.9	41.76	4.3482	99.8355
Kenana	KNAT	KENA	KENA18	AFI	African Indicine	Bos indicus	South Sudan	1990	Previously part of microsatellite study	Modern	4.34	102222938	101955021	101859904	11970970729	11963797076	13274526	18215.2	147	14.8148	54584	47.32	0.9	40.8	4.3386	99.7379
Mbororo	MBOR	MBOR	MBOR22	AFS	African Sanga	Bos taurus/Bos indicus hybrid	Nigeria	1992	Previously part of microsatellite study	Modern	4.34	95866626	95667944	95515194	11962855371	11955956610	10713708	14925.4	165	14.3357	49384	48.86	1.04	38.89	4.3357	99.7928
Muturu_Nigeria_1990s	MUTT	MUTT	MUTT15	AFT	African taurine	Bos taurus	Nigeria	1992	Previously part of microsatellite study	Modern	4.32	96989804	96829861	96724020	11921921817	11915397362	14041940	14698.1	161	14.5451	131803	45.99	0.87	40.71	4.3209	99.8351
Kenana	KNAT	KENA	KENA29	AFI	African Indicine	Bos indicus	South Sudan	1990	Previously part of microsatellite study	Modern	4.3	102646058	102468725	102388930	11865498819	11858560793	12908175	20860.7	142	14.5574	53795	46.44	0.82	42.1	4.3004	99.8272
Butana	BUTA	BUTA	BUTA42	AFI	African Indicine	Bos indicus	Sudan	1992	Previously part of microsatellite study	Modern	4.28	100861408	100706800	100617234	11816214217	11809342263	11884114	19322.5	141	14.4116	50966	46.28	0.85	41.61	4.2825	99.8467
Zebu_Maure	ZBMT	ZBMA	ZBMA27	AFS	African Sanga	Bos indicus	Mauritania	1992	Previously part of microsatellite study	Modern	4.24	111067016	110926921	110839464	11699217134	11693474753	13295563	24665.4	114	13.9363	50751	46.11	0.69	42.29	4.2401	99.8739
NDama_Senegal_1990s	NDST	NDST	NDST21	AFT	African taurine	Bos taurus	Senegal	1992	Previously part of microsatellite study	Modern	4.22	98026850	97870955	97775374	11630325114	11625672745	8776420	13922.1	139	14.6252	46795	45.38	0.67	42.94	4.2152	99.841
Butana	BUTA	BUTA	BUTA41	AFI	African Indicine	Bos indicus	Sudan	1992	Previously part of microsatellite study	Modern	4.21	97941508	97822620	97758206	11620587215	11613596996	10167395	16858.2	147	14.3972	52236	45.8	0.83	41.85	4.2116	99.8786
Kenana	KNAT	KENA	KENA33	AFI	African Indicine	Bos indicus	South Sudan	1990	Previously part of microsatellite study	Modern	4.21	102950066	102809555	102724400	11614502384	11607609474	14474926	21193	132	14.253	53498	46.5	0.79	41.37	4.2094	99.8635
Sokoto_Gudali	SOKO	SOKO	SOKO31	AFS	African Sanga	Bos indicus	Nigeria	1992	Previously part of microsatellite study	Modern	4.21	91715868	91507991	91348976	11623181457	11616252474	10774724	12229.7	176	14.5913	73474	45.23	0.96	40.9	4.2126	99.7733
Kenana	KNAT	KENA	KENA19	AFI	African Indicine	Bos indicus	South Sudan	1990	Previously part of microsatellite study	Modern	4.19	98618480	98396063	98318046	11556640696	11549872131	12451914	17115.5	146	14.5572	52044	47.05	0.86	41.62	4.1885	99.7745
NDama_Senegal_1990s	NDST	NDST	NDST12	AFT	African taurine	Bos taurus	Senegal	1992	Previously part of microsatellite study	Modern	4.18	95456242	95308409	95230036	11524849810	11520219546	9625641	16637.5	153	14.5528	48282	45.6	0.65	42.43	4.177	99.8451
East_African_Short_Zebu	EASZ	EASZ	EASZ223	AZE	African Indicine Composite	Bos indicus	Kenya	Recent	Olivier Hanotte / Abdulfatai Tijjani	Modern	4.18	81624498	80059226	79986440	11524255112	11519783635	24856224	5169.36	251	16.8538	410056	48.33	0.63	42.1	4.1767	98.0824
Kenana	KNAT	KENA	KENA11	AFI	African Indicine	Bos indicus	South Sudan	1990	Previously part of microsatellite study	Modern	4.13	96916598	96712714	96600552	11389841674	11383094987	12414259	18539.1	147	14.633	52021	45.98	0.88	41.9	4.128	99.7896
White_Fulani	WHIT	WHIT	WHIT27	AFS	African Sanga	Bos indicus	Nigeria	1992	Previously part of microsatellite study	Modern	4.13	88555416	88394879	88287872	11404205872	11397314206	9165862	11320.8	180	14.6896	71110	44.86	0.89	41.97	4.1332	99.8187
Kuri	KRIT	KURI	KURI29	AFT	African taurine	Bos taurus	Chad	1992	Previously part of microsatellite study	Modern	4.11	88795784	88623612	88497246	11331586972	11325357995	12796351	10536.8	175	14.7581	295903	45.24	0.84	40.94	4.1069	99.8061
Butana	BUTA	BUTA	BUTA38	AFI	African Indicine	Bos indicus	Sudan	1992	Previously part of microsatellite study	Modern	4.1	93720054	93475497	93330554	11302359911	11295578402	9526365	16676.4	155	14.6218	48584	45.84	0.9	41.93	4.0963	99.7391
Mbororo	MBOR	MBOR	MBOR21	AFS	African Sanga	Bos taurus/Bos indicus hybrid	Nigeria	1992	Previously part of microsatellite study	Modern	4.1	92601292	92490094	92418926	11310024376	11303561766	10862855	16563.4	157	14.2475	45863	49.08	0.98	38.4	4.0991	99.8799
Great_Zimbabwe	GRZW	GRZW	GRZW	GRZW	Ancient cattle	ancient Bos taurus	Zimbabwe		Mica Jones	Ancient	4.1
Kenana	KNAT	KENA	KENA10	AFI	African Indicine	Bos indicus	South Sudan	1990	Previously part of microsatellite study	Modern	4.09	96111246	95941093	95871928	11273610108	11266779418	11936068	18306.3	145	14.5569	50979	46	0.85	41.6	4.0859	99.823
Lagune	LAGU	LAGU	LAGU52	AFT	African taurine	Bos taurus	Benin	1992	Previously part of microsatellite study	Modern	4.09	86204698	86069842	85994908	11290690245	11285554756	12160816	12005.2	202	14.7922	24606	44.73	0.67	42.15	4.0921	99.8436
Boran	BORA	BORA	BORA04	AFI	African Indicine	Bos indicus	Kenya	2000	Previously part of microsatellite study	Modern	4.06	92360718	92242519	92171674	11189438069	11182785369	12444278	16861.7	155	14.479	50340	46.67	0.87	41.51	4.0554	99.872
NDama_Senegal_1990s	NDST	NDST	NDST10	AFT	African taurine	Bos taurus	Senegal	1992	Previously part of microsatellite study	Modern	4.06	96871542	96741817	96676398	11199672763	11195096611	11203385	17927.8	137	14.2742	47416	47.17	0.67	40.59	4.0591	99.8661
Kapsiki	KAPS	KAPS	KAPS10	AFT	African taurine	Bos taurus	Cameroon	1992	Previously part of microsatellite study	Modern	4.05	93182564	92844646	92780572	11166700826	11160976987	14488054	18576.9	154	14.5274	23923	46.76	0.75	38.83	4.0471	99.6374
East_African_Short_Zebu	EASZ	EASZ	EASZ030	AZE	African Indicine Composite	Bos indicus	Kenya	Recent	Olivier Hanotte / Abdulfatai Tijjani	Modern	4.02	76856366	76600728	76532880	11082652750	11077161642	19589873	9129.73	253	15.3256	380355	45.93	0.7	43.17	4.0167	99.6674
Lagune	LAGU	LAGU	LAGU32	AFT	African taurine	Bos taurus	Benin	1992	Previously part of microsatellite study	Modern	4.01	84323046	84159672	84075030	11067130571	11062483559	12421534	11170.7	200	14.8501	24320	45.24	0.66	41.8	4.0111	99.8063
East_African_Short_Zebu	EASZ	EASZ	EASZ239	AZE	African Indicine Composite	Bos indicus	Kenya	Recent	Olivier Hanotte / Abdulfatai Tijjani	Modern	3.97	77879480	76794038	76733776	10951202204	10943948193	21105672	8756.79	229	16.0227	366964	48.46	0.94	40.64	3.969	98.6063
Kuri	KRIT	KURI	KURI24	AFT	African taurine	Bos taurus	Chad	1992	Previously part of microsatellite study	Modern	3.95	87844088	87741898	87677536	10890969682	10885128778	14398647	11322.1	160	14.6505	284084	45.3	0.76	40.92	3.9472	99.8837
Lagune	LAGU	LAGU	LAGU42	AFT	African taurine	Bos taurus	Benin	1992	Previously part of microsatellite study	Modern	3.95	82403942	82222218	82112186	10890669086	10885955236	11439607	11518.5	213	14.9539	23313	44.96	0.72	42.23	3.9471	99.7795
Lagune	LAGU	LAGU	LAGU50	AFT	African taurine	Bos taurus	Benin	1992	Previously part of microsatellite study	Modern	3.95	83960844	83793438	83714398	10900923347	10896271807	12089981	13026.7	198	14.8183	23621	45.35	0.66	41.85	3.9508	99.8006
Namchi	NAMC	NAMC	NAMC37	AFT	African taurine	Bos taurus	Cameroon	1992	Previously part of microsatellite study	Modern	3.95	91784254	91683360	91615076	10888547848	10883351399	12335369	13987.1	139	14.2484	65905	46.04	0.72	39.38	3.9463	99.8901
Butana	BUTA	BUTA	BUTA23	AFI	African Indicine	Bos indicus	Sudan	1992	Previously part of microsatellite study	Modern	3.94	91194834	91012228	90897392	10865190175	10858700204	9546940	16649.6	148	14.4307	48061	45.39	0.85	42.33	3.9379	99.7998
Mbororo	MBOR	MBOR	MBOR26	AFS	African Sanga	Bos taurus/Bos indicus hybrid	Nigeria	1992	Previously part of microsatellite study	Modern	3.94	95210108	95097826	95027810	10865210877	10859172176	10119958	19798.8	133	14.1956	45272	46.42	0.8	41.07	3.9379	99.8821
Mbororo	MBOR	MBOR	MBOR33	AFS	African Sanga	Bos taurus/Bos indicus hybrid	Nigeria	1992	Previously part of microsatellite study	Modern	3.93	90215440	90074912	89977902	10833068551	10826747411	8142355	14956.7	147	14.3403	45460	46.23	0.89	40.76	3.9262	99.8442
Borgou	BORG	BORG	BORG27	AFS	African Sanga	Bos taurus/Bos indicus hybrid	Benin	1992	Previously part of microsatellite study	Modern	3.92	84373678	84297667	84254782	10818539353	10813504734	12395294	9276.37	174	14.7241	269203	44.97	0.65	42.66	3.921	99.9099
Kuri	KRIT	KURI	KURI50	AFT	African taurine	Bos taurus	Chad	1992	Previously part of microsatellite study	Modern	3.9	89507542	89398780	89331082	10757322233	10751863844	13394106	14475.6	149	14.452	279674	45.76	0.82	41.66	3.8988	99.8785
Kuri	KRIT	KURI	KURI17	AFT	African taurine	Bos taurus	Chad	1992	Previously part of microsatellite study	Modern	3.89	86346498	86225877	86142884	10728161986	10722239277	13368921	11313.5	162	14.6668	276793	45.27	0.82	40.96	3.8882	99.8603
Borgou	BORG	BORG	BORG23	AFS	African Sanga	Bos taurus/Bos indicus hybrid	Benin	1992	Previously part of microsatellite study	Modern	3.87	80640116	80499420	80406230	10669196706	10663345848	11525769	11507.3	202	14.9056	275469	44.94	0.85	41.48	3.8668	99.8255
NDama_Nigeria_1990s	NDNT	NDNT	NDNT02	AFT	African taurine	Bos taurus	Nigeria	1992	Previously part of microsatellite study	Modern	3.87	86730118	86608937	86538156	10670827174	10666361442	8035316	13548.2	163	14.6405	48628	45.77	0.65	42.67	3.8674	99.8603
White_Fulani	WHIT	WHIT	WHIT21	AFS	African Sanga	Bos indicus	Nigeria	1992	Previously part of microsatellite study	Modern	3.87	86105036	85999269	85931274	10667435078	10661335913	9078239	13529.3	161	14.4528	58345	45.37	1.05	41.64	3.8662	99.8772
East_African_Short_Zebu	EASZ	EASZ	EASZ229	AZE	African Indicine Composite	Bos indicus	Kenya	Recent	Olivier Hanotte / Abdulfatai Tijjani	Modern	3.87	76752922	75745383	75684250	10682467220	10675403619	22825927	9176.13	216	15.8452	376406	48.38	0.98	40.57	3.8716	98.6873
NDama_Nigeria_1990s	NDNT	NDNT	NDNT03	AFT	African taurine	Bos taurus	Nigeria	1992	Previously part of microsatellite study	Modern	3.86	86970730	86828599	86747690	10640872383	10636341455	9269979	13531.6	162	14.6763	47425	46.1	0.68	42.48	3.8566	99.8366
East_African_Short_Zebu	EASZ	EASZ	EASZ218	AZE	African Indicine Composite	Bos indicus	Kenya	Recent	Olivier Hanotte / Abdulfatai Tijjani	Modern	3.84	74168050	73918687	73869498	10590398524	10583882198	22611409	7166.34	231	15.0131	373979	46.71	0.84	41.99	3.8383	99.6638
NDama_Nigeria_1990s	NDNT	NDNT	NDNT05	AFT	African taurine	Bos taurus	Nigeria	1992	Previously part of microsatellite study	Modern	3.83	84498758	84336465	84235474	10571900477	10567395911	8986084	11231.5	168	14.6558	46708	45.74	0.72	42.02	3.8316	99.8079
Butana	BUTA	BUTA	BUTA22	AFI	African Indicine	Bos indicus	Sudan	1992	Previously part of microsatellite study	Modern	3.81	87468022	87318698	87241702	10514811525	10508566140	8406526	15930	151	14.5238	45467	45.34	0.81	42.55	3.8109	99.8293
Kenana	KNAT	KENA	KENA38	AFI	African Indicine	Bos indicus	South Sudan	1990	Previously part of microsatellite study	Modern	3.81	85654448	85491345	85410736	10514402639	10508214599	9871463	14420.2	160	14.5504	47351	46.06	0.87	42.04	3.8107	99.8096
Kuri	KRIT	KURI	KURI35	AFT	African taurine	Bos taurus	Chad	1992	Previously part of microsatellite study	Modern	3.81	80482916	80324032	80210302	10504274685	10498644642	13387954	15436	191	14.726	269707	46.15	0.9	40.93	3.8071	99.8026
White_Fulani	WHIT	WHIT	WHIT13	AFS	African Sanga	Bos indicus	Nigeria	1992	Previously part of microsatellite study	Modern	3.81	83271072	83132306	83045798	10517470851	10511250883	9691564	11619.6	171	14.7385	63543	45.49	0.98	41.51	3.8118	99.8334
East_African_Short_Zebu	EASZ	EASZ	EASZ238	AZE	African Indicine Composite	Bos indicus	Kenya	Recent	Olivier Hanotte / Abdulfatai Tijjani	Modern	3.81	74749290	74485967	74431952	10506583399	10501048661	22713469	5826.9	206	15.2497	363075	48.14	0.79	40.94	3.8079	99.6477
Lagune	LAGU	LAGU	LAGU26	AFT	African taurine	Bos taurus	Benin	1992	Previously part of microsatellite study	Modern	3.8	76720794	76528129	76399640	10473066886	10467967628	9332237	8932.31	228	15.1027	21003	44.17	0.83	42.75	3.7958	99.7489
Lagune	LAGU	LAGU	LAGU44	AFT	African taurine	Bos taurus	Benin	1992	Previously part of microsatellite study	Modern	3.8	79613160	79492308	79432794	10480777263	10476160894	11052402	11351.9	202	15.033	21296	45.09	0.68	41.94	3.7985	99.8482
Borgou	BORG	BORG	BORG35	AFS	African Sanga	Bos taurus/Bos indicus hybrid	Benin	1992	Previously part of microsatellite study	Modern	3.79	79356498	79242378	79174426	10445272602	10439622691	11089214	9392.9	195	14.9048	269198	45.09	0.8	41.86	3.7857	99.8562
Kapsiki	KAPS	KAPS	KAPS46	AFT	African taurine	Bos taurus	Cameroon	1992	Previously part of microsatellite study	Modern	3.79	86734842	86614721	86558812	10454195403	10448240796	13071388	14333.8	150	14.4774	22995	45.59	0.77	38.92	3.7889	99.8615
Mbororo	MBOR	MBOR	MBOR30	AFS	African Sanga	Bos taurus/Bos indicus hybrid	Nigeria	1992	Previously part of microsatellite study	Modern	3.79	86248160	86087358	85965002	10445643102	10439371780	9356891	15594.4	152	14.2302	43087	48.67	1.02	38.16	3.7858	99.8136
East_African_Short_Zebu	EASZ	EASZ	EASZ106	AZE	African Indicine Composite	Bos indicus	Kenya	Recent	Olivier Hanotte / Abdulfatai Tijjani	Modern	3.79	72834978	72352897	72216116	10471097580	10465642222	19263500	10339.5	282	15.3584	355267	45.88	0.84	42.53	3.795	99.3381
Butana	BUTA	BUTA	BUTA36	AFI	African Indicine	Bos indicus	Sudan	1992	Previously part of microsatellite study	Modern	3.78	88717008	88257097	88177934	10438937070	10432767253	9642320	16862.5	146	14.9536	46624	45.49	0.83	42.15	3.7834	99.4816
Butana	BUTA	BUTA	BUTA26	AFI	African Indicine	Bos indicus	Sudan	1992	Previously part of microsatellite study	Modern	3.78	88148892	87975197	87853216	10421138381	10414949318	9317641	21468	151	14.2942	46727	45.97	0.88	41.78	3.7769	99.803
East_African_Short_Zebu	EASZ	EASZ	EASZ079	AZE	African Indicine Composite	Bos indicus	Kenya	Recent	Olivier Hanotte / Abdulfatai Tijjani	Modern	3.77	73325184	73037446	72988518	10395000944	10389660738	18824644	6861.48	220	15.4653	354073	45.96	0.71	43.28	3.7675	99.6076
NDama_Nigeria_1990s	NDNT	NDNT	NDNT13	AFT	African taurine	Bos taurus	Nigeria	1992	Previously part of microsatellite study	Modern	3.74	86427534	86276852	86176878	10311286263	10307199900	8944809	16330.1	154	14.5876	45668	46.01	0.65	42.85	3.7371	99.8257
Kapsiki	KAPS	KAPS	KAPS17	AFT	African taurine	Bos taurus	Cameroon	1992	Previously part of microsatellite study	Modern	3.73	81800738	81595413	81525340	10292779227	10287333393	12588153	12714.6	178	14.9183	22532	45.79	0.8	40.51	3.7304	99.749
Kuri	KRIT	KURI	KURI31	AFT	African taurine	Bos taurus	Chad	1992	Previously part of microsatellite study	Modern	3.73	82457406	82349754	82276280	10301431841	10296087031	12635659	11724.7	169	14.6608	266994	45.43	0.77	41.05	3.7335	99.8694
Lagune	LAGU	LAGU	LAGU24	AFT	African taurine	Bos taurus	Benin	1992	Previously part of microsatellite study	Modern	3.73	78541834	78427035	78364968	10299798752	10295054420	10468974	10253.9	200	15.0358	20905	44.73	0.72	42.76	3.733	99.8538
Lagune	LAGU	LAGU	LAGU30	AFT	African taurine	Bos taurus	Benin	1992	Previously part of microsatellite study	Modern	3.72	79071098	78902102	78816606	10268688327	10264541799	11171433	10049.1	193	14.9728	22894	45.23	0.63	42.3	3.7217	99.7863
Sokoto_Gudali	SOKO	SOKO	SOKO28	AFS	African Sanga	Bos indicus	Nigeria	1992	Previously part of microsatellite study	Modern	3.71	80621656	80474224	80373604	10235614605	10229357621	9072058	11733.7	173	14.7277	64136	45.19	0.92	41.56	3.7097	99.8171
Zebu_Maure	ZBMT	ZBMA	ZBMA31	AFS	African Sanga	Bos indicus	Mauritania	1992	Previously part of microsatellite study	Modern	3.71	104340624	104185251	104100364	10230590828	10225663021	14894955	32916	102	13.6175	42966	46.42	0.67	42.49	3.7079	99.8511
White_Fulani	WHIT	WHIT	WHIT14	AFS	African Sanga	Bos indicus	Nigeria	1992	Previously part of microsatellite study	Modern	3.69	79754384	79591894	79477188	10187450534	10181141087	8865778	12765.7	174	14.6051	65134	45.21	0.94	40.92	3.6922	99.7963
Kenana	KNAT	KENA	KENA35	AFI	African Indicine	Bos indicus	South Sudan	1990	Previously part of microsatellite study	Modern	3.68	87050286	86909843	86849014	10165473333	10159495316	10619701	20514.7	149	14.3296	47045	46.44	0.85	41.66	3.6843	99.8387
Borgou	BORG	BORG	BORG18	AFS	African Sanga	Bos taurus/Bos indicus hybrid	Benin	1992	Previously part of microsatellite study	Modern	3.67	75175582	74981549	74837766	10136160561	10130817455	11324108	9477.72	227	14.871	264131	44.93	0.91	41.97	3.6736	99.7419
East_African_Short_Zebu	EASZ	EASZ	EASZ155	AZE	African Indicine Composite	Bos indicus	Kenya	Recent	Olivier Hanotte / Abdulfatai Tijjani	Modern	3.67	72409666	72099778	72029896	10130155328	10124166033	26799454	11890.2	219	15.0397	353537	54.44	1.23	37.46	3.6715	99.572
Lagune	LAGU	LAGU	LAGU49	AFT	African taurine	Bos taurus	Benin	1992	Previously part of microsatellite study	Modern	3.66	77826354	77703907	77628070	10100500448	10095738272	10139758	12470.4	197	14.9436	20621	45.64	0.78	40.63	3.6607	99.8427
Sokoto_Gudali	SOKO	SOKO	SOKO13	AFS	African Sanga	Bos indicus	Nigeria	1992	Previously part of microsatellite study	Modern	3.66	79487150	79361021	79286744	10097076023	10090788705	11055683	12179.4	184	14.6241	113463	45.17	0.9	41.11	3.6595	99.8413
Zebu_Maure	ZBMT	ZBMA	ZBMA14	AFS	African Sanga	Bos indicus	Mauritania	1992	Previously part of microsatellite study	Modern	3.65	86709906	86574520	86482832	10061631303	10056314959	8425185	15560	132	14.3325	41488	45.57	0.79	42.5	3.6466	99.8439
Lagune	LAGU	LAGU	LAGU28	AFT	African taurine	Bos taurus	Benin	1992	Previously part of microsatellite study	Modern	3.63	78326876	78194085	78133718	10016308897	10012357616	11258120	11025.1	180	14.8009	22348	44.99	0.58	42.82	3.6302	99.8305
Lagune	LAGU	LAGU	LAGU33	AFT	African taurine	Bos taurus	Benin	1992	Previously part of microsatellite study	Modern	3.61	76514658	76374651	76311534	9955369968	9951238023	10710949	11708.4	191	14.9782	21111	45.23	0.63	42.29	3.6081	99.817
Boran	BORA	BORA	BORA03	AFI	African Indicine	Bos indicus	Kenya	2000	Previously part of microsatellite study	Modern	3.6	83530442	83411507	83337430	9945958025	9940085976	9408145	17620.2	146	14.308	44175	45.72	0.85	42.42	3.6047	99.8576
White_Fulani	WHIT	WHIT	WHIT04	AFS	African Sanga	Bos indicus	Nigeria	1992	Previously part of microsatellite study	Modern	3.6	79051488	77946891	77817842	9926429387	9920320515	9158593	12206.6	172	15.7222	62656	45.27	0.96	41.32	3.5976	98.6027
Kenana	KNAT	KENA	KENA09	AFI	African Indicine	Bos indicus	South Sudan	1990	Previously part of microsatellite study	Modern	3.58	83241582	83117239	83043132	9888837321	9883007510	8505665	17771.7	148	14.3439	44397	45.19	0.79	42.7	3.584	99.8506
White_Fulani	WHIT	WHIT	WHIT10	AFS	African Sanga	Bos indicus	Nigeria	1992	Previously part of microsatellite study	Modern	3.58	78731894	78582281	78484632	9881134992	9875164944	8738037	12626.2	169	14.7092	61504	44.93	0.91	41.95	3.5812	99.81
Lagune	LAGU	LAGU	LAGU45	AFT	African taurine	Bos taurus	Benin	1992	Previously part of microsatellite study	Modern	3.57	77056602	76927911	76856798	9846476156	9842377899	10417029	13830.9	181	14.8413	21546	45.1	0.61	42.94	3.5687	99.833
NDama_Nigeria_1990s	NDNT	NDNT	NDNT15	AFT	African taurine	Bos taurus	Nigeria	1992	Previously part of microsatellite study	Modern	3.57	83117220	83005718	82939254	9859027524	9855043612	8753200	16691	151	14.451	42949	46.19	0.66	42.87	3.5732	99.8658
Sokoto_Gudali	SOKO	SOKO	SOKO37	AFS	African Sanga	Bos indicus	Nigeria	1992	Previously part of microsatellite study	Modern	3.56	76493078	76264658	76075004	9828610385	9822765222	8938247	10764.5	176	14.6286	60444	45.11	1.1	41.53	3.5622	99.7014
Borgou	BORG	BORG	BORG26	AFS	African Sanga	Bos taurus/Bos indicus hybrid	Benin	1992	Previously part of microsatellite study	Modern	3.55	74432888	74299421	74211838	9805977660	9800796512	10895609	10749.1	201	15.014	254063	45.17	0.82	41.61	3.554	99.8207
Kapsiki	KAPS	KAPS	KAPS13	AFT	African taurine	Bos taurus	Cameroon	1992	Previously part of microsatellite study	Modern	3.55	79921364	79825307	79777036	9791807742	9786646689	12192216	14896.3	159	14.5072	20953	45.73	0.74	39.35	3.5488	99.8798
Zebu_Maure	ZBMT	ZBMA	ZBMA13	AFS	African Sanga	Bos indicus	Mauritania	1992	Previously part of microsatellite study	Modern	3.54	83494344	83387763	83327782	9773016751	9767580720	8574113	16485.6	138	14.4386	40534	45.22	0.81	42.07	3.542	99.8723
Borgou	BORG	BORG	BORG20	AFS	African Sanga	Bos taurus/Bos indicus hybrid	Benin	1992	Previously part of microsatellite study	Modern	3.53	74599090	74502392	74447284	9739464140	9734146515	10290663	11173.6	192	14.7714	250247	45.19	0.79	40.8	3.5299	99.8704
Kenana	KNAT	KENA	KENA25	AFI	African Indicine	Bos indicus	South Sudan	1990	Previously part of microsatellite study	Modern	3.53	84141308	84000200	83931584	9750154688	9744511794	11180359	19009.9	140	14.48	44386	46.57	0.8	41.86	3.5337	99.8323
Kenana	KNAT	KENA	KENA08	AFI	African Indicine	Bos indicus	South Sudan	1990	Previously part of microsatellite study	Modern	3.53	81918690	81744468	81627786	9753345405	9747633768	8330124	19531.1	154	14.4099	43820	46.14	0.85	42.21	3.5349	99.7873
Lagune	LAGU	LAGU	LAGU25	AFT	African taurine	Bos taurus	Benin	1992	Previously part of microsatellite study	Modern	3.53	74969030	74835862	74750574	9733681790	9728855444	10607866	11574.8	193	14.8829	21611	44.95	0.75	42.28	3.5278	99.8224
Lagune	LAGU	LAGU	LAGU37	AFT	African taurine	Bos taurus	Benin	1992	Previously part of microsatellite study	Modern	3.53	74885450	74741198	74662208	9746289978	9742195746	10075740	11635.2	194	14.8729	21198	45.52	0.68	42.02	3.5323	99.8074
Kuri	KRIT	KURI	KURI22	AFT	African taurine	Bos taurus	Chad	1992	Previously part of microsatellite study	Modern	3.52	76742616	76639315	76577322	9711373682	9705672000	10974252	10666.8	174	14.7749	253312	45.17	0.84	40.22	3.5197	99.8654
Kuri	KRIT	KURI	KURI23	AFT	African taurine	Bos taurus	Chad	1992	Previously part of microsatellite study	Modern	3.51	77056382	76982378	76931104	9671848886	9666568597	9884840	11159.8	169	14.6307	247793	45.24	0.76	40.96	3.5054	99.904
Lagune	LAGU	LAGU	LAGU47	AFT	African taurine	Bos taurus	Benin	1992	Previously part of microsatellite study	Modern	3.51	75271394	75161322	75105698	9698224245	9694234913	10826455	12365.9	184	14.8439	20778	45.07	0.61	41.99	3.5149	99.8538
Lagune	LAGU	LAGU	LAGU12	AFT	African taurine	Bos taurus	Benin	1992	Previously part of microsatellite study	Modern	3.51	75206344	75085460	75024252	9696516494	9692623891	11017566	11089.5	188	14.7412	21348	44.95	0.61	42.64	3.5143	99.8393
Mbororo	MBOR	MBOR	MBOR23	AFS	African Sanga	Bos taurus/Bos indicus hybrid	Nigeria	1992	Previously part of microsatellite study	Modern	3.51	79390938	79289334	79220948	9689418897	9683574412	8934525	15985.7	158	14.2429	40263	48.95	1.04	37.39	3.5117	99.872
White_Fulani	WHIT	WHIT	WHIT15	AFS	African Sanga	Bos indicus	Nigeria	1992	Previously part of microsatellite study	Modern	3.51	76562098	76394643	76280388	9685556192	9679842301	8382812	12307.7	166	14.6595	60718	45.39	0.91	41.35	3.5103	99.7813
Borgou	BORG	BORG	BORG50	AFS	African Sanga	Bos taurus/Bos indicus hybrid	Benin	1992	Previously part of microsatellite study	Modern	3.5	74657464	74008295	73913944	9657622834	9652502737	11081369	11631.3	195	15.6895	245580	44.66	0.81	41.89	3.5002	99.1305
Kapsiki	KAPS	KAPS	KAPS14	AFT	African taurine	Bos taurus	Cameroon	1992	Previously part of microsatellite study	Modern	3.5	83046876	82941509	82876684	9644325557	9639478602	13122683	23660.6	144	13.9764	20930	46.75	0.76	37.65	3.4954	99.8731
Lagune	LAGU	LAGU	LAGU09	AFT	African taurine	Bos taurus	Benin	1992	Previously part of microsatellite study	Modern	3.5	73362902	73232487	73163486	9666092036	9662344024	10443486	9685.34	205	14.965	20580	44.58	0.63	43.36	3.5033	99.8222
Kapsiki	KAPS	KAPS	KAPS45	AFT	African taurine	Bos taurus	Cameroon	1992	Previously part of microsatellite study	Modern	3.49	77391778	77260519	77192220	9621594546	9616233578	11472455	15085.2	167	14.6136	20920	45.05	0.8	39.85	3.4872	99.8304
White_Fulani	WHIT	WHIT	WHIT07	AFS	African Sanga	Bos indicus	Nigeria	1992	Previously part of microsatellite study	Modern	3.49	74886528	74775820	74704152	9620755323	9614866343	7967447	10130	177	14.7113	60576	45.07	0.9	41.4	3.4868	99.8522
Boran	BORA	BORA	BORA01	AFI	African Indicine	Bos indicus	Kenya	2000	Previously part of microsatellite study	Modern	3.48	80464986	80345431	80276366	9589357067	9583523176	9461323	17237.2	146	14.4994	41386	45.61	0.88	42.01	3.4755	99.8514
Kapsiki	KAPS	KAPS	KAPS12	AFT	African taurine	Bos taurus	Cameroon	1992	Previously part of microsatellite study	Modern	3.48	79731030	79599765	79531498	9597656885	9592623885	11963445	13843.4	149	14.4175	21139	45.78	0.74	39.36	3.4785	99.8354
Kuri	KRIT	KURI	KURI30	AFT	African taurine	Bos taurus	Chad	1992	Previously part of microsatellite study	Modern	3.48	76678738	76595202	76546396	9615507237	9610248350	12049376	10764.5	166	14.5813	250810	45.13	0.77	40.88	3.4849	99.8911
NDama_Guinea_1990s	NDAG	NDAG	NDAG22	AFT	African taurine	Bos taurus	Guinea	1992	Previously part of microsatellite study	Modern	3.47	75791190	75710388	75661110	9563521152	9559834559	9712707	11082.4	178	14.7479	106601	45.66	0.66	42.35	3.4661	99.8934
East_African_Short_Zebu	EASZ	EASZ	EASZ133	AZE	African Indicine Composite	Bos indicus	Kenya	Recent	Olivier Hanotte / Abdulfatai Tijjani	Modern	3.47	67266224	67021374	66976856	9582325309	9578700708	17941076	5493.43	223	15.6272	321238	46.85	0.55	43.35	3.4729	99.636
Lagune	LAGU	LAGU	LAGU10	AFT	African taurine	Bos taurus	Benin	1992	Previously part of microsatellite study	Modern	3.46	71768070	71593960	71504412	9533146654	9529395269	9580679	9810.72	213	15.0219	20766	44.42	0.67	43.37	3.4551	99.7574
Kapsiki	KAPS	KAPS	KAPS41	AFT	African taurine	Bos taurus	Cameroon	1992	Previously part of microsatellite study	Modern	3.45	79354250	79199557	79139044	9525279913	9519963006	11959848	14758	150	14.6059	21176	45.35	0.74	39.76	3.4522	99.8051
Kapsiki	KAPS	KAPS	KAPS42	AFT	African taurine	Bos taurus	Cameroon	1992	Previously part of microsatellite study	Modern	3.45	77855774	77753411	77690954	9514153330	9508399992	11479753	15423.8	164	14.5218	20548	45.71	0.86	39.5	3.4482	99.8685
Kuri	KRIT	KURI	KURI46	AFT	African taurine	Bos taurus	Chad	1992	Previously part of microsatellite study	Modern	3.45	76234134	76099978	76051598	9523102149	9517881449	10838431	17905.6	169	14.6711	244056	46.42	0.85	40.21	3.4515	99.824
Zebu_Maure	ZBMT	ZBMA	ZBMA28	AFS	African Sanga	Bos indicus	Mauritania	1992	Previously part of microsatellite study	Modern	3.45	89507654	86903185	86784346	9513876303	9509004415	8877592	18748.6	123	15.421	39690	45.39	0.73	42.73	3.4481	97.0902
Lagune	LAGU	LAGU	LAGU08	AFT	African taurine	Bos taurus	Benin	1992	Previously part of microsatellite study	Modern	3.44	73050586	72936585	72874082	9491079348	9487383560	10161754	10610.6	191	14.8355	20890	44.91	0.61	43.29	3.4399	99.8439
NDama_Nigeria_1990s	NDNT	NDNT	NDNT06	AFT	African taurine	Bos taurus	Nigeria	1992	Previously part of microsatellite study	Modern	3.44	79086334	78980084	78933660	9495973157	9492107215	7760349	14557.8	151	14.5774	35329	46.02	0.72	42.55	3.4416	99.8657
East_African_Short_Zebu	EASZ	EASZ	EASZ199	AZE	African Indicine Composite	Bos indicus	Kenya	Recent	Olivier Hanotte / Abdulfatai Tijjani	Modern	3.43	66427020	66156809	66102402	9469811124	9465318343	20991301	6567.67	236	15.6019	335616	45.81	0.69	43.31	3.4321	99.5932
Kenana	KNAT	KENA	KENA39	AFI	African Indicine	Bos indicus	South Sudan	1990	Previously part of microsatellite study	Modern	3.41	77551438	77483932	77450122	9406123918	9400593289	8231679	14344.9	148	14.3852	39276	45.36	0.81	42.33	3.4091	99.913
Kuri	KRIT	KURI	KURI42	AFT	African taurine	Bos taurus	Chad	1992	Previously part of microsatellite study	Modern	3.41	74373256	74293348	74246280	9413998535	9408919729	10741563	15032.4	170	14.5769	244979	46.15	0.81	40.7	3.4119	99.8926
Mbororo	MBOR	MBOR	MBOR28	AFS	African Sanga	Bos taurus/Bos indicus hybrid	Nigeria	1992	Previously part of microsatellite study	Modern	3.41	77346054	77234553	77165600	9404255031	9398644833	8065100	13321.5	152	14.3979	38291	47.33	1.02	39.48	3.4084	99.8558
Sokoto_Gudali	SOKO	SOKO	SOKO32	AFS	African Sanga	Bos indicus	Nigeria	1992	Previously part of microsatellite study	Modern	3.41	73981778	73906759	73858574	9398082950	9392676007	8536708	12383.1	172	14.6536	60462	45.16	0.82	41.28	3.4061	99.8986
Butana	BUTA	BUTA	BUTA27	AFI	African Indicine	Bos indicus	Sudan	1992	Previously part of microsatellite study	Modern	3.4	81872028	81770843	81718016	9385251004	9379749604	8928361	20596.8	137	14.1896	42275	45.56	0.78	42.22	3.4015	99.8764
Borgou	BORG	BORG	BORG24	AFS	African Sanga	Bos taurus/Bos indicus hybrid	Benin	1992	Previously part of microsatellite study	Modern	3.39	71170452	71053896	70983542	9365259066	9360355597	9192587	11514.7	199	14.7595	236968	45.09	0.82	41.91	3.3943	99.8362
Boran	BORA	BORA	BORA02	AFI	African Indicine	Bos indicus	Kenya	2000	Previously part of microsatellite study	Modern	3.38	74115054	74000551	73927038	9339389591	9333732981	7465167	13786.9	160	14.5827	40784	45.14	0.87	42.66	3.3849	99.8455
NDama_Guinea_1990s	NDAG	NDAG	NDAG36	AFT	African taurine	Bos taurus	Guinea	1992	Previously part of microsatellite study	Modern	3.38	75636302	75539924	75500178	9339080864	9335415744	9500821	12894.7	158	14.764	103401	45.89	0.62	41.88	3.3848	99.8726
NDama_Senegal_1990s	NDST	NDST	NDST11	AFT	African taurine	Bos taurus	Senegal	1992	Previously part of microsatellite study	Modern	3.38	79159630	79019098	78947680	9325790014	9322037629	7772680	16496.5	139	14.5188	40094	45.87	0.67	41.98	3.3799	99.8225
Kapsiki	KAPS	KAPS	KAPS43	AFT	African taurine	Bos taurus	Cameroon	1992	Previously part of microsatellite study	Modern	3.37	75243812	75131823	75072960	9287368257	9282237508	11776730	15819	162	14.5799	20557	45.7	0.78	38.71	3.366	99.8512
Kuri	KRIT	KURI	KURI28	AFT	African taurine	Bos taurus	Chad	1992	Previously part of microsatellite study	Modern	3.37	74307398	74190192	74130996	9293518219	9288540769	10515975	11779.4	167	14.7593	241563	45.24	0.77	41.19	3.3682	99.8423
Lagune	LAGU	LAGU	LAGU39	AFT	African taurine	Bos taurus	Benin	1992	Previously part of microsatellite study	Modern	3.37	70877698	70755807	70680574	9285217782	9281276886	9575263	11545.6	202	14.9232	19719	44.85	0.7	42.11	3.3652	99.828
Namchi	NAMC	NAMC	NAMC44	AFT	African taurine	Bos taurus	Cameroon	1992	Previously part of microsatellite study	Modern	3.37	76841072	76731906	76656808	9292337547	9288319305	9985865	15705.8	149	14.3787	59111	45.98	0.71	41.19	3.3678	99.8579
Kuri	KRIT	KURI	KURI41	AFT	African taurine	Bos taurus	Chad	1992	Previously part of microsatellite study	Modern	3.36	72644370	72537325	72472996	9276718475	9271681621	10162740	15596.6	180	14.586	240050	46.16	0.84	40.3	3.3622	99.8526
Sokoto_Gudali	SOKO	SOKO	SOKO36	AFS	African Sanga	Bos indicus	Nigeria	1992	Previously part of microsatellite study	Modern	3.35	72826794	72669063	72558470	9237255436	9231725059	8410044	11902.2	174	14.6517	57712	44.98	0.92	41.98	3.3479	99.7834
Lagune	LAGU	LAGU	LAGU31	AFT	African taurine	Bos taurus	Benin	1992	Previously part of microsatellite study	Modern	3.34	71458138	71358274	71299770	9225091800	9221445659	10105604	10186.9	182	14.7574	20293	45.21	0.59	42.96	3.3434	99.8602
NDama_Nigeria_1990s	NDNT	NDNT	NDNT07	AFT	African taurine	Bos taurus	Nigeria	1992	Previously part of microsatellite study	Modern	3.34	74995084	74890708	74822632	9227727337	9223718112	7572560	11929.9	156	14.6322	39335	46.18	0.69	42.13	3.3444	99.8608
White_Fulani	WHIT	WHIT	WHIT11	AFS	African Sanga	Bos indicus	Nigeria	1992	Previously part of microsatellite study	Modern	3.34	73394800	73240744	73132382	9226259081	9220648001	8465493	12527	173	14.5982	58787	44.91	0.93	41.67	3.3439	99.7901
Butana	BUTA	BUTA	BUTA31	AFI	African Indicine	Bos indicus	Sudan	1992	Previously part of microsatellite study	Modern	3.31	74806544	74680448	74614876	9123911751	9118344111	7994045	15175.2	161	14.5869	39247	46.55	0.9	42.12	3.3068	99.8314
Butana	BUTA	BUTA	BUTA40	AFI	African Indicine	Bos indicus	Sudan	1992	Previously part of microsatellite study	Modern	3.31	77351584	77256617	77200894	9134418954	9129076716	7103893	16594.5	143	14.3778	40033	45.43	0.78	42.76	3.3106	99.8772
White_Fulani	WHIT	WHIT	WHIT26	AFS	African Sanga	Bos indicus	Nigeria	1992	Previously part of microsatellite study	Modern	3.31	70584916	70404804	70258954	9141553498	9135970270	8262859	11508	187	14.6874	57846	44.98	0.99	41.51	3.3132	99.7448
Kuri	KRIT	KURI	KURI49	AFT	African taurine	Bos taurus	Chad	1992	Previously part of microsatellite study	Modern	3.3	75005600	74819433	74770482	9118823658	9113987279	10804993	13288.1	153	15.1326	236330	45.58	0.75	41.54	3.3049	99.7518
Lagune	LAGU	LAGU	LAGU38	AFT	African taurine	Bos taurus	Benin	1992	Previously part of microsatellite study	Modern	3.3	69539710	69422942	69361854	9110497021	9106546912	9091219	11163.4	195	14.9748	19962	44.97	0.67	41.98	3.3019	99.8321
Kapsiki	KAPS	KAPS	KAPS22	AFT	African taurine	Bos taurus	Cameroon	1992	Previously part of microsatellite study	Modern	3.29	71457680	71356062	71307778	9064006179	9058471621	9611018	10723	166	14.8379	19289	45.24	0.83	39.44	3.2851	99.8578
Kenana	KNAT	KENA	KENA05	AFI	African Indicine	Bos indicus	South Sudan	1990	Previously part of microsatellite study	Modern	3.28	80671114	80575219	80527180	9056133738	9051065152	9828865	21763.8	130	14.0723	41207	46.1	0.73	42.12	3.2822	99.8811
Lagune	LAGU	LAGU	LAGU34	AFT	African taurine	Bos taurus	Benin	1992	Previously part of microsatellite study	Modern	3.28	70356140	70259980	70200770	9048417082	9044495641	9709981	12508.9	186	14.8259	19579	45.68	0.66	41.42	3.2794	99.8633
Butana	BUTA	BUTA	BUTA37	AFI	African Indicine	Bos indicus	Sudan	1992	Previously part of microsatellite study	Modern	3.27	76618548	76512116	76453890	9026420623	9021056207	7418833	16912.7	144	14.3704	39802	45.8	0.81	42.12	3.2714	99.8611
NDama_Senegal_1990s	NDST	NDST	NDST03	AFT	African taurine	Bos taurus	Senegal	1992	Previously part of microsatellite study	Modern	3.27	75734068	75628158	75568588	9016120506	9012692996	7244194	15481.1	142	14.3081	38975	46.08	0.64	42.22	3.2677	99.8602
Muturu_Nigeria_1990s	MUTT	MUTT	MUTT23	AFT	African taurine	Bos taurus	Nigeria	1992	Previously part of microsatellite study	Modern	3.26	67505212	67408610	67353120	9000277320	8996647173	7766441	7004.83	186	15.0189	100579	45.29	0.69	42.77	3.262	99.8569
Lagune	LAGU	LAGU	LAGU23	AFT	African taurine	Bos taurus	Benin	1992	Previously part of microsatellite study	Modern	3.25	69687584	69548431	69463610	8954236373	8950223280	9216199	11533.9	184	14.8969	19785	44.99	0.67	42.9	3.2453	99.8003
Namchi	NAMC	NAMC	NAMC22	AFT	African taurine	Bos taurus	Cameroon	1992	Previously part of microsatellite study	Modern	3.25	83578800	83504871	83464728	8956482539	8952119761	13891532	25157.6	118	13.8702	57166	46.77	0.69	39.34	3.2461	99.9115
Mbororo	MBOR	MBOR	MBOR32	AFS	African Sanga	Bos taurus/Bos indicus hybrid	Nigeria	1992	Previously part of microsatellite study	Modern	3.24	76935778	76847748	76794344	8944215296	8939387845	9211246	19883.4	143	14.0395	36220	49.62	0.91	38.84	3.2417	99.8856
NDama_Gambia_1990s	NDGT	NDGM	NDGM18	AFT	African taurine	Bos taurus	Gambia	1992	Previously part of microsatellite study	Modern	3.24	72257920	72174326	72134476	8950605245	8946748424	8095703	14871.2	166	14.607	37971	46.2	0.71	41.65	3.244	99.8843
NDama_Guinea_1990s	NDAG	NDAG	NDAG43	AFT	African taurine	Bos taurus	Guinea	1992	Previously part of microsatellite study	Modern	3.24	73711336	73599715	73535096	8928186907	8924818208	9168601	15451.5	155	14.5425	100013	45.79	0.64	42.61	3.2358	99.8486
NDama_Guinea_1990s	NDAG	NDAG	NDAG12	AFT	African taurine	Bos taurus	Guinea	1992	Previously part of microsatellite study	Modern	3.24	71084432	70886682	70826816	8938191323	8934643830	8863590	13241.5	179	15.27	100205	45.59	0.67	41.82	3.2395	99.7218
Lagune	LAGU	LAGU	LAGU07	AFT	African taurine	Bos taurus	Benin	1992	Previously part of microsatellite study	Modern	3.23	69243644	69115840	69045762	8913709911	8910171692	9652933	11594.5	187	14.7791	19685	45.04	0.61	43.26	3.2306	99.8154
Lagune	LAGU	LAGU	LAGU13	AFT	African taurine	Bos taurus	Benin	1992	Previously part of microsatellite study	Modern	3.21	71230216	71146287	71095956	8858589981	8855208988	9823086	12623.5	161	14.6202	19858	45.15	0.54	42.71	3.2106	99.8822
East_African_Short_Zebu	EASZ	EASZ	EASZ215	AZE	African Indicine Composite	Bos indicus	Kenya	Recent	Olivier Hanotte / Abdulfatai Tijjani	Modern	3.21	62198640	61937582	61882976	8857083207	8851542355	18881788	9674.64	227	15.4053	314495	46.88	0.88	41.41	3.2101	99.5803
Lagune	LAGU	LAGU	LAGU40	AFT	African taurine	Bos taurus	Benin	1992	Previously part of microsatellite study	Modern	3.2	66770770	66667704	66610648	8834376627	8830495839	8440687	10687.4	205	14.9319	18748	44.99	0.7	41.97	3.2018	99.8456
NDama_Nigeria_1990s	NDNT	NDNT	NDNT04	AFT	African taurine	Bos taurus	Nigeria	1992	Previously part of microsatellite study	Modern	3.2	71700946	71558132	71468198	8823744355	8820032581	7192308	12825.7	164	14.547	38996	46.23	0.72	41.68	3.198	99.8008
Kenana	KNAT	KENA	KENA22	AFI	African Indicine	Bos indicus	South Sudan	1990	Previously part of microsatellite study	Modern	3.19	72215240	72073618	72000460	8801241267	8795913264	6515525	16350.5	164	14.5458	46775	45.89	0.91	42.14	3.1898	99.8039
Lagune	LAGU	LAGU	LAGU36	AFT	African taurine	Bos taurus	Benin	1992	Previously part of microsatellite study	Modern	3.19	68570886	68457409	68394908	8803450466	8799571224	8666961	13406.3	188	14.9243	19107	45.29	0.68	42.25	3.1906	99.8345
Muturu_Nigeria_1990s	MUTT	MUTT	MUTT20	AFT	African taurine	Bos taurus	Nigeria	1992	Previously part of microsatellite study	Modern	3.19	72264394	72175000	72119830	8794393285	8791021207	9332043	13535.6	158	14.543	99238	46.19	0.6	42.19	3.1874	99.8763
NDama_Guinea_1990s	NDAG	NDAG	NDAG19	AFT	African taurine	Bos taurus	Guinea	1992	Previously part of microsatellite study	Modern	3.19	69337068	69226577	69151632	8788367468	8784987272	8889918	10437.2	179	14.6966	98413	45.69	0.69	42.49	3.1852	99.8406
Borgou	BORG	BORG	BORG45	AFS	African Sanga	Bos taurus/Bos indicus hybrid	Benin	1992	Previously part of microsatellite study	Modern	3.18	65869028	65746461	65667216	8769725815	8765293026	9252753	11437.4	208	15.0115	222116	44.67	0.8	42.6	3.1784	99.8139
Kapsiki	KAPS	KAPS	KAPS21	AFT	African taurine	Bos taurus	Cameroon	1992	Previously part of microsatellite study	Modern	3.18	70848636	70744666	70692496	8779732335	8774971752	10407215	14628	161	14.6189	18978	45.26	0.74	39.27	3.182	99.8533
Kuri	KRIT	KURI	KURI45	AFT	African taurine	Bos taurus	Chad	1992	Previously part of microsatellite study	Modern	3.18	68652144	68578274	68529996	8775447828	8770414353	9715641	15220.8	182	14.5578	229591	46.06	0.83	40.05	3.1805	99.8924
NDama_Senegal_1990s	NDST	NDST	NDST22	AFT	African taurine	Bos taurus	Senegal	1992	Previously part of microsatellite study	Modern	3.18	77744712	77633637	77566514	8771040998	8767642585	8582214	16853.9	126	14.1724	37074	45.15	0.59	43.34	3.1789	99.8571
Kenana	KNAT	KENA	KENA31	AFI	African Indicine	Bos indicus	South Sudan	1990	Previously part of microsatellite study	Modern	3.17	73680488	73535629	73449494	8759573985	8754424411	8077563	17539.2	148	14.4699	39543	45.92	0.84	42.06	3.1747	99.8034
Butana	BUTA	BUTA	BUTA35	AFI	African Indicine	Bos indicus	Sudan	1992	Previously part of microsatellite study	Modern	3.16	73500212	73373901	73303616	8721471541	8716243652	6473696	19352.3	151	14.3332	38862	46	0.85	42.18	3.1609	99.8281
East_African_Short_Zebu	EASZ	EASZ	EASZ099	AZE	African Indicine Composite	Bos indicus	Kenya	Recent	Olivier Hanotte / Abdulfatai Tijjani	Modern	3.16	60355234	60128982	60050224	8714365111	8710290828	16090621	9171.17	260	15.4151	295996	45.71	0.78	43.05	3.1583	99.6251
NDama_Gambia_1990s	NDGT	NDGM	NDGM20	AFT	African taurine	Bos taurus	Gambia	1992	Previously part of microsatellite study	Modern	3.15	72166336	72091129	72053686	8681268314	8677667314	7983143	16279.7	149	14.5327	38005	46.09	0.64	42.46	3.1464	99.8958
White_Fulani	WHIT	WHIT	WHIT09	AFS	African Sanga	Bos indicus	Nigeria	1992	Previously part of microsatellite study	Modern	3.14	68697844	68618472	68574592	8654673571	8649607946	7397900	12024.4	171	14.5089	50725	45.45	0.94	41.35	3.1367	99.8845
Kenana	KNAT	KENA	KENA14	AFI	African Indicine	Bos indicus	South Sudan	1990	Previously part of microsatellite study	Modern	3.12	75456934	75349743	75292508	8609541097	8604607124	8189246	21371.6	136	14.2994	38437	46.32	0.75	42.26	3.1204	99.8579
NDama_Nigeria_1990s	NDNT	NDNT	NDNT14	AFT	African taurine	Bos taurus	Nigeria	1992	Previously part of microsatellite study	Modern	3.12	73095870	73009952	72956460	8619584543	8616184409	7457296	16401.8	147	14.4248	38591	45.91	0.59	42.95	3.124	99.8825
East_African_Short_Zebu	EASZ	EASZ	EASZ017	AZE	African Indicine Composite	Bos indicus	Kenya	Recent	Olivier Hanotte / Abdulfatai Tijjani	Modern	3.12	60049424	59844804	59780820	8600924127	8597614884	14946814	6208.54	238	15.6212	289839	46.47	0.59	43.72	3.1172	99.6592
Kenana	KNAT	KENA	KENA17	AFI	African Indicine	Bos indicus	South Sudan	1990	Previously part of microsatellite study	Modern	3.11	78781664	78679134	78619146	8569891909	8565175070	9611575	22882.7	121	14.0071	39003	46.67	0.75	41.04	3.106	99.8699
Lagune	LAGU	LAGU	LAGU16	AFT	African taurine	Bos taurus	Benin	1992	Previously part of microsatellite study	Modern	3.11	65265040	65170448	65116834	8572966694	8569571635	8552368	9734.14	197	14.7764	18821	44.64	0.59	43.45	3.1071	99.8551
Kenana	KNAT	KENA	KENA21	AFI	African Indicine	Bos indicus	South Sudan	1990	Previously part of microsatellite study	Modern	3.1	70511808	70390499	70340318	8543521963	8538459355	7323727	14967	149	14.575	38136	45.6	0.79	42.31	3.0964	99.828
Nguni	NGUN	NGUN	NGUN47	AFS	African Sanga	Bos taurus/Bos indicus hybrid	South Africa	2022	University of Pretoria	Modern	3.1	84130982	84032941	83985202	8552681022	8549130123	14045451	39451.2	113	13.8341	105872	46.9	0.66	42.2	3.0997	99.8835
Kapsiki	KAPS	KAPS	KAPS11	AFT	African taurine	Bos taurus	Cameroon	1992	Previously part of microsatellite study	Modern	3.09	72350600	72251664	72201414	8522651396	8518111791	10775872	15773.9	142	14.4234	18010	46.06	0.76	38.26	3.0889	99.8633
Kapsiki	KAPS	KAPS	KAPS47	AFT	African taurine	Bos taurus	Cameroon	1992	Previously part of microsatellite study	Modern	3.09	70553840	70474993	70433700	8534973553	8530187119	11830775	14626.1	150	14.4573	18665	46.04	0.75	37.78	3.0933	99.8882
Kapsiki	KAPS	KAPS	KAPS48	AFT	African taurine	Bos taurus	Cameroon	1992	Previously part of microsatellite study	Modern	3.07	74892378	74786693	74732878	8471711633	8467115264	12029834	23326.3	129	14.3206	18827	46.3	0.7	38.97	3.0704	99.8589
White_Fulani	WHIT	WHIT	WHIT29	AFS	African Sanga	Bos indicus	Nigeria	1992	Previously part of microsatellite study	Modern	3.07	67544390	67413715	67316310	8479439043	8474400156	7994540	12264.3	168	14.4823	54040	45.22	0.92	42.08	3.0732	99.8065
Kapsiki	KAPS	KAPS	KAPS16	AFT	African taurine	Bos taurus	Cameroon	1992	Previously part of microsatellite study	Modern	3.06	68031376	67953264	67907222	8430454556	8425261314	9014402	13193.8	166	14.5582	17467	45.72	0.89	38.41	3.0554	99.8852
Sokoto_Gudali	SOKO	SOKO	SOKO15	AFS	African Sanga	Bos indicus	Nigeria	1992	Previously part of microsatellite study	Modern	3.06	64969288	64875852	64823766	8454960337	8449641809	8454444	10287.1	191	14.6631	93704	45	0.94	40.9	3.0643	99.8562
Mbororo	MBOR	MBOR	MBOR24	AFS	African Sanga	Bos taurus/Bos indicus hybrid	Nigeria	1992	Previously part of microsatellite study	Modern	3.05	68282214	68188229	68124014	8408832377	8403745404	6854748	12841.3	155	14.3732	34225	48.05	1.04	38.62	3.0476	99.8624
Mbororo	MBOR	MBOR	MBOR27	AFS	African Sanga	Bos taurus/Bos indicus hybrid	Nigeria	1992	Previously part of microsatellite study	Modern	3.05	69415266	69304203	69230776	8403169999	8398486281	8190035	16774.5	153	14.1279	34091	49.87	1.06	38.23	3.0456	99.84
White_Fulani	WHIT	WHIT	WHIT06	AFS	African Sanga	Bos indicus	Nigeria	1992	Previously part of microsatellite study	Modern	3.04	64511370	64344981	64215992	8378838355	8373711709	6703240	10836.3	186	14.6504	51960	44.54	1.01	41.76	3.0367	99.7421
Lagune	LAGU	LAGU	LAGU41	AFT	African taurine	Bos taurus	Benin	1992	Previously part of microsatellite study	Modern	3.03	63817364	63690007	63630390	8351049794	8347569119	7810305	11554.1	199	14.9236	17845	45.26	0.66	42.24	3.0267	99.8004
NDama_Senegal_1990s	NDST	NDST	NDST06	AFT	African taurine	Bos taurus	Senegal	1992	Previously part of microsatellite study	Modern	3.03	71594758	71512818	71480350	8361597345	8358237069	6946702	17806	137	14.5568	34110	44.95	0.62	42.41	3.0305	99.8856
Zebu_Gobra	ZEBG	ZEBG	ZEBG47	AFS	African Sanga	Bos indicus	Senegal	1992	Previously part of microsatellite study	Modern	3.03	67110544	67016382	66954808	8351400435	8346647682	6919644	15130.8	169	14.4917	36334	45.38	0.88	41.35	3.0268	99.8597
Namchi	NAMC	NAMC	NAMC13	AFT	African taurine	Bos taurus	Cameroon	1992	Previously part of microsatellite study	Modern	3.02	72105714	71990500	71925454	8338011709	8334097276	10942647	18573.1	139	14.343	53266	46.39	0.71	39.62	3.0219	99.8402
White_Fulani	WHIT	WHIT	WHIT16	AFS	African Sanga	Bos indicus	Nigeria	1992	Previously part of microsatellite study	Modern	2.97	61722526	61595714	61515410	8190429383	8185481403	6154112	10127.7	190	14.8619	51307	44.62	0.89	41.75	2.9685	99.7945
East_African_Short_Zebu	EASZ	EASZ	EASZ171	AZE	African Indicine Composite	Bos indicus	Kenya	Recent	Olivier Hanotte / Abdulfatai Tijjani	Modern	2.96	56997846	56781113	56725122	8157560889	8153954007	17271318	8705.74	242	15.4613	287251	46.99	0.67	42.4	2.9565	99.6198
Lagune	LAGU	LAGU	LAGU14	AFT	African taurine	Bos taurus	Benin	1992	Previously part of microsatellite study	Modern	2.96	63848862	63760395	63718502	8163847889	8160685527	8571225	11361.9	181	14.7535	17427	45.24	0.58	42.67	2.9588	99.8614
NDama_Senegal_1990s	NDST	NDST	NDST07	AFT	African taurine	Bos taurus	Senegal	1992	Previously part of microsatellite study	Modern	2.96	68693806	68581027	68531418	8175813099	8172555870	6915962	16986.6	141	14.4022	33125	46.89	0.66	40.89	2.9632	99.8358
Kenana	KNAT	KENA	KENA36	AFI	African Indicine	Bos indicus	South Sudan	1990	Previously part of microsatellite study	Modern	2.95	73811532	73677356	73625480	8133173885	8128656238	8683601	21855.8	124	14.1873	36747	46.78	0.75	41.64	2.9477	99.8182
Sokoto_Gudali	SOKO	SOKO	SOKO26	AFS	African Sanga	Bos indicus	Nigeria	1992	Previously part of microsatellite study	Modern	2.95	63161510	63035789	62957092	8149311364	8144305350	7317110	10726.8	179	14.733	52216	44.88	0.91	42.01	2.9536	99.801
Borgou	BORG	BORG	BORG31	AFS	African Sanga	Bos taurus/Bos indicus hybrid	Benin	1992	Previously part of microsatellite study	Modern	2.94	61268208	61154699	61074448	8115847414	8111668937	9674844	8746.63	199	14.7532	205645	44.67	0.8	42.06	2.9414	99.8147
Sokoto_Gudali	SOKO	SOKO	SOKO10	AFS	African Sanga	Bos indicus	Nigeria	1992	Previously part of microsatellite study	Modern	2.93	63371218	63247556	63161968	8072610936	8067595784	7695996	14035.8	188	14.605	92471	45.33	0.96	40.69	2.9258	99.8049
Butana	BUTA	BUTA	BUTA39	AFI	African Indicine	Bos indicus	Sudan	1992	Previously part of microsatellite study	Modern	2.92	67703668	67604130	67547456	8054109169	8049296791	6621969	16911.7	150	14.3391	35754	46.05	0.84	41.83	2.9191	99.853
Lagune	LAGU	LAGU	LAGU22	AFT	African taurine	Bos taurus	Benin	1992	Previously part of microsatellite study	Modern	2.92	62562402	62465017	62420740	8058059371	8054889353	8439197	10265.2	182	14.9477	16608	44.94	0.6	43.02	2.9205	99.8443
NDama_Guinea_1990s	NDAG	NDAG	NDAG53	AFT	African taurine	Bos taurus	Guinea	1992	Previously part of microsatellite study	Modern	2.92	63795152	63705739	63659282	8057023438	8053937397	8427829	11757.1	171	14.759	91942	45.52	0.63	42.69	2.9201	99.8598
Borgou	BORG	BORG	BORG33	AFS	African Sanga	Bos taurus/Bos indicus hybrid	Benin	1992	Previously part of microsatellite study	Modern	2.91	61222516	61106973	61025058	8021489189	8017344661	8622205	9619.35	195	14.8747	205368	44.7	0.8	41.78	2.9072	99.8113
Borgou	BORG	BORG	BORG43	AFS	African Sanga	Bos taurus/Bos indicus hybrid	Benin	1992	Previously part of microsatellite study	Modern	2.91	61643972	61549322	61483928	8040900459	8037045785	8151687	10912	192	14.813	207114	45.27	0.77	42.07	2.9143	99.8465
NDama_Nigeria_1990s	NDNT	NDNT	NDNT12	AFT	African taurine	Bos taurus	Nigeria	1992	Previously part of microsatellite study	Modern	2.91	67588926	67512239	67471156	8023216916	8020246973	7062296	15020.6	149	14.5147	35091	46.08	0.59	42.87	2.9079	99.8865
Zebu_Gobra	ZEBG	ZEBG	ZEBG32	AFS	African Sanga	Bos indicus	Senegal	1992	Previously part of microsatellite study	Modern	2.91	63260068	63166118	63101506	8040758934	8036137331	7467675	11062.8	179	14.6046	36454	45.2	0.87	40.98	2.9142	99.8515
Lagune	LAGU	LAGU	LAGU27	AFT	African taurine	Bos taurus	Benin	1992	Previously part of microsatellite study	Modern	2.9	60960392	60887184	60843850	7994662357	7990986314	7431681	10038.3	198	14.9188	15782	45.21	0.72	41.9	2.8975	99.8799
Kapsiki	KAPS	KAPS	KAPS29	AFT	African taurine	Bos taurus	Cameroon	1992	Previously part of microsatellite study	Modern	2.88	66058286	65980513	65932984	7933360861	7928945452	10476725	16286.4	151	14.4677	17971	45.93	0.8	39.24	2.8753	99.8823
Lagune	LAGU	LAGU	LAGU35	AFT	African taurine	Bos taurus	Benin	1992	Previously part of microsatellite study	Modern	2.88	62124540	62028973	61977524	7955881490	7952700718	8540563	12748.1	179	14.8236	17619	45.28	0.61	42.6	2.8834	99.8462
NDama_Guinea_1990s	NDAG	NDAG	NDAG30	AFT	African taurine	Bos taurus	Guinea	1992	Previously part of microsatellite study	Modern	2.88	64552766	64456088	64413424	7957993927	7954896541	8975291	14360	166	14.8278	88142	46.03	0.64	41.84	2.8842	99.8502
Sokoto_Gudali	SOKO	SOKO	SOKO21	AFS	African Sanga	Bos indicus	Nigeria	1992	Previously part of microsatellite study	Modern	2.88	61518064	61436777	61384058	7944612045	7939530498	7339141	11324.1	192	14.7181	88210	44.85	0.92	41.08	2.8794	99.8679
Butana	BUTA	BUTA	BUTA29	AFI	African Indicine	Bos indicus	Sudan	1992	Previously part of microsatellite study	Modern	2.87	65568504	65440053	65367904	7911941001	7907217138	7049187	16218.4	158	14.4824	34464	46.88	0.89	42.35	2.8675	99.8041
Kuri	KRIT	KURI	KURI18	AFT	African taurine	Bos taurus	Chad	1992	Previously part of microsatellite study	Modern	2.86	63175010	63119876	63091846	7886728115	7882421471	8702729	11065.8	162	14.675	200404	45.02	0.79	41.51	2.8584	99.9127
Kenana	KNAT	KENA	KENA06	AFI	African Indicine	Bos indicus	South Sudan	1990	Previously part of microsatellite study	Modern	2.85	63124218	63001660	62931148	7849832465	7845057869	7083496	17086.8	172	14.4762	34891	47.18	0.9	41.92	2.845	99.8058
Lagune	LAGU	LAGU	LAGU29	AFT	African taurine	Bos taurus	Benin	1992	Previously part of microsatellite study	Modern	2.85	61247048	61164694	61120386	7876958761	7873804278	8937659	9979.4	180	14.8166	17063	45.21	0.58	42.26	2.8548	99.8655
Namchi	NAMC	NAMC	NAMC32	AFT	African taurine	Bos taurus	Cameroon	1992	Previously part of microsatellite study	Modern	2.85	65276042	65155997	65074448	7868959082	7865062952	9495700	16073.5	149	14.3699	49057	45.59	0.79	39.81	2.8519	99.8161
Kapsiki	KAPS	KAPS	KAPS31	AFT	African taurine	Bos taurus	Cameroon	1992	Previously part of microsatellite study	Modern	2.84	66537588	66430598	66385230	7846959307	7842719807	9825051	17433.9	142	14.6545	16915	45.86	0.72	38.76	2.844	99.8392
Kenana	KNAT	KENA	KENA34	AFI	African Indicine	Bos indicus	South Sudan	1990	Previously part of microsatellite study	Modern	2.84	67720738	67616820	67575172	7824521514	7819997335	6556764	18158.2	136	14.4303	36526	45.6	0.77	41.97	2.8358	99.8465
Lagune	LAGU	LAGU	LAGU11	AFT	African taurine	Bos taurus	Benin	1992	Previously part of microsatellite study	Modern	2.84	60962426	60872561	60821222	7844613430	7841556582	7921213	11376.7	183	14.764	17467	45.07	0.6	42.95	2.8431	99.8526
Sokoto_Gudali	SOKO	SOKO	SOKO42	AFS	African Sanga	Bos indicus	Nigeria	1992	Previously part of microsatellite study	Modern	2.84	59799792	59680577	59597936	7849218332	7844430941	6145468	10263	193	14.7471	48839	44.78	0.92	41.88	2.8448	99.8006
Sokoto_Gudali	SOKO	SOKO	SOKO23	AFS	African Sanga	Bos indicus	Nigeria	1992	Previously part of microsatellite study	Modern	2.84	60632420	60548553	60505154	7838934718	7834222570	6796097	10433.8	183	14.6571	45190	44.92	0.98	41.48	2.8411	99.8617
Kuri	KRIT	KURI	KURI32	AFT	African taurine	Bos taurus	Chad	1992	Previously part of microsatellite study	Modern	2.83	61915932	61838035	61802490	7797830303	7793548487	8078245	16544	172	14.5465	197701	46.42	0.82	40.21	2.8262	99.8742
Sokoto_Gudali	SOKO	SOKO	SOKO27	AFS	African Sanga	Bos indicus	Nigeria	1992	Previously part of microsatellite study	Modern	2.83	60619336	60510400	60426962	7799963769	7795182762	6046551	11681	182	14.6511	50052	44.83	0.9	41.84	2.8269	99.8203
Lagune	LAGU	LAGU	LAGU20	AFT	African taurine	Bos taurus	Benin	1992	Previously part of microsatellite study	Modern	2.82	62921060	62656819	62589520	7772653949	7769709146	8210802	13397.1	161	14.9367	11786	45.41	0.73	42.02	2.817	99.58
Tuli	TULI	TULI	TULI43	SAC	South African Composite	Bos taurus/Bos indicus hybrid	South Africa	2022	University of Pretoria	Modern	2.82	75032712	74793867	74750096	7780715860	7777608307	11369339	32116.5	114	14.7444	97399	47.24	0.62	41.58	2.82	99.6817
Borgou	BORG	BORG	BORG17	AFS	African Sanga	Bos taurus/Bos indicus hybrid	Benin	1992	Previously part of microsatellite study	Modern	2.81	57944866	57863767	57815676	7764469638	7760473361	8259173	9053.83	220	15.0053	197948	45.04	0.81	41.56	2.8141	99.86
Lagune	LAGU	LAGU	LAGU06	AFT	African taurine	Bos taurus	Benin	1992	Previously part of microsatellite study	Modern	2.81	61913644	61241390	61185016	7749536282	7746497805	8639232	11935.2	175	15.5375	17266	45.16	0.59	43.14	2.8087	98.9142
Tuli	TULI	TULI	TULI40	SAC	South African Composite	Bos taurus/Bos indicus hybrid	South Africa	2022	University of Pretoria	Modern	2.81	65915132	65810178	65780824	7749500180	7746158486	8784376	14852.2	135	14.5962	96696	46.79	0.67	41.31	2.8087	99.8408
Kapsiki	KAPS	KAPS	KAPS20	AFT	African taurine	Bos taurus	Cameroon	1992	Previously part of microsatellite study	Modern	2.8	64195568	64110606	64063014	7727711167	7723657891	9115524	16695.7	151	14.3894	16993	45.46	0.69	39.85	2.8008	99.8677
Kuri	KRIT	KURI	KURI25	AFT	African taurine	Bos taurus	Chad	1992	Previously part of microsatellite study	Modern	2.79	62886252	62826120	62794682	7710442633	7706326165	8626808	13829.8	159	14.4512	195363	45.86	0.73	41.02	2.7945	99.9044
NDama_Guinea_1990s	NDAG	NDAG	NDAG46	AFT	African taurine	Bos taurus	Guinea	1992	Previously part of microsatellite study	Modern	2.79	62812960	62729701	62686260	7690717878	7687753443	7080002	14463	158	14.5661	85334	46.02	0.63	42.2	2.7873	99.8674
NDama_Guinea_1990s	NDAG	NDAG	NDAG58	AFT	African taurine	Bos taurus	Guinea	1992	Previously part of microsatellite study	Modern	2.79	60238844	60041712	59887382	7698274641	7695329100	8217665	11392.7	186	14.7599	86112	44.93	0.74	43.17	2.7901	99.6727
East_African_Short_Zebu	EASZ	EASZ	EASZ115	AZE	African Indicine Composite	Bos indicus	Kenya	Recent	Olivier Hanotte / Abdulfatai Tijjani	Modern	2.78	53345162	53163290	53119126	7681171807	7676875987	14073364	7786.72	250	15.2614	259944	47.35	0.81	41.53	2.7839	99.6591
Kapsiki	KAPS	KAPS	KAPS30	AFT	African taurine	Bos taurus	Cameroon	1992	Previously part of microsatellite study	Modern	2.78	62300824	62220380	62179038	7669380345	7665513906	9266877	15984.8	160	14.5253	16362	46.03	0.7	40.01	2.7796	99.8709
NDama_Guinea_1990s	NDAG	NDAG	NDAG41	AFT	African taurine	Bos taurus	Guinea	1992	Previously part of microsatellite study	Modern	2.78	61312028	61246128	61210772	7663969932	7661045916	7461721	12368.5	166	14.578	82669	45.69	0.7	42.36	2.7777	99.8925
Zebu_Gobra	ZEBG	ZEBG	ZEBG08	AFS	African Sanga	Bos indicus	Senegal	1992	Previously part of microsatellite study	Modern	2.78	62381708	62322402	62286580	7666515366	7662229563	6448849	15088.6	159	14.4431	33975	45.58	0.8	41.6	2.7786	99.9049
Nguni	NGUN	NGUN	NGUN44	AFS	African Sanga	Bos taurus/Bos indicus hybrid	South Africa	2022	University of Pretoria	Modern	2.78	76440748	76344011	76314398	7671843397	7668822798	10148735	29111.6	105	13.8995	92327	46.82	0.66	42.08	2.7805	99.8734
Muturu_Nigeria_1990s	MUTT	MUTT	MUTT01	AFT	African taurine	Bos taurus	Nigeria	1992	Previously part of microsatellite study	Modern	2.77	61462270	61397648	61367506	7645743821	7642622495	8104950	13406.1	166	14.6235	83751	45.99	0.71	41.22	2.771	99.8949
NDama_Guinea_1990s	NDAG	NDAG	NDAG50	AFT	African taurine	Bos taurus	Guinea	1992	Previously part of microsatellite study	Modern	2.77	64516354	64407999	64347570	7646788534	7643975414	8131265	18089	149	14.3933	85694	45.94	0.63	42.66	2.7714	99.8321
Kenana	KNAT	KENA	KENA16	AFI	African Indicine	Bos indicus	South Sudan	1990	Previously part of microsatellite study	Modern	2.76	63806290	63711680	63652284	7605347987	7600710733	6656433	18780.7	152	14.41	34722	45.91	0.84	41.88	2.7564	99.8517
Kuri	KRIT	KURI	KURI39	AFT	African taurine	Bos taurus	Chad	1992	Previously part of microsatellite study	Modern	2.76	59019306	58936759	58885086	7602316500	7597839802	8788313	21962.7	184	14.1714	198044	47.37	0.96	37.77	2.7553	99.8601
Butana	BUTA	BUTA	BUTA28	AFI	African Indicine	Bos indicus	Sudan	1992	Previously part of microsatellite study	Modern	2.75	63515240	63387730	63328096	7590504872	7586050311	5690618	15938.9	148	14.4477	34589	45.56	0.8	42.39	2.751	99.7992
Kapsiki	KAPS	KAPS	KAPS15	AFT	African taurine	Bos taurus	Cameroon	1992	Previously part of microsatellite study	Modern	2.75	62206924	62122705	62084098	7583818239	7579759120	9135115	15319.8	155	14.5249	16276	46.08	0.76	38.42	2.7486	99.8646
Kuri	KRIT	KURI	KURI20	AFT	African taurine	Bos taurus	Chad	1992	Previously part of microsatellite study	Modern	2.75	60587400	60509678	60464676	7579271126	7575240018	8101920	11762.5	169	14.7041	196236	44.94	0.75	41.57	2.747	99.8717
Namchi	NAMC	NAMC	NAMC49	AFT	African taurine	Bos taurus	Cameroon	1992	Previously part of microsatellite study	Modern	2.75	61774122	61678354	61612212	7579297087	7575902827	7644779	12331.2	156	14.5331	47943	45.28	0.71	41.07	2.747	99.845
Kenana	KNAT	KENA	KENA13	AFI	African Indicine	Bos indicus	South Sudan	1990	Previously part of microsatellite study	Modern	2.74	63750334	63670590	63641258	7556506312	7552086005	6993595	19307.7	150	14.3716	24773	46.49	1	41.58	2.7387	99.8749
Muturu_Nigeria_1990s	MUTT	MUTT	MUTT19	AFT	African taurine	Bos taurus	Nigeria	1992	Previously part of microsatellite study	Modern	2.74	61423550	61353394	61315682	7551929359	7549038133	8386680	12528.9	160	14.6361	83549	45.8	0.64	42.37	2.737	99.8858
NDama_Gambia_1990s	NDGT	NDGM	NDGM09	AFT	African taurine	Bos taurus	Gambia	1992	Previously part of microsatellite study	Modern	2.74	59691084	59588935	59518960	7572163771	7568861397	5200932	10529	171	14.6234	32128	45.43	0.72	41.9	2.7444	99.8289
NDama_Gambia_1990s	NDGT	NDGM	NDGM19	AFT	African taurine	Bos taurus	Gambia	1992	Previously part of microsatellite study	Modern	2.74	63408670	63350353	63314772	7552631060	7549548770	6976209	15127.3	148	14.3727	32828	46.23	0.61	42.12	2.7373	99.908
Mbororo	MBOR	MBOR	MBOR14	AFS	African Sanga	Bos taurus/Bos indicus hybrid	Nigeria	1992	Previously part of microsatellite study	Modern	2.73	63827812	63735924	63672400	7539314033	7534760000	7502911	19480.4	142	14.0629	32122	48.11	1.01	37.73	2.7325	99.856
NDama_Guinea_1990s	NDAG	NDAG	NDAG20	AFT	African taurine	Bos taurus	Guinea	1992	Previously part of microsatellite study	Modern	2.73	59082604	58985268	58927720	7521945517	7518980968	8399131	10101.4	176	14.8055	83118	45.43	0.68	42.4	2.7262	99.8353
Zebu_Gobra	ZEBG	ZEBG	ZEBG03	AFS	African Sanga	Bos indicus	Senegal	1992	Previously part of microsatellite study	Modern	2.73	60728970	60673254	60638460	7536704407	7532505520	6216918	13556.1	160	14.5781	32250	45.71	0.82	41.45	2.7315	99.9083
East_African_Short_Zebu	EASZ	EASZ	EASZ186	AZE	African Indicine Composite	Bos indicus	Kenya	Recent	Olivier Hanotte / Abdulfatai Tijjani	Modern	2.72	53384794	53127034	53078614	7513401906	7508942541	15733406	7248.88	223	15.0692	265910	47.76	0.85	40.9	2.7231	99.5172
Kapsiki	KAPS	KAPS	KAPS27	AFT	African taurine	Bos taurus	Cameroon	1992	Previously part of microsatellite study	Modern	2.72	63101828	63018558	62968288	7494704353	7490668011	9907143	19790.2	149	14.3574	16695	46.5	0.77	38.6	2.7163	99.868
Lagune	LAGU	LAGU	LAGU18	AFT	African taurine	Bos taurus	Benin	1992	Previously part of microsatellite study	Modern	2.72	59030748	58930946	58877966	7513987849	7510840153	7686800	11559.6	174	14.737	16598	45.12	0.6	42.3	2.7233	99.8309
White_Fulani	WHIT	WHIT	WHIT08	AFS	African Sanga	Bos indicus	Nigeria	1992	Previously part of microsatellite study	Modern	2.72	59980122	59906219	59857884	7495536600	7491121210	6427360	12826.5	168	14.5328	46908	45.25	0.88	41.47	2.7166	99.8768
Borgou	BORG	BORG	BORG42	AFS	African Sanga	Bos taurus/Bos indicus hybrid	Benin	1992	Previously part of microsatellite study	Modern	2.71	56428522	56329145	56263206	7490669155	7486638005	7231594	11314.4	205	14.8456	191786	44.1	0.84	42.71	2.7148	99.8239
Kapsiki	KAPS	KAPS	KAPS08	AFT	African taurine	Bos taurus	Cameroon	1992	Previously part of microsatellite study	Modern	2.71	62837524	62765373	62723258	7476082693	7472153695	9359108	15876.9	148	14.3221	16419	46.27	0.72	39.09	2.7096	99.8852
Kenana	KNAT	KENA	KENA23	AFI	African Indicine	Bos indicus	South Sudan	1990	Previously part of microsatellite study	Modern	2.71	63398676	63290427	63234412	7470041753	7465696074	6539965	20830.1	150	14.4611	35501	46.83	0.8	42.16	2.7074	99.8293
Mbororo	MBOR	MBOR	MBOR19	AFS	African Sanga	Bos taurus/Bos indicus hybrid	Nigeria	1992	Previously part of microsatellite study	Modern	2.71	61163324	61092272	61048850	7488481166	7484046654	6038516	14171	158	14.2953	30928	48.53	0.95	38.71	2.714	99.8838
Muturu_Nigeria_1990s	MUTT	MUTT	MUTT11	AFT	African taurine	Bos taurus	Nigeria	1992	Previously part of microsatellite study	Modern	2.71	61811864	61734927	61687104	7488661116	7485601738	8133340	14199.6	153	14.5802	82820	46.35	0.66	40.98	2.7141	99.8755
East_African_Short_Zebu	EASZ	EASZ	EASZ026	AZE	African Indicine Composite	Bos indicus	Kenya	Recent	Olivier Hanotte / Abdulfatai Tijjani	Modern	2.7	51696136	51477945	51426704	7440820956	7435936929	12845930	8474.12	252	15.1831	250353	45.77	0.92	42.28	2.6968	99.5779
Sokoto_Gudali	SOKO	SOKO	SOKO25	AFS	African Sanga	Bos indicus	Nigeria	1992	Previously part of microsatellite study	Modern	2.7	53185272	53028803	52907924	7453203309	7448646879	5349405	8188.85	238	14.7828	33352	44.33	1.66	41.33	2.7013	99.7058
Nguni	NGUN	NGUN	NGUN26	AFS	African Sanga	Bos taurus/Bos indicus hybrid	South Africa	2022	University of Pretoria	Modern	2.7	78909678	78796239	78758130	7444470365	7441417373	13322436	35237.1	96	13.664	90655	48.37	0.65	40.37	2.6981	99.8562
Lagune	LAGU	LAGU	LAGU17	AFT	African taurine	Bos taurus	Benin	1992	Previously part of microsatellite study	Modern	2.69	58504818	58407658	58354248	7432443870	7429587653	7905084	10950.3	171	14.7616	16255	45.06	0.57	43.18	2.6937	99.8339
NDama_Guinea_1990s	NDAG	NDAG	NDAG47	AFT	African taurine	Bos taurus	Guinea	1992	Previously part of microsatellite study	Modern	2.69	60283404	60169583	60102518	7416385701	7413519670	8379592	15111.3	165	14.6379	84089	45.75	0.67	42.09	2.6879	99.8112
Boran	BORA	BORA	BORA05	AFI	African Indicine	Bos indicus	Kenya	2000	Previously part of microsatellite study	Modern	2.67	64540830	64442442	64377472	7367443685	7363183118	6999202	22452.5	132	14.2611	31439	45.26	0.83	42.27	2.6702	99.8476
Tuli	TULI	TULI	TULI18	SAC	South African Composite	Bos taurus/Bos indicus hybrid	South Africa	2022	University of Pretoria	Modern	2.67	70267490	70179398	70139176	7361872663	7359042066	10423168	76230.8	118	13.9951	93215	47.26	0.67	40.2	2.6682	99.8746
Kapsiki	KAPS	KAPS	KAPS04	AFT	African taurine	Bos taurus	Cameroon	1992	Previously part of microsatellite study	Modern	2.66	62744286	62647422	62595238	7351175061	7347216568	10051902	19309.1	144	14.3016	16463	46.53	0.74	37.36	2.6643	99.8456
NDama_Senegal_1990s	NDST	NDST	NDST09	AFT	African taurine	Bos taurus	Senegal	1992	Previously part of microsatellite study	Modern	2.66	59399610	59302418	59245696	7344625199	7341605388	4858115	13406.7	159	14.5992	30575	45.59	0.69	41.73	2.6619	99.8364
NDama_Senegal_1990s	NDST	NDST	NDST17	AFT	African taurine	Bos taurus	Senegal	1992	Previously part of microsatellite study	Modern	2.66	62481486	62409828	62370062	7328733083	7325724189	5720418	14307.1	137	14.3443	30714	45.98	0.64	41.75	2.6562	99.8853
Zebu_Maure	ZBMT	ZBMA	ZBMA29	AFS	African Sanga	Bos indicus	Mauritania	1992	Previously part of microsatellite study	Modern	2.66	65159068	65087142	65054752	7332095829	7328410381	6803960	19224.2	127	14.0606	30953	45.69	0.69	42.34	2.6574	99.8896
Kapsiki	KAPS	KAPS	KAPS19	AFT	African taurine	Bos taurus	Cameroon	1992	Previously part of microsatellite study	Modern	2.64	60647900	60559429	60518038	7271556234	7267861661	9318616	16669.7	150	14.3303	15645	46.54	0.73	38.71	2.6354	99.8541
Kenana	KNAT	KENA	KENA32	AFI	African Indicine	Bos indicus	South Sudan	1990	Previously part of microsatellite study	Modern	2.64	63442682	63352257	63305504	7277142281	7272938427	6578308	17714.3	134	14.2085	33032	46.82	0.75	41.63	2.6375	99.8575
Lagune	LAGU	LAGU	LAGU05	AFT	African taurine	Bos taurus	Benin	1992	Previously part of microsatellite study	Modern	2.64	58860560	58791207	58753512	7276452243	7273743751	8464548	13136.2	159	14.5593	16554	45.12	0.53	43.22	2.6372	99.8822
East_African_Short_Zebu	EASZ	EASZ	EASZ204	AZE	African Indicine Composite	Bos indicus	Kenya	Recent	Olivier Hanotte / Abdulfatai Tijjani	Modern	2.63	50785276	50605605	50562752	7252552646	7249558109	14885138	7337.76	229	15.4101	257105	47.07	0.63	42.86	2.6285	99.6462
Butana	BUTA	BUTA	BUTA21	AFI	African Indicine	Bos indicus	Sudan	1992	Previously part of microsatellite study	Modern	2.63	59650942	59549396	59487198	7256736219	7252343621	5098902	14962	154	14.3694	30746	45.22	0.83	42.56	2.6301	99.8298
Kenana	KNAT	KENA	KENA26	AFI	African Indicine	Bos indicus	South Sudan	1990	Previously part of microsatellite study	Modern	2.63	61471840	61360054	61294940	7259881593	7255586717	7043823	20252.7	153	14.3273	33441	46.32	0.88	41.56	2.6312	99.8182
Lagune	LAGU	LAGU	LAGU15	AFT	African taurine	Bos taurus	Benin	1992	Previously part of microsatellite study	Modern	2.63	57240048	57155222	57097392	7260708547	7257826579	7636989	11471.9	173	14.6226	15867	45.44	0.59	42.58	2.6315	99.8518
NDama_Gambia_1990s	NDGT	NDGM	NDGM12	AFT	African taurine	Bos taurus	Gambia	1992	Previously part of microsatellite study	Modern	2.63	56938292	56827011	56745758	7254889165	7251723440	4967632	10566.7	171	14.7597	30979	45.62	0.75	41.68	2.6294	99.8046
Kapsiki	KAPS	KAPS	KAPS26	AFT	African taurine	Bos taurus	Cameroon	1992	Previously part of microsatellite study	Modern	2.61	58215544	58130017	58089682	7211983685	7208118784	8779363	12642.9	164	14.5991	15850	45.61	0.74	39.13	2.6138	99.8531
Muturu_Nigeria_1990s	MUTT	MUTT	MUTT02	AFT	African taurine	Bos taurus	Nigeria	1992	Previously part of microsatellite study	Modern	2.61	57033256	56966682	56927954	7187874998	7184989591	7518895	10582.1	170	14.6092	82756	45.89	0.67	41.43	2.6051	99.8833
Muturu_Nigeria_1990s	MUTT	MUTT	MUTT25	AFT	African taurine	Bos taurus	Nigeria	1992	Previously part of microsatellite study	Modern	2.61	58738504	58673777	58638630	7207232702	7204437927	7719647	12414.6	159	14.5389	79513	45.74	0.6	42.58	2.6121	99.8898
NDama_Gambia_1990s	NDGT	NDGM	NDGM22	AFT	African taurine	Bos taurus	Gambia	1992	Previously part of microsatellite study	Modern	2.61	58286744	58216042	58174092	7212369087	7209080021	6759217	13719.2	162	14.5911	32138	46.09	0.7	40.87	2.614	99.8787
NDama_Guinea_1990s	NDAG	NDAG	NDAG11	AFT	African taurine	Bos taurus	Guinea	1992	Previously part of microsatellite study	Modern	2.61	57653242	57575204	57525742	7201804672	7199069864	8169709	10899.5	168	14.6581	80460	45.9	0.68	42.4	2.6101	99.8646
Tuli	TULI	TULI	TULI44	SAC	South African Composite	Bos taurus/Bos indicus hybrid	South Africa	2022	University of Pretoria	Modern	2.61	62239602	62121960	62090150	7201174024	7198039331	7309109	20705.5	135	14.9242	92816	45.24	0.65	43.49	2.6099	99.811
NDama_Guinea_1990s	NDAG	NDAG	NDAG59	AFT	African taurine	Bos taurus	Guinea	1992	Previously part of microsatellite study	Modern	2.6	56800840	56729416	56693072	7168592728	7165889212	6770734	13280.3	176	14.7837	76200	45.29	0.72	42.82	2.5981	99.8743
Tuli	TULI	TULI	TULI39	SAC	South African Composite	Bos taurus/Bos indicus hybrid	South Africa	2022	University of Pretoria	Modern	2.6	68853968	68277333	68214454	7177492890	7174694804	10580698	40484	119	15.455	89302	47.49	0.68	41.34	2.6013	99.1625
Namchi	NAMC	NAMC	NAMC24	AFT	African taurine	Bos taurus	Cameroon	1992	Previously part of microsatellite study	Modern	2.59	61770036	61671046	61604306	7148202309	7144585141	8342323	19347.1	138	14.2573	44943	46.2	0.79	39.48	2.5907	99.8397
Zebu_Gobra	ZEBG	ZEBG	ZEBG21	AFS	African Sanga	Bos indicus	Senegal	1992	Previously part of microsatellite study	Modern	2.59	58700174	58628984	58582546	7153867422	7149783440	6836359	15830.4	159	14.4799	32245	46.08	0.83	40.85	2.5928	99.8787
Tuli	TULI	TULI	TULI47	SAC	South African Composite	Bos taurus/Bos indicus hybrid	South Africa	2022	University of Pretoria	Modern	2.59	65435802	65371028	65343192	7147258356	7144278148	9020568	23042.6	123	14.1903	94695	46.33	0.62	42.18	2.5904	99.901
Borgou	BORG	BORG	BORG19	AFS	African Sanga	Bos taurus/Bos indicus hybrid	Benin	1992	Previously part of microsatellite study	Modern	2.58	53424380	53344033	53310446	7106263082	7102484419	6517760	11356.5	208	14.9526	168682	44.94	1.03	41.2	2.5755	99.8496
Muturu_Nigeria_1990s	MUTT	MUTT	MUTT21	AFT	African taurine	Bos taurus	Nigeria	1992	Previously part of microsatellite study	Modern	2.58	59131502	59050806	58996014	7130934424	7128220405	7523834	13624	152	14.4916	80334	46.09	0.65	42.74	2.5845	99.8635
NDama_Guinea_1990s	NDAG	NDAG	NDAG37	AFT	African taurine	Bos taurus	Guinea	1992	Previously part of microsatellite study	Modern	2.58	56462534	56403021	56375368	7117240172	7114487663	6602012	12610.7	173	14.7896	75918	45.95	0.71	41.9	2.5795	99.8946
Kuri	KRIT	KURI	KURI13	AFT	African taurine	Bos taurus	Chad	1992	Previously part of microsatellite study	Modern	2.57	55409740	55352008	55318502	7100091712	7096153174	7230683	9477.69	176	14.6576	181615	44.96	0.78	40.98	2.5733	99.8958
Mashona	MASH	MASH	MASH22	AFS	African Sanga	Bos taurus/Bos indicus hybrid	South Africa	2022	University of Pretoria	Modern	2.57	77396004	77215294	77166810	7084286215	7081490582	12885565	70262	94	13.917	87370	49.5	0.66	38.53	2.5676	99.7665
Nguni	NGUN	NGUN	NGUN41	AFS	African Sanga	Bos taurus/Bos indicus hybrid	South Africa	2022	University of Pretoria	Modern	2.57	62577588	62502623	62471196	7104475873	7101423411	8407388	22025.4	130	14.2994	89838	45.61	0.68	43.02	2.5749	99.8802
Tuli	TULI	TULI	TULI35	SAC	South African Composite	Bos taurus/Bos indicus hybrid	South Africa	2022	University of Pretoria	Modern	2.56	66307640	66211328	66173750	7050393169	7047600338	9799359	28461.1	118	14.2581	89504	46.4	0.64	42.48	2.5553	99.8547
Kapsiki	KAPS	KAPS	KAPS25	AFT	African taurine	Bos taurus	Cameroon	1992	Previously part of microsatellite study	Modern	2.55	59123516	59060958	59024988	7024446577	7020923953	9258659	14825.8	143	14.3642	15788	46.04	0.68	39.56	2.5459	99.8942
Kapsiki	KAPS	KAPS	KAPS39	AFT	African taurine	Bos taurus	Cameroon	1992	Previously part of microsatellite study	Modern	2.55	57992068	57915076	57869056	7032411599	7028710343	8384372	16905.7	157	14.4903	15362	45.82	0.73	39.25	2.5488	99.8672
Sokoto_Gudali	SOKO	SOKO	SOKO14	AFS	African Sanga	Bos indicus	Nigeria	1992	Previously part of microsatellite study	Modern	2.55	55317596	55250893	55210444	7047050387	7042602797	7345088	11845.6	182	14.5552	79881	45.3	0.92	40.75	2.5541	99.8794
Borgou	BORG	BORG	BORG14	AFS	African Sanga	Bos taurus/Bos indicus hybrid	Benin	1992	Previously part of microsatellite study	Modern	2.54	53524464	53441528	53385468	7003816488	7000273743	7524962	9537.91	197	14.8298	182194	45.45	0.8	41.27	2.5384	99.8451
Kuri	KRIT	KURI	KURI21	AFT	African taurine	Bos taurus	Chad	1992	Previously part of microsatellite study	Modern	2.53	54179024	54129543	54102912	6974204703	6970393817	6994879	9860.8	177	14.7195	180177	44.93	0.74	41.32	2.5277	99.9087
NDama_Guinea_1990s	NDAG	NDAG	NDAG18	AFT	African taurine	Bos taurus	Guinea	1992	Previously part of microsatellite study	Modern	2.53	54484826	54351269	54253898	6969780552	6967018901	5958879	11044.5	182	14.8016	77651	45.48	0.71	42.47	2.5261	99.7549
Sokoto_Gudali	SOKO	SOKO	SOKO29	AFS	African Sanga	Bos indicus	Nigeria	1992	Previously part of microsatellite study	Modern	2.53	53996140	53883722	53798038	6990656400	6986355687	6064796	11035.1	190	14.734	43909	45.01	1	40.44	2.5336	99.7918
Tuli	TULI	TULI	TULI10	SAC	South African Composite	Bos taurus/Bos indicus hybrid	South Africa	2022	University of Pretoria	Modern	2.53	63068444	63011136	62985286	6990929119	6988177889	8479604	24257.3	124	14.1724	85792	46.82	0.68	41.76	2.5337	99.9091
Lagune	LAGU	LAGU	LAGU19	AFT	African taurine	Bos taurus	Benin	1992	Previously part of microsatellite study	Modern	2.52	53959450	53902104	53873666	6957172307	6954396047	6629580	10581.3	187	14.811	12833	45.26	0.63	42.08	2.5215	99.8937
Lagune	LAGU	LAGU	LAGU21	AFT	African taurine	Bos taurus	Benin	1992	Previously part of microsatellite study	Modern	2.52	56910240	56838339	56790570	6953713670	6951125320	7752839	14000.4	152	14.5414	15278	45.34	0.54	42.99	2.5202	99.8737
NDama_Guinea_1990s	NDAG	NDAG	NDAG51	AFT	African taurine	Bos taurus	Guinea	1992	Previously part of microsatellite study	Modern	2.52	56146956	56068675	56024726	6964931092	6962244025	6965729	14498	167	14.6765	78025	45.62	0.63	42.38	2.5243	99.8606
East_African_Short_Zebu	EASZ	EASZ	EASZ134	AZE	African Indicine Composite	Bos indicus	Kenya	Recent	Olivier Hanotte / Abdulfatai Tijjani	Modern	2.51	48223484	48011910	47950304	6923415170	6919810015	12174968	7980.14	250	15.3743	235552	46.56	0.79	42.67	2.5093	99.5613
Muturu_Nigeria_1990s	MUTT	MUTT	MUTT22	AFT	African taurine	Bos taurus	Nigeria	1992	Previously part of microsatellite study	Modern	2.51	56158856	56073857	56018736	6927187828	6924497071	6412031	12775.9	163	14.4997	77629	45.76	0.68	42.44	2.5106	99.8486
NDama_Gambia_1990s	NDGT	NDGM	NDGM21	AFT	African taurine	Bos taurus	Gambia	1992	Previously part of microsatellite study	Modern	2.51	55759468	55704457	55673366	6934155894	6931239486	5962744	12579.8	166	14.6244	29776	45.74	0.62	41.89	2.5131	99.9013
Mashona	MASH	MASH	MASH18	AFS	African Sanga	Bos taurus/Bos indicus hybrid	South Africa	2022	University of Pretoria	Modern	2.51	76771984	76556187	76508634	6925511716	6922875052	13549862	76581.8	94	13.5799	86612	50.02	0.67	37.89	2.51	99.7189
Kapsiki	KAPS	KAPS	KAPS37	AFT	African taurine	Bos taurus	Cameroon	1992	Previously part of microsatellite study	Modern	2.5	57866288	57796135	57756674	6885833174	6882156525	9288210	17101.8	145	14.3035	15654	45.56	0.73	38.36	2.4956	99.8788
Muturu_Nigeria_1990s	MUTT	MUTT	MUTT18	AFT	African taurine	Bos taurus	Nigeria	1992	Previously part of microsatellite study	Modern	2.5	56334292	56269486	56233000	6891167949	6888476753	6968328	12892.8	162	14.5795	77414	45.81	0.62	42.15	2.4976	99.885
Namchi	NAMC	NAMC	NAMC45	AFT	African taurine	Bos taurus	Cameroon	1992	Previously part of microsatellite study	Modern	2.5	57024360	56952689	56909834	6900439801	6897336856	6788398	14283.6	149	14.4196	43839	45.85	0.7	41.17	2.5009	99.8743
NDama_Gambia_1990s	NDGT	NDGM	NDGM15	AFT	African taurine	Bos taurus	Gambia	1992	Previously part of microsatellite study	Modern	2.5	56527002	56452944	56405704	6911565477	6908628265	4857056	15000.8	156	14.4795	29282	45.7	0.67	42.22	2.505	99.869
NDama_Guinea_1990s	NDAG	NDAG	NDAG21	AFT	African taurine	Bos taurus	Guinea	1992	Previously part of microsatellite study	Modern	2.5	54466688	54400212	54359890	6908487812	6905789913	5872080	11026	180	14.644	76548	45.68	0.68	42.39	2.5038	99.878
NDama_Senegal_1990s	NDST	NDST	NDST05	AFT	African taurine	Bos taurus	Senegal	1992	Previously part of microsatellite study	Modern	2.5	56889964	56815745	56777588	6885590042	6882794816	4949745	12945.5	146	14.4749	29284	45.52	0.65	42.28	2.4955	99.8695
East_African_Short_Zebu	EASZ	EASZ	EASZ146	AZE	African Indicine Composite	Bos indicus	Kenya	Recent	Olivier Hanotte / Abdulfatai Tijjani	Modern	2.49	48407592	48232719	48196596	6858951000	6855566302	14951582	5973.78	217	15.207	240623	48.28	0.79	41.63	2.4859	99.6387
Kapsiki	KAPS	KAPS	KAPS05	AFT	African taurine	Bos taurus	Cameroon	1992	Previously part of microsatellite study	Modern	2.49	56775678	56702119	56660796	6873589524	6869398730	8999878	14920.7	153	14.3774	14831	46.41	0.86	35.57	2.4912	99.8704
Kapsiki	KAPS	KAPS	KAPS38	AFT	African taurine	Bos taurus	Cameroon	1992	Previously part of microsatellite study	Modern	2.49	57172608	57019745	56980040	6882957303	6879335760	8706414	16015	151	14.7055	14751	45.5	0.72	38.99	2.4946	99.7326
Mbororo	MBOR	MBOR	MBOR29	AFS	African Sanga	Bos taurus/Bos indicus hybrid	Nigeria	1992	Previously part of microsatellite study	Modern	2.49	56937376	56870142	56825330	6881419904	6877409275	6090089	15986.8	157	14.036	27979	49.12	1.01	38.37	2.494	99.8819
Namchi	NAMC	NAMC	NAMC28	AFT	African taurine	Bos taurus	Cameroon	1992	Previously part of microsatellite study	Modern	2.49	60220914	59977478	59945508	6883214821	6879920123	8617518	14780.4	132	14.812	41604	46.35	0.68	39.78	2.4947	99.5958
NDama_Guinea_1990s	NDAG	NDAG	NDAG14	AFT	African taurine	Bos taurus	Guinea	1992	Previously part of microsatellite study	Modern	2.48	54148694	54084674	54048984	6839657495	6836968578	6247443	10351.1	172	14.7675	76441	45.95	0.62	42.37	2.4789	99.8818
Nguni	NGUN	NGUN	NGUN48	AFS	African Sanga	Bos taurus/Bos indicus hybrid	South Africa	2022	University of Pretoria	Modern	2.48	62418116	62342861	62308348	6841410161	6838449744	8310867	26208.6	124	14.0834	87353	45.88	0.65	42.82	2.4795	99.8794
Tuli	TULI	TULI	TULI42	SAC	South African Composite	Bos taurus/Bos indicus hybrid	South Africa	2022	University of Pretoria	Modern	2.48	65360756	65270292	65232014	6840864872	6838122239	10486762	46885.2	122	14.0752	87405	47.45	0.67	41.49	2.4793	99.8616
East_African_Short_Zebu	EASZ	EASZ	EASZ005	AZE	African Indicine Composite	Bos indicus	Kenya	Recent	Olivier Hanotte / Abdulfatai Tijjani	Modern	2.47	47593138	47317337	47261114	6806104722	6801930497	12317267	9232.8	246	15.332	231122	46.04	0.88	42.07	2.4667	99.4205
Borgou	BORG	BORG	BORG29	AFS	African Sanga	Bos taurus/Bos indicus hybrid	Benin	1992	Previously part of microsatellite study	Modern	2.47	52646518	52584074	52543304	6815532472	6811874479	6444211	10099.5	187	14.7554	170116	44.81	0.78	42.05	2.4702	99.8814
Butana	BUTA	BUTA	BUTA25	AFI	African Indicine	Bos indicus	Sudan	1992	Previously part of microsatellite study	Modern	2.47	55933692	55878622	55849470	6803411089	6799383458	4240953	17269.8	157	14.4283	18461	45.28	1.05	42.11	2.4658	99.9015
Kuri	KRIT	KURI	KURI14	AFT	African taurine	Bos taurus	Chad	1992	Previously part of microsatellite study	Modern	2.47	54819720	54761926	54740628	6828435672	6824705911	7176450	10476.3	159	14.6925	171665	45.44	0.8	40.61	2.4748	99.8946
Kuri	KRIT	KURI	KURI47	AFT	African taurine	Bos taurus	Chad	1992	Previously part of microsatellite study	Modern	2.47	57326308	55294831	55218756	6816305516	6812291829	8639412	10933	165	15.1199	175654	44.95	0.82	39.8	2.4704	96.4563
Sokoto_Gudali	SOKO	SOKO	SOKO16	AFS	African Sanga	Bos indicus	Nigeria	1992	Previously part of microsatellite study	Modern	2.47	53169790	53054924	52968836	6824272219	6820031621	7382704	11702.5	185	14.4885	74773	45.1	1.08	40.75	2.4733	99.784
Tuli	TULI	TULI	TULI24	SAC	South African Composite	Bos taurus/Bos indicus hybrid	South Africa	2022	University of Pretoria	Modern	2.47	61187680	61112795	61084430	6807745895	6805035679	8434776	29559	127	14.09	89627	46.16	0.6	42.83	2.4673	99.8776
Kenana	KNAT	KENA	KENA37	AFI	African Indicine	Bos indicus	South Sudan	1990	Previously part of microsatellite study	Modern	2.46	62240054	62159129	62116992	6783944092	6780376131	6789636	18893.8	117	14.1015	30428	46.99	0.71	40.24	2.4587	99.87
Butana	BUTA	BUTA	BUTA33	AFI	African Indicine	Bos indicus	Sudan	1992	Previously part of microsatellite study	Modern	2.45	55945780	55867123	55824644	6765512885	6761399464	5221483	15980.9	151	14.5631	30132	45.05	0.81	42.8	2.452	99.8594
Kapsiki	KAPS	KAPS	KAPS07	AFT	African taurine	Bos taurus	Cameroon	1992	Previously part of microsatellite study	Modern	2.45	57059358	56994382	56961078	6750845626	6746802017	8961575	14780.6	140	14.324	14410	46.36	0.81	36.99	2.4467	99.8861
Nguni	NGUN	NGUN	NGUN45	AFS	African Sanga	Bos taurus/Bos indicus hybrid	South Africa	2022	University of Pretoria	Modern	2.45	62968490	62874344	62831488	6759071172	6756286485	8605583	33608.5	120	13.9011	85891	46.65	0.64	42.41	2.4497	99.8505
NDama_Guinea_1990s	NDAG	NDAG	NDAG55	AFT	African taurine	Bos taurus	Guinea	1992	Previously part of microsatellite study	Modern	2.44	51829244	51754869	51708896	6738167659	6735517144	5531784	10571.5	188	14.7744	74998	45.25	0.67	42.38	2.4421	99.8565
Tuli	TULI	TULI	TULI36	SAC	South African Composite	Bos taurus/Bos indicus hybrid	South Africa	2022	University of Pretoria	Modern	2.44	58553546	58486855	58457004	6722324066	6719601176	7531157	29302.1	133	14.3783	84646	45.98	0.67	42.84	2.4364	99.8861
East_African_Short_Zebu	EASZ	EASZ	EASZ188	AZE	African Indicine Composite	Bos indicus	Kenya	Recent	Olivier Hanotte / Abdulfatai Tijjani	Modern	2.43	47168126	46958604	46922572	6694524869	6690191879	14056732	7463.81	222	15.1078	237391	47.39	0.92	41.49	2.4263	99.5558
Kapsiki	KAPS	KAPS	KAPS06	AFT	African taurine	Bos taurus	Cameroon	1992	Previously part of microsatellite study	Modern	2.43	60971196	60905566	60865956	6695067828	6691450647	10355238	21835.7	122	13.8965	14879	47.79	0.73	35.37	2.4265	99.8924
Kapsiki	KAPS	KAPS	KAPS35	AFT	African taurine	Bos taurus	Cameroon	1992	Previously part of microsatellite study	Modern	2.43	55574714	55489302	55446002	6704591670	6700978112	8621935	17400.7	151	14.5012	14644	45.77	0.74	38.41	2.4299	99.8463
Sokoto_Gudali	SOKO	SOKO	SOKO40	AFS	African Sanga	Bos indicus	Nigeria	1992	Previously part of microsatellite study	Modern	2.43	51134752	51053664	51004014	6711634443	6707546981	4613278	10098.5	189	14.5497	37766	44.99	1.1	41.49	2.4325	99.8414
Kapsiki	KAPS	KAPS	KAPS28	AFT	African taurine	Bos taurus	Cameroon	1992	Previously part of microsatellite study	Modern	2.42	56071590	55900249	55864928	6683160337	6679599074	8530671	15363.4	145	14.7706	14891	45.45	0.71	39.41	2.4222	99.6944
Mbororo	MBOR	MBOR	MBOR31	AFS	African Sanga	Bos taurus/Bos indicus hybrid	Nigeria	1992	Previously part of microsatellite study	Modern	2.42	53660988	53607910	53572434	6688541973	6684702002	5251531	14891.3	164	14.2076	20346	50.03	1.23	37.9	2.4241	99.9011
Tuli	TULI	TULI	TULI32	SAC	South African Composite	Bos taurus/Bos indicus hybrid	South Africa	2022	University of Pretoria	Modern	2.42	53590170	53528263	53505544	6673792229	6670849110	6998966	18172.8	163	14.7429	86821	44.93	0.69	42.95	2.4188	99.8845
East_African_Short_Zebu	EASZ	EASZ	EASZ034	AZE	African Indicine Composite	Bos indicus	Kenya	Recent	Olivier Hanotte / Abdulfatai Tijjani	Modern	2.41	46270234	46097045	46046192	6646990597	6643845732	11650267	6894.8	245	15.4422	225724	45.81	0.73	43.23	2.4091	99.6257
East_African_Short_Zebu	EASZ	EASZ	EASZ061	AZE	African Indicine Composite	Bos indicus	Kenya	Recent	Olivier Hanotte / Abdulfatai Tijjani	Modern	2.4	46220394	46026669	45986812	6616693792	6612381435	11709672	9184.66	243	15.0774	225729	46.59	0.9	41.8	2.3981	99.5809
Borgou	BORG	BORG	BORG22	AFS	African Sanga	Bos taurus/Bos indicus hybrid	Benin	1992	Previously part of microsatellite study	Modern	2.4	48881934	48784417	48720314	6612330525	6608757745	6432650	10980.4	225	15.0789	169664	44.88	0.81	41.6	2.3965	99.8005
Muturu_Nigeria_1990s	MUTT	MUTT	MUTT10	AFT	African taurine	Bos taurus	Nigeria	1992	Previously part of microsatellite study	Modern	2.4	53355900	53291115	53254534	6633811002	6631135222	7282941	11084.9	162	14.5897	74976	45.87	0.63	41.94	2.4043	99.8786
Namchi	NAMC	NAMC	NAMC21	AFT	African taurine	Bos taurus	Cameroon	1992	Previously part of microsatellite study	Modern	2.4	56762218	56688633	56643438	6631997698	6628834042	7266665	17406.9	137	14.2718	42206	45.93	0.71	39.43	2.4036	99.8704
Zebu_Gobra	ZEBG	ZEBG	ZEBG30	AFS	African Sanga	Bos indicus	Senegal	1992	Previously part of microsatellite study	Modern	2.4	53054044	52991621	52952996	6619027725	6615326283	5907908	12119.4	167	14.5443	29713	45.33	0.79	41.32	2.3989	99.8823
NDama_Guinea_1990s	NDAG	NDAG	NDAG39	AFT	African taurine	Bos taurus	Guinea	1992	Previously part of microsatellite study	Modern	2.39	51048052	50919039	50844514	6586226884	6583590223	6058758	10110.9	175	14.9754	73571	45.51	0.71	42.22	2.387	99.7473
NDama_Guinea_1990s	NDAG	NDAG	NDAG54	AFT	African taurine	Bos taurus	Guinea	1992	Previously part of microsatellite study	Modern	2.39	53611502	53538510	53490902	6605778019	6603298307	6893142	13297.9	168	14.5887	74624	45.57	0.65	42.79	2.3941	99.8639
Sokoto_Gudali	SOKO	SOKO	SOKO38	AFS	African Sanga	Bos indicus	Nigeria	1992	Previously part of microsatellite study	Modern	2.39	51347764	51253071	51191996	6598495961	6594425991	5724243	11584.7	181	14.6732	40917	45.03	0.97	41.35	2.3915	99.8156
NDama_Guinea_1990s	NDAG	NDAG	NDAG40	AFT	African taurine	Bos taurus	Guinea	1992	Previously part of microsatellite study	Modern	2.37	52531158	52433373	52364818	6538779354	6536296688	6582937	12518.7	159	14.5853	72836	45.57	0.69	42.54	2.3698	99.8139
NDama_Guinea_1990s	NDAG	NDAG	NDAG13	AFT	African taurine	Bos taurus	Guinea	1992	Previously part of microsatellite study	Modern	2.37	48943158	48893449	48867962	6525395397	6522759631	5997634	6158.02	171	15.0919	72442	45.29	0.63	40.76	2.365	99.8984
East_African_Short_Zebu	EASZ	EASZ	EASZ044	AZE	African Indicine Composite	Bos indicus	Kenya	Recent	Olivier Hanotte / Abdulfatai Tijjani	Modern	2.36	45336480	45126877	45070466	6506729315	6502303342	13117617	9772.42	257	15.0357	231940	47.47	1.01	40.94	2.3582	99.5377
NDama_Guinea_1990s	NDAG	NDAG	NDAG38	AFT	African taurine	Bos taurus	Guinea	1992	Previously part of microsatellite study	Modern	2.36	51798616	51717452	51668708	6519675516	6517138887	6422125	12673	174	14.7045	72913	45.9	0.71	42.04	2.3629	99.8433
Butana	BUTA	BUTA	BUTA34	AFI	African Indicine	Bos indicus	Sudan	1992	Previously part of microsatellite study	Modern	2.35	52065300	51952477	51882454	6470851566	6466883613	3451371	15746.2	174	14.4639	33393	45.36	0.9	42.43	2.3452	99.7833
NDama_Guinea_1990s	NDAG	NDAG	NDAG15	AFT	African taurine	Bos taurus	Guinea	1992	Previously part of microsatellite study	Modern	2.35	52907768	52819541	52777526	6493283934	6490781015	6372329	14294.2	160	14.675	73098	45.7	0.63	42.69	2.3534	99.8332
Muturu_Nigeria_1990s	MUTT	MUTT	MUTT27	AFT	African taurine	Bos taurus	Nigeria	1992	Previously part of microsatellite study	Modern	2.34	50955476	50888229	50852884	6459749809	6457092167	5481421	11913.7	174	14.6722	71686	45.48	0.66	41.74	2.3412	99.868
NDama_Gambia_1990s	NDGT	NDGM	NDGM11	AFT	African taurine	Bos taurus	Gambia	1992	Previously part of microsatellite study	Modern	2.34	50753252	50669613	50615836	6450403371	6447591588	4189133	11966.5	172	14.7433	27813	45.63	0.76	41.52	2.3378	99.8352
NDama_Guinea_1990s	NDAG	NDAG	NDAG44	AFT	African taurine	Bos taurus	Guinea	1992	Previously part of microsatellite study	Modern	2.34	52537210	52470006	52438268	6463000794	6460526444	6061740	14945.2	164	14.5487	71916	45.81	0.62	42.32	2.3424	99.8721
NDama_Guinea_1990s	NDAG	NDAG	NDAG57	AFT	African taurine	Bos taurus	Guinea	1992	Previously part of microsatellite study	Modern	2.34	50833830	50725530	50646534	6444249365	6441801119	6140471	10579.4	177	14.716	71338	45.51	0.71	42.57	2.3356	99.787
White_Fulani	WHIT	WHIT	WHIT18	AFS	African Sanga	Bos indicus	Nigeria	1992	Previously part of microsatellite study	Modern	2.34	51265606	51187514	51139080	6465973610	6462104469	5092957	12759.1	171	14.5238	40584	45.07	0.89	41.68	2.3435	99.8477
East_African_Short_Zebu	EASZ	EASZ	EASZ160	AZE	African Indicine Composite	Bos indicus	Kenya	Recent	Olivier Hanotte / Abdulfatai Tijjani	Modern	2.32	44872670	44459055	44422044	6406364006	6403602808	11600838	7493.29	243	16.1565	217410	47	0.69	42.6	2.3219	99.0782
Sokoto_Gudali	SOKO	SOKO	SOKO07	AFS	African Sanga	Bos indicus	Nigeria	1992	Previously part of microsatellite study	Modern	2.32	50295638	50230842	50189284	6414124621	6410206702	5854822	13630	184	14.6652	71824	45.04	0.88	41.81	2.3247	99.8712
Tuli	TULI	TULI	TULI48	SAC	South African Composite	Bos taurus/Bos indicus hybrid	South Africa	2022	University of Pretoria	Modern	2.32	57817088	57745942	57717402	6408450118	6405833359	7709252	22191.5	124	14.1573	80475	45.77	0.66	42.66	2.3226	99.8769
NDama_Guinea_1990s	NDAG	NDAG	NDAG42	AFT	African taurine	Bos taurus	Guinea	1992	Previously part of microsatellite study	Modern	2.31	52556660	52384844	52347760	6383397742	6380957873	6355858	15123.1	160	15.0692	71003	45.6	0.62	42.41	2.3135	99.6731
NDama_Guinea_1990s	NDAG	NDAG	NDAG34	AFT	African taurine	Bos taurus	Guinea	1992	Previously part of microsatellite study	Modern	2.31	51507428	51434163	51393892	6380593483	6378141466	6121246	14260.9	169	14.7145	71912	45.88	0.69	42.02	2.3125	99.8578
Nguni	NGUN	NGUN	NGUN42	AFS	African Sanga	Bos taurus/Bos indicus hybrid	South Africa	2022	University of Pretoria	Modern	2.31	67367810	67241243	67203388	6384951316	6382006442	10059067	40326.6	95	13.6778	76658	49.52	0.71	37.49	2.3141	99.8121
East_African_Short_Zebu	EASZ	EASZ	EASZ032	AZE	African Indicine Composite	Bos indicus	Kenya	Recent	Olivier Hanotte / Abdulfatai Tijjani	Modern	2.3	44577734	44392512	44355536	6347059139	6343172780	12990525	9450.25	231	15.2652	224151	47.5	0.89	40.65	2.3004	99.5845
Namchi	NAMC	NAMC	NAMC48	AFT	African taurine	Bos taurus	Cameroon	1992	Previously part of microsatellite study	Modern	2.29	50039070	49975389	49932118	6318382865	6315501371	5772964	10708.7	167	14.6267	38613	44.78	0.78	41.33	2.29	99.8727
Tuli	TULI	TULI	TULI16	SAC	South African Composite	Bos taurus/Bos indicus hybrid	South Africa	2022	University of Pretoria	Modern	2.29	61667022	61592133	61564324	6318104253	6315746287	8908474	29696.8	110	13.947	80380	46.88	0.6	42.23	2.2899	99.8786
Borgou	BORG	BORG	BORG13	AFS	African Sanga	Bos taurus/Bos indicus hybrid	Benin	1992	Previously part of microsatellite study	Modern	2.28	47320288	47242840	47189396	6298874465	6295497788	7084745	10027.8	212	14.7789	163290	45.02	0.81	41.48	2.2829	99.8363
Kuri	KRIT	KURI	KURI19	AFT	African taurine	Bos taurus	Chad	1992	Previously part of microsatellite study	Modern	2.28	50531946	50486738	50460150	6288332736	6284945418	6759755	11172.9	161	14.6429	160158	45.01	0.72	40.9	2.2791	99.9105
Mashona	MASH	MASH	MASH19	AFS	African Sanga	Bos taurus/Bos indicus hybrid	South Africa	2022	University of Pretoria	Modern	2.28	61122888	60969477	60930788	6287413113	6284739216	8456844	43346.4	110	14.1174	77344	47.95	0.75	40.38	2.2787	99.749
Nguni	NGUN	NGUN	NGUN52	AFS	African Sanga	Bos taurus/Bos indicus hybrid	South Africa	2022	University of Pretoria	Modern	2.28	64241260	64107546	64071496	6284420386	6281670792	9732163	35693.1	99	13.8128	79188	48.44	0.67	39.75	2.2777	99.7919
Tuli	TULI	TULI	TULI29	SAC	South African Composite	Bos taurus/Bos indicus hybrid	South Africa	2022	University of Pretoria	Modern	2.28	58303720	58237753	58213202	6301079094	6298643121	7997489	27621.2	121	14.2166	81776	46	0.55	43.31	2.2837	99.8869
East_African_Short_Zebu	EASZ	EASZ	EASZ120	AZE	African Indicine Composite	Bos indicus	Kenya	Recent	Olivier Hanotte / Abdulfatai Tijjani	Modern	2.27	44485160	44285365	44253782	6256443390	6252458338	13360500	6239.93	215	15.1759	217303	49.09	0.99	40.8	2.2675	99.5509
NDama_Guinea_1990s	NDAG	NDAG	NDAG49	AFT	African taurine	Bos taurus	Guinea	1992	Previously part of microsatellite study	Modern	2.27	51071304	51012770	50975426	6253908832	6251594178	5684527	15320.2	163	14.5189	65386	46.11	0.83	41.99	2.2666	99.8854
Sokoto_Gudali	SOKO	SOKO	SOKO17	AFS	African Sanga	Bos indicus	Nigeria	1992	Previously part of microsatellite study	Modern	2.27	47427498	47335743	47266626	6263136569	6259259210	5581543	9500.8	196	14.7549	67813	44.73	0.99	41.44	2.2699	99.8065
Kapsiki	KAPS	KAPS	KAPS34	AFT	African taurine	Bos taurus	Cameroon	1992	Previously part of microsatellite study	Modern	2.25	52457938	52380998	52345700	6217578929	6214349466	8140150	15597.3	146	14.3536	13886	46.04	0.71	39.14	2.2534	99.8533
Muturu_Nigeria_1990s	MUTT	MUTT	MUTT13	AFT	African taurine	Bos taurus	Nigeria	1992	Previously part of microsatellite study	Modern	2.25	50494808	50430280	50394780	6197994384	6195455693	6170867	14370.7	161	14.5223	70125	46	0.63	41.3	2.2463	99.8722
NDama_Nigeria_1990s	NDNT	NDNT	NDNT08	AFT	African taurine	Bos taurus	Nigeria	1992	Previously part of microsatellite study	Modern	2.25	43406996	43303584	43225640	6217564992	6215095049	2962457	6196.59	250	15.2425	13158	44.55	1.36	43.02	2.2534	99.7618
Sokoto_Gudali	SOKO	SOKO	SOKO12	AFS	African Sanga	Bos indicus	Nigeria	1992	Previously part of microsatellite study	Modern	2.25	49478978	49406279	49360282	6220929335	6217129988	5904086	14410.3	177	14.5577	68980	45.15	0.94	41.52	2.2547	99.8531
Zebu_Gobra	ZEBG	ZEBG	ZEBG05	AFS	African Sanga	Bos indicus	Senegal	1992	Previously part of microsatellite study	Modern	2.25	51098848	51038676	50999754	6210514961	6207181919	5448934	15946.7	150	14.3748	27610	44.88	0.75	42.75	2.2509	99.8822
Kapsiki	KAPS	KAPS	KAPS18	AFT	African taurine	Bos taurus	Cameroon	1992	Previously part of microsatellite study	Modern	2.24	53659604	53584959	53547242	6179697870	6176294417	8880923	18497.2	137	14.1656	13673	47.12	0.79	35.66	2.2397	99.8609
Zebu_Gobra	ZEBG	ZEBG	ZEBG29	AFS	African Sanga	Bos indicus	Senegal	1992	Previously part of microsatellite study	Modern	2.24	49166828	49100046	49052764	6187053336	6183535269	4388901	14251.2	171	14.5492	27648	45.03	0.82	41.53	2.2424	99.8642
Nguni	NGUN	NGUN	NGUN32	AFS	African Sanga	Bos taurus/Bos indicus hybrid	South Africa	2022	University of Pretoria	Modern	2.24	57035456	56966434	56936398	6194122824	6191436074	7613923	39685.1	122	14.0051	79684	46.38	0.65	41.94	2.2449	99.879
Tuli	TULI	TULI	TULI12	SAC	South African Composite	Bos taurus/Bos indicus hybrid	South Africa	2022	University of Pretoria	Modern	2.24	50344104	50285960	50264702	6189914776	6187385553	6702018	16267.1	163	14.822	80242	45.11	0.67	43.75	2.2434	99.8845
East_African_Short_Zebu	EASZ	EASZ	EASZ035	AZE	African Indicine Composite	Bos indicus	Kenya	Recent	Olivier Hanotte / Abdulfatai Tijjani	Modern	2.23	42584534	42459253	42423762	6161211562	6158311541	11930883	6542.18	254	15.476	207165	45.8	0.67	43.15	2.233	99.7058
Mashona	MASH	MASH	MASH16	AFS	African Sanga	Bos taurus/Bos indicus hybrid	South Africa	2022	University of Pretoria	Modern	2.23	62875920	62740721	62707848	6153351258	6150881649	10391516	55697.4	105	13.7772	76415	48.71	0.66	40.18	2.2302	99.785
Nguni	NGUN	NGUN	NGUN24	AFS	African Sanga	Bos taurus/Bos indicus hybrid	South Africa	2022	University of Pretoria	Modern	2.23	57624276	57530671	57500888	6149694252	6147053440	7593869	30658.2	117	14.0966	79275	46.71	0.66	42.01	2.2288	99.8376
Muturu_Nigeria_1990s	MUTT	MUTT	MUTT12	AFT	African taurine	Bos taurus	Nigeria	1992	Previously part of microsatellite study	Modern	2.22	49314330	49249974	49215682	6119793282	6117232522	5632073	11893.7	160	14.6377	68933	46.15	0.65	41.06	2.218	99.8695
Nguni	NGUN	NGUN	NGUN49	AFS	African Sanga	Bos taurus/Bos indicus hybrid	South Africa	2022	University of Pretoria	Modern	2.21	58066370	58006016	57978136	6086089167	6083552101	8528719	28605	115	13.8489	80257	46.3	0.6	42.98	2.2058	99.8961
NDama_Guinea_1990s	NDAG	NDAG	NDAG56	AFT	African taurine	Bos taurus	Guinea	1992	Previously part of microsatellite study	Modern	2.2	47662634	47572688	47514996	6056981992	6054661444	6237087	11917.6	176	14.7385	67339	45.38	0.7	42.58	2.1952	99.8113
Zebu_Gobra	ZEBG	ZEBG	ZEBG26	AFS	African Sanga	Bos indicus	Senegal	1992	Previously part of microsatellite study	Modern	2.2	48537336	48468378	48423618	6077067812	6073539782	4911948	13204.4	175	14.4615	27617	45.17	0.84	41.42	2.2025	99.8579
Zebu_Gobra	ZEBG	ZEBG	ZEBG33	AFS	African Sanga	Bos indicus	Senegal	1992	Previously part of microsatellite study	Modern	2.19	48464990	48422586	48399662	6050463810	6046908964	4849928	14362.2	167	14.488	24682	45.38	0.85	40.82	2.1929	99.9125
NDama_Gambia_1990s	NDGT	NDGM	NDGM07	AFT	African taurine	Bos taurus	Gambia	1992	Previously part of microsatellite study	Modern	2.18	48081904	47998201	47944908	6012608963	6010062993	4693258	12093	171	14.5857	26364	45.61	0.68	41.81	2.1791	99.8259
NDama_Guinea_1990s	NDAG	NDAG	NDAG29	AFT	African taurine	Bos taurus	Guinea	1992	Previously part of microsatellite study	Modern	2.18	48661106	48606442	48573312	6015604989	6013309982	5896907	12556.9	167	14.5183	66666	45.81	0.72	42.08	2.1802	99.8877
Tuli	TULI	TULI	TULI13	SAC	South African Composite	Bos taurus/Bos indicus hybrid	South Africa	2022	University of Pretoria	Modern	2.18	50962284	50908175	50885390	6028298677	6025749403	6735118	16890.5	140	14.4194	76643	45.85	0.67	42.53	2.1848	99.8938
Tuli	TULI	TULI	TULI23	SAC	South African Composite	Bos taurus/Bos indicus hybrid	South Africa	2022	University of Pretoria	Modern	2.18	53742524	53637539	53612594	6019210762	6016718247	6402706	16381.6	122	14.4834	74959	46.46	0.65	41.91	2.1815	99.8047
NDama_Guinea_1990s	NDAG	NDAG	NDAG25	AFT	African taurine	Bos taurus	Guinea	1992	Previously part of microsatellite study	Modern	2.17	47819870	47744416	47703906	5986206204	5983833583	6109728	11822.3	175	14.9218	66852	45.69	0.68	42.05	2.1696	99.8422
NDama_Guinea_1990s	NDAG	NDAG	NDAG31	AFT	African taurine	Bos taurus	Guinea	1992	Previously part of microsatellite study	Modern	2.17	47999974	47928098	47892544	5975370045	5973073912	6310750	14166.2	170	14.5893	67142	45.8	0.65	42.34	2.1657	99.8503
Sokoto_Gudali	SOKO	SOKO	SOKO39	AFS	African Sanga	Bos indicus	Nigeria	1992	Previously part of microsatellite study	Modern	2.17	45723658	45610884	45529758	6000263209	5996456373	4871637	10134.9	191	14.7784	38004	44.86	0.99	41.19	2.1747	99.7534
Sokoto_Gudali	SOKO	SOKO	SOKO18	AFS	African Sanga	Bos indicus	Nigeria	1992	Previously part of microsatellite study	Modern	2.17	47467648	47386758	47334898	5995582786	5991924446	5642245	13012.6	181	14.4783	68156	45.12	0.93	41.2	2.173	99.8296
Zebu_Gobra	ZEBG	ZEBG	ZEBG02	AFS	African Sanga	Bos indicus	Senegal	1992	Previously part of microsatellite study	Modern	2.17	48661704	48585957	48535886	5994374344	5990869977	4963099	15885.6	163	14.3332	26959	46.09	0.86	40.66	2.1725	99.8443
Borgou	BORG	BORG	BORG36	AFS	African Sanga	Bos taurus/Bos indicus hybrid	Benin	1992	Previously part of microsatellite study	Modern	2.16	44610914	44561985	44532712	5946203273	5942991171	6208470	8890.87	203	14.9244	143013	45.12	0.78	42.09	2.1551	99.8903
Sokoto_Gudali	SOKO	SOKO	SOKO08	AFS	African Sanga	Bos indicus	Nigeria	1992	Previously part of microsatellite study	Modern	2.16	47375828	47309959	47272732	5949320445	5945703431	5573404	15301.5	177	14.3939	66905	44.94	0.89	42.15	2.1562	99.861
Tuli	TULI	TULI	TULI33	SAC	South African Composite	Bos taurus/Bos indicus hybrid	South Africa	2022	University of Pretoria	Modern	2.16	51066404	51017176	50995928	5972395539	5969852672	6906612	17740.6	139	14.2806	79375	45.39	0.62	43.12	2.1646	99.9036
Tuli	TULI	TULI	TULI45	SAC	South African Composite	Bos taurus/Bos indicus hybrid	South Africa	2022	University of Pretoria	Modern	2.16	50973400	50919712	50898472	5958498404	5955886262	5802095	14973.7	135	14.3548	76292	45.38	0.62	42.73	2.1595	99.8947
Borgou	BORG	BORG	BORG25	AFS	African Sanga	Bos taurus/Bos indicus hybrid	Benin	1992	Previously part of microsatellite study	Modern	2.15	44412846	44352827	44318902	5937884249	5934524504	5819584	11298.4	212	14.9081	152926	44.95	0.88	40.51	2.1521	99.8649
Kuri	KRIT	KURI	KURI11	AFT	African taurine	Bos taurus	Chad	1992	Previously part of microsatellite study	Modern	2.14	47237084	46867707	46835984	5902455659	5899200000	6140517	11579.6	167	15.4375	151439	44.82	0.8	41.23	2.1392	99.218
NDama_Guinea_1990s	NDAG	NDAG	NDAG26	AFT	African taurine	Bos taurus	Guinea	1992	Previously part of microsatellite study	Modern	2.14	46893740	46851282	46825604	5897792161	5895460427	6099608	12256.9	179	14.6453	63295	45.72	0.75	41.86	2.1375	99.9095
Sokoto_Gudali	SOKO	SOKO	SOKO05	AFS	African Sanga	Bos indicus	Nigeria	1992	Previously part of microsatellite study	Modern	2.14	46223854	46143128	46096844	5911501109	5907772388	5677539	14191.3	188	14.6884	66908	44.98	0.9	41.26	2.1425	99.8254
Mashona	MASH	MASH	MASH17	AFS	African Sanga	Bos taurus/Bos indicus hybrid	South Africa	2022	University of Pretoria	Modern	2.14	59254836	59142987	59080846	5911777633	5909197339	11283167	97197.9	116	13.7831	73959	48.81	0.79	37.93	2.1426	99.8112
East_African_Short_Zebu	EASZ	EASZ	EASZ049	AZE	African Indicine Composite	Bos indicus	Kenya	Recent	Olivier Hanotte / Abdulfatai Tijjani	Modern	2.12	40814624	40652163	40618402	5853566008	5849712526	10069917	9029.68	246	14.9356	201303	45.95	0.86	42.02	2.1215	99.602
NDama_Guinea_1990s	NDAG	NDAG	NDAG16	AFT	African taurine	Bos taurus	Guinea	1992	Previously part of microsatellite study	Modern	2.12	46912882	46866251	46837692	5859147182	5856901847	5756300	11444.7	170	14.637	65607	45.51	0.63	42.53	2.1235	99.9006
Zebu_Maure	ZBMT	ZBMA	ZBMA30	AFS	African Sanga	Bos indicus	Mauritania	1992	Previously part of microsatellite study	Modern	2.12	53270702	53178602	53128006	5843293453	5840201729	5247131	22526.6	120	14.2268	24233	45.87	0.78	42.14	2.1178	99.8271
Zebu_Peul	ZEBP	ZEBP	ZEBP05	AFS	African Sanga	Bos indicus	Burkina Faso	1992	Previously part of microsatellite study	Modern	2.12	47075116	47021574	46986926	5839174698	5835903868	4580954	16449	159	14.4382	25637	46.6	0.84	41.78	2.1163	99.8863
Mashona	MASH	MASH	MASH15	AFS	African Sanga	Bos taurus/Bos indicus hybrid	South Africa	2022	University of Pretoria	Modern	2.11	53388176	53255557	53227052	5826424342	5823757785	6814852	20704.2	118	14.36	72085	47.1	0.71	40.65	2.1117	99.7516
Muturu_Nigeria_1990s	MUTT	MUTT	MUTT24	AFT	African taurine	Bos taurus	Nigeria	1992	Previously part of microsatellite study	Modern	2.11	46247384	46193374	46158330	5823873030	5821604071	5718065	9579.16	166	14.6361	64818	45.67	0.63	42.45	2.1107	99.8832
Mashona	MASH	MASH	MASH20	AFS	African Sanga	Bos taurus/Bos indicus hybrid	South Africa	2022	University of Pretoria	Modern	2.1	63554788	63392365	63353054	5802729963	5800488952	11304741	51524.6	94	13.8747	76207	49.18	0.6	40.13	2.1031	99.7444
Muturu_Nigeria_1990s	MUTT	MUTT	MUTT04	AFT	African taurine	Bos taurus	Nigeria	1992	Previously part of microsatellite study	Modern	2.1	47801198	47753735	47726786	5780792981	5777641207	6095526	15508	152	14.4774	64533	45.85	0.81	40.5	2.0951	99.9007
NDama_Gambia_1990s	NDGT	NDGM	NDGM10	AFT	African taurine	Bos taurus	Gambia	1992	Previously part of microsatellite study	Modern	2.1	46499222	46430920	46389676	5791256296	5788751773	3957137	13195.3	164	14.5781	24053	45.45	0.75	42.14	2.0989	99.8531
Sokoto_Gudali	SOKO	SOKO	SOKO11	AFS	African Sanga	Bos indicus	Nigeria	1992	Previously part of microsatellite study	Modern	2.1	46310464	46250419	46209662	5795856709	5792251138	5484327	14616.4	173	14.5127	64584	45.39	0.9	40.84	2.1006	99.8703
East_African_Short_Zebu	EASZ	EASZ	EASZ117	AZE	African Indicine Composite	Bos indicus	Kenya	Recent	Olivier Hanotte / Abdulfatai Tijjani	Modern	2.09	40254662	40085107	40047754	5769070425	5765388898	9791150	9861.73	254	15.1649	194763	46.62	0.9	42.42	2.0909	99.5788
Kenana	KNAT	KENA	KENA28	AFI	African Indicine	Bos indicus	South Sudan	1990	Previously part of microsatellite study	Modern	2.09	56546836	56308008	56263592	5775427669	5772368439	8264621	25967	113	14.5402	27167	48.47	0.73	40.53	2.0932	99.5776
Muturu_Nigeria_1990s	MUTT	MUTT	MUTT06	AFT	African taurine	Bos taurus	Nigeria	1992	Previously part of microsatellite study	Modern	2.09	45284736	45229208	45202680	5766633952	5764171639	5637184	10638.6	166	14.7727	62785	45.61	0.66	41.07	2.09	99.8774
East_African_Short_Zebu	EASZ	EASZ	EASZ046	AZE	African Indicine Composite	Bos indicus	Kenya	Recent	Olivier Hanotte / Abdulfatai Tijjani	Modern	2.08	40517994	39945471	39905164	5737547553	5734208675	9810350	8712.88	245	15.8694	191689	46.8	0.86	41.78	2.0795	98.587
Mashona	MASH	MASH	MASH21	AFS	African Sanga	Bos taurus/Bos indicus hybrid	South Africa	2022	University of Pretoria	Modern	2.08	53282158	53042921	53011704	5745697475	5743084441	7117070	25525.2	118	14.8796	72590	47.45	0.72	40.81	2.0824	99.551
Butana	BUTA	BUTA	BUTA32	AFI	African Indicine	Bos indicus	Sudan	1992	Previously part of microsatellite study	Modern	2.08	47513922	47432127	47384634	5730601655	5727023233	4589861	16705.6	158	14.4031	25145	44.79	0.87	43.11	2.0769	99.8279
Kapsiki	KAPS	KAPS	KAPS33	AFT	African taurine	Bos taurus	Cameroon	1992	Previously part of microsatellite study	Modern	2.08	50437018	50380102	50348676	5752463522	5749041398	7962993	20998.1	133	14.1299	12878	46.33	0.79	37.41	2.0849	99.8872
Sokoto_Gudali	SOKO	SOKO	SOKO20	AFS	African Sanga	Bos indicus	Nigeria	1992	Previously part of microsatellite study	Modern	2.08	45387896	45325494	45293296	5750236848	5746654194	5095523	12015.1	179	14.5331	63067	44.95	0.94	41.03	2.0841	99.8625
Nguni	NGUN	NGUN	NGUN51	AFS	African Sanga	Bos taurus/Bos indicus hybrid	South Africa	2022	University of Pretoria	Modern	2.08	51507708	51440639	51407510	5745621264	5743166875	6194664	31781.8	126	14.024	73066	46.45	0.7	41.8	2.0824	99.8698
Tuli	TULI	TULI	TULI28	SAC	South African Composite	Bos taurus/Bos indicus hybrid	South Africa	2022	University of Pretoria	Modern	2.08	54119506	53987803	53956570	5737269722	5735057794	8186518	49677.2	121	14.4723	73701	47.1	0.62	41.91	2.0794	99.7566
NDama_Guinea_1990s	NDAG	NDAG	NDAG60	AFT	African taurine	Bos taurus	Guinea	1992	Previously part of microsatellite study	Modern	2.07	45450070	45383070	45348828	5707263640	5704950617	5608156	13106.4	172	14.7321	64855	45.48	0.65	41.49	2.0685	99.8526
Zebu_Gobra	ZEBG	ZEBG	ZEBG31	AFS	African Sanga	Bos indicus	Senegal	1992	Previously part of microsatellite study	Modern	2.07	45676052	45606386	45561248	5708561356	5705140741	4648354	12559.4	170	14.5571	26051	45.18	0.84	40.63	2.069	99.8475
Zebu_Maure	ZBMT	ZBMA	ZBMA22	AFS	African Sanga	Bos indicus	Mauritania	1992	Previously part of microsatellite study	Modern	2.07	47851004	47816173	47797488	5718774016	5715688320	4510267	14699.5	145	14.3707	21948	45.33	0.81	41.67	2.0727	99.9272
Nguni	NGUN	NGUN	NGUN50	AFS	African Sanga	Bos taurus/Bos indicus hybrid	South Africa	2022	University of Pretoria	Modern	2.07	53110932	53052808	53024370	5713335397	5710889195	6888275	36756	119	13.8235	73220	46.45	0.64	42.41	2.0707	99.8906
Tuli	TULI	TULI	TULI25	SAC	South African Composite	Bos taurus/Bos indicus hybrid	South Africa	2022	University of Pretoria	Modern	2.07	50367844	50325638	50304436	5707279851	5704947453	6622649	24311.8	129	14.1314	73504	46.62	0.62	42.05	2.0685	99.9162
Mbororo	MBOR	MBOR	MBOR43	AFS	African Sanga	Bos taurus/Bos indicus hybrid	Nigeria	1992	Previously part of microsatellite study	Modern	2.06	45894918	45831189	45785870	5695540106	5692206459	5394216	18952.8	166	14.0129	24842	49.78	1.07	37.48	2.0642	99.8611
Borgou	BORG	BORG	BORG39	AFS	African Sanga	Bos taurus/Bos indicus hybrid	Benin	1992	Previously part of microsatellite study	Modern	2.05	42031370	41941713	41871368	5661206892	5658213770	5470025	9612.93	225	14.9331	144565	44.75	0.85	41.93	2.0518	99.7867
Borgou	BORG	BORG	BORG51	AFS	African Sanga	Bos taurus/Bos indicus hybrid	Benin	1992	Previously part of microsatellite study	Modern	2.05	44480710	44216151	44181818	5655221618	5652290698	5864957	13015.5	182	15.373	146506	44.95	0.72	41.85	2.0496	99.4052
Kapsiki	KAPS	KAPS	KAPS36	AFT	African taurine	Bos taurus	Cameroon	1992	Previously part of microsatellite study	Modern	2.05	47381004	47336036	47314626	5660272395	5656796515	7089910	19125.4	148	14.2731	8486	46.02	0.91	37.03	2.0515	99.9051
Namchi	NAMC	NAMC	NAMC14	AFT	African taurine	Bos taurus	Cameroon	1992	Previously part of microsatellite study	Modern	2.05	46770654	46689040	46633248	5655844375	5653284852	5978543	17016.5	148	14.3163	35620	46.27	0.77	40.51	2.0498	99.8255
NDama_Guinea_1990s	NDAG	NDAG	NDAG48	AFT	African taurine	Bos taurus	Guinea	1992	Previously part of microsatellite study	Modern	2.05	43557910	43511028	43485246	5649231316	5647000833	4623409	8848.24	173	14.8279	62534	45.62	0.63	42.57	2.0475	99.8924
Nguni	NGUN	NGUN	NGUN23	AFS	African Sanga	Bos taurus/Bos indicus hybrid	South Africa	2022	University of Pretoria	Modern	2.05	70333620	64920637	64704300	5643055210	5640908782	11645533	32158	92	15.1074	65710	47.54	0.65	41.23	2.0452	92.3038
Nguni	NGUN	NGUN	NGUN25	AFS	African Sanga	Bos taurus/Bos indicus hybrid	South Africa	2022	University of Pretoria	Modern	2.05	52851518	52798149	52771484	5668358308	5665900059	7370864	27782.5	119	13.8659	73652	46.58	0.65	41.77	2.0544	99.899
Borgou	BORG	BORG	BORG16	AFS	African Sanga	Bos taurus/Bos indicus hybrid	Benin	1992	Previously part of microsatellite study	Modern	2.04	41952152	41852363	41787448	5629944768	5626891922	5404416	9623.7	225	14.8171	147297	44.84	0.86	41.34	2.0405	99.7621
NDama_Gambia_1990s	NDGT	NDGM	NDGM08	AFT	African taurine	Bos taurus	Gambia	1992	Previously part of microsatellite study	Modern	2.04	47487248	47434927	47401284	5625310074	5622982297	4567480	14176	141	14.4102	24867	46.19	0.63	41.72	2.0388	99.8898
Tuli	TULI	TULI	TULI38	SAC	South African Composite	Bos taurus/Bos indicus hybrid	South Africa	2022	University of Pretoria	Modern	2.04	49983360	49930597	49910018	5624651372	5622334007	6693540	20670	128	14.2392	72493	46	0.64	42.53	2.0385	99.8944
Muturu_Nigeria_1990s	MUTT	MUTT	MUTT03	AFT	African taurine	Bos taurus	Nigeria	1992	Previously part of microsatellite study	Modern	2.03	44947274	44881941	44855452	5599649388	5596553722	4859073	14486.1	164	14.7372	56704	46.14	1.01	40.26	2.0295	99.8546
NDama_Guinea_1990s	NDAG	NDAG	NDAG23	AFT	African taurine	Bos taurus	Guinea	1992	Previously part of microsatellite study	Modern	2.03	43972184	43888823	43834178	5600810679	5598617908	4996831	12115.8	188	14.7275	62270	45.91	0.74	42.1	2.0299	99.8104
Zebu_Gobra	ZEBG	ZEBG	ZEBG36	AFS	African Sanga	Bos indicus	Senegal	1992	Previously part of microsatellite study	Modern	2.03	45197264	45146026	45111478	5611008775	5607809433	4818716	12993.8	167	14.3443	25823	45.47	0.77	41.22	2.0336	99.8866
Zebu_Peul	ZEBP	ZEBP	ZEBP16	AFS	African Sanga	Bos indicus	Burkina Faso	1992	Previously part of microsatellite study	Modern	2.03	44668566	44606042	44564304	5607959757	5604618993	3977607	15653	171	14.5089	24376	45.68	0.89	41.51	2.0325	99.86
Kapsiki	KAPS	KAPS	KAPS23	AFT	African taurine	Bos taurus	Cameroon	1992	Previously part of microsatellite study	Modern	2.02	49285144	49232854	49203102	5578034330	5575070176	8007042	19613.4	130	13.9888	12684	46.69	0.72	35.92	2.0216	99.8939
Baoule_BurkinaFaso_1990s	BBFT	BBFT	BBFT25	AFT	African taurine	Bos taurus	Burkina Faso	1992	Previously part of microsatellite study	Modern	2.01	47970920	47920462	47886288	5539150315	5537218352	5293336	21915.4	136	13.9432	24880	48.38	0.59	40.9	2.0076	99.8948
Sokoto_Gudali	SOKO	SOKO	SOKO41	AFS	African Sanga	Bos indicus	Nigeria	1992	Previously part of microsatellite study	Modern	2.01	41970868	41870325	41824452	5538558613	5535202555	4206179	8929.92	190	14.8104	33758	44.87	0.98	41.42	2.0073	99.7604
Sokoto_Gudali	SOKO	SOKO	SOKO04	AFS	African Sanga	Bos indicus	Nigeria	1992	Previously part of microsatellite study	Modern	2.01	39527908	39413557	39338458	5544844961	5541361830	4295609	9481.51	245	14.9908	51391	44.49	1.63	41.19	2.0096	99.7107
Watusi	WATU	WATU	WATU05	AFS	African Sanga	Bos taurus/Bos indicus hybrid	Rwanda	2000	Previously part of microsatellite study	Modern	2.01	53655624	53594261	53564576	5532448144	5529991442	5722440	78354	113	13.8578	516589	47.54	0.65	40.16	2.0051	99.8856
Borgou	BORG	BORG	BORG15	AFS	African Sanga	Bos taurus/Bos indicus hybrid	Benin	1992	Previously part of microsatellite study	Modern	2	41380878	41326042	41288026	5525698686	5522730828	5076629	9269.12	214	14.9175	142987	44.89	0.8	41.95	2.0027	99.8675
East_African_Short_Zebu	EASZ	EASZ	EASZ098	AZE	African Indicine Composite	Bos indicus	Kenya	Recent	Olivier Hanotte / Abdulfatai Tijjani	Modern	1.99	38250044	38095512	38062260	5501881403	5498787479	9919569	10164.3	260	15.2911	184876	45.91	0.81	42.1	1.994	99.596
Fogera	FOGE	FOGE	FOGE13	AFI	African Indicine	Bos taurus/Bos indicus hybrid	Ethiopia	1992	Previously part of microsatellite study	Modern	1.99	51931296	51876281	51849010	5498476232	5495468528	5869329	36314	117	13.8794	515320	46.72	0.72	41.74	1.9928	99.8941
NDama_Guinea_1990s	NDAG	NDAG	NDAG27	AFT	African taurine	Bos taurus	Guinea	1992	Previously part of microsatellite study	Modern	1.99	44395212	44350302	44328232	5497879134	5495813372	5346888	12195.3	168	14.7355	60420	45.84	0.66	42.68	1.9926	99.8988
NDama_Guinea_1990s	NDAG	NDAG	NDAG28	AFT	African taurine	Bos taurus	Guinea	1992	Previously part of microsatellite study	Modern	1.99	44268704	44202406	44167106	5495988996	5493854228	5432217	11574.8	166	14.7369	61994	45.67	0.64	42.19	1.9919	99.8502
East_African_Short_Zebu	EASZ	EASZ	EASZ231	AZE	African Indicine Composite	Bos indicus	Kenya	Recent	Olivier Hanotte / Abdulfatai Tijjani	Modern	1.98	38759680	38591558	38557514	5474700808	5471370858	12067193	8890.91	222	15.1446	192584	48.36	0.91	40.45	1.9842	99.5662
Kapsiki	KAPS	KAPS	KAPS51	AFT	African taurine	Bos taurus	Nigeria	1992	Previously part of microsatellite study	Modern	1.98	42731806	42675503	42638560	5476349425	5473340793	4969504	10809.6	185	14.6036	131884	45.24	0.97	40.49	1.9848	99.8682
Kuri	KRIT	KURI	KURI15	AFT	African taurine	Bos taurus	Chad	1992	Previously part of microsatellite study	Modern	1.98	42769468	42661152	42627750	5457755693	5455102048	6085541	30824.9	177	13.9763	141196	49.23	0.94	39.64	1.9781	99.7467
Zebu_Gobra	ZEBG	ZEBG	ZEBG14	AFS	African Sanga	Bos indicus	Senegal	1992	Previously part of microsatellite study	Modern	1.98	43003848	42940126	42898368	5454217978	5450975019	4532974	13106.8	178	14.5325	24110	45.23	0.88	40.27	1.9768	99.8518
Sokoto_Gudali	SOKO	SOKO	SOKO24	AFS	African Sanga	Bos indicus	Nigeria	1992	Previously part of microsatellite study	Modern	1.97	42927116	42858077	42813274	5429251148	5425735452	4821982	12228.7	177	14.5305	34576	44.78	0.94	40.31	1.9677	99.8392
Nguni	NGUN	NGUN	NGUN19	AFS	African Sanga	Bos taurus/Bos indicus hybrid	South Africa	2022	University of Pretoria	Modern	1.97	47420284	47359412	47338356	5431091873	5428935311	4959431	25190.1	127	13.7072	66226	45.31	0.68	43.19	1.9684	99.8716
Tuli	TULI	TULI	TULI26	SAC	South African Composite	Bos taurus/Bos indicus hybrid	South Africa	2022	University of Pretoria	Modern	1.97	49669524	49625229	49606796	5430568248	5428298333	6672709	22651.7	122	14.1755	68992	46.47	0.65	42.35	1.9682	99.9108
East_African_Short_Zebu	EASZ	EASZ	EASZ164	AZE	African Indicine Composite	Bos indicus	Kenya	Recent	Olivier Hanotte / Abdulfatai Tijjani	Modern	1.95	37833908	37691758	37662596	5375751878	5372069437	10602798	7553.1	228	14.8745	188684	47.17	0.97	41.06	1.9483	99.6243
East_African_Short_Zebu	EASZ	EASZ	EASZ016	AZE	African Indicine Composite	Bos indicus	Kenya	Recent	Olivier Hanotte / Abdulfatai Tijjani	Modern	1.95	37332956	37202053	37162756	5371564823	5368124466	11082727	7384.66	255	15.1139	191483	49.35	0.99	39.88	1.9468	99.6494
East_African_Short_Zebu	EASZ	EASZ	EASZ135	AZE	African Indicine Composite	Bos indicus	Kenya	Recent	Olivier Hanotte / Abdulfatai Tijjani	Modern	1.95	37654858	37543597	37517108	5386053726	5383139618	10769271	6962.09	230	15.3531	193713	47.67	0.84	41.06	1.9521	99.7045
Mashona	MASH	MASH	MASH14	AFS	African Sanga	Bos taurus/Bos indicus hybrid	South Africa	2022	University of Pretoria	Modern	1.95	47902330	47779148	47754350	5383377968	5380932442	5246740	22782.4	123	14.5943	67393	46.58	0.71	41.12	1.9511	99.7428
Borgou	BORG	BORG	BORG32	AFS	African Sanga	Bos taurus/Bos indicus hybrid	Benin	1992	Previously part of microsatellite study	Modern	1.95	41331382	41280960	41251704	5391346868	5388481103	5384546	9238.1	192	14.8016	138534	44.99	0.76	41.37	1.954	99.878
Somba	SOMB	SOMB	SOMB12	AFT	African taurine	Bos taurus	Togo	1992	Previously part of microsatellite study	Modern	1.95	43847448	43807739	43789156	5388424633	5386153781	8439461	14566.9	161	14.5132	257251	45.22	0.56	42.52	1.9529	99.9094
Tuli	TULI	TULI	TULI14	SAC	South African Composite	Bos taurus/Bos indicus hybrid	South Africa	2022	University of Pretoria	Modern	1.95	50360206	50260611	50233590	5374996974	5372855469	6981188	23294.2	117	14.3779	70387	46.91	0.63	41.84	1.9481	99.8022
East_African_Short_Zebu	EASZ	EASZ	EASZ139	AZE	African Indicine Composite	Bos indicus	Kenya	Recent	Olivier Hanotte / Abdulfatai Tijjani	Modern	1.94	37458656	37321104	37294784	5349441004	5346540989	10836673	8455.71	231	15.2788	185426	48.14	0.82	40.74	1.9388	99.6328
Borgou	BORG	BORG	BORG46	AFS	African Sanga	Bos taurus/Bos indicus hybrid	Benin	1992	Previously part of microsatellite study	Modern	1.94	40146740	40099835	40074934	5355006812	5352196215	5247818	11060.8	208	15.0467	136535	44.7	0.79	42	1.9408	99.8832
Muturu_Nigeria_1990s	MUTT	MUTT	MUTT05	AFT	African taurine	Bos taurus	Nigeria	1992	Previously part of microsatellite study	Modern	1.94	41826438	41777382	41750764	5354690874	5351959120	4800392	11325.1	174	14.6843	58621	45.42	0.85	40.94	1.9407	99.8827
Tuli	TULI	TULI	TULI37	SAC	South African Composite	Bos taurus/Bos indicus hybrid	South Africa	2022	University of Pretoria	Modern	1.94	50386382	50271955	50248790	5358149636	5355903204	6460520	28123.6	113	14.4072	67024	46.99	0.67	41.24	1.942	99.7729
East_African_Short_Zebu	EASZ	EASZ	EASZ240	AZE	African Indicine Composite	Bos indicus	Kenya	Recent	Olivier Hanotte / Abdulfatai Tijjani	Modern	1.93	37355698	37142914	37103964	5315533421	5312353879	11182979	9884.94	235	15.1211	185861	48.84	1	41.19	1.9265	99.4304
Borgou	BORG	BORG	BORG34	AFS	African Sanga	Bos taurus/Bos indicus hybrid	Benin	1992	Previously part of microsatellite study	Modern	1.93	39148860	39113279	39090640	5328894129	5326036560	4739278	7340.94	209	14.9051	139118	44.24	0.73	42.45	1.9314	99.9091
Borgou	BORG	BORG	BORG37	AFS	African Sanga	Bos taurus/Bos indicus hybrid	Benin	1992	Previously part of microsatellite study	Modern	1.93	40745092	40690923	40655466	5334505379	5331677709	5381194	10146.8	192	14.7589	137903	44.48	0.75	42.74	1.9334	99.8671
Tuli	TULI	TULI	TULI17	SAC	South African Composite	Bos taurus/Bos indicus hybrid	South Africa	2022	University of Pretoria	Modern	1.93	48538438	48480490	48455014	5332835299	5330694684	6863426	27390.7	125	14.069	67699	46.96	0.64	41.78	1.9328	99.8806
East_African_Short_Zebu	EASZ	EASZ	EASZ154	AZE	African Indicine Composite	Bos indicus	Kenya	Recent	Olivier Hanotte / Abdulfatai Tijjani	Modern	1.92	36778512	36643339	36605524	5299556535	5296287164	10673922	10043.4	258	15.1203	189185	46.29	0.89	41.81	1.9207	99.6325
East_African_Short_Zebu	EASZ	EASZ	EASZ122	AZE	African Indicine Composite	Bos indicus	Kenya	Recent	Olivier Hanotte / Abdulfatai Tijjani	Modern	1.92	36925662	36801467	36772588	5291578811	5289068569	9294265	7796.76	240	15.504	181381	48.49	0.7	41.81	1.9178	99.6637
Mbororo	MBOR	MBOR	MBOR10	AFS	African Sanga	Bos taurus/Bos indicus hybrid	Nigeria	1992	Previously part of microsatellite study	Modern	1.92	46928716	46869078	46829966	5296305637	5293306570	5202604	22167.8	131	13.7987	22607	47.01	0.87	38.69	1.9195	99.8729
Namchi	NAMC	NAMC	NAMC35	AFT	African taurine	Bos taurus	Cameroon	1992	Previously part of microsatellite study	Modern	1.92	45595134	45519839	45463648	5299536169	5297062950	5310751	15598.8	135	14.229	34104	45.86	0.68	40.54	1.9207	99.8349
Borgou	BORG	BORG	BORG38	AFS	African Sanga	Bos taurus/Bos indicus hybrid	Benin	1992	Previously part of microsatellite study	Modern	1.91	39521486	39462420	39418986	5262586293	5259701415	4811968	9727.56	208	14.761	137231	44.75	0.81	41.92	1.9073	99.8505
Tuli	TULI	TULI	TULI19	SAC	South African Composite	Bos taurus/Bos indicus hybrid	South Africa	2022	University of Pretoria	Modern	1.91	46243552	46194562	46172496	5272034649	5269847774	6002022	21565.7	132	14.3039	68603	46.24	0.65	42.35	1.9107	99.8941
Tuli	TULI	TULI	TULI22	SAC	South African Composite	Bos taurus/Bos indicus hybrid	South Africa	2022	University of Pretoria	Modern	1.91	43389292	43337835	43318548	5264869849	5262747649	6121142	18181.5	158	14.6929	67729	45.49	0.66	43.18	1.9081	99.8814
East_African_Short_Zebu	EASZ	EASZ	EASZ206	AZE	African Indicine Composite	Bos indicus	Kenya	Recent	Olivier Hanotte / Abdulfatai Tijjani	Modern	1.9	36579008	36433231	36401916	5242989698	5239592623	11570992	10196.3	249	14.9686	188435	46.72	0.93	41.74	1.9002	99.6015
Butana	BUTA	BUTA	BUTA30	AFI	African Indicine	Bos indicus	Sudan	1992	Previously part of microsatellite study	Modern	1.9	45068846	45005549	44970490	5245799066	5242688035	3852154	18232.1	139	14.2033	22156	45.18	0.81	42.26	1.9012	99.8596
Muturu_Nigeria_1990s	MUTT	MUTT	MUTT09	AFT	African taurine	Bos taurus	Nigeria	1992	Previously part of microsatellite study	Modern	1.9	42792866	42733542	42703348	5242911809	5240754012	5087908	13618.3	159	14.5253	59004	45.87	0.62	41.26	1.9002	99.8614
Tuli	TULI	TULI	TULI11	SAC	South African Composite	Bos taurus/Bos indicus hybrid	South Africa	2022	University of Pretoria	Modern	1.9	48744346	48353230	48333606	5254333036	5251633918	5918722	15043	117	14.7035	64704	45.84	0.64	40.52	1.9043	99.1976
East_African_Short_Zebu	EASZ	EASZ	EASZ178	AZE	African Indicine Composite	Bos indicus	Kenya	Recent	Olivier Hanotte / Abdulfatai Tijjani	Modern	1.89	36418252	36303080	36276026	5228210548	5225842975	10493618	7023.13	237	15.3804	188530	46.49	0.64	43.09	1.8949	99.6838
East_African_Short_Zebu	EASZ	EASZ	EASZ039	AZE	African Indicine Composite	Bos indicus	Kenya	Recent	Olivier Hanotte / Abdulfatai Tijjani	Modern	1.89	36360386	36217206	36184996	5217423620	5214174038	8726997	9781.04	250	15.1163	176273	46.2	0.87	41.99	1.891	99.6062
Borgou	BORG	BORG	BORG40	AFS	African Sanga	Bos taurus/Bos indicus hybrid	Benin	1992	Previously part of microsatellite study	Modern	1.88	38408476	38343956	38299444	5178822330	5175998831	5873123	11301.7	219	14.8752	132231	44.53	0.83	41.96	1.877	99.832
Kapsiki	KAPS	KAPS	KAPS09	AFT	African taurine	Bos taurus	Cameroon	1992	Previously part of microsatellite study	Modern	1.88	50370484	50318597	50289518	5193268297	5190674365	9033229	29301.5	110	13.5807	11105	48.64	0.73	35.39	1.8822	99.897
Mbororo	MBOR	MBOR	MBOR35	AFS	African Sanga	Bos taurus/Bos indicus hybrid	Nigeria	1992	Previously part of microsatellite study	Modern	1.88	43688982	43641639	43612472	5189597593	5186592533	4265704	14932	144	14.2391	23606	46.07	0.85	40.14	1.8809	99.8916
Zebu_Gobra	ZEBG	ZEBG	ZEBG39	AFS	African Sanga	Bos indicus	Senegal	1992	Previously part of microsatellite study	Modern	1.88	41350454	41310491	41288016	5190816639	5187754208	4007138	12116.9	170	14.4452	23012	45.02	0.79	41.2	1.8813	99.9034
East_African_Short_Zebu	EASZ	EASZ	EASZ015	AZE	African Indicine Composite	Bos indicus	Kenya	Recent	Olivier Hanotte / Abdulfatai Tijjani	Modern	1.87	36247248	36119919	36090892	5150773392	5148228587	10910176	8163.8	225	15.1543	181481	46.9	0.71	42.16	1.8668	99.6487
Mbororo	MBOR	MBOR	MBOR06	AFS	African Sanga	Bos taurus/Bos indicus hybrid	Nigeria	1992	Previously part of microsatellite study	Modern	1.87	46468072	46401183	46357084	5167694152	5164489421	4663661	18500.5	122	13.9717	20651	46.59	0.89	37.98	1.8729	99.8561
Tuli	TULI	TULI	TULI31	SAC	South African Composite	Bos taurus/Bos indicus hybrid	South Africa	2022	University of Pretoria	Modern	1.87	46360858	46307393	46285646	5171568582	5169447982	5928307	25015.6	126	14.1836	66232	46.37	0.64	42.31	1.8743	99.8847
East_African_Short_Zebu	EASZ	EASZ	EASZ161	AZE	African Indicine Composite	Bos indicus	Kenya	Recent	Olivier Hanotte / Abdulfatai Tijjani	Modern	1.86	36300976	36144116	36115092	5119631424	5116244799	11132975	9136.6	216	14.9533	178949	47.73	0.97	40.57	1.8555	99.5679
Muturu_Nigeria_1990s	MUTT	MUTT	MUTT08	AFT	African taurine	Bos taurus	Nigeria	1992	Previously part of microsatellite study	Modern	1.86	41879876	41832038	41803114	5121157938	5119064918	5508478	13320.6	155	14.588	56275	46.11	0.66	41.01	1.8561	99.8858
East_African_Short_Zebu	EASZ	EASZ	EASZ183	AZE	African Indicine Composite	Bos indicus	Kenya	Recent	Olivier Hanotte / Abdulfatai Tijjani	Modern	1.85	35679436	35525870	35492264	5108964699	5105957033	10132654	9205.09	266	15.0621	176718	47.82	0.91	40.56	1.8516	99.5696
Zebu_Gobra	ZEBG	ZEBG	ZEBG38	AFS	African Sanga	Bos indicus	Senegal	1992	Previously part of microsatellite study	Modern	1.85	40351982	40302941	40270464	5106764459	5103856415	3806239	11758.4	175	14.601	22859	45.08	0.81	41.28	1.8508	99.8785
Borgou	BORG	BORG	BORG10	AFS	African Sanga	Bos taurus/Bos indicus hybrid	Benin	1992	Previously part of microsatellite study	Modern	1.84	38451760	38383904	38335278	5084618732	5082003563	5653633	10773.9	213	14.9198	127066	44.93	0.81	42.14	1.8428	99.8235
East_African_Short_Zebu	EASZ	EASZ	EASZ221	AZE	African Indicine Composite	Bos indicus	Kenya	Recent	Olivier Hanotte / Abdulfatai Tijjani	Modern	1.83	35410506	35279902	35254802	5050733378	5047622674	10278893	8771.74	233	15.2994	174540	47.5	0.93	41.27	1.8305	99.6312
Zebu_Gobra	ZEBG	ZEBG	ZEBG13	AFS	African Sanga	Bos indicus	Senegal	1992	Previously part of microsatellite study	Modern	1.83	40617378	40572286	40543780	5053639525	5050733221	4044949	12994.1	168	14.6545	23173	45.06	0.81	41.93	1.8316	99.889
Tuli	TULI	TULI	TULI30	SAC	South African Composite	Bos taurus/Bos indicus hybrid	South Africa	2022	University of Pretoria	Modern	1.83	37777346	37730441	37711424	5062390472	5060082412	5276882	13850.3	212	15.0687	67944	45.07	0.73	43.43	1.8348	99.8758
Nguni	NGNT	NGUN	NGUN11	AFS	African Sanga	Bos taurus/Bos indicus hybrid	South Africa	2000	Previously part of microsatellite study	Modern	1.82	47385550	47330440	47308588	5030222671	5028232726	4561409	28039.6	114	14.0381	473849	46.31	0.56	41.19	1.8231	99.8837
Muturu_Nigeria_1990s	MUTT	MUTT	MUTT17	AFT	African taurine	Bos taurus	Nigeria	1992	Previously part of microsatellite study	Modern	1.81	38825514	38772352	38733488	4993756864	4991723152	3843103	12878	181	14.6624	48621	45.33	0.99	41.91	1.8099	99.8631
Zebu_Peul	ZEBP	ZEBP	ZEBP09	AFS	African Sanga	Bos indicus	Burkina Faso	1992	Previously part of microsatellite study	Modern	1.81	39684384	39621718	39576790	4994772063	4991864506	3171442	15781.2	167	14.4347	22113	46.2	0.91	41.72	1.8103	99.8421
Watusi	WATU	WATU	WATU04	AFS	African Sanga	Bos taurus/Bos indicus hybrid	Rwanda	2000	Previously part of microsatellite study	Modern	1.8	54799424	54749081	54726372	4967957736	4965995035	7536884	72093.6	94	13.155	472970	49.62	0.63	38.45	1.8005	99.9081
Borgou	BORG	BORG	BORG47	AFS	African Sanga	Bos taurus/Bos indicus hybrid	Benin	1992	Previously part of microsatellite study	Modern	1.79	36801414	36733590	36686656	4952361188	4949851174	4690627	10120.5	218	14.948	126556	44.85	0.81	41.76	1.7949	99.8157
Namchi	NAMC	NAMC	NAMC07	AFT	African taurine	Bos taurus	Cameroon	1992	Previously part of microsatellite study	Modern	1.79	39497890	39416037	39369778	4938000160	4935631866	4700228	13477.9	173	14.5399	31482	45.5	0.79	39.93	1.7897	99.7928
NDama_Senegal_1990s	NDST	NDST	NDST25	AFT	African taurine	Bos taurus	Senegal	1992	Previously part of microsatellite study	Modern	1.79	43440960	43394332	43378840	4925467371	4923551082	8757855	21745.1	135	14.3242	236817	45.75	0.51	43.33	1.7851	99.8927
Tuli	TULI	TULI	TULI20	SAC	South African Composite	Bos taurus/Bos indicus hybrid	South Africa	2022	University of Pretoria	Modern	1.79	39870832	39829071	39811960	4947848704	4945702643	4676033	12881.6	153	14.6206	64072	45.24	0.66	43.18	1.7932	99.8953
East_African_Short_Zebu	EASZ	EASZ	EASZ189	AZE	African Indicine Composite	Bos indicus	Kenya	Recent	Olivier Hanotte / Abdulfatai Tijjani	Modern	1.77	34011452	33872667	33843110	4875636006	4872520106	10030602	8939.19	263	14.8766	171351	46.42	0.91	42.18	1.7671	99.5919
East_African_Short_Zebu	EASZ	EASZ	EASZ205	AZE	African Indicine Composite	Bos indicus	Kenya	Recent	Olivier Hanotte / Abdulfatai Tijjani	Modern	1.77	34423246	34305693	34276618	4896841441	4893560371	10284992	8109.1	230	14.8649	172139	47.12	0.99	40.8	1.7748	99.6585
Kuri	KRIT	KURI	KURI12	AFT	African taurine	Bos taurus	Chad	1992	Previously part of microsatellite study	Modern	1.77	38580216	38536717	38512770	4886635401	4884000715	4835741	10352.2	167	14.5823	126226	45.05	0.73	41.29	1.7711	99.8873
Mbororo	MBOR	MBOR	MBOR16	AFS	African Sanga	Bos taurus/Bos indicus hybrid	Nigeria	1992	Previously part of microsatellite study	Modern	1.77	42829410	42781713	42751576	4887808290	4884905140	4105150	18854.4	132	14.0413	20434	46.01	0.86	39.79	1.7715	99.8886
Sokoto_Gudali	SOKO	SOKO	SOKO06	AFS	African Sanga	Bos indicus	Nigeria	1992	Previously part of microsatellite study	Modern	1.77	38468974	38414467	38387336	4897465258	4894479283	4148429	14202.6	184	14.7157	54907	44.88	0.85	41.92	1.775	99.8583
Tuli	TULI	TULI	TULI21	SAC	South African Composite	Bos taurus/Bos indicus hybrid	South Africa	2022	University of Pretoria	Modern	1.77	45074892	45020576	44993712	4894474730	4892468366	5702735	24511.9	121	14.0705	64157	46.5	0.62	42.11	1.7739	99.8795
East_African_Short_Zebu	EASZ	EASZ	EASZ007	AZE	African Indicine Composite	Bos indicus	Kenya	Recent	Olivier Hanotte / Abdulfatai Tijjani	Modern	1.76	34242792	34065076	34035890	4856643043	4853388869	9763979	6322.98	242	15.0135	171386	50.6	1.14	38.17	1.7602	99.481
East_African_Short_Zebu	EASZ	EASZ	EASZ176	AZE	African Indicine Composite	Bos indicus	Kenya	Recent	Olivier Hanotte / Abdulfatai Tijjani	Modern	1.76	33683430	33536237	33504144	4862577235	4859249837	8670304	12839.1	261	14.9705	163210	46.2	0.94	41.28	1.7623	99.563
East_African_Short_Zebu	EASZ	EASZ	EASZ126	AZE	African Indicine Composite	Bos indicus	Kenya	Recent	Olivier Hanotte / Abdulfatai Tijjani	Modern	1.76	34689922	34183052	34159286	4845574634	4843687187	9849096	5192.58	220	15.7474	167764	48.54	0.63	42.44	1.7562	98.5389
NDama_Guinea_1990s	NDAG	NDAG	NDAG32	AFT	African taurine	Bos taurus	Guinea	1992	Previously part of microsatellite study	Modern	1.76	38780848	38719002	38683426	4857903399	4856052066	4573100	16631.8	176	14.5201	54972	46.54	0.68	42.16	1.7606	99.8405
NDama_Guinea_1990s	NDAG	NDAG	NDAG24	AFT	African taurine	Bos taurus	Guinea	1992	Previously part of microsatellite study	Modern	1.76	39257978	39201280	39167238	4861461733	4859629103	4714513	12859.9	171	14.5975	56432	46	0.65	42.56	1.7619	99.8556
Raya_Zebu	RYAT	RAYA	RAYA06	AFI	African Indicine	Bos taurus/Bos indicus hybrid	Ethiopia	2000	Previously part of microsatellite study	Modern	1.76	51597642	51538497	51513852	4849312277	4846915708	6540699	71949.1	97	13.4979	460360	47.98	0.68	40.61	1.7575	99.8854
Zebu_Gobra	ZEBG	ZEBG	ZEBG41	AFS	African Sanga	Bos indicus	Senegal	1992	Previously part of microsatellite study	Modern	1.76	38931634	38892275	38868136	4855130195	4852078914	3917322	12096.9	166	14.3852	21657	45.28	0.82	40.28	1.7596	99.8989
NDama_Guinea_1990s	NDAG	NDAG	NDAG45	AFT	African taurine	Bos taurus	Guinea	1992	Previously part of microsatellite study	Modern	1.75	38461704	38411426	38379946	4842189131	4840316418	4335764	10947.6	163	14.5822	54299	45.55	0.65	42.63	1.755	99.8693
Somba	SOMB	SOMB	SOMB50	AFT	African taurine	Bos taurus	Togo	1992	Previously part of microsatellite study	Modern	1.75	45543568	45510201	45495138	4840647579	4838197694	8186203	25962.1	116	13.8748	236252	47.42	0.62	40.96	1.7544	99.9267
Tuli	TULI	TULI	TULI46	SAC	South African Composite	Bos taurus/Bos indicus hybrid	South Africa	2022	University of Pretoria	Modern	1.75	35298708	35261590	35245888	4833755837	4831520258	5384908	12720	206	14.9797	65565	44.29	0.67	44.18	1.7519	99.8948
East_African_Short_Zebu	EASZ	EASZ	EASZ225	AZE	African Indicine Composite	Bos indicus	Kenya	Recent	Olivier Hanotte / Abdulfatai Tijjani	Modern	1.74	33209408	33101301	33073222	4800471894	4797907914	9150024	7677.41	267	15.1637	167569	47.26	0.82	42.2	1.7398	99.6745
Mbororo	MBOR	MBOR	MBOR39	AFS	African Sanga	Bos taurus/Bos indicus hybrid	Nigeria	1992	Previously part of microsatellite study	Modern	1.74	40293610	40255446	40229564	4812804111	4810012498	4599456	20533	154	13.9409	20748	49.2	0.97	38.88	1.7443	99.9053
Namchi	NAMC	NAMC	NAMC20	AFT	African taurine	Bos taurus	Cameroon	1992	Previously part of microsatellite study	Modern	1.74	39126794	39080831	39054936	4810488210	4808028648	4186533	14063.1	157	14.3497	23169	45.7	1.05	39.03	1.7435	99.8825
East_African_Short_Zebu	EASZ	EASZ	EASZ165	AZE	African Indicine Composite	Bos indicus	Kenya	Recent	Olivier Hanotte / Abdulfatai Tijjani	Modern	1.73	33657762	33507940	33485468	4773971322	4771663828	9486102	5735.49	230	15.3033	168967	46.98	0.73	42.23	1.7302	99.5549
Muturu_Nigeria_1990s	MUTT	MUTT	MUTT07	AFT	African taurine	Bos taurus	Nigeria	1992	Previously part of microsatellite study	Modern	1.73	39260518	39219482	39196540	4778272773	4776399179	5366561	12416.3	156	14.5486	52899	45.63	0.59	41.74	1.7318	99.8955
NDama_Guinea_1990s	NDAG	NDAG	NDAG52	AFT	African taurine	Bos taurus	Guinea	1992	Previously part of microsatellite study	Modern	1.73	38335378	38281582	38249788	4775211078	4773360566	4633848	11369.3	166	14.6923	54178	45.78	0.65	42.64	1.7307	99.8597
Sokoto_Gudali	SOKO	SOKO	SOKO09	AFS	African Sanga	Bos indicus	Nigeria	1992	Previously part of microsatellite study	Modern	1.73	33580656	32972107	32428690	4764535016	4761824539	2414780	17093.7	344	14.812	39557	43.13	3.51	40.81	1.7268	98.1878
Iringa_Red	IRIN	IRIN	IRIN04	AFI	African Indicine	Bos indicus	Tanzania	2000	Previously part of microsatellite study	Modern	1.72	43193860	43150435	43126936	4745274555	4742509301	4293948	23692.5	124	14.1545	457208	46.79	0.75	41.24	1.7198	99.8995
Watusi	WATU	WATU	WATU03	AFS	African Sanga	Bos taurus/Bos indicus hybrid	Rwanda	2000	Previously part of microsatellite study	Modern	1.72	42755640	42715071	42691826	4737545522	4735368714	4253673	70188.4	128	14.1181	438487	47.63	0.66	40.34	1.717	99.9051
Zebu_Gobra	ZEBG	ZEBG	ZEBG10	AFS	African Sanga	Bos indicus	Senegal	1992	Previously part of microsatellite study	Modern	1.72	37574902	37536038	37515294	4753400386	4750655131	3389114	11451.2	173	14.6447	21412	45.24	0.8	41.09	1.7228	99.8966
Zebu_Gobra	ZEBG	ZEBG	ZEBG12	AFS	African Sanga	Bos indicus	Senegal	1992	Previously part of microsatellite study	Modern	1.72	37320530	37284486	37261448	4749213643	4746432513	3685371	11188.4	179	14.4884	21052	45.31	0.83	40.94	1.7213	99.9034
East_African_Short_Zebu	EASZ	EASZ	EASZ219	AZE	African Indicine Composite	Bos indicus	Kenya	Recent	Olivier Hanotte / Abdulfatai Tijjani	Modern	1.71	33061502	32920785	32893814	4715132931	4712158768	10006094	9619.25	243	15.075	165403	46.28	0.88	42.44	1.7089	99.5744
Fogera	FOGE	FOGE	FOGE09	AFI	African Indicine	Bos taurus/Bos indicus hybrid	Ethiopia	1992	Previously part of microsatellite study	Modern	1.71	41707530	41659243	41635976	4715511882	4712808246	4274108	28413	132	14.0541	437758	46.59	0.77	41.49	1.709	99.8842
NDama_Gambia_1990s	NDGT	NDGM	NDGM17	AFT	African taurine	Bos taurus	Gambia	1992	Previously part of microsatellite study	Modern	1.71	37807336	37759979	37740120	4706835065	4704839691	3422214	14714.7	162	14.7462	16584	45.92	0.77	42.22	1.7059	99.8747
Zebu_Gobra	ZEBG	ZEBG	ZEBG35	AFS	African Sanga	Bos indicus	Senegal	1992	Previously part of microsatellite study	Modern	1.71	33254866	33178229	33121846	4712372827	4709525491	2699940	8669.98	249	14.9891	11877	44.2	1.46	41.52	1.7079	99.7695
East_African_Short_Zebu	EASZ	EASZ	EASZ175	AZE	African Indicine Composite	Bos indicus	Kenya	Recent	Olivier Hanotte / Abdulfatai Tijjani	Modern	1.7	32837300	32690352	32660022	4698448214	4695819933	9692365	10388.3	249	15.2049	164572	46.59	0.81	42.18	1.7029	99.5525
East_African_Short_Zebu	EASZ	EASZ	EASZ056	AZE	African Indicine Composite	Bos indicus	Kenya	Recent	Olivier Hanotte / Abdulfatai Tijjani	Modern	1.7	32610874	32503603	32472302	4693596650	4691616082	8228207	9187.81	250	15.4922	148984	46.24	0.64	42.91	1.7011	99.6711
East_African_Short_Zebu	EASZ	EASZ	EASZ093	AZE	African Indicine Composite	Bos indicus	Kenya	Recent	Olivier Hanotte / Abdulfatai Tijjani	Modern	1.7	32763628	32627288	32593880	4692511954	4689932813	8042919	8328.47	246	15.1067	159092	45.86	0.75	43.13	1.7007	99.5839
NDama_Guinea_1990s	NDAG	NDAG	NDAG35	AFT	African taurine	Bos taurus	Guinea	1992	Previously part of microsatellite study	Modern	1.7	38311076	38247459	38215370	4702981120	4701186927	4337787	14980.9	163	14.6243	52849	45.91	0.64	42.27	1.7045	99.8339
Zebu_Gobra	ZEBG	ZEBG	ZEBG15	AFS	African Sanga	Bos indicus	Senegal	1992	Previously part of microsatellite study	Modern	1.7	36362686	36326454	36304652	4704102581	4701373017	3398676	9809.82	188	14.583	19966	45.06	0.89	40.83	1.7049	99.9004
East_African_Short_Zebu	EASZ	EASZ	EASZ157	AZE	African Indicine Composite	Bos indicus	Kenya	Recent	Olivier Hanotte / Abdulfatai Tijjani	Modern	1.69	32652982	32523642	32497622	4659727547	4656736032	9874012	7202.09	243	15.0169	165859	47.97	1	40.64	1.6888	99.6039
Zebu_Gobra	ZEBG	ZEBG	ZEBG34	AFS	African Sanga	Bos indicus	Senegal	1992	Previously part of microsatellite study	Modern	1.69	38302422	38268042	38245800	4649879641	4647134890	3473311	14091.2	151	14.2762	19991	45.25	0.78	41.39	1.6853	99.9102
East_African_Short_Zebu	EASZ	EASZ	EASZ237	AZE	African Indicine Composite	Bos indicus	Kenya	Recent	Olivier Hanotte / Abdulfatai Tijjani	Modern	1.68	32100398	31981239	31950342	4646343013	4643361672	9954854	8917.37	274	14.8915	166178	45.65	0.91	42.7	1.684	99.6288
East_African_Short_Zebu	EASZ	EASZ	EASZ002	AZE	African Indicine Composite	Bos indicus	Kenya	Recent	Olivier Hanotte / Abdulfatai Tijjani	Modern	1.67	33143040	33012792	32986664	4597893240	4594942354	9094865	7528.42	196	15.0711	163039	48.05	0.94	40.69	1.6664	99.607
NDama_Gambia_1990s	NDGT	NDGM	NDGM16	AFT	African taurine	Bos taurus	Gambia	1992	Previously part of microsatellite study	Modern	1.67	37298846	37253171	37227220	4594383146	4592475994	4073121	12576.4	162	14.4922	20828	45.98	0.65	41.84	1.6651	99.8775
Sokoto_Gudali	SOKO	SOKO	SOKO19	AFS	African Sanga	Bos indicus	Nigeria	1992	Previously part of microsatellite study	Modern	1.67	35427962	35386518	35360782	4617800729	4614948081	3453927	11320.7	200	14.6739	46686	45.06	1.09	40.85	1.6736	99.883
East_African_Short_Zebu	EASZ	EASZ	EASZ037	AZE	African Indicine Composite	Bos indicus	Kenya	Recent	Olivier Hanotte / Abdulfatai Tijjani	Modern	1.66	32082588	31899033	31864742	4581378187	4578546648	7882892	9656.59	246	15.1172	155481	46.68	0.89	41.3	1.6604	99.4279
Kavirondo	KAVI	KAVI	KAVI06	AFI	African Indicine	Bos indicus	Kenya	2000	Previously part of microsatellite study	Modern	1.66	41939048	41897201	41877906	4591350560	4588864644	4208059	25839.2	123	13.9468	433603	46.33	0.73	42.05	1.664	99.9002
Mbororo	MBOR	MBOR	MBOR07	AFS	African Sanga	Bos taurus/Bos indicus hybrid	Nigeria	1992	Previously part of microsatellite study	Modern	1.66	42716546	42667647	42635536	4583031932	4580308095	5021867	21363.2	117	13.7519	19014	46.7	0.86	37.63	1.661	99.8855
NDama_Guinea_1990s	NDAG	NDAG	NDAG17	AFT	African taurine	Bos taurus	Guinea	1992	Previously part of microsatellite study	Modern	1.66	38097544	38042480	38010476	4566819939	4565137357	4738094	14385.8	151	14.4531	51118	46.06	0.62	42.71	1.6552	99.8555
Zebu_Gobra	ZEBG	ZEBG	ZEBG42	AFS	African Sanga	Bos indicus	Senegal	1992	Previously part of microsatellite study	Modern	1.66	36878766	36840016	36815730	4588387213	4585681443	3399946	12548	160	14.4625	20281	45.13	0.78	41.2	1.663	99.8949
East_African_Short_Zebu	EASZ	EASZ	EASZ089	AZE	African Indicine Composite	Bos indicus	Kenya	Recent	Olivier Hanotte / Abdulfatai Tijjani	Modern	1.65	31689608	31556254	31528040	4546365171	4543371896	8228073	12349.2	243	15.0115	155771	46.51	0.94	41.68	1.6477	99.5792
NDama_Gambia_1990s	NDGT	NDGM	NDGM13	AFT	African taurine	Bos taurus	Gambia	1992	Previously part of microsatellite study	Modern	1.65	35526426	35489585	35471372	4549965002	4548071073	2331038	11314.6	180	14.7654	14094	45.58	0.8	42.45	1.649	99.8963
East_African_Short_Zebu	EASZ	EASZ	EASZ163	AZE	African Indicine Composite	Bos indicus	Kenya	Recent	Olivier Hanotte / Abdulfatai Tijjani	Modern	1.64	31659770	31554296	31529462	4537785112	4534930460	9285484	7307.88	241	15.2005	160853	47.58	0.93	41.24	1.6446	99.6669
Kuri	KRIT	KURI	KURI38	AFT	African taurine	Bos taurus	Chad	1992	Previously part of microsatellite study	Modern	1.64	32352998	32275508	32217166	4537609934	4535185882	3925162	12366.8	241	14.9226	103088	45.51	1.47	40.7	1.6446	99.7605
Mbororo	MBOR	MBOR	MBOR13	AFS	African Sanga	Bos taurus/Bos indicus hybrid	Nigeria	1992	Previously part of microsatellite study	Modern	1.64	39083206	39002880	38945528	4515702766	4512944371	3724917	16653.2	136	14.1489	19515	46.27	0.96	38.79	1.6366	99.7945
NDama_Gambia_1990s	NDGT	NDGM	NDGM14	AFT	African taurine	Bos taurus	Gambia	1992	Previously part of microsatellite study	Modern	1.64	36644032	36601828	36580112	4514690610	4512837736	3074726	14120.7	162	14.5681	20055	45.69	0.65	41.96	1.6363	99.8848
Zebu_Gobra	ZEBG	ZEBG	ZEBG28	AFS	African Sanga	Bos indicus	Senegal	1992	Previously part of microsatellite study	Modern	1.64	37035328	36993516	36967356	4534938534	4532252322	3846857	15368.5	159	14.3905	19914	45.61	0.82	39.97	1.6436	99.8871
Tuli	TULI	TULI	TULI27	SAC	South African Composite	Bos taurus/Bos indicus hybrid	South Africa	2022	University of Pretoria	Modern	1.64	38656756	38620793	38604046	4521519026	4519574305	5088942	20645.8	138	14.4263	59345	46.01	0.65	42.6	1.6387	99.907
East_African_Short_Zebu	EASZ	EASZ	EASZ243	AZE	African Indicine Composite	Bos indicus	Kenya	Recent	Olivier Hanotte / Abdulfatai Tijjani	Modern	1.63	31280550	31192271	31171126	4503367260	4501435237	8765026	7511.62	245	15.4143	158551	50.61	0.71	40.12	1.6322	99.7178
Muturu_Nigeria_1990s	MUTT	MUTT	MUTT14	AFT	African taurine	Bos taurus	Nigeria	1992	Previously part of microsatellite study	Modern	1.63	36779370	36738262	36715740	4506294229	4503896913	4566226	14559.1	158	14.4901	49877	45.96	0.8	40.59	1.6332	99.8882
East_African_Short_Zebu	EASZ	EASZ	EASZ042	AZE	African Indicine Composite	Bos indicus	Kenya	Recent	Olivier Hanotte / Abdulfatai Tijjani	Modern	1.62	31298304	31167791	31142952	4457811102	4456088039	9268526	6267.86	239	15.6503	158043	46.89	0.59	43.08	1.6156	99.583
East_African_Short_Zebu	EASZ	EASZ	EASZ234	AZE	African Indicine Composite	Bos indicus	Kenya	Recent	Olivier Hanotte / Abdulfatai Tijjani	Modern	1.61	30560524	30460185	30428000	4430680111	4428816253	8929430	9506.29	278	15.5322	157729	47.41	0.71	42.16	1.6058	99.6717
Danakil	DANA	DANA	DANA09	AFI	African Indicine	Bos taurus/Bos indicus hybrid	Ethiopia	2000	Previously part of microsatellite study	Modern	1.61	39990722	39943406	39921756	4455032834	4452514819	4071235	39658.5	127	14.0484	414502	47.08	0.79	41.33	1.6146	99.8817
Danakil	DANA	DANA	DANA15	AFI	African Indicine	Bos taurus/Bos indicus hybrid	Ethiopia	2000	Previously part of microsatellite study	Modern	1.61	40701488	40655889	40636450	4448913725	4446385089	4453914	24216.2	122	14.1081	409572	46.58	0.77	41.71	1.6124	99.888
Zebu_Maure	ZBMT	ZBMA	ZBMA21	AFS	African Sanga	Bos indicus	Mauritania	1992	Previously part of microsatellite study	Modern	1.61	40650600	40589574	40552852	4447116413	4444892086	3962402	20577.4	120	14.0374	18784	45.71	0.74	42.67	1.6118	99.8499
Tuli	TULI	TULI	TULI41	SAC	South African Composite	Bos taurus/Bos indicus hybrid	South Africa	2022	University of Pretoria	Modern	1.61	37174520	37117222	37100526	4429214474	4427260073	5093509	19711.7	152	14.4824	61033	45.45	0.64	42.96	1.6053	99.8459
NDama_Senegal_1990s	NDST	NDST	NDST49	AFT	African taurine	Bos taurus	Senegal	1992	Previously part of microsatellite study	Modern	1.6	36373868	36344632	36330490	4406066193	4404316184	7157544	12298.4	147	14.4879	206863	45.75	0.54	42.67	1.5969	99.9196
Zebu_Gobra	ZEBG	ZEBG	ZEBG23	AFS	African Sanga	Bos indicus	Senegal	1992	Previously part of microsatellite study	Modern	1.6	34745986	34711715	34692358	4418156157	4415453214	3079690	13654.7	182	14.5516	16577	45.31	1.02	40.1	1.6013	99.9014
East_African_Short_Zebu	EASZ	EASZ	EASZ003	AZE	African Indicine Composite	Bos indicus	Kenya	Recent	Olivier Hanotte / Abdulfatai Tijjani	Modern	1.59	31299592	31146933	31125428	4396805985	4394719362	8824717	7320.88	213	15.4365	155705	46.98	0.67	42.28	1.5935	99.5123
East_African_Short_Zebu	EASZ	EASZ	EASZ181	AZE	African Indicine Composite	Bos indicus	Kenya	Recent	Olivier Hanotte / Abdulfatai Tijjani	Modern	1.58	30383956	30253417	30225834	4353719224	4350983226	7680026	7408.8	247	15.1554	149462	47.39	0.91	39.94	1.5779	99.5704
East_African_Short_Zebu	EASZ	EASZ	EASZ113	AZE	African Indicine Composite	Bos indicus	Kenya	Recent	Olivier Hanotte / Abdulfatai Tijjani	Modern	1.58	30389910	30236971	30209718	4360646423	4357896889	9529626	10823.1	250	15.0782	152596	46.6	0.85	42.06	1.5804	99.4967
Fogera	FOGE	FOGE	FOGE19	AFI	African Indicine	Bos taurus/Bos indicus hybrid	Ethiopia	1992	Previously part of microsatellite study	Modern	1.58	39732768	39689314	39671390	4353043445	4350579458	4367212	22114.5	123	14.2561	410460	46.82	0.75	41.27	1.5777	99.8906
East_African_Short_Zebu	EASZ	EASZ	EASZ194	AZE	African Indicine Composite	Bos indicus	Kenya	Recent	Olivier Hanotte / Abdulfatai Tijjani	Modern	1.57	30196428	30094085	30068986	4320297152	4317366713	8660295	6887.94	235	14.985	149210	49.8	1.01	38.75	1.5658	99.6611
East_African_Short_Zebu	EASZ	EASZ	EASZ230	AZE	African Indicine Composite	Bos indicus	Kenya	Recent	Olivier Hanotte / Abdulfatai Tijjani	Modern	1.57	30314832	30173855	30151008	4328092145	4325169554	9210048	8042.86	236	15.0545	152450	47.33	1	40.6	1.5686	99.535
Fogera	FOGE	FOGE	FOGE15	AFI	African Indicine	Bos taurus/Bos indicus hybrid	Ethiopia	1992	Previously part of microsatellite study	Modern	1.57	38115982	38077110	38057244	4340875050	4338397261	3855864	22839.7	134	14.2356	402480	46.45	0.79	41.44	1.5733	99.898
Mbororo	MBOR	MBOR	MBOR41	AFS	African Sanga	Bos taurus/Bos indicus hybrid	Nigeria	1992	Previously part of microsatellite study	Modern	1.57	36839832	36804149	36780528	4343958649	4341475403	4406138	21194.8	145	13.8837	18945	49.64	1.02	37.96	1.5744	99.9031
East_African_Short_Zebu	EASZ	EASZ	EASZ216	AZE	African Indicine Composite	Bos indicus	Kenya	Recent	Olivier Hanotte / Abdulfatai Tijjani	Modern	1.56	30243564	30127188	30102092	4309515539	4306754299	8624343	9094.82	236	15.0224	153346	46.77	0.91	41.61	1.5619	99.6152
Tonga	TONG	TONG	TONG04	AFS	African Sanga	Bos taurus/Bos indicus hybrid	South Africa	2000	Previously part of microsatellite study	Modern	1.55	38557388	38510938	38489712	4286840096	4284817433	3603804	42941.5	125	14.1703	399274	46.58	0.67	41.09	1.5537	99.8795
Zebu_Gobra	ZEBG	ZEBG	ZEBG27	AFS	African Sanga	Bos indicus	Senegal	1992	Previously part of microsatellite study	Modern	1.55	34054158	34016944	33993856	4268731236	4266216148	3624637	13544.8	169	14.3567	19055	45.24	0.81	40.23	1.5471	99.8907
East_African_Short_Zebu	EASZ	EASZ	EASZ080	AZE	African Indicine Composite	Bos indicus	Kenya	Recent	Olivier Hanotte / Abdulfatai Tijjani	Modern	1.54	29454846	29324801	29293900	4237033414	4234375915	7179151	9830.82	265	14.9412	139710	45.73	0.9	42.71	1.5356	99.5585
Danakil	DANA	DANA	DANA08	AFI	African Indicine	Bos taurus/Bos indicus hybrid	Ethiopia	2000	Previously part of microsatellite study	Modern	1.54	38619998	38585040	38567914	4243240639	4240831695	3963225	26288.7	124	14.1796	393860	46.61	0.83	41.29	1.5379	99.9095
Kapsiki	KAPS	KAPS	KAPS50	AFT	African taurine	Bos taurus	Nigeria	1992	Previously part of microsatellite study	Modern	1.54	36677490	36637113	36612002	4248651256	4246289205	5335988	17428.2	140	14.1386	105920	46.25	0.83	38.92	1.5398	99.8899
Mbororo	MBOR	MBOR	MBOR34	AFS	African Sanga	Bos taurus/Bos indicus hybrid	Nigeria	1992	Previously part of microsatellite study	Modern	1.54	34824864	34790409	34768210	4245779188	4243296615	3650127	23619.6	160	14.0974	16563	49.45	1.09	38.03	1.5388	99.9011
Raya_Zebu	RYAT	RAYA	RAYA04	AFI	African Indicine	Bos taurus/Bos indicus hybrid	Ethiopia	2000	Previously part of microsatellite study	Modern	1.54	39978632	39937130	39916460	4244578311	4242253009	4229541	43399.8	116	13.8386	399949	46.67	0.73	42.29	1.5384	99.8962
Somba	SOMB	SOMB	SOMB23	AFT	African taurine	Bos taurus	Togo	1992	Previously part of microsatellite study	Modern	1.54	38904266	38877863	38866092	4257460180	4255952453	6295033	20899.1	119	14.0231	201392	46	0.45	42.8	1.543	99.9321
Zebu_Peul	ZEBP	ZEBP	ZEBP19	AFS	African Sanga	Bos indicus	Burkina Faso	1992	Previously part of microsatellite study	Modern	1.54	35074798	35038845	35016548	4255220032	4252894096	2916671	20126.3	151	13.8676	17410	47.11	0.85	41.62	1.5422	99.8975
East_African_Short_Zebu	EASZ	EASZ	EASZ110	AZE	African Indicine Composite	Bos indicus	Kenya	Recent	Olivier Hanotte / Abdulfatai Tijjani	Modern	1.53	29609964	29508735	29484674	4233460486	4231519878	8510400	6189.48	229	15.4587	147941	46.75	0.65	43.08	1.5343	99.6581
Borgou	BORG	BORG	BORG41	AFS	African Sanga	Bos taurus/Bos indicus hybrid	Benin	1992	Previously part of microsatellite study	Modern	1.53	31593582	31544668	31518602	4227686304	4225422383	3420731	10936.8	211	14.8642	105583	44.3	0.8	41.71	1.5322	99.8452
Borgou	BORG	BORG	BORG44	AFS	African Sanga	Bos taurus/Bos indicus hybrid	Benin	1992	Previously part of microsatellite study	Modern	1.53	32105724	32056043	32032006	4222577532	4220212309	3994789	11429.7	191	14.8767	110616	44.85	0.78	41.54	1.5304	99.8453
Danakil	DANA	DANA	DANA05	AFI	African Indicine	Bos taurus/Bos indicus hybrid	Ethiopia	2000	Previously part of microsatellite study	Modern	1.53	36878000	36834293	36815240	4207997121	4205498193	3487403	20038.6	131	14.1907	385720	46.48	0.81	41.05	1.5251	99.8815
Somba	SOMB	SOMB	SOMB24	AFT	African taurine	Bos taurus	Togo	1992	Previously part of microsatellite study	Modern	1.53	38152014	38122976	38109632	4218109583	4216142800	6813124	27970.6	126	14.0335	201304	46.26	0.58	41.46	1.5288	99.9239
Watusi	WATU	WATU	WATU06	AFS	African Sanga	Bos taurus/Bos indicus hybrid	Rwanda	2000	Previously part of microsatellite study	Modern	1.53	38198820	38155231	38133384	4216070391	4214023190	3748500	24929.6	125	14.188	398580	45.84	0.64	42.49	1.528	99.8859
Zebu_Gobra	ZEBG	ZEBG	ZEBG18	AFS	African Sanga	Bos indicus	Senegal	1992	Previously part of microsatellite study	Modern	1.53	33163282	33128010	33108114	4228305882	4225871879	2858388	13149.9	181	14.5819	18711	45.13	0.79	41.35	1.5325	99.8936
Zebu_Peul	ZEBP	ZEBP	ZEBP08	AFS	African Sanga	Bos indicus	Burkina Faso	1992	Previously part of microsatellite study	Modern	1.53	34693782	34657379	34634068	4230901469	4228559778	2945208	18147.4	152	14.2201	17899	47.02	0.86	41.74	1.5334	99.8951
Tuli	TULI	TULI	TULI34	SAC	South African Composite	Bos taurus/Bos indicus hybrid	South Africa	2022	University of Pretoria	Modern	1.53	32605606	32527840	32512208	4226895063	4225150442	4020143	34406.2	171	14.3811	55120	44.97	0.75	42.49	1.532	99.7615
East_African_Short_Zebu	EASZ	EASZ	EASZ062	AZE	African Indicine Composite	Bos indicus	Kenya	Recent	Olivier Hanotte / Abdulfatai Tijjani	Modern	1.52	28897732	28786201	28746780	4191193974	4188710995	7661897	9409.92	280	14.9753	143493	45.75	0.87	42.71	1.519	99.614
East_African_Short_Zebu	EASZ	EASZ	EASZ236	AZE	African Indicine Composite	Bos indicus	Kenya	Recent	Olivier Hanotte / Abdulfatai Tijjani	Modern	1.52	29976248	29535176	29516702	4200139964	4198422645	7927539	9047.86	217	16.0716	149501	49.61	0.68	39.97	1.5223	98.5286
Muturu_Nigeria_1990s	MUTT	MUTT	MUTT26	AFT	African taurine	Bos taurus	Nigeria	1992	Previously part of microsatellite study	Modern	1.52	32269626	32222251	32190548	4188490451	4186823855	2632141	9705.3	195	14.8023	46500	45.34	0.7	42.8	1.518	99.8532
Namchi	NAMC	NAMC	NAMC05	AFT	African taurine	Bos taurus	Cameroon	1992	Previously part of microsatellite study	Modern	1.52	35323648	35261928	35226010	4207078961	4204997383	4600457	15579.7	149	14.4269	26884	46.01	0.77	39.62	1.5248	99.8253
Somba	SOMB	SOMB	SOMB29	AFT	African taurine	Bos taurus	Togo	1992	Previously part of microsatellite study	Modern	1.52	43179052	43149012	43134770	4189305396	4187687594	7818201	24664.3	98	13.5141	199446	47.39	0.51	40	1.5183	99.9304
Zebu_Gobra	ZEBG	ZEBG	ZEBG17	AFS	African Sanga	Bos indicus	Senegal	1992	Previously part of microsatellite study	Modern	1.52	32377848	32326542	32290994	4188097513	4185771189	2911025	10626.7	193	14.7422	18810	45.29	0.86	41.5	1.5179	99.8415
Nguni	NGUN	NGUN	NGUN43	AFS	African Sanga	Bos taurus/Bos indicus hybrid	South Africa	2022	University of Pretoria	Modern	1.52	32602990	32575825	32564304	4197920565	4195925315	3627169	12807.7	182	14.8247	50069	44.61	0.83	43.4	1.5215	99.9167
East_African_Short_Zebu	EASZ	EASZ	EASZ148	AZE	African Indicine Composite	Bos indicus	Kenya	Recent	Olivier Hanotte / Abdulfatai Tijjani	Modern	1.51	28879244	28793315	28772718	4169429042	4167430308	8601821	6689.29	250	15.4441	148949	45.83	0.69	43.37	1.5111	99.7025
East_African_Short_Zebu	EASZ	EASZ	EASZ102	AZE	African Indicine Composite	Bos indicus	Kenya	Recent	Olivier Hanotte / Abdulfatai Tijjani	Modern	1.51	29465900	29360565	29341854	4175835015	4174230797	8685568	4795.31	217	15.4167	146585	47.85	0.6	42.42	1.5134	99.6425
Danakil	DANA	DANA	DANA13	AFI	African Indicine	Bos taurus/Bos indicus hybrid	Ethiopia	2000	Previously part of microsatellite study	Modern	1.51	37947636	37906414	37885560	4158486188	4156111373	4083704	40716	126	14.0416	390290	47.44	0.81	40.66	1.5072	99.8914
Namchi	NAMC	NAMC	NAMC52	AFT	African taurine	Bos taurus	Cameroon	1992	Previously part of microsatellite study	Modern	1.51	35057756	35024804	35003676	4166186760	4164167542	4706873	14293.4	147	14.3382	26593	45.51	0.72	39.34	1.51	99.906
Nguni	NGNT	NGUN	NGUN10	AFS	African Sanga	Bos taurus/Bos indicus hybrid	South Africa	2000	Previously part of microsatellite study	Modern	1.51	38634614	38586571	38568354	4169356122	4167578180	4165313	24688.4	120	14.1437	394941	46.41	0.59	42.03	1.5111	99.8756
Somba	SOMB	SOMB	SOMB26	AFT	African taurine	Bos taurus	Togo	1992	Previously part of microsatellite study	Modern	1.51	36428866	36401559	36389718	4168357443	4166203137	6303056	15933.8	134	14.3037	197721	45.54	0.63	41.46	1.5107	99.925
Zebu_Peul	ZEBP	ZEBP	ZEBP04	AFS	African Sanga	Bos indicus	Burkina Faso	1992	Previously part of microsatellite study	Modern	1.51	33340668	33298146	33268300	4173962522	4171619953	2906513	17820.4	158	14.1616	18285	47.05	0.88	41.56	1.5128	99.8725
Afrikaner	AFRI	AFRI	AFRI42	AFS	African Sanga	Bos taurus/Bos indicus hybrid	South Africa	2022	University of Pretoria	Modern	1.5	43597628	43476786	43452288	4150747124	4149061402	5544063	36208.6	98	14.0669	130409	47.88	0.62	40.88	1.5044	99.7228
East_African_Short_Zebu	EASZ	EASZ	EASZ196	AZE	African Indicine Composite	Bos indicus	Kenya	Recent	Olivier Hanotte / Abdulfatai Tijjani	Modern	1.5	29393260	29257696	29236112	4140215039	4138203688	8751906	6546.75	214	15.3472	147236	48.26	0.74	41.29	1.5005	99.5388
Danakil	DANA	DANA	DANA06	AFI	African Indicine	Bos taurus/Bos indicus hybrid	Ethiopia	2000	Previously part of microsatellite study	Modern	1.5	36673302	36636468	36617530	4135819025	4133442785	3658839	35772.8	130	14.0696	384977	46.78	0.79	41.3	1.4989	99.8996
Somba	SOMB	SOMB	SOMB22	AFT	African taurine	Bos taurus	Togo	1992	Previously part of microsatellite study	Modern	1.5	33186626	33086060	33069226	4133044877	4131434799	6881160	17320.8	172	14.7631	196778	45.18	0.53	43.87	1.4979	99.697
East_African_Short_Zebu	EASZ	EASZ	EASZ150	AZE	African Indicine Composite	Bos indicus	Kenya	Recent	Olivier Hanotte / Abdulfatai Tijjani	Modern	1.49	28561270	28473756	28450878	4104827817	4103053814	8240305	7864.3	239	15.4785	145741	47.98	0.65	41.89	1.4877	99.6936
Muturu_Nigeria_1990s	MUTT	MUTT	MUTT28	AFT	African taurine	Bos taurus	Nigeria	1992	Previously part of microsatellite study	Modern	1.49	28264914	28027765	27822274	4116670855	4115129410	2182198	9635.24	334	15.1539	35507	43.06	2.62	42	1.492	99.161
East_African_Short_Zebu	EASZ	EASZ	EASZ001	AZE	African Indicine Composite	Bos indicus	Kenya	Recent	Olivier Hanotte / Abdulfatai Tijjani	Modern	1.48	28400400	28313927	28293384	4077813536	4076061924	7952852	7154.18	235	15.5812	145236	46.71	0.64	42.53	1.4779	99.6955
East_African_Short_Zebu	EASZ	EASZ	EASZ074	AZE	African Indicine Composite	Bos indicus	Kenya	Recent	Olivier Hanotte / Abdulfatai Tijjani	Modern	1.48	28533834	28428509	28407994	4080263901	4077580935	7548519	10217.4	240	14.9052	136704	46.8	0.9	41.29	1.4788	99.6309
East_African_Short_Zebu	EASZ	EASZ	EASZ208	AZE	African Indicine Composite	Bos indicus	Kenya	Recent	Olivier Hanotte / Abdulfatai Tijjani	Modern	1.48	28798488	28672779	28637528	4089258721	4086728155	8223444	8318.06	234	15.0203	143325	46.13	0.9	42.2	1.4821	99.5635
East_African_Short_Zebu	EASZ	EASZ	EASZ140	AZE	African Indicine Composite	Bos indicus	Kenya	Recent	Olivier Hanotte / Abdulfatai Tijjani	Modern	1.48	28723826	28615741	28595370	4071276891	4068609550	8225652	6989.19	220	14.931	143464	49.18	1	39.49	1.4756	99.6237
Bootse	BOOT	BOOT	BOOT04	AFS	African Sanga	Bos taurus/Bos indicus hybrid	Angola	2000	Previously part of microsatellite study	Modern	1.48	36236658	36200254	36181750	4095500957	4093698665	3452926	23574.9	130	14.1473	379701	46.21	0.6	42.54	1.4843	99.8995
Mbororo	MBOR	MBOR	MBOR45	AFS	African Sanga	Bos taurus/Bos indicus hybrid	Nigeria	1992	Previously part of microsatellite study	Modern	1.48	33028726	32987175	32961040	4087303310	4084769750	2769039	13196	160	14.4571	17449	47.56	0.96	38.75	1.4814	99.8742
East_African_Short_Zebu	EASZ	EASZ	EASZ107	AZE	African Indicine Composite	Bos indicus	Kenya	Recent	Olivier Hanotte / Abdulfatai Tijjani	Modern	1.47	28213432	28107941	28085402	4054964544	4052795394	8599003	6974.72	250	15.2196	143890	46.47	0.77	42.25	1.4696	99.6261
Namchi	NAMC	NAMC	NAMC38	AFT	African taurine	Bos taurus	Cameroon	1992	Previously part of microsatellite study	Modern	1.47	36310220	36246992	36204588	4064647747	4062840665	4752671	18010.5	127	13.9721	26387	46.29	0.69	40.06	1.4732	99.8259
Raya_Zebu	RYAT	RAYA	RAYA09	AFI	African Indicine	Bos taurus/Bos indicus hybrid	Ethiopia	2000	Previously part of microsatellite study	Modern	1.47	38428912	38388084	38371420	4056321583	4054011275	4432411	29733	116	14.0916	383597	46.53	0.76	41.53	1.4701	99.8938
Somba	SOMB	SOMB	SOMB35	AFT	African taurine	Bos taurus	Togo	1992	Previously part of microsatellite study	Modern	1.47	34435628	34406848	34393940	4057768277	4056241304	6179854	30998.5	145	14.2528	189292	45.38	0.47	42.93	1.4707	99.9164
Zebu_Gobra	ZEBG	ZEBG	ZEBG25	AFS	African Sanga	Bos indicus	Senegal	1992	Previously part of microsatellite study	Modern	1.47	31766808	31716987	31683600	4043874081	4041532061	2948620	13963.3	184	14.5123	17588	45.25	0.88	40.8	1.4656	99.8432
Afrikaner	AFRI	AFRI	AFRI05	AFS	African Sanga	Bos taurus/Bos indicus hybrid	South Africa	2000	Previously part of microsatellite study	Modern	1.46	33897128	33861683	33842952	4026676765	4024887998	2520862	31159.7	138	14.4538	367943	45.94	0.62	42.69	1.4594	99.8954
Borgou	BORG	BORG	BORG28	AFS	African Sanga	Bos taurus/Bos indicus hybrid	Benin	1992	Previously part of microsatellite study	Modern	1.46	29818578	29739967	29686510	4025517975	4023681405	2629837	8943.75	223	15.0227	93233	44.61	0.8	42.68	1.459	99.7364
Mbororo	MBOR	MBOR	MBOR08	AFS	African Sanga	Bos taurus/Bos indicus hybrid	Nigeria	1992	Previously part of microsatellite study	Modern	1.46	37099650	37050961	37019484	4037399577	4034847899	3857968	20888.5	118	13.815	16718	46.03	0.9	37.87	1.4633	99.8688
Tonga	TONG	TONG	TONG06	AFS	African Sanga	Bos taurus/Bos indicus hybrid	South Africa	2000	Previously part of microsatellite study	Modern	1.46	37277054	37235699	37215472	4036473454	4034656200	3461094	40616.1	121	14.0254	369855	46.54	0.63	41.72	1.4629	99.8891
Zebu_Gobra	ZEBG	ZEBG	ZEBG24	AFS	African Sanga	Bos indicus	Senegal	1992	Previously part of microsatellite study	Modern	1.46	32498120	32453731	32426530	4024477028	4022155220	2839550	14715.6	165	14.347	17325	45.35	0.81	40.97	1.4586	99.8634
East_African_Short_Zebu	EASZ	EASZ	EASZ105	AZE	African Indicine Composite	Bos indicus	Kenya	Recent	Olivier Hanotte / Abdulfatai Tijjani	Modern	1.45	27888774	27760126	27735360	3989696882	3987603386	8217495	9617.05	255	15.2779	140408	46.66	0.77	42.29	1.446	99.5387
East_African_Short_Zebu	EASZ	EASZ	EASZ143	AZE	African Indicine Composite	Bos indicus	Kenya	Recent	Olivier Hanotte / Abdulfatai Tijjani	Modern	1.45	32362430	28719171	28693544	3996015185	3993642359	8824548	8668.82	240	16.184	139201	48.27	0.93	41.29	1.4483	88.7423
Namchi	NAMC	NAMC	NAMC18	AFT	African taurine	Bos taurus	Cameroon	1992	Previously part of microsatellite study	Modern	1.45	33569706	33511436	33465932	4013075657	4011144610	4340990	13819.9	145	14.3507	25239	45.37	0.75	40.37	1.4545	99.8264
Somba	SOMB	SOMB	SOMB18	AFT	African taurine	Bos taurus	Togo	1992	Previously part of microsatellite study	Modern	1.45	34797496	34768299	34755514	3989447427	3987908654	6497213	19218.2	136	14.1358	190348	44.86	0.47	43.53	1.4459	99.9161
East_African_Short_Zebu	EASZ	EASZ	EASZ086	AZE	African Indicine Composite	Bos indicus	Kenya	Recent	Olivier Hanotte / Abdulfatai Tijjani	Modern	1.44	27881660	27775485	27745476	3965496602	3963133231	8214422	6463.81	225	15.0917	141008	47.04	0.87	42.06	1.4372	99.6192
East_African_Short_Zebu	EASZ	EASZ	EASZ201	AZE	African Indicine Composite	Bos indicus	Kenya	Recent	Olivier Hanotte / Abdulfatai Tijjani	Modern	1.44	27712532	27628002	27605230	3985374669	3983003465	8405235	9083.62	246	15.1312	139702	47.78	0.92	40.85	1.4444	99.695
Somba	SOMB	SOMB	SOMB34	AFT	African taurine	Bos taurus	Togo	1992	Previously part of microsatellite study	Modern	1.44	37881552	37859066	37847852	3983893080	3982468620	6887513	17624	110	13.8795	189737	46.36	0.44	41.25	1.4439	99.9406
Fogera	FOGE	FOGE	FOGE23	AFI	African Indicine	Bos taurus/Bos indicus hybrid	Ethiopia	1992	Previously part of microsatellite study	Modern	1.43	34803686	34765955	34747978	3938505979	3936254909	3459819	24607.7	131	14.1295	365890	46.65	0.79	41.88	1.4274	99.8916
Mbororo	MBOR	MBOR	MBOR36	AFS	African Sanga	Bos taurus/Bos indicus hybrid	Nigeria	1992	Previously part of microsatellite study	Modern	1.43	31592250	31561085	31542708	3935747283	3933404761	2601261	16113.1	168	14.3618	12018	47.54	1.1	39.47	1.4264	99.9014
Nguni	NGNT	NGUN	NGUN12	AFS	African Sanga	Bos taurus/Bos indicus hybrid	South Africa	2000	Previously part of microsatellite study	Modern	1.43	35249138	35209509	35190760	3955036008	3953380426	3291721	18288.2	127	14.1948	374216	46.36	0.58	42.57	1.4334	99.8876
Somba	SOMB	SOMB	SOMB51	AFT	African taurine	Bos taurus	Togo	1992	Previously part of microsatellite study	Modern	1.43	38173470	38146220	38132524	3949819706	3948004096	6747332	33320.5	110	13.7186	188289	47.47	0.61	39.91	1.4315	99.9286
Zebu_Malawi	ZEBM	ZEBM	ZEBM04	AFI	African Indicine	Bos indicus	Malawi	1992	Previously part of microsatellite study	Modern	1.43	31734142	31695691	31673210	3959102968	3956780270	2300497	20750.4	151	14.6383	363101	46.25	0.78	41.85	1.4349	99.8788
Bonsmara	BONS	BONS	BONS21	SAC	South African Composite	Bos taurus/Bos indicus hybrid	South Africa	2022	University of Pretoria	Modern	1.42	40657274	40609666	40589882	3929611095	3928256895	4617434	47264.1	101	13.7764	123097	47.47	0.54	41.71	1.4242	99.8829
East_African_Short_Zebu	EASZ	EASZ	EASZ012	AZE	African Indicine Composite	Bos indicus	Kenya	Recent	Olivier Hanotte / Abdulfatai Tijjani	Modern	1.42	27298912	27210309	27184338	3910478485	3908219066	7985934	6979.13	236	14.9758	136626	47.95	0.92	39.96	1.4173	99.6754
Arado	ARDT	ARAD	ARAD07	AFI	African Indicine	Bos taurus/Bos indicus hybrid	Ethiopia	2000	Previously part of microsatellite study	Modern	1.42	36497812	36460159	36441390	3925506519	3923267539	3909704	35292	119	13.8814	364769	46.43	0.76	41.9	1.4227	99.8968
NDama_Senegal_1990s	NDST	NDST	NDST28	AFT	African taurine	Bos taurus	Senegal	1992	Previously part of microsatellite study	Modern	1.42	33159284	33129712	33118090	3919947412	3918363276	6587751	28115.2	148	14.4212	189172	45.56	0.52	42.64	1.4207	99.9108
East_African_Short_Zebu	EASZ	EASZ	EASZ051	AZE	African Indicine Composite	Bos indicus	Kenya	Recent	Olivier Hanotte / Abdulfatai Tijjani	Modern	1.41	27331446	27227380	27205094	3890659120	3888789022	7658723	8555.13	230	15.6234	138308	46.99	0.71	41.84	1.4101	99.6192
East_African_Short_Zebu	EASZ	EASZ	EASZ207	AZE	African Indicine Composite	Bos indicus	Kenya	Recent	Olivier Hanotte / Abdulfatai Tijjani	Modern	1.41	27841552	27733320	27711826	3889723247	3887090541	8340249	6694.08	202	15.0036	139209	49.09	1.04	39.26	1.4098	99.6113
Mbororo	MBOR	MBOR	MBOR40	AFS	African Sanga	Bos taurus/Bos indicus hybrid	Nigeria	1992	Previously part of microsatellite study	Modern	1.41	32527180	32487071	32459438	3877696281	3875485978	3770673	32179.2	152	13.5943	17137	49.2	1.1	37.3	1.4054	99.8767
East_African_Short_Zebu	EASZ	EASZ	EASZ159	AZE	African Indicine Composite	Bos indicus	Kenya	Recent	Olivier Hanotte / Abdulfatai Tijjani	Modern	1.4	27017216	26882008	26861352	3850633865	3848284688	7730073	8985.46	234	15.1356	134990	47.38	0.86	41.77	1.3956	99.4995
East_African_Short_Zebu	EASZ	EASZ	EASZ085	AZE	African Indicine Composite	Bos indicus	Kenya	Recent	Olivier Hanotte / Abdulfatai Tijjani	Modern	1.4	27215436	27075316	27055464	3872190256	3870289387	7543321	6616.14	227	15.4148	139110	47.56	0.76	41.73	1.4034	99.4851
Arado	ARDT	ARAD	ARAD05	AFI	African Indicine	Bos taurus/Bos indicus hybrid	Ethiopia	2000	Previously part of microsatellite study	Modern	1.4	34713922	34680116	34661932	3872013376	3869802714	3572927	27557	128	13.9489	362028	46.77	0.78	41.83	1.4033	99.9026
Somba	SOMB	SOMB	SOMB16	AFT	African taurine	Bos taurus	Togo	1992	Previously part of microsatellite study	Modern	1.4	31145180	31119743	31107016	3853632148	3852111351	5654649	18322.6	159	14.3599	185095	45.06	0.52	43.3	1.3967	99.9183
East_African_Short_Zebu	EASZ	EASZ	EASZ142	AZE	African Indicine Composite	Bos indicus	Kenya	Recent	Olivier Hanotte / Abdulfatai Tijjani	Modern	1.39	27266054	27161049	27135490	3843057863	3841316921	6265051	7366.7	214	15.2358	130551	49.02	0.69	41.79	1.3928	99.6149
Fogera	FOGE	FOGE	FOGE11	AFI	African Indicine	Bos taurus/Bos indicus hybrid	Ethiopia	1992	Previously part of microsatellite study	Modern	1.39	33661752	33618811	33599788	3834639830	3832414995	3257855	29362.5	134	14.2586	350513	46.54	0.76	41.78	1.3898	99.8724
Namchi	NAMC	NAMC	NAMC34	AFT	African taurine	Bos taurus	Cameroon	1992	Previously part of microsatellite study	Modern	1.39	34846642	34805370	34779016	3829205274	3827393859	4821314	18309.3	120	13.8743	23726	46.4	0.71	39.07	1.3878	99.8816
Zebu_Gobra	ZEBG	ZEBG	ZEBG06	AFS	African Sanga	Bos indicus	Senegal	1992	Previously part of microsatellite study	Modern	1.39	29430272	29385207	29358150	3842652346	3840462062	2588405	10990.3	190	14.8036	16936	45.08	0.82	41.71	1.3927	99.8469
Zebu_Gobra	ZEBG	ZEBG	ZEBG16	AFS	African Sanga	Bos indicus	Senegal	1992	Previously part of microsatellite study	Modern	1.39	30087320	30053239	30033264	3822418971	3820086270	2634423	10899.4	174	14.6151	16970	45.04	0.84	40.47	1.3854	99.8867
East_African_Short_Zebu	EASZ	EASZ	EASZ055	AZE	African Indicine Composite	Bos indicus	Kenya	Recent	Olivier Hanotte / Abdulfatai Tijjani	Modern	1.38	26701016	26585429	26558668	3813066648	3811396458	7298884	7813.34	261	15.1892	134191	47.42	0.7	42.28	1.382	99.5671
Fogera	FOGE	FOGE	FOGE22	AFI	African Indicine	Bos taurus/Bos indicus hybrid	Ethiopia	1992	Previously part of microsatellite study	Modern	1.38	33811068	33775902	33760640	3803474058	3801303312	3232651	36239.2	130	14.1352	356177	46.45	0.77	41.88	1.3785	99.896
Mbororo	MBOR	MBOR	MBOR37	AFS	African Sanga	Bos taurus/Bos indicus hybrid	Nigeria	1992	Previously part of microsatellite study	Modern	1.38	32180390	32147397	32125134	3817554730	3815525665	3494823	25975.3	150	13.9411	16216	49.68	0.93	39.24	1.3836	99.8975
Mbororo	MBOR	MBOR	MBOR42	AFS	African Sanga	Bos taurus/Bos indicus hybrid	Nigeria	1992	Previously part of microsatellite study	Modern	1.38	31406188	31365971	31337000	3801870170	3799710107	3348720	25742.7	152	13.8234	15478	49.34	1.12	37.49	1.3779	99.8719
Sheko	SHKT	SHEK	SHEK12	AFS	African Sanga	Bos taurus/Bos indicus hybrid	Ethiopia	2000	Previously part of microsatellite study	Modern	1.38	36279026	36249010	36231678	3810031791	3808205268	4088431	47705.6	115	13.8671	356108	49.24	0.71	39.72	1.3809	99.9173
Somba	SOMB	SOMB	SOMB42	AFT	African taurine	Bos taurus	Togo	1992	Previously part of microsatellite study	Modern	1.38	30326538	30301125	30289872	3794267930	3792307460	5501747	13691.4	168	14.551	182684	44.7	0.67	42.8	1.3752	99.9162
East_African_Short_Zebu	EASZ	EASZ	EASZ242	AZE	African Indicine Composite	Bos indicus	Kenya	Recent	Olivier Hanotte / Abdulfatai Tijjani	Modern	1.37	26720634	26582311	26560546	3770737521	3768321633	7958569	10188	217	15.0101	131610	46.63	0.93	42.11	1.3666	99.4823
Arado	ARDT	ARAD	ARAD08	AFI	African Indicine	Bos taurus/Bos indicus hybrid	Ethiopia	2000	Previously part of microsatellite study	Modern	1.37	40833218	40791761	40770082	3778034874	3776149657	5372712	83083	96	13.3994	355009	47.91	0.72	40.05	1.3693	99.8985
Kilimanjaro_Zebu	KILI	KILI	KILI04	AFI	African Indicine	Bos indicus	Tanzania	2000	Previously part of microsatellite study	Modern	1.37	33395562	33365146	33351016	3787760435	3785694373	3330837	25176.3	131	14.0709	352264	46.53	0.78	41.96	1.3728	99.9089
NDama_Senegal_1990s	NDST	NDST	NDST47	AFT	African taurine	Bos taurus	Senegal	1992	Previously part of microsatellite study	Modern	1.37	30981894	30957735	30945778	3776517867	3774989799	6255184	13207.3	158	14.604	179182	45.4	0.53	43.21	1.3687	99.922
NDama_Senegal_1990s	NDST	NDST	NDST52	AFT	African taurine	Bos taurus	Senegal	1992	Previously part of microsatellite study	Modern	1.37	31499504	31469528	31457958	3775125806	3773523840	5859640	13113.8	146	14.3001	180503	44.69	0.53	43.3	1.3682	99.9048
Somba	SOMB	SOMB	SOMB44	AFT	African taurine	Bos taurus	Togo	1992	Previously part of microsatellite study	Modern	1.36	35653366	35631423	35619982	3750671466	3749064531	5658392	28168.1	111	13.6995	174334	46.9	0.55	40.97	1.3594	99.9385
East_African_Short_Zebu	EASZ	EASZ	EASZ166	AZE	African Indicine Composite	Bos indicus	Kenya	Recent	Olivier Hanotte / Abdulfatai Tijjani	Modern	1.35	25862022	25779837	25757500	3725304784	3722823110	6298616	8567.85	246	15.0515	126363	48	0.93	40.19	1.3502	99.6822
East_African_Short_Zebu	EASZ	EASZ	EASZ033	AZE	African Indicine Composite	Bos indicus	Kenya	Recent	Olivier Hanotte / Abdulfatai Tijjani	Modern	1.35	26201460	26112995	26092964	3724976847	3723587345	7667177	5851.01	232	15.4695	132291	47.3	0.58	43.2	1.35	99.6624
East_African_Short_Zebu	EASZ	EASZ	EASZ200	AZE	African Indicine Composite	Bos indicus	Kenya	Recent	Olivier Hanotte / Abdulfatai Tijjani	Modern	1.35	25659190	25581324	25560438	3720583148	3718313534	7537562	9535.33	266	15.1099	131708	46.48	0.91	41.81	1.3485	99.6965
East_African_Short_Zebu	EASZ	EASZ	EASZ119	AZE	African Indicine Composite	Bos indicus	Kenya	Recent	Olivier Hanotte / Abdulfatai Tijjani	Modern	1.35	26284864	26185711	26165342	3737684419	3735508656	7898313	8772.62	225	15.0602	132695	46.92	0.83	41.66	1.3546	99.6228
East_African_Short_Zebu	EASZ	EASZ	EASZ121	AZE	African Indicine Composite	Bos indicus	Kenya	Recent	Olivier Hanotte / Abdulfatai Tijjani	Modern	1.35	26379128	26243843	26224090	3728823834	3726550389	7459606	9515.66	220	15.1318	134488	47.83	0.86	40.86	1.3514	99.4872
East_African_Short_Zebu	EASZ	EASZ	EASZ077	AZE	African Indicine Composite	Bos indicus	Kenya	Recent	Olivier Hanotte / Abdulfatai Tijjani	Modern	1.34	25953160	25864779	25846978	3707830838	3705805958	7895427	7133.15	229	15.2817	131415	44.99	0.72	43.36	1.3438	99.6595
East_African_Short_Zebu	EASZ	EASZ	EASZ235	AZE	African Indicine Composite	Bos indicus	Kenya	Recent	Olivier Hanotte / Abdulfatai Tijjani	Modern	1.34	25551936	25462999	25441438	3689358107	3687983269	7839060	5689.1	265	15.7965	130217	46.49	0.66	43.73	1.3371	99.6519
Baoule_IvoryCoast_1990s	BICT	BICT	BICT18	AFT	African taurine	Bos taurus	Ivory Coast	1992	Previously part of microsatellite study	Modern	1.34	31533886	31508899	31495726	3695029478	3693518140	4374665	20041.9	137	14.1682	93298	46.22	0.59	42.45	1.3392	99.9208
Blonde	BLON	BLON	BLON05	NAT	North African taurine	Bos taurus	Morroco	1992	Previously part of microsatellite study	Modern	1.34	33334922	33293298	33271988	3707570437	3706389021	3390752	24630.7	127	14.3438	336511	49.06	0.5	42.58	1.3437	99.8751
Fogera	FOGE	FOGE	FOGE14	AFI	African Indicine	Bos taurus/Bos indicus hybrid	Ethiopia	1992	Previously part of microsatellite study	Modern	1.34	32783320	32748335	32730184	3693591322	3691495522	3160619	36996.2	132	14.0261	341867	46.62	0.79	41.54	1.3387	99.8933
Kapsiki	KAPS	KAPS	KAPS49	AFT	African taurine	Bos taurus	Nigeria	1992	Previously part of microsatellite study	Modern	1.34	31823078	31780327	31752840	3701337256	3699192012	4386995	17636.3	139	14.1246	93140	45.78	0.77	38.79	1.3415	99.8657
Kavirondo	KAVI	KAVI	KAVI04	AFI	African Indicine	Bos indicus	Kenya	2000	Previously part of microsatellite study	Modern	1.34	33117298	33076476	33063062	3698776529	3696712546	3253792	22609.9	128	14.324	346323	46.32	0.72	42.18	1.3405	99.8767
Namchi	NAMC	NAMC	NAMC04	AFT	African taurine	Bos taurus	Cameroon	1992	Previously part of microsatellite study	Modern	1.34	30125330	30078361	30051652	3697652818	3695743277	3683432	13822.5	160	14.4551	21883	45.8	0.87	38.9	1.3401	99.8441
Zebu_Maure	ZBMT	ZBMA	ZBMA16	AFS	African Sanga	Bos indicus	Mauritania	1992	Previously part of microsatellite study	Modern	1.34	30347762	30312794	30290080	3701929198	3699866050	3439136	15539	159	14.3201	15362	46.83	0.87	40.82	1.3417	99.8848
Mbororo	MBOR	MBOR	MBOR05	AFS	African Sanga	Bos taurus/Bos indicus hybrid	Nigeria	1992	Previously part of microsatellite study	Modern	1.33	32169530	32134211	32116708	3660484183	3658248333	2688818	18742.6	129	14.0384	11962	46.12	1.04	38.1	1.3267	99.8902
NDama_Senegal_1990s	NDST	NDST	NDST29	AFT	African taurine	Bos taurus	Senegal	1992	Previously part of microsatellite study	Modern	1.33	30264548	30234716	30222746	3663963902	3662469578	5426260	23969.2	152	14.378	174793	45.56	0.53	42.98	1.3279	99.9014
East_African_Short_Zebu	EASZ	EASZ	EASZ075	AZE	African Indicine Composite	Bos indicus	Kenya	Recent	Olivier Hanotte / Abdulfatai Tijjani	Modern	1.32	25968446	25858687	25836202	3654309099	3651953829	7495059	10035.9	215	14.9913	130868	48.15	1.02	40.3	1.3244	99.5773
NDama_Senegal_1990s	NDST	NDST	NDST26	AFT	African taurine	Bos taurus	Senegal	1992	Previously part of microsatellite study	Modern	1.32	30346836	30316117	30304742	3640447986	3638916135	5589347	25702.6	151	14.4684	174528	44.73	0.53	43.62	1.3194	99.8988
Somba	SOMB	SOMB	SOMB60	AFT	African taurine	Bos taurus	Benin	1992	Previously part of microsatellite study	Modern	1.32	30169578	30146137	30134606	3631516335	3630110184	4941900	15792.8	149	14.478	173311	45.13	0.49	43.42	1.3162	99.9223
Arado	ARDT	ARAD	ARAD04	AFI	African Indicine	Bos taurus/Bos indicus hybrid	Ethiopia	2000	Previously part of microsatellite study	Modern	1.31	32333878	32299952	32283348	3609298644	3607201560	3222054	36183.3	128	14.087	335150	46.5	0.79	41.41	1.3081	99.8951
Baoule_IvoryCoast_1990s	BICT	BICT	BICT09	AFT	African taurine	Bos taurus	Ivory Coast	1992	Previously part of microsatellite study	Modern	1.31	31114928	31088571	31075770	3628366701	3627025251	4151134	15878.1	136	14.3978	90974	45.19	0.52	43.31	1.315	99.9153
Danakil	DANA	DANA	DANA11	AFI	African Indicine	Bos taurus/Bos indicus hybrid	Ethiopia	2000	Previously part of microsatellite study	Modern	1.31	32470566	32434390	32415998	3611818190	3609782037	3453935	24043.5	128	14.1553	341603	46.65	0.8	41.85	1.309	99.8886
Danakil	DANA	DANA	DANA12	AFI	African Indicine	Bos taurus/Bos indicus hybrid	Ethiopia	2000	Previously part of microsatellite study	Modern	1.31	30450324	30409665	30391310	3607916227	3605799722	2597665	25079.6	137	14.2969	334568	46.8	0.86	41.35	1.3076	99.8665
Somba	SOMB	SOMB	SOMB43	AFT	African taurine	Bos taurus	Togo	1992	Previously part of microsatellite study	Modern	1.31	29131706	29107766	29095938	3623273588	3621319358	5594473	14503.2	169	14.4909	172063	44.98	0.65	42.19	1.3132	99.9178
Somba	SOMB	SOMB	SOMB56	AFT	African taurine	Bos taurus	Benin	1992	Previously part of microsatellite study	Modern	1.31	30634768	30611487	30599226	3608459951	3607024239	5171376	21909.3	140	14.3082	171772	45.37	0.49	41.64	1.3078	99.924
Tuli	TULI	TULI	TULI15	SAC	South African Composite	Bos taurus/Bos indicus hybrid	South Africa	2022	University of Pretoria	Modern	1.31	33480360	33452821	33441212	3621461562	3620131548	3475330	26757.7	121	14.096	38443	46.52	0.88	42.04	1.3125	99.9177
East_African_Short_Zebu	EASZ	EASZ	EASZ083	AZE	African Indicine Composite	Bos indicus	Kenya	Recent	Olivier Hanotte / Abdulfatai Tijjani	Modern	1.3	25259790	25164156	25147770	3573757596	3572005618	7163718	8729.12	220	15.1749	127083	47.72	0.72	41.56	1.2952	99.6214
Afrikaner	AFRI	AFRI	AFRI22	AFS	African Sanga	Bos taurus/Bos indicus hybrid	South Africa	2022	University of Pretoria	Modern	1.29	36144244	36076461	36056854	3566640569	3565134092	3929133	29476.1	102	13.9437	110811	47.44	0.66	40.73	1.2927	99.8125
East_African_Short_Zebu	EASZ	EASZ	EASZ180	AZE	African Indicine Composite	Bos indicus	Kenya	Recent	Olivier Hanotte / Abdulfatai Tijjani	Modern	1.29	24894784	24810953	24788262	3570183361	3568247414	5908052	9722.03	242	15.1243	120862	46.87	0.8	42.12	1.2939	99.6633
East_African_Short_Zebu	EASZ	EASZ	EASZ076	AZE	African Indicine Composite	Bos indicus	Kenya	Recent	Olivier Hanotte / Abdulfatai Tijjani	Modern	1.29	24933084	24842068	24820684	3560140407	3557726460	7161964	10470.1	232	15.001	125546	47.38	0.94	41.27	1.2903	99.635
East_African_Short_Zebu	EASZ	EASZ	EASZ131	AZE	African Indicine Composite	Bos indicus	Kenya	Recent	Olivier Hanotte / Abdulfatai Tijjani	Modern	1.29	25130918	25046715	25030022	3550638066	3549118746	7189985	5343.07	210	15.2661	125653	47.76	0.67	41.51	1.2869	99.6649
Barotse	BARO	BARO	BARO04	AFS	African Sanga	Bos taurus/Bos indicus hybrid	Angola	2000	Previously part of microsatellite study	Modern	1.29	32217536	32184749	32169256	3567178946	3565651425	3301470	23384.9	126	14.0591	326977	46.36	0.59	42.63	1.2929	99.8982
Borgou	BORG	BORG	BORG08	AFS	African Sanga	Bos taurus/Bos indicus hybrid	Benin	1992	Previously part of microsatellite study	Modern	1.29	27305884	27256904	27224768	3564323075	3562480582	3551832	11343.6	204	14.7747	90648	45.09	0.89	41.67	1.2918	99.8206
Mbororo	MBOR	MBOR	MBOR09	AFS	African Sanga	Bos taurus/Bos indicus hybrid	Nigeria	1992	Previously part of microsatellite study	Modern	1.29	32507042	32472608	32450542	3573123420	3570981463	3551616	20285.7	121	13.8235	14941	46.59	0.91	38.17	1.295	99.8941
NDama_Senegal_1990s	NDST	NDST	NDST30	AFT	African taurine	Bos taurus	Senegal	1992	Previously part of microsatellite study	Modern	1.29	29207032	29178862	29165620	3559495532	3558048785	5234035	27162.9	159	14.4675	171494	45.89	0.58	42.51	1.2901	99.9036
Somba	SOMB	SOMB	SOMB33	AFT	African taurine	Bos taurus	Togo	1992	Previously part of microsatellite study	Modern	1.29	30475012	30450621	30440148	3562561315	3561204768	5210472	17965.2	138	14.145	169912	43.94	0.44	44.15	1.2912	99.92
Afrikaner	AFRI	AFRI	AFRI41	AFS	African Sanga	Bos taurus/Bos indicus hybrid	South Africa	2022	University of Pretoria	Modern	1.28	34098172	34054412	34039562	3527986849	3526470648	3103331	26885.4	110	14.0081	105869	46.52	0.71	41.5	1.2786	99.8717
East_African_Short_Zebu	EASZ	EASZ	EASZ177	AZE	African Indicine Composite	Bos indicus	Kenya	Recent	Olivier Hanotte / Abdulfatai Tijjani	Modern	1.28	24600678	24510027	24488402	3528981715	3526701692	7413463	7913.79	238	14.9045	123423	46.16	0.91	42.23	1.279	99.6315
East_African_Short_Zebu	EASZ	EASZ	EASZ233	AZE	African Indicine Composite	Bos indicus	Kenya	Recent	Olivier Hanotte / Abdulfatai Tijjani	Modern	1.28	24544034	24366330	24340500	3530113916	3527623386	7357707	13969.4	274	14.8678	124556	47.73	1.05	40.11	1.2794	99.276
Baoule_IvoryCoast_1990s	BICT	BICT	BICT23	AFT	African taurine	Bos taurus	Ivory Coast	1992	Previously part of microsatellite study	Modern	1.28	31165412	31141112	31129458	3537321969	3535987756	4409880	17530.2	130	14.2051	88353	45.66	0.51	42.88	1.282	99.922
Danakil	DANA	DANA	DANA04	AFI	African Indicine	Bos taurus/Bos indicus hybrid	Ethiopia	2000	Previously part of microsatellite study	Modern	1.28	31855400	31825067	31810532	3531918143	3529909652	3218605	22628.4	125	14.0447	328320	46.51	0.78	41.54	1.2801	99.9048
East_African_Short_Zebu	EASZ	EASZ	EASZ211	AZE	African Indicine Composite	Bos indicus	Kenya	Recent	Olivier Hanotte / Abdulfatai Tijjani	Modern	1.27	24608166	24492619	24470468	3515807703	3513530205	7109352	7554.46	254	15.1059	124165	46.93	0.93	40.99	1.2742	99.5305
East_African_Short_Zebu	EASZ	EASZ	EASZ226	AZE	African Indicine Composite	Bos indicus	Kenya	Recent	Olivier Hanotte / Abdulfatai Tijjani	Modern	1.27	24470446	24378520	24362124	3492789769	3490870428	7097049	6770.7	229	15.1649	122780	47.59	0.79	41.94	1.2659	99.6243
Danakil	DANA	DANA	DANA16	AFI	African Indicine	Bos taurus/Bos indicus hybrid	Ethiopia	2000	Previously part of microsatellite study	Modern	1.27	32015388	31977166	31960686	3515836147	3513825461	3416483	31162.4	126	14.026	323887	48.06	0.81	40.79	1.2742	99.8806
NDama_Senegal_1990s	NDST	NDST	NDST46	AFT	African taurine	Bos taurus	Senegal	1992	Previously part of microsatellite study	Modern	1.27	29493954	29469305	29458732	3491282401	3489885274	5093526	13661.2	140	14.2764	165352	44.75	0.53	43.72	1.2653	99.9164
Somba	SOMB	SOMB	SOMB55	AFT	African taurine	Bos taurus	Togo	1992	Previously part of microsatellite study	Modern	1.27	28920874	28895353	28884260	3496198210	3494384841	5080614	23288.1	151	14.2331	165651	45.33	0.64	41.59	1.2671	99.9118
Zebu_Gobra	ZEBG	ZEBG	ZEBG22	AFS	African Sanga	Bos indicus	Senegal	1992	Previously part of microsatellite study	Modern	1.27	28010836	27985547	27970870	3517953337	3515848904	2345658	13555.3	169	14.4778	15372	45.33	0.82	40.41	1.275	99.9097
East_African_Short_Zebu	EASZ	EASZ	EASZ152	AZE	African Indicine Composite	Bos indicus	Kenya	Recent	Olivier Hanotte / Abdulfatai Tijjani	Modern	1.26	24105186	24008895	23987816	3469632534	3467341260	6978661	10479.7	265	15.0596	122883	46.69	0.93	41.39	1.2575	99.6005
Baoule_BurkinaFaso_1990s	BBFT	BBFT	BBFT10	AFT	African taurine	Bos taurus	Burkina Faso	1992	Previously part of microsatellite study	Modern	1.26	32137224	32114688	32101790	3473318640	3472073164	5065749	39659.4	122	13.3478	88443	50.38	0.63	38.91	1.2588	99.9299
Djakkore_Kolda_1990s	DJKT	DJKT	DJKT07	AFT	African taurine	Bos taurus/Bos indicus hybrid	Senegal	1992	Previously part of microsatellite study	Modern	1.26	31105812	31081239	31070990	3463271961	3461898151	4354599	21672.8	126	14.241	88356	45.77	0.52	43.71	1.2552	99.921
Fogera	FOGE	FOGE	FOGE16	AFI	African Indicine	Bos taurus/Bos indicus hybrid	Ethiopia	1992	Previously part of microsatellite study	Modern	1.26	30819848	30785507	30768822	3481630935	3479650296	3071021	27300.8	132	14.2239	324700	46.25	0.76	42.03	1.2618	99.8886
NDama_Senegal_1990s	NDST	NDST	NDST48	AFT	African taurine	Bos taurus	Senegal	1992	Previously part of microsatellite study	Modern	1.26	29983884	29956728	29945142	3467973981	3466562714	5235726	17751.6	137	14.2832	163586	44.9	0.58	43.61	1.2569	99.9094
East_African_Short_Zebu	EASZ	EASZ	EASZ031	AZE	African Indicine Composite	Bos indicus	Kenya	Recent	Olivier Hanotte / Abdulfatai Tijjani	Modern	1.25	24400510	24195503	24175808	3452744015	3450468822	7000129	8086.91	237	15.062	121731	48.52	0.95	40.5	1.2514	99.1598
East_African_Short_Zebu	EASZ	EASZ	EASZ130	AZE	African Indicine Composite	Bos indicus	Kenya	Recent	Olivier Hanotte / Abdulfatai Tijjani	Modern	1.25	24494700	24407873	24393174	3445535800	3443862448	6977019	6508.05	208	15.1941	121780	47.4	0.69	42.08	1.2488	99.6455
Blonde	BLON	BLON	BLON04	NAT	North African taurine	Bos taurus	Morroco	1992	Previously part of microsatellite study	Modern	1.25	30035404	30004488	29986188	3461823504	3460674763	2390092	31213	134	14.31	313667	46.4	0.51	42.65	1.2547	99.8971
NDama_Senegal_1990s	NDST	NDST	NDST24	AFT	African taurine	Bos taurus	Senegal	1992	Previously part of microsatellite study	Modern	1.25	29695810	29668446	29657778	3462356542	3461039243	5348751	17768.2	140	14.3822	166396	46.21	0.53	42.57	1.2549	99.9079
Somba	SOMB	SOMB	SOMB53	AFT	African taurine	Bos taurus	Togo	1992	Previously part of microsatellite study	Modern	1.25	27756058	27733330	27721342	3446292840	3444336065	5258674	14515.1	162	14.5261	164464	45.61	0.7	41.87	1.249	99.9181
Zebu_Peul	ZEBP	ZEBP	ZEBP12	AFS	African Sanga	Bos indicus	Burkina Faso	1992	Previously part of microsatellite study	Modern	1.25	27638934	27609611	27591078	3456221307	3454343553	2204003	15667.8	158	14.2367	13798	46.54	0.86	41.72	1.2526	99.8939
Baoule_BurkinaFaso_1990s	BBFT	BBFT	BBFT14	AFT	African taurine	Bos taurus	Burkina Faso	1992	Previously part of microsatellite study	Modern	1.24	30704964	30681508	30669262	3413041515	3411793038	4578811	31738.1	129	13.7801	85041	49.45	0.6	40.19	1.237	99.9236
Fogera	FOGE	FOGE	FOGE20	AFI	African Indicine	Bos taurus/Bos indicus hybrid	Ethiopia	1992	Previously part of microsatellite study	Modern	1.24	30869440	30839745	30825228	3416090158	3414141780	2914681	25875.5	126	14.0944	317935	46.65	0.77	41.49	1.2381	99.9038
Raya_Zebu	RYAT	RAYA	RAYA08	AFI	African Indicine	Bos taurus/Bos indicus hybrid	Ethiopia	2000	Previously part of microsatellite study	Modern	1.24	29433100	29404772	29389404	3423360353	3421362552	2536165	28827.3	136	14.1159	317520	46.38	0.78	41.79	1.2407	99.9038
Tonga	TONG	TONG	TONG05	AFS	African Sanga	Bos taurus/Bos indicus hybrid	South Africa	2000	Previously part of microsatellite study	Modern	1.24	28247940	28221716	28206256	3416711054	3415089315	2245863	17323.5	143	14.4644	314444	45.97	0.66	42.61	1.2383	99.9072
Zebu_Peul	ZEBP	ZEBP	ZEBP13	AFS	African Sanga	Bos indicus	Burkina Faso	1992	Previously part of microsatellite study	Modern	1.24	27064116	27018571	26983536	3427450603	3425535182	2198748	16179.1	162	14.2257	13992	46.91	0.91	41.88	1.2422	99.8317
East_African_Short_Zebu	EASZ	EASZ	EASZ057	AZE	African Indicine Composite	Bos indicus	Kenya	Recent	Olivier Hanotte / Abdulfatai Tijjani	Modern	1.23	24021042	23920310	23900198	3390666944	3389253861	5496025	6595.19	223	15.5992	114890	46.54	0.63	42.43	1.2289	99.5807
Mbororo	MBOR	MBOR	MBOR18	AFS	African Sanga	Bos taurus/Bos indicus hybrid	Nigeria	1992	Previously part of microsatellite study	Modern	1.23	30529042	30486865	30460128	3384795643	3382739131	3175789	23636.3	126	13.9358	14142	46.5	0.87	38.64	1.2268	99.8618
Afrikaner	AFRI	AFRI	AFRI46	AFS	African Sanga	Bos taurus/Bos indicus hybrid	South Africa	2022	University of Pretoria	Modern	1.22	34483134	34309959	34290104	3358870978	3357488238	3707459	26979.9	100	14.4088	105202	47.58	0.64	40.87	1.2174	99.4978
Bonsmara	BONS	BONS	BONS11	SAC	South African Composite	Bos taurus/Bos indicus hybrid	South Africa	2022	University of Pretoria	Modern	1.22	34978438	34893724	34872690	3371545366	3370310481	3906046	35251.6	98	13.8746	104621	48.17	0.58	40.91	1.2219	99.7578
East_African_Short_Zebu	EASZ	EASZ	EASZ124	AZE	African Indicine Composite	Bos indicus	Kenya	Recent	Olivier Hanotte / Abdulfatai Tijjani	Modern	1.22	23559552	23472446	23454814	3353209637	3351836758	6427208	7048.76	224	15.6104	117345	48.43	0.62	42.1	1.2153	99.6303
Baoule_IvoryCoast_1990s	BICT	BICT	BICT10	AFT	African taurine	Bos taurus	Ivory Coast	1992	Previously part of microsatellite study	Modern	1.22	29944154	29921956	29909770	3372910228	3371641107	4275245	21624.2	128	14.2642	83246	46.44	0.54	42.27	1.2224	99.9259
Djakkore_SouthSenegal_1990s	DJSS	DJSS	DJSS10	AFT	African taurine	Bos taurus/Bos indicus hybrid	South Senegal	1992	Previously part of microsatellite study	Modern	1.22	31587712	31563356	31551234	3365382436	3364150933	5120716	25684.7	120	14.0511	81368	46.52	0.5	43.26	1.2197	99.9229
Somba	SOMB	SOMB	SOMB15	AFT	African taurine	Bos taurus	Togo	1992	Previously part of microsatellite study	Modern	1.22	26726612	26705015	26695764	3364638121	3363258414	5157045	17997.6	177	14.6315	163275	45.04	0.55	43.25	1.2194	99.9192
Zebu_Gobra	ZEBG	ZEBG	ZEBG43	AFS	African Sanga	Bos indicus	Senegal	1992	Previously part of microsatellite study	Modern	1.22	26429092	26396704	26377746	3355638804	3353547047	2763423	14079	177	14.418	15057	45.06	0.84	39.98	1.2162	99.8775
Afrikaner	AFRI	AFRI	AFRI18	AFS	African Sanga	Bos taurus/Bos indicus hybrid	South Africa	2022	University of Pretoria	Modern	1.21	36460128	36418184	36399632	3334722917	3333448070	4671517	76493.8	95	13.4599	104339	48.45	0.63	39.62	1.2086	99.885
Afrikaner	AFRI	AFRI	AFRI27	AFS	African Sanga	Bos taurus/Bos indicus hybrid	South Africa	2022	University of Pretoria	Modern	1.21	33934946	33904786	33888324	3342795012	3341520032	3893848	73961.6	106	13.4944	106044	48	0.65	40.14	1.2115	99.9111
East_African_Short_Zebu	EASZ	EASZ	EASZ153	AZE	African Indicine Composite	Bos indicus	Kenya	Recent	Olivier Hanotte / Abdulfatai Tijjani	Modern	1.21	23630502	23546561	23529260	3325375068	3323565955	7262661	7316.82	209	15.1643	119445	46.69	0.79	42.09	1.2052	99.6448
Namchi	NAMC	NAMC	NAMC17	AFT	African taurine	Bos taurus	Cameroon	1992	Previously part of microsatellite study	Modern	1.21	28214704	28188707	28171936	3330018090	3328467586	3562109	15371.4	140	14.1411	20951	46.08	0.7	39.97	1.2069	99.9079
NDama_Nigeria_1990s	NDNT	NDNT	NDNT11	AFT	African taurine	Bos taurus	Nigeria	1992	Previously part of microsatellite study	Modern	1.21	27142414	27107387	27088196	3352068539	3350764229	2107908	12085.5	159	14.6421	14983	44.88	0.59	43.44	1.2149	99.871
NDama_Senegal_1990s	NDST	NDST	NDST38	AFT	African taurine	Bos taurus	Senegal	1992	Previously part of microsatellite study	Modern	1.21	27630130	27588625	27573266	3332734860	3331260669	5078392	25364.6	156	14.5437	161091	43.39	0.53	45.16	1.2079	99.8498
Somba	SOMB	SOMB	SOMB11	AFT	African taurine	Bos taurus	Togo	1992	Previously part of microsatellite study	Modern	1.21	26151760	26125895	26114762	3331220872	3329221370	5182465	13054.1	179	14.6734	157778	44.78	0.75	41.69	1.2073	99.9011
Somba	SOMB	SOMB	SOMB17	AFT	African taurine	Bos taurus	Togo	1992	Previously part of microsatellite study	Modern	1.21	27222800	27197895	27186456	3342857945	3341547528	5073887	20450.7	159	14.4945	160285	45.37	0.54	43.08	1.2116	99.9085
Bonsmara	BONS	BONS	BONS24	SAC	South African Composite	Bos taurus/Bos indicus hybrid	South Africa	2022	University of Pretoria	Modern	1.2	31680024	31657447	31645998	3308181580	3306957627	2737638	30778.9	112	13.8566	96349	47.16	0.64	41.79	1.199	99.9287
Bonsmara	BONS	BONS	BONS41	SAC	South African Composite	Bos taurus/Bos indicus hybrid	South Africa	2022	University of Pretoria	Modern	1.2	23837744	23807977	23794946	3324243581	3322930206	359391	19178.1	214	14.9404	25324	44.32	1.73	42.13	1.2048	99.8751
East_African_Short_Zebu	EASZ	EASZ	EASZ168	AZE	African Indicine Composite	Bos indicus	Kenya	Recent	Olivier Hanotte / Abdulfatai Tijjani	Modern	1.2	23168498	23071588	23049638	3319169877	3316865764	5702776	10161.4	266	14.9402	112439	47.83	1.01	40.45	1.203	99.5817
Borgou	BORG	BORG	BORG12	AFS	African Sanga	Bos taurus/Bos indicus hybrid	Benin	1992	Previously part of microsatellite study	Modern	1.2	24622230	24568955	24532056	3301152386	3299418428	3020195	10660.4	228	14.7934	84740	44.42	0.84	41.8	1.1964	99.7836
Somba	SOMB	SOMB	SOMB40	AFT	African taurine	Bos taurus	Togo	1992	Previously part of microsatellite study	Modern	1.2	28020908	27998055	27986874	3319828518	3318251371	5482338	16329.9	149	14.2654	158990	45.58	0.6	42.15	1.2032	99.9184
Somba	SOMB	SOMB	SOMB59	AFT	African taurine	Bos taurus	Benin	1992	Previously part of microsatellite study	Modern	1.2	27373100	27349607	27339296	3298840971	3297499823	4848697	31074.7	153	14.3888	159205	45.71	0.53	40.99	1.1956	99.9142
Zebu_Maure	ZBMT	ZBMA	ZBMA15	AFS	African Sanga	Bos indicus	Mauritania	1992	Previously part of microsatellite study	Modern	1.2	27927088	27887071	27858208	3301849037	3299921108	2472343	16168.5	142	14.1336	13354	45.55	0.87	41.11	1.1967	99.8567
Zebu_Peul	ZEBP	ZEBP	ZEBP23	AFS	African Sanga	Bos indicus	Burkina Faso	1992	Previously part of microsatellite study	Modern	1.2	27093134	27065808	27049068	3299615942	3297806642	2331090	19920.3	153	13.999	14606	47.36	0.87	41.38	1.1959	99.8991
Borgou	BORG	BORG	BORG48	AFS	African Sanga	Bos taurus/Bos indicus hybrid	Benin	1992	Previously part of microsatellite study	Modern	1.19	24394548	24357009	24333018	3277546892	3275765573	3023217	11017.5	220	14.8083	82421	44.6	0.95	41.49	1.1879	99.8461
Djakkore_SouthSenegal_1990s	DJSS	DJSS	DJSS03	AFT	African taurine	Bos taurus/Bos indicus hybrid	South Senegal	1992	Previously part of microsatellite study	Modern	1.19	28466242	28436376	28426442	3294498529	3293163689	3613327	21251.8	136	14.2412	82838	46.73	0.57	41.81	1.194	99.8951
Mbororo	MBOR	MBOR	MBOR38	AFS	African Sanga	Bos taurus/Bos indicus hybrid	Nigeria	1992	Previously part of microsatellite study	Modern	1.19	27744436	27721373	27705796	3274860459	3273049519	3022394	24453.1	146	13.8829	13523	49.88	1.05	37.49	1.1869	99.9169
NDama_Senegal_1990s	NDST	NDST	NDST37	AFT	African taurine	Bos taurus	Senegal	1992	Previously part of microsatellite study	Modern	1.19	27502044	27470211	27457516	3280351013	3278976488	4932235	42221.4	156	14.4304	155010	45.99	0.6	41.92	1.1889	99.8843
NDama_Senegal_1990s	NDST	NDST	NDST58	AFT	African taurine	Bos taurus	Senegal	1992	Previously part of microsatellite study	Modern	1.19	25579848	25551738	25540012	3270056860	3268585745	4952603	11913.4	165	14.6624	155113	44.48	0.57	43	1.1852	99.8901
NDama_Senegal_1990s	NDST	NDST	NDST60	AFT	African taurine	Bos taurus	Senegal	1992	Previously part of microsatellite study	Modern	1.19	29489344	29466174	29456106	3275015827	3273753053	5340611	24058.5	125	14.0677	152488	45.39	0.44	43.92	1.187	99.9214
Sheko	SHKT	SHEK	SHEK10	AFS	African Sanga	Bos taurus/Bos indicus hybrid	Ethiopia	2000	Previously part of microsatellite study	Modern	1.19	30224828	30193117	30176312	3285941714	3284412389	3477476	27264.5	123	13.8155	319607	50.89	0.76	40.82	1.1909	99.8951
Zebu_Gobra	ZEBG	ZEBG	ZEBG19	AFS	African Sanga	Bos indicus	Senegal	1992	Previously part of microsatellite study	Modern	1.19	25549584	25513499	25488718	3292713876	3290675590	2225945	10532.1	184	14.5913	14482	44.86	0.87	41.26	1.1934	99.8588
Afrikaner	AFRI	AFRI	AFRI13	AFS	African Sanga	Bos taurus/Bos indicus hybrid	South Africa	2022	University of Pretoria	Modern	1.18	31544880	31506903	31489488	3247591356	3246276708	3125767	36781.8	111	13.826	98971	46.97	0.66	42.03	1.177	99.8796
East_African_Short_Zebu	EASZ	EASZ	EASZ010	AZE	African Indicine Composite	Bos indicus	Kenya	Recent	Olivier Hanotte / Abdulfatai Tijjani	Modern	1.18	23391782	23294155	23277620	3252666785	3251050608	6795692	6578.84	197	15.1617	114760	47.41	0.7	42.27	1.1789	99.5826
East_African_Short_Zebu	EASZ	EASZ	EASZ185	AZE	African Indicine Composite	Bos indicus	Kenya	Recent	Olivier Hanotte / Abdulfatai Tijjani	Modern	1.18	22655974	22518243	22493812	3249187186	3247733502	6624590	11045.6	276	15.412	114303	46.69	0.71	42.14	1.1776	99.3921
Mbororo	MBOR	MBOR	MBOR44	AFS	African Sanga	Bos taurus/Bos indicus hybrid	Nigeria	1992	Previously part of microsatellite study	Modern	1.18	26402628	26365798	26338664	3258517194	3256649071	2834786	22236.2	156	13.8826	13328	50.39	1.21	36.49	1.181	99.8605
Somba	SOMB	SOMB	SOMB09	AFT	African taurine	Bos taurus	Togo	1992	Previously part of microsatellite study	Modern	1.18	33936184	33910070	33898302	3253355622	3251797989	5952553	32415.3	97	13.4657	150340	47.46	0.62	40.05	1.1791	99.923
Baoule_IvoryCoast_1990s	BICT	BICT	BICT19	AFT	African taurine	Bos taurus	Ivory Coast	1992	Previously part of microsatellite study	Modern	1.17	28114710	28095624	28086856	3234555683	3233314557	3896977	19581.5	136	14.163	81677	45.96	0.53	42.85	1.1723	99.9321
Kuri	KRIT	KURI	KURI40	AFT	African taurine	Bos taurus	Chad	1992	Previously part of microsatellite study	Modern	1.17	25309322	25282820	25267762	3223960201	3222224403	3063460	17359.8	180	14.503	84286	46.28	0.81	40.74	1.1685	99.8953
NDama_Senegal_1990s	NDST	NDST	NDST27	AFT	African taurine	Bos taurus	Senegal	1992	Previously part of microsatellite study	Modern	1.17	27956048	27928771	27917602	3233488721	3232235737	4883197	24285.7	141	14.2088	161187	45.86	0.5	43.17	1.1719	99.9024
East_African_Short_Zebu	EASZ	EASZ	EASZ149	AZE	African Indicine Composite	Bos indicus	Kenya	Recent	Olivier Hanotte / Abdulfatai Tijjani	Modern	1.16	22504940	22406541	22381698	3208280913	3206159789	6376330	10762.9	245	14.9906	113065	47.02	0.98	41.3	1.1628	99.5628
East_African_Short_Zebu	EASZ	EASZ	EASZ087	AZE	African Indicine Composite	Bos indicus	Kenya	Recent	Olivier Hanotte / Abdulfatai Tijjani	Modern	1.16	22127172	22047036	22022830	3204695389	3203270443	5279463	7282.55	285	15.3909	97536	45.91	0.7	43.18	1.1615	99.6378
Baoule_BurkinaFaso_1990s	BBFT	BBFT	BBFT08	AFT	African taurine	Bos taurus	Burkina Faso	1992	Previously part of microsatellite study	Modern	1.16	30661068	30637329	30625074	3212357018	3211255775	4593134	34960.6	115	13.4822	80572	49.91	0.56	39.42	1.1643	99.9226
Fogera	FOGE	FOGE	FOGE12	AFI	African Indicine	Bos taurus/Bos indicus hybrid	Ethiopia	1992	Previously part of microsatellite study	Modern	1.16	28891448	28858535	28843736	3202049936	3200207484	2884553	31272.5	129	14.0865	295419	46.59	0.75	41.98	1.1605	99.8861
Fogera	FOGE	FOGE	FOGE21	AFI	African Indicine	Bos taurus/Bos indicus hybrid	Ethiopia	1992	Previously part of microsatellite study	Modern	1.16	27777754	27744912	27728726	3187273880	3185380380	2609598	22863.8	136	14.2786	297929	46.17	0.79	41.67	1.1552	99.8818
NDama_Senegal_1990s	NDST	NDST	NDST32	AFT	African taurine	Bos taurus	Senegal	1992	Previously part of microsatellite study	Modern	1.16	28105010	28073017	28061118	3190269403	3189016245	4681205	33173.3	136	14.188	151465	46.95	0.53	42.17	1.1562	99.8862
Somba	SOMB	SOMB	SOMB47	AFT	African taurine	Bos taurus	Togo	1992	Previously part of microsatellite study	Modern	1.16	26599420	26577580	26568538	3192205675	3190805025	4423035	13312.4	148	14.4208	154442	45.35	0.55	42.41	1.157	99.9179
Somba	SOMB	SOMB	SOMB48	AFT	African taurine	Bos taurus	Togo	1992	Previously part of microsatellite study	Modern	1.16	26983532	26961639	26950974	3211683639	3210096040	4920652	16443.3	148	14.2175	152150	45.36	0.62	42.26	1.164	99.9189
Afrikaner	AFRI	AFRI	AFRI25	AFS	African Sanga	Bos taurus/Bos indicus hybrid	South Africa	2022	University of Pretoria	Modern	1.15	29898828	29807293	29791592	3174378929	3172936877	2450627	41037	114	14.2438	96221	47.25	0.71	40.21	1.1505	99.6939
Borgou	BORG	BORG	BORG09	AFS	African Sanga	Bos taurus/Bos indicus hybrid	Benin	1992	Previously part of microsatellite study	Modern	1.15	24587250	24547150	24520768	3177261462	3175544939	3354208	11601.1	194	14.6797	79494	45.24	0.83	41.28	1.1515	99.8369
Djakkore_Kolda_1990s	DJKT	DJKT	DJKT14	AFT	African taurine	Bos taurus/Bos indicus hybrid	Senegal	1992	Previously part of microsatellite study	Modern	1.15	29652886	29618014	29604670	3161346050	3160115547	4289657	33057.6	118	13.9208	77703	47.5	0.56	41.67	1.1458	99.8824
Namchi	NAMC	NAMC	NAMC23	AFT	African taurine	Bos taurus	Cameroon	1992	Previously part of microsatellite study	Modern	1.15	26580732	26537570	26506512	3170310272	3168753464	3159040	13825.9	143	14.2719	20301	45.72	0.74	40.22	1.149	99.8376
NDama_Senegal_1990s	NDST	NDST	NDST40	AFT	African taurine	Bos taurus	Senegal	1992	Previously part of microsatellite study	Modern	1.15	25968590	25946499	25936416	3165502686	3164144503	5589261	17920.6	161	14.6303	149527	43.91	0.54	44.21	1.1473	99.9149
Somba	SOMB	SOMB	SOMB36	AFT	African taurine	Bos taurus	Togo	1992	Previously part of microsatellite study	Modern	1.15	25413076	25390684	25381084	3165523152	3164242583	5017427	13304.3	163	14.4578	150630	44.62	0.54	43.66	1.1473	99.9119
Bonsmara	BONS	BONS	BONS20	SAC	South African Composite	Bos taurus/Bos indicus hybrid	South Africa	2022	University of Pretoria	Modern	1.14	30336406	30296672	30280232	3140231937	3139079806	2801501	51985.5	113	13.9356	96511	47.06	0.62	41.66	1.1381	99.869
Bonsmara	BONS	BONS	BONS26	SAC	South African Composite	Bos taurus/Bos indicus hybrid	South Africa	2022	University of Pretoria	Modern	1.14	29428418	29395245	29378642	3143198228	3142076398	2410422	29100.1	117	13.942	96088	46.53	0.62	42.76	1.1392	99.8873
Baoule_IvoryCoast_1990s	BICT	BICT	BICT03	AFT	African taurine	Bos taurus	Ivory Coast	1992	Previously part of microsatellite study	Modern	1.14	27149286	27125631	27114212	3131857999	3130685027	3493990	45411.7	135	14.1697	78660	46.52	0.56	42.01	1.1351	99.9129
Baoule_IvoryCoast_1990s	BICT	BICT	BICT08	AFT	African taurine	Bos taurus	Ivory Coast	1992	Previously part of microsatellite study	Modern	1.14	29037626	29017447	29005960	3131669332	3130585523	3764488	47308	119	13.1448	80443	48.59	0.62	40.77	1.135	99.9305
NDama_Senegal_1990s	NDST	NDST	NDST39	AFT	African taurine	Bos taurus	Senegal	1992	Previously part of microsatellite study	Modern	1.14	27066434	27025604	27013574	3137248549	3136007289	4789072	41113.8	146	14.384	151517	45.99	0.53	42.92	1.137	99.8491
Afrikaner	AFRI	AFRI	AFRI30	AFS	African Sanga	Bos taurus/Bos indicus hybrid	South Africa	2022	University of Pretoria	Modern	1.13	30713318	30645007	30626886	3110175268	3108815257	3175905	30360.6	107	14.2146	95857	47.85	0.69	40.32	1.1272	99.7776
East_African_Short_Zebu	EASZ	EASZ	EASZ116	AZE	African Indicine Composite	Bos indicus	Kenya	Recent	Olivier Hanotte / Abdulfatai Tijjani	Modern	1.13	22035712	21916382	21900630	3126147974	3124421661	6291571	7409.47	225	15.265	109536	47.99	0.8	41.54	1.133	99.4585
Baoule_BurkinaFaso_1990s	BBFT	BBFT	BBFT15	AFT	African taurine	Bos taurus	Burkina Faso	1992	Previously part of microsatellite study	Modern	1.13	29976752	29956019	29944820	3129422765	3128393983	4644666	46269.6	115	12.859	80023	50.55	0.64	37.83	1.1342	99.9308
Blonde	BLON	BLON	BLON06	NAT	North African taurine	Bos taurus	Morroco	1992	Previously part of microsatellite study	Modern	1.13	28059794	28034233	28020928	3120016306	3118990073	2504285	33829.7	127	14.1889	278599	46.87	0.48	42.7	1.1308	99.9089
Fogera	FOGE	FOGE	FOGE17	AFI	African Indicine	Bos taurus/Bos indicus hybrid	Ethiopia	1992	Previously part of microsatellite study	Modern	1.13	27780848	27749518	27733656	3124649194	3122893179	2621767	29919	129	14.0035	274740	46.61	0.77	41.69	1.1325	99.8872
NDama_Senegal_1990s	NDST	NDST	NDST44	AFT	African taurine	Bos taurus	Senegal	1992	Previously part of microsatellite study	Modern	1.13	26935664	26911860	26900380	3109689362	3108484514	4663875	19695.1	137	14.3417	148943	46.44	0.53	42.91	1.127	99.9116
Zebu_Peul	ZEBP	ZEBP	ZEBP17	AFS	African Sanga	Bos indicus	Burkina Faso	1992	Previously part of microsatellite study	Modern	1.13	25796090	25760312	25735626	3128672678	3127003305	2162803	23755.9	150	13.8059	13987	47.86	0.9	40.94	1.1339	99.8613
Afrikaner	AFRI	AFRI	AFRI33	AFS	African Sanga	Bos taurus/Bos indicus hybrid	South Africa	2022	University of Pretoria	Modern	1.12	30355378	30324809	30311198	3080979074	3079694444	3121336	29328.5	108	13.85	94816	46.53	0.65	42.41	1.1166	99.8993
Bonsmara	BONS	BONS	BONS23	SAC	South African Composite	Bos taurus/Bos indicus hybrid	South Africa	2022	University of Pretoria	Modern	1.12	29965584	29886176	29869802	3080694502	3079553902	2604912	25801.7	106	13.8728	94734	47.29	0.6	41.53	1.1165	99.735
East_African_Short_Zebu	EASZ	EASZ	EASZ100	AZE	African Indicine Composite	Bos indicus	Kenya	Recent	Olivier Hanotte / Abdulfatai Tijjani	Modern	1.12	21736806	21657399	21640474	3094575986	3093066346	6043201	7097.08	227	15.2713	108952	47.99	0.75	41.9	1.1216	99.6347
Arado	ARDT	ARAD	ARAD06	AFI	African Indicine	Bos taurus/Bos indicus hybrid	Ethiopia	2000	Previously part of microsatellite study	Modern	1.12	27425394	27392468	27375216	3086685836	3084909242	2639976	25149	130	14.0026	291007	46.39	0.77	42.42	1.1187	99.8799
NDama_Senegal_1990s	NDST	NDST	NDST31	AFT	African taurine	Bos taurus	Senegal	1992	Previously part of microsatellite study	Modern	1.12	26332876	26309745	26299596	3090328763	3089072450	4714389	19289.7	140	14.3161	147395	45.51	0.5	43.63	1.12	99.9122
NDama_Senegal_1990s	NDST	NDST	NDST33	AFT	African taurine	Bos taurus	Senegal	1992	Previously part of microsatellite study	Modern	1.12	26225298	26190345	26178568	3092377688	3091113251	4694596	37634.8	151	14.424	148452	45.85	0.56	42.6	1.1208	99.8667
NDama_Senegal_1990s	NDST	NDST	NDST34	AFT	African taurine	Bos taurus	Senegal	1992	Previously part of microsatellite study	Modern	1.12	27715488	27683430	27671408	3082686131	3081501115	5197801	23845.1	129	14.1008	149065	45.91	0.51	43.13	1.1173	99.8843
NDama_Senegal_1990s	NDST	NDST	NDST45	AFT	African taurine	Bos taurus	Senegal	1992	Previously part of microsatellite study	Modern	1.12	24272834	24250948	24240884	3094047066	3092769755	5493133	15074.9	177	14.6026	149100	44.9	0.55	42.97	1.1214	99.9098
NDama_Senegal_1990s	NDST	NDST	NDST04	AFT	African taurine	Bos taurus	Senegal	1992	Previously part of microsatellite study	Modern	1.12	25974612	25936314	25914738	3081868995	3080678223	1843260	15857.2	142	14.5964	9304	45.12	0.78	43.22	1.117	99.8526
Somba	SOMB	SOMB	SOMB37	AFT	African taurine	Bos taurus	Togo	1992	Previously part of microsatellite study	Modern	1.12	24399300	24371803	24360412	3088597816	3087346998	4608572	17376.3	166	14.5601	147284	44.86	0.53	43.55	1.1194	99.8873
Zebu_Gobra	ZEBG	ZEBG	ZEBG04	AFS	African Sanga	Bos indicus	Senegal	1992	Previously part of microsatellite study	Modern	1.12	24215024	24183178	24164112	3077520113	3075657915	2334115	13999.2	177	14.6502	13744	45.25	0.84	40.71	1.1154	99.8685
Afrikaner	AFRI	AFRI	AFRI21	AFS	African Sanga	Bos taurus/Bos indicus hybrid	South Africa	2022	University of Pretoria	Modern	1.11	28982500	28948989	28932238	3054665294	3053468452	2465363	49438.8	115	13.8811	91675	46.6	0.69	41.71	1.1071	99.8844
Afrikaner	AFRI	AFRI	AFRI40	AFS	African Sanga	Bos taurus/Bos indicus hybrid	South Africa	2022	University of Pretoria	Modern	1.11	30652050	30485298	30467252	3059784518	3058503648	3071886	29436.3	104	14.3426	95365	48.06	0.65	40.1	1.109	99.456
East_African_Short_Zebu	EASZ	EASZ	EASZ195	AZE	African Indicine Composite	Bos indicus	Kenya	Recent	Olivier Hanotte / Abdulfatai Tijjani	Modern	1.11	21348082	21278123	21261874	3049770405	3048284539	5860442	5359.32	238	15.4186	107120	47.85	0.75	41.11	1.1053	99.6723
Nguni	NGUN	NGUN	NGUN38	AFS	African Sanga	Bos taurus/Bos indicus hybrid	South Africa	2022	University of Pretoria	Modern	1.11	37166242	37021974	37000040	3049553671	3048186759	6080654	39531.8	83	13.3511	204536	50.71	0.64	39.61	1.1052	99.6118
Afrikaner	AFRI	AFRI	AFRI04	AFS	African Sanga	Bos taurus/Bos indicus hybrid	South Africa	2000	Previously part of microsatellite study	Modern	1.11	27272006	27247120	27235884	3070575013	3069216038	2578749	23082.3	130	14.1506	281718	45.63	0.59	43.38	1.1129	99.9087
Baoule_IvoryCoast_1990s	BICT	BICT	BICT20	AFT	African taurine	Bos taurus	Ivory Coast	1992	Previously part of microsatellite study	Modern	1.11	26278172	26261249	26253568	3051574554	3050494073	3423894	25864.6	133	13.5653	79588	48.37	0.61	42.59	1.106	99.9356
Mbororo	MBOR	MBOR	MBOR11	AFS	African Sanga	Bos taurus/Bos indicus hybrid	Nigeria	1992	Previously part of microsatellite study	Modern	1.11	25958068	25926527	25908020	3069542359	3067711354	2183205	19523.3	140	14.0011	13073	47.71	0.93	38.4	1.1125	99.8785
Namchi	NAMC	NAMC	NAMC12	AFT	African taurine	Bos taurus	Cameroon	1992	Previously part of microsatellite study	Modern	1.11	27982224	27934935	27913984	3067120978	3065336678	4745762	31616.8	123	12.9326	18715	49.09	1.07	24.91	1.1116	99.831
Somba	SOMB	SOMB	SOMB21	AFT	African taurine	Bos taurus	Togo	1992	Previously part of microsatellite study	Modern	1.11	25832462	25813039	25804130	3072512816	3071282140	4573538	15197.6	148	14.3994	149360	44.66	0.5	43.42	1.1136	99.9248
Afrikaner	AFRI	AFRI	AFRI06	AFS	African Sanga	Bos taurus/Bos indicus hybrid	South Africa	2000	Previously part of microsatellite study	Modern	1.1	26461230	26438198	26427258	3025608221	3024279984	2164784	20049	130	14.3604	279000	45.95	0.61	42.56	1.0966	99.913
Baoule_BurkinaFaso_1990s	BBFT	BBFT	BBFT12	AFT	African taurine	Bos taurus	Burkina Faso	1992	Previously part of microsatellite study	Modern	1.1	27974476	27950426	27936320	3029291273	3028270010	4144786	55104.8	124	12.85	76566	51.42	0.73	36.62	1.0979	99.914
Somba	SOMB	SOMB	SOMB32	AFT	African taurine	Bos taurus	Togo	1992	Previously part of microsatellite study	Modern	1.1	27240018	27225897	27218708	3036018467	3034888172	4501362	18531.8	124	13.9975	146277	45.72	0.44	42.22	1.1003	99.9482
Zebu_Peul	ZEBP	ZEBP	ZEBP20	AFS	African Sanga	Bos indicus	Burkina Faso	1992	Previously part of microsatellite study	Modern	1.1	24527508	24489181	24467966	3043020464	3041355407	1877848	16659	155	14.0925	13578	47.31	0.84	41.98	1.1029	99.8437
East_African_Short_Zebu	EASZ	EASZ	EASZ019	AZE	African Indicine Composite	Bos indicus	Kenya	Recent	Olivier Hanotte / Abdulfatai Tijjani	Modern	1.09	21461900	21344821	21326220	3018539794	3016924775	6192930	7881.54	213	15.2231	106285	47.39	0.82	41.45	1.094	99.4545
Namchi	NAMC	NAMC	NAMC30	AFT	African taurine	Bos taurus	Cameroon	1992	Previously part of microsatellite study	Modern	1.09	25646794	25622629	25608440	3015590955	3014103034	2814578	16770.9	140	14.1486	18459	45.69	0.74	39.97	1.0929	99.9058
Zebu_Peul	ZEBP	ZEBP	ZEBP22	AFS	African Sanga	Bos indicus	Burkina Faso	1992	Previously part of microsatellite study	Modern	1.09	24487190	24465907	24453800	3019148649	3017463265	1822452	18061.2	157	14.2473	11128	46.54	0.9	41.68	1.0942	99.9131
Baoule_BurkinaFaso_1990s	BBFT	BBFT	BBFT09	AFT	African taurine	Bos taurus	Burkina Faso	1992	Previously part of microsatellite study	Modern	1.08	27399654	27378431	27366118	2988335385	2987272819	3922546	47282.6	125	13.4797	74900	50.24	0.63	38.52	1.0831	99.9225
Djakkore_Kolda_1990s	DJKT	DJKT	DJKT13	AFT	African taurine	Bos taurus/Bos indicus hybrid	Senegal	1992	Previously part of microsatellite study	Modern	1.08	26375412	26300369	26286882	2984256439	2983095064	3463565	28887.9	130	14.4061	74923	46.56	0.58	42.44	1.0816	99.7155
Kenana	KNAT	KENA	KENA12	AFI	African Indicine	Bos indicus	South Sudan	1990	Previously part of microsatellite study	Modern	1.08	20182432	20155019	20142256	2976493624	2974584795	1127135	8479.62	275	14.8434	6774	43.87	1.41	43.57	1.0788	99.8642
Namchi	NAMC	NAMC	NAMC36	AFT	African taurine	Bos taurus	Cameroon	1992	Previously part of microsatellite study	Modern	1.08	24803354	24739377	24711830	2976332622	2974885152	2765430	17561.7	148	14.4353	18910	45.73	0.77	39.65	1.0787	99.7421
NDama_Senegal_1990s	NDST	NDST	NDST57	AFT	African taurine	Bos taurus	Senegal	1992	Previously part of microsatellite study	Modern	1.08	26396722	26379633	26371168	2983009647	2981878848	4959874	32677.9	130	14.0944	141567	46.88	0.49	41.35	1.0811	99.9353
Raya_Zebu	RYAT	RAYA	RAYA07	AFI	African Indicine	Bos taurus/Bos indicus hybrid	Ethiopia	2000	Previously part of microsatellite study	Modern	1.08	26422178	26393987	26381128	2968369651	2966655607	2367852	23470.4	128	14.034	275855	46.37	0.79	41.84	1.0758	99.8933
East_African_Short_Zebu	EASZ	EASZ	EASZ127	AZE	African Indicine Composite	Bos indicus	Kenya	Recent	Olivier Hanotte / Abdulfatai Tijjani	Modern	1.07	20582020	20502641	20485036	2950741128	2949036689	5665451	10901.5	240	15.1092	104181	47.46	0.84	41.03	1.0694	99.6143
Nguni	NGUN	NGUN	NGUN30	AFS	African Sanga	Bos taurus/Bos indicus hybrid	South Africa	2022	University of Pretoria	Modern	1.07	32132554	31928211	31902496	2946777804	2945644574	4038360	83410.6	95	14.092	192709	49.38	0.69	38.61	1.068	99.3641
Arado	ARDT	ARAD	ARAD03	AFI	African Indicine	Bos taurus/Bos indicus hybrid	Ethiopia	2000	Previously part of microsatellite study	Modern	1.07	26270510	26245505	26231264	2960979081	2959259994	2302811	28621.5	128	14.0277	281214	46.18	0.78	42.24	1.0731	99.9048
Baoule_BurkinaFaso_1990s	BBFT	BBFT	BBFT11	AFT	African taurine	Bos taurus	Burkina Faso	1992	Previously part of microsatellite study	Modern	1.07	26596686	26577246	26566320	2948232461	2947185402	3549648	53639.1	127	13.1113	76075	48.54	0.65	39.47	1.0685	99.9269
Namchi	NAMC	NAMC	NAMC33	AFT	African taurine	Bos taurus	Cameroon	1992	Previously part of microsatellite study	Modern	1.07	27432732	27353623	27333692	2939013693	2937530162	3748929	21237.4	116	14.0032	19057	47.24	0.75	37.93	1.0652	99.7116
NDama_Senegal_1990s	NDST	NDST	NDST35	AFT	African taurine	Bos taurus	Senegal	1992	Previously part of microsatellite study	Modern	1.07	24717164	24683718	24671482	2943856853	2942615904	4724130	50134.9	155	14.4489	140008	44.75	0.56	43.35	1.0669	99.8647
Somba	SOMB	SOMB	SOMB14	AFT	African taurine	Bos taurus	Togo	1992	Previously part of microsatellite study	Modern	1.07	23528398	23508862	23498932	2961582084	2960392055	4616093	17439.6	176	14.5002	141833	44.83	0.55	43.43	1.0734	99.917
Afrikaner	AFRI	AFRI	AFRI26	AFS	African Sanga	Bos taurus/Bos indicus hybrid	South Africa	2022	University of Pretoria	Modern	1.06	27692658	27663892	27649114	2924934438	2923719023	2501469	25061.3	115	13.8866	92574	46.39	0.64	42.56	1.0601	99.8961
NDama_Senegal_1990s	NDST	NDST	NDST43	AFT	African taurine	Bos taurus	Senegal	1992	Previously part of microsatellite study	Modern	1.06	25714500	25683703	25672940	2937120018	2935999285	4886020	21698.9	134	14.2681	138498	46.38	0.5	43.36	1.0645	99.8802
Afrikaner	AFRI	AFRI	AFRI15	AFS	African Sanga	Bos taurus/Bos indicus hybrid	South Africa	2022	University of Pretoria	Modern	1.05	29549138	29437210	29418994	2888580394	2887424893	3368298	57736.8	104	14.0167	88901	48.42	0.64	40.38	1.0469	99.6212
Afrikaner	AFRI	AFRI	AFRI32	AFS	African Sanga	Bos taurus/Bos indicus hybrid	South Africa	2022	University of Pretoria	Modern	1.05	27187416	27162073	27148550	2904699490	2903466148	2357084	23544.9	116	13.914	88729	46.43	0.66	42.28	1.0528	99.9068
East_African_Short_Zebu	EASZ	EASZ	EASZ172	AZE	African Indicine Composite	Bos indicus	Kenya	Recent	Olivier Hanotte / Abdulfatai Tijjani	Modern	1.05	20286030	20210438	20195012	2891470069	2889668587	5835132	9526.02	231	15.0148	100000	48.17	0.93	41.63	1.048	99.6274
Borgou	BORG	BORG	BORG49	AFS	African Sanga	Bos taurus/Bos indicus hybrid	Benin	1992	Previously part of microsatellite study	Modern	1.05	21992326	21965869	21950730	2897776281	2896206123	3060786	12224.6	200	14.7944	73819	44.74	0.76	41.51	1.0502	99.8797
Djakkore_SouthSenegal_1990s	DJSS	DJSS	DJSS04	AFT	African taurine	Bos taurus/Bos indicus hybrid	South Senegal	1992	Previously part of microsatellite study	Modern	1.05	25210710	25184534	25173880	2889640923	2888543305	3576148	21403.8	133	14.0476	72223	46.16	0.52	42.58	1.0473	99.8962
East_African_Short_Zebu	EASZ	EASZ	EASZ090	AZE	African Indicine Composite	Bos indicus	Kenya	Recent	Olivier Hanotte / Abdulfatai Tijjani	Modern	1.04	19866088	19801827	19784892	2871876926	2870095423	5017696	8354.59	259	14.9731	97626	46.11	0.88	42.31	1.0409	99.6765
Danakil	DANA	DANA	DANA10	AFI	African Indicine	Bos taurus/Bos indicus hybrid	Ethiopia	2000	Previously part of microsatellite study	Modern	1.04	25676870	25642640	25629922	2865824869	2864168587	2461731	26691.1	128	14.1481	264819	46.89	0.79	41.57	1.0387	99.8667
Fogera	FOGE	FOGE	FOGE10	AFI	African Indicine	Bos taurus/Bos indicus hybrid	Ethiopia	1992	Previously part of microsatellite study	Modern	1.04	25515268	25485119	25468894	2871766815	2870116753	2261188	24673.3	129	14.1198	273536	46.33	0.77	41.62	1.0408	99.8818
Kavirondo	KAVI	KAVI	KAVI05	AFI	African Indicine	Bos indicus	Kenya	2000	Previously part of microsatellite study	Modern	1.04	25182004	25155948	25142176	2867469598	2865838575	2224258	26992.1	133	14.0998	262995	46.44	0.76	41.55	1.0393	99.8965
Zebu_Gobra	ZEBG	ZEBG	ZEBG48	AFS	African Sanga	Bos indicus	Senegal	1992	Previously part of microsatellite study	Modern	1.04	22797488	22767433	22747394	2865414786	2863721997	2156426	14739.3	173	14.4735	12681	45.09	0.83	40.95	1.0385	99.8682
Zebu_Peul	ZEBP	ZEBP	ZEBP10	AFS	African Sanga	Bos indicus	Burkina Faso	1992	Previously part of microsatellite study	Modern	1.04	22888366	22849293	22826798	2873471149	2871845798	1798206	17821.1	161	14.2359	12591	46.48	0.91	41.55	1.0414	99.8293
Afrikaner	AFRI	AFRI	AFRI14	AFS	African Sanga	Bos taurus/Bos indicus hybrid	South Africa	2022	University of Pretoria	Modern	1.03	29012142	28974988	28962374	2854628484	2853470300	3467934	34947.1	104	13.739	89049	47.05	0.61	42.38	1.0346	99.8719
Afrikaner	AFRI	AFRI	AFRI29	AFS	African Sanga	Bos taurus/Bos indicus hybrid	South Africa	2022	University of Pretoria	Modern	1.03	26811906	26780136	26764182	2841563614	2840424867	2226132	72115.9	116	13.9086	85502	47.15	0.7	40.44	1.0299	99.8815
Afrikaner	AFRI	AFRI	AFRI34	AFS	African Sanga	Bos taurus/Bos indicus hybrid	South Africa	2022	University of Pretoria	Modern	1.03	27340318	27308017	27293636	2845246919	2844055382	2569501	41201.5	114	13.8609	88174	46.8	0.64	42.27	1.0312	99.8819
East_African_Short_Zebu	EASZ	EASZ	EASZ191	AZE	African Indicine Composite	Bos indicus	Kenya	Recent	Olivier Hanotte / Abdulfatai Tijjani	Modern	1.03	19786822	19712498	19686592	2850721068	2848778551	5770899	11382.2	270	14.7084	99267	46.97	1.03	40.83	1.0332	99.6244
East_African_Short_Zebu	EASZ	EASZ	EASZ069	AZE	African Indicine Composite	Bos indicus	Kenya	Recent	Olivier Hanotte / Abdulfatai Tijjani	Modern	1.03	20184286	20087730	20075160	2852255363	2850585346	5653099	6916.53	220	15.0601	101063	47.57	0.83	41.36	1.0337	99.5216
Baoule_BurkinaFaso_1990s	BBFT	BBFT	BBFT05	AFT	African taurine	Bos taurus	Burkina Faso	1992	Previously part of microsatellite study	Modern	1.03	25390916	25374759	25364958	2843664424	2842629994	3483203	30071.9	127	13.6349	70809	50.27	0.62	38.89	1.0306	99.9364
Baoule_BurkinaFaso_1990s	BBFT	BBFT	BBFT17	AFT	African taurine	Bos taurus	Burkina Faso	1992	Previously part of microsatellite study	Modern	1.03	25251302	25236186	25227730	2829585413	2828600597	3306799	28073.5	128	13.812	71014	48.56	0.6	41.22	1.0255	99.9401
Baoule_BurkinaFaso_1990s	BBFT	BBFT	BBFT21	AFT	African taurine	Bos taurus	Burkina Faso	1992	Previously part of microsatellite study	Modern	1.03	23684868	23663055	23651456	2849183746	2848112640	3093670	21167	149	14.2644	72448	47.86	0.63	41.44	1.0326	99.9079
Baoule_IvoryCoast_1990s	BICT	BICT	BICT01	AFT	African taurine	Bos taurus	Ivory Coast	1992	Previously part of microsatellite study	Modern	1.03	25758128	25738186	25729204	2834506051	2833531124	3674872	26802	123	13.6574	70319	47.45	0.54	42.61	1.0273	99.9226
Baoule_IvoryCoast_1990s	BICT	BICT	BICT11	AFT	African taurine	Bos taurus	Ivory Coast	1992	Previously part of microsatellite study	Modern	1.03	24594594	24574372	24563654	2850458455	2849407761	3183281	21725.7	135	14.1558	72699	46.1	0.53	43.11	1.0331	99.9178
Borgou	BORG	BORG	BORG06	AFS	African Sanga	Bos taurus/Bos indicus hybrid	Benin	1992	Previously part of microsatellite study	Modern	1.03	21679864	21653870	21639450	2838046471	2836614311	2522396	11442.5	204	14.6763	67588	45.12	0.94	42.14	1.0286	99.8801
Namchi	NAMC	NAMC	NAMC46	AFT	African taurine	Bos taurus	Cameroon	1992	Previously part of microsatellite study	Modern	1.03	22854688	22822592	22799878	2854632513	2853222255	2565682	12136.1	162	14.629	18018	44.86	0.78	41.02	1.0346	99.8596
NDama_Senegal_1990s	NDST	NDST	NDST23	AFT	African taurine	Bos taurus	Senegal	1992	Previously part of microsatellite study	Modern	1.03	23832982	23808167	23798762	2848918053	2847705882	4318705	19519	146	14.3737	136428	44.61	0.53	43.82	1.0325	99.8959
Raya_Zebu	RYAT	RAYA	RAYA05	AFI	African Indicine	Bos taurus/Bos indicus hybrid	Ethiopia	2000	Previously part of microsatellite study	Modern	1.03	24207318	24183614	24173286	2828660225	2826928280	2070900	19433.7	136	14.1733	259968	45.93	0.83	41.49	1.0252	99.9021
Afrikaner	AFRI	AFRI	AFRI08	AFS	African Sanga	Bos taurus/Bos indicus hybrid	South Africa	2022	University of Pretoria	Modern	1.02	27770556	27740189	27721946	2814030548	2812903277	2479080	46863.2	107	13.6805	86972	47.36	0.62	41.23	1.0199	99.8907
Afrikaner	AFRI	AFRI	AFRI10	AFS	African Sanga	Bos taurus/Bos indicus hybrid	South Africa	2022	University of Pretoria	Modern	1.02	27854580	27782376	27767364	2804041600	2802819513	2629668	31048.2	104	14.0867	86741	47.71	0.66	40.36	1.0163	99.7408
Afrikaner	AFRI	AFRI	AFRI38	AFS	African Sanga	Bos taurus/Bos indicus hybrid	South Africa	2022	University of Pretoria	Modern	1.02	27345252	27166292	27150182	2817188886	2816009349	2160447	23783.7	108	14.4026	77260	47.1	0.82	40.68	1.021	99.3456
East_African_Short_Zebu	EASZ	EASZ	EASZ187	AZE	African Indicine Composite	Bos indicus	Kenya	Recent	Olivier Hanotte / Abdulfatai Tijjani	Modern	1.02	19575648	19506732	19487064	2808670917	2806898330	5602927	8711.82	242	14.9525	100081	46.44	0.91	42.38	1.0179	99.648
East_African_Short_Zebu	EASZ	EASZ	EASZ138	AZE	African Indicine Composite	Bos indicus	Kenya	Recent	Olivier Hanotte / Abdulfatai Tijjani	Modern	1.02	19670028	19614970	19602116	2822290770	2821181519	5263461	9801.39	236	15.455	99319	49.35	0.64	41.3	1.0229	99.7201
[truncated: 419 more rows]

## Sheet: S. Table 3
Population	P1 (HRF)	P2 (target, X)	P3 (CHO)	P4 (OUT)	D	Z	nABBA	nBABA	No. SNPs	Significant (|Z|>3)
[truncated: 1,947 more rows]

## Sheet: S. Table 4
Population	X (target)	α (African taurine prop.)	SE (α)	Z (α/SE)	1 − α (indicine prop.)	No. SNPs	D Z-score	D significant (|Z|>3)
[truncated: 1,946 more rows]

[truncated: 12 more sheets: S. Table 5, S. Table 6, S. Table 7, S. Table 8, S. Table 9, S. Table 10, S. Table 11, S. Table 12, S. Table 13, S. Table 14, S. Table 15, S. Table 16]
